# Supplementary material for: Morquio A Syndrome: Identification of Differential Patterns of Molecular Pathway Interactions in Bone Lesions
Source: MDPI journal article supplement (doi:10.3390/ijms25063232), 2024-03-12
Supplement: s1 [file s1]

| Protein | Code  | Name                                                                     | Interac<br>Ldha | Interac<br>Ldhb | UNT vs WT<br>FC |
|---------|-------|--------------------------------------------------------------------------|-----------------|-----------------|-----------------|
| P12787  | COX5A | Cytochrome c oxidase subunit 5A, mitochondrial                           | Yes             | No              | 5.6382          |
| P97457  | MLRS  | Myosin regulatory light chain 2, skeletal muscle isoform                 | Yes             | No              | 9.3929          |
| P62897  | CYC   | Cytochrome c, somatic                                                    | Yes             | No              | 4.9513          |
| P0DP28  | CALM3 | Calmodulin-3                                                             | Yes             | No              | 0.1649          |
| Q9CQQ7  | AT5F1 | ATP synthase F(0) complex subunit B1, mitochondrial                      | Yes             | No              | 2.1821          |
| P17742  | PPIA  | Peptidyl-prolyl cis-trans isomerase A                                    | Yes             | No              | 0.4396          |
| P34884  | MIF   | Macrophage migration inhibitory factor                                   | Yes             | No              | 7.8439          |
| P10126  | EF1A1 | Elongation factor 1-alpha 1                                              | Yes             | No              | 3.1414          |
| P07724  | ALBU  | Albumin                                                                  | Yes             | No              | 27.5579         |
| Q91VD9  | NDUS1 | NADH-ubiquinone oxidoreductase 75 kDa subunit, mitochondrial             | No              | Yes             | 2.0976          |
| Q8BH95  | ECHM  | Enoyl-CoA hydratase, mitochondrial                                       | No              | Yes             | 0.4641          |
| P11404  | FABPH | Fatty acid-binding protein, heart                                        | No              | Yes             | 33.7581         |
| P05202  | AATM  | Aspartate aminotransferase, mitochondrial                                | Yes             | Yes             | 7.8887          |
| P06745  | G6PI  | Glucose-6-phosphate isomerase                                            | Yes             | Yes             | 3.2287          |
| P05064  | ALDOA | Fructose-bisphosphate aldolase A                                         | Yes             | Yes             | 18.7808         |
| Q9D0F9  | PGM1  | Phosphoglucomutase-1                                                     | Yes             | Yes             | 1.9249          |
| P17182  | ENOA  | Alpha-enolase                                                            | Yes             | Yes             | 0.2793          |
| P35700  | PRDX1 | Peroxiredoxin-1                                                          | Yes             | Yes             | 3.4018          |
| Q61171  | PRDX2 | Peroxiredoxin-2                                                          | Yes             | Yes             | 8.0147          |
| Q9D051  | ODPB  | Pyruvate dehydrogenase E1 component subunit beta, mitochondrial          | Yes             | Yes             | 0.3913          |
| Q8K2B3  | SDHA  | Succinate dehydrogenase [ubiquinone] flavoprotein subunit, mitochondrial | Yes             | Yes             | 2.6715          |
| Q9CQA3  | SDHB  | Succinate dehydrogenase [ubiquinone] iron-sulfur subunit, mitochondrial  | Yes             | Yes             | 14.5768         |
| Q9D6R2  | IDH3A | Isocitrate dehydrogenase [NAD] subunit alpha, mitochondrial              | Yes             | Yes             | 3.4270          |
| P08249  | MDH2  | Malate dehydrogenase, mitochondrial                                      | Yes             | Yes             | 19.0472         |
| P17751  | TPI1  | Triosephosphate isomerase                                                | Yes             | Yes             | 16.6208         |
| Q91YT0  | NDUV1 | NADH dehydrogenase [ubiquinone] flavoprotein 1, mitochondrial            | Yes             | Yes             | 3.9303          |
| Q9DB20  | ATPO  | ATP synthase subunit O, mitochondrial                                    | Yes             | Yes             | 6.7524          |
| O08749  | DLDH  | Dihydrolipoyl dehydrogenase, mitochondrial                               | Yes             | Yes             | 1.9254          |
| Q9WUB3  | PYGM  | Glycogen phosphorylase, muscle form                                      | Yes             | Yes             | 0.3059          |
