# Supplementary material for: Morquio A Syndrome: Identification of Differential Patterns of Molecular Pathway Interactions in Bone Lesions
Source: MDPI journal article supplement (doi:10.3390/ijms25063232), 2024-03-12
Supplement: s1 [file s1]

Supplementary Table S3

(FC>1 elevated in UNT group, FC<1 elevated in WT group)

Section S1.1. Glycolysis, male UNT vs male WT mice

| Protein | Code  | Name                                                     | SWATH   |         |
|---------|-------|----------------------------------------------------------|---------|---------|
|         |       |                                                          | P_value | FC      |
| P06745  | Gpi   | Glucose-6-phosphate isomerase                            | 0.0043  | 3.2287  |
| P05064  | Aldoa | Fructose-bisphosphate aldolase A                         | 0.0375  | 18.7808 |
| P13707  | Gpd1  | Glycerol-3-phosphate dehydrogenase [NAD(+)], cytoplasmic | 0.0520  | 1.4896  |
| Q9D0F9  | Pgm1  | Phosphoglucomutase-1                                     | 0.0205  | 1.9249  |
| P17182  | Eno1  | Alpha-enolase                                            | 0.0121  | 0.2793  |
| P21550  | Eno3  | Beta-enolase                                             | 0.0525  | 4.5256  |
| P06151  | Ldha  | L-lactate dehydrogenase A chain                          | 0.0434  | 9.0581  |
| P16125  | Ldhb  | L-lactate dehydrogenase B chain                          | 0.0089  | 2.5319  |

Section S1.2. TCA. male UNT vs male WT mice

| Protein | Code  | Name                                                                     | SWATH   |         |
|---------|-------|--------------------------------------------------------------------------|---------|---------|
|         |       |                                                                          | P_value | FC      |
| Q9D051  | Pdhb  | Pyruvate dehydrogenase E1 component subunit beta, mitochondrial          | 0.0362  | 0.3913  |
| Q9D6R2  | Idh3a | Isocitrate dehydrogenase [NAD] subunit alpha, mitochondrial              | 0.0144  | 3.4270  |
| Q8K2B3  | Sdha  | Succinate dehydrogenase [ubiquinone] flavoprotein subunit, mitochondrial | 0.0327  | 2.6715  |
| P08249  | Mdh2  | Malate dehydrogenase, mitochondrial                                      | 0.0426  | 19.0472 |

Section S1.3. OXPHOS, male UNT vs male WT

| Protein   | Code   | Name                                    | SWATH   |         |
|-----------|--------|-----------------------------------------|---------|---------|
|           |        |                                         | P_value | FC      |
| Complex I |        |                                         |         |         |
| Q9CQZ5    | Ndufa6 | NADH dehydrogenase [ubiquinone] 1 alpha | 0.0246  | 86.5140 |

|                        |         |                                                                          |         |         |
|------------------------|---------|--------------------------------------------------------------------------|---------|---------|
|                        |         | subcomplex subunit 6                                                     |         |         |
| Q9ERS2                 | Ndufa13 | NADH dehydrogenase [ubiquinone] 1 alpha subcomplex subunit 13            | 0.0166  | 8.1749  |
| Q9CQJ8                 | Ndufb9  | NADH dehydrogenase [ubiquinone] 1 beta subcomplex subunit 9              | 0.0246  | 3.3900  |
| Q9CQ54                 | Ndufc2  | NADH dehydrogenase [ubiquinone] 1 subunit C2                             | 0.0452  | 3.5213  |
| Q91VD9                 | Ndufs1  | NADH-ubiquinone oxidoreductase 75 kDa subunit, mitochondrial             | 0.0199  | 2.0976  |
| Q91YT0                 | Ndufv1  | NADH dehydrogenase [ubiquinone] flavoprotein 1, mitochondrial            | 0.0340  | 3.9303  |
| Protein                | Code    | Name                                                                     | SWATH   |         |
|                        |         |                                                                          | P_value | FC      |
| Complex II             |         |                                                                          |         |         |
| Q8K2B3                 | Sdha    | Succinate dehydrogenase [ubiquinone] flavoprotein subunit, mitochondrial | 0.0327  | 2.6715  |
| Q9CQA3                 | Sdhb    | Succinate dehydrogenase [ubiquinone] iron-sulfur subunit, mitochondrial  | 0.0028  | 14.5768 |
| Complex III            |         |                                                                          |         |         |
| Q9CR68                 | Uqcrrs1 | Cytochrome b-c1 complex subunit Rieske, mitochondrial                    | 0.0552  | 1.5274  |
| Complex IV             |         |                                                                          |         |         |
| P12787                 | Cox5a   | Cytochrome c oxidase subunit 5A, mitochondrial                           | 0.0106  | 5.6382  |
| P43023                 | Cox6a2  | Cytochrome c oxidase subunit 6A2, mitochondrial                          | 0.0177  | 5.1320  |
| P56391                 | Cox6b1  | Cytochrome c oxidase subunit 6B1                                         | 0.0034  | 2.5879  |
| P48771                 | Cox7a2  | Cytochrome c oxidase subunit 7A2, mitochondrial                          | 0.0359  | 5.1496  |
| ATP synthase Complex V |         |                                                                          |         |         |
| Q9D3D9                 | Atp5f1d | ATP synthase subunit delta, mitochondrial                                | 0.0039  | 5.1416  |
| P56135                 | Atp5mf  | ATP synthase subunit f, mitochondrial                                    | 0.0369  | 12.1206 |
| Q9CQQ7                 | Atp5pb  | ATP synthase F(0) complex subunit B1, mitochondrial                      | 0.0228  | 2.1821  |
| Q9DCX2                 | Atp5pd  | ATP synthase subunit d, mitochondrial                                    | 0.0017  | 2.1766  |
| Q9DB20                 | Atp5po  | ATP synthase subunit O, mitochondrial                                    | 0.0309  | 6.7524  |
| Q78IK2                 | Atp5mk  | ATP synthase membrane subunit K, mitochondrial                           | 0.0457  | 0.2169  |

#### Section S1.4. Beta oxidation, male UNT vs male WT

| Protein | Code | Name | SWATH   |    |
|---------|------|------|---------|----|
|         |      |      | P_value | FC |

|        |        |                                                                |        |         |
|--------|--------|----------------------------------------------------------------|--------|---------|
| P50544 | Acadvl | Very long-chain specific acyl-CoA dehydrogenase, mitochondrial | 0.0226 | 3.4695  |
| P42125 | Eci1   | Enoyl-CoA delta isomerase 1, mitochondrial                     | 0.0023 | 0.6253  |
| P11404 | Fabp3  | Fatty acid-binding protein, heart                              | 0.0490 | 33.7581 |

#### Section S2.1. ROS, male UNT vs male WT

| Protein | Code   | Name                                                    | SWATH   | Protein |
|---------|--------|---------------------------------------------------------|---------|---------|
|         |        |                                                         | P_value | FC      |
| P08228  | Sod1   | Superoxide dismutase [Cu-Zn]                            | 0.0160  | 9.8360  |
| P35700  | Prdx1  | Peroxiredoxin-1                                         | 0.0069  | 3.4018  |
| Q61171  | Prdx2  | Peroxiredoxin-2                                         | 0.0051  | 8.0147  |
| P20108  | Prdx3  | Thioredoxin-dependent peroxide reductase, mitochondrial | 0.0265  | 24.7061 |
| P99029  | Prdx5  | Peroxiredoxin-5                                         | 0.0263  | 6.4456  |
| P27005  | S100a8 | Protein S100-A8                                         | 0.0062  | 2.9169  |
| P31725  | S100a9 | Protein S100-A9                                         | 0.0300  | 17.3367 |

#### Section S2.2. Iron transport, male UNT vs male WT

| Protein | Code   | Name                                          | SWATH   |         |
|---------|--------|-----------------------------------------------|---------|---------|
|         |        |                                               | P_value | FC      |
| Q921I1  | Tf     | Serotransferrin                               | 0.004   | 4.455   |
| Q91WS0  | Cisd1  | CDGSH iron-sulfur domain-containing protein 1 | 0.023   | 7.278   |
| P09528  | Fth1   | Ferritin heavy chain                          | 0.029   | 17.2605 |
| P04247  | Mb     | Myoglobin                                     | 0.0455  | 33.4430 |
| P02088  | Hbb-b1 | Hemoglobin subunit beta-1                     | 0.043   | 7.706   |
| Q61646  | Hp     | Haptoglobin                                   | 0.012   | 2.706   |
| Q91X72  | Hpx    | Hemopexin                                     | 0.002   | 7.352   |

#### Section S2.3. DNA damage, male UNT vs male WT

| Protein | Code  | Name                              | SWATH   |         |
|---------|-------|-----------------------------------|---------|---------|
|         |       |                                   | P_value | FC      |
| P17751  | Tpi1  | Triosephosphate isomerase         | 0.0225  | 16.6208 |
| P0CG50  | Ubb   | Polyubiquitin-B                   | 0.0088  | 39.5216 |
| P61089  | Ube2n | Ubiquitin-conjugating enzyme E2 N | 0.0386  | 3.9333  |

Section S3.1. Nucleocytoplasmic traffic of macromolecules and e histones, male UNT vs Mtol WT.

| Protein | Code  | Name          | SWATH    |         |
|---------|-------|---------------|----------|---------|
|         |       |               | P_value  | FC      |
| P10922  | H1-0  | Histone H1.0  | 2.09E-06 | 15.7769 |
| P43275  | H1-1  | Histone H1.1  | 0.0124   | 2.6155  |
| P15864  | H1-2  | Histone H1.2  | 0.0158   | 14.7239 |
| P43274  | H1-4  | Histone H1.4  | 0.0263   | 32.3093 |
| Q3THW5  | H2az2 | Histone H2A.V | 0.0332   | 10.3191 |
| P62806  | H4c1  | Histone H4    | 0.0276   | 22.0122 |

Section S3.2. Ribosomes, male UNT vs male WT.

| Protein | Code  | Name                      | SWATH   |        |
|---------|-------|---------------------------|---------|--------|
|         |       |                           | P_value | FC     |
| P97461  | Rps5  | 40S ribosomal protein S5  | 0.0178  | 9.3185 |
| P62270  | Rps18 | 40S ribosomal protein S18 | 0.0358  | 3.2491 |
| Q9CZX8  | Rps19 | 40S ribosomal protein S19 | 0.0317  | 1.9008 |
| P60867  | Rps20 | 40S ribosomal protein S20 | 0.0305  | 2.0351 |
| P62852  | Rps25 | 40S ribosomal protein S25 | 0.0425  | 5.4571 |
| P35979  | Rpl12 | 60S ribosomal protein L12 | 0.0281  | 6.4042 |

Section S3.3. Proteasome, male UNT vs male WT

| Protein | Code  | Name                                   | SWATH   |        |
|---------|-------|----------------------------------------|---------|--------|
|         |       |                                        | P_value | FC     |
| P97372  | Psme2 | Proteasome activator complex subunit 2 | 0.0009  | 2.0607 |

Section S3.4. Vesicular transport, male UNT vs male WT

| Protein | Code    | Name                        | SWATH   |        |
|---------|---------|-----------------------------|---------|--------|
|         |         |                             | P_value | FC     |
| P35278  | Rab5c   | Ras-related protein Rab-5C  | 0.0026  | 4.2406 |
| P46638  | Rab11b  | Ras-related protein Rab-11B | 0.0040  | 2.4525 |
| Q9CYZ2  | Tpd52l2 | Tumor protein D54           | 0.0383  | 7.4121 |

Section S3.5. Lysosome, male UNT vs male WT

| Protein           | Code | Name | SWATH   |    |
|-------------------|------|------|---------|----|
|                   |      |      | P_value | FC |
| Lysosome membrane |      |      |         |    |

|                   |        |                                               |        |        |
|-------------------|--------|-----------------------------------------------|--------|--------|
| P24668            | M6pr   | Cation-dependent mannose-6-phosphate receptor | 0.0047 | 3.2882 |
| P11438            | Lamp1  | Lysosome-associated membrane glycoprotein 1   | 0.0098 | 2.7102 |
| P16045            | Lgals1 | Galectin-1                                    | 0.0179 | 9.2213 |
| P16110            | Lgals3 | Galectin-3                                    | 0.0260 | 3.2915 |
| Lysosomal enzymes |        |                                               |        |        |
| Q9WV54            | Asah1  | Acid ceramidase                               | 0.0527 | 0.1694 |

#### Section S3.6. Cytoskeleton, male UNT vs male WT

| Protein | Code   | Name                                                                | SWATH   |        |
|---------|--------|---------------------------------------------------------------------|---------|--------|
|         |        |                                                                     | P_value | FC     |
| P0DP28  | Calm3  | Calmodulin-3                                                        | 0.0244  | 0.1649 |
| P68134  | Acta1  | Actin, alpha skeletal muscle                                        | 0.0527  | 0.1694 |
| P10833  | Rras   | Ras-related protein R-Ras                                           | 0.0029  | 2.6307 |
| Q62234  | Myom1  | Myomesin-1                                                          | 0.0376  | 0.4040 |
| P97457  | Myfpl  | Myosin regulatory light chain 2, skeletal muscle isoform            | 0.0188  | 9.3929 |
| P51667  | Myl2   | Myosin regulatory light chain 2, ventricular/cardiac muscle isoform | 0.0371  | 5.4004 |
| Q61792  | Lasp1  | LIM and SH3 domain protein 1                                        | 0.0050  | 3.2746 |
| P20801  | Tnnc2  | Troponin C, skeletal muscle                                         | 0.0301  | 0.2303 |
| Q80X90  | Flnb   | Filamin-B                                                           | 0.0466  | 0.4545 |
| P47754  | Capza2 | F-actin-capping protein subunit alpha-2                             | 0.0335  | 2.2634 |
| P26039  | Tln1   | Talin-1                                                             | 0.0309  | 1.7377 |
| Q9QUI0  | Rhoa   | Transforming protein RhoA                                           | 0.0080  | 4.4309 |
| Q9ESM6  | Gdpd2  | Glycerophosphoinositol inositolphosphodiesterase GDPD2              | 0.0305  | 0.0173 |
| Q9JM76  | Arpc3  | Actin-related protein 2/3 complex subunit 3                         | 0.0012  | 3.9724 |
| Q9CPW4  | Arpc5  | Actin-related protein 2/3 complex subunit 5                         | 0.0179  | 9.5173 |
| Q9D898  | Arpc5l | Actin-related protein 2/3 complex subunit 5-like protein            | 0.0088  | 3.0402 |

#### Section S4.1. Extracellular matrix, hyaluronan and proteoglycans, male UNT vs male WT

| Protein                          | Code   | Name                                       | SWATH   |        |
|----------------------------------|--------|--------------------------------------------|---------|--------|
|                                  |        |                                            | P_value | FC     |
| Proteoglycans                    |        |                                            |         |        |
| Hyalectans                       |        |                                            |         |        |
| Q9QUP5                           | Hapln1 | Hyaluronan and proteoglycan link protein 1 | 0.0140  | 1.7277 |
| Small Leucine-rich proteoglycans |        |                                            |         |        |
| Class I                          |        |                                            |         |        |
| P28654                           | Dcn    | Decorin                                    | 0.0005  | 3.0871 |
| Class II                         |        |                                            |         |        |

|          |       |                |        |         |
|----------|-------|----------------|--------|---------|
| P50608   | Fmod  | Fibromodulin   | 0.0450 | 6.9376  |
| P51885   | Lum   | Lumican        | 0.0175 | 20.7626 |
| Q9JK53   | Prelp | Prolargin      | 0.0174 | 15.2827 |
| O35367   | Kera  | Keratocan      | 0.0383 | 12.1981 |
| Class IV |       |                |        |         |
| O55226   | Chad  | Chondroadherin | 0.0446 | 2.0533  |

#### Section S4.2. Extracellular matrix, Collagens, male UNT vs male WT

| Protein            | Code    | Name                       | SWATH   |         |
|--------------------|---------|----------------------------|---------|---------|
|                    |         |                            | P_value | FC      |
| Fibrillar collagen |         |                            |         |         |
| P11087             | Col1a1  | Collagen alpha-1(I) chain  | 0.0137  | 24.3614 |
| Q01149             | Col1a2  | Collagen alpha-2(I) chain  | 0.0360  | 70.2564 |
| P28481             | Col2a1  | Collagen alpha-1(II) chain | 0.0120  | 2.1669  |
| Q61245             | Col11a1 | Collagen alpha-1(XI) chain | 0.0187  | 12.4530 |
| Q64739             | Col11a2 | Collagen alpha-2(XI) chain | 0.0161  | 10.7360 |

#### Section S4.3. Extracellular matrix: matricellular proteins, male UNT vs male WT

| Protein                        | Code  | Name                                                                 | SWATH   |         |
|--------------------------------|-------|----------------------------------------------------------------------|---------|---------|
|                                |       |                                                                      | P_value | FC      |
| Extracellular matrix targeting |       |                                                                      |         |         |
| P35441                         | Thbs1 | Thrombospondin-1                                                     | 0.0309  | 10.4717 |
| Q05793                         | Hspg2 | Basement membrane-specific heparan sulfate proteoglycan core protein | 0.0346  | 2.8603  |

#### Section S4.4. Extracellular matrix: extracellular matrix proteases, male UNT vs male WT

| Protein                        | Code | Name                       | SWATH   |        |
|--------------------------------|------|----------------------------|---------|--------|
|                                |      |                            | P_value | FC     |
| Extracellular matrix proteases |      |                            |         |        |
| Metzincin                      |      |                            |         |        |
| P41245                         | Mmp9 | Matrix metalloproteinase-9 | 0.0125  | 5.5616 |
| Plasminogen/plasmin system     |      |                            |         |        |

|                      |           |                                   |        |        |
|----------------------|-----------|-----------------------------------|--------|--------|
| P07759               | Serpina3k | Serine protease inhibitor A3K     | 0.0413 | 1.0905 |
| Q9D154               | Serpinb1a | Leukocyte elastase inhibitor A    | 0.0264 | 2.9116 |
| P97298               | Serpinf1  | Pigment epithelium-derived factor | 0.0469 | 9.2363 |
| Cathepsins proteases |           |                                   |        |        |
| Aspartic proteases   |           |                                   |        |        |
| P18242               | Ctsd      | Cathepsin D                       | 0.0489 | 5.5031 |
| Cysteine proteases   |           |                                   |        |        |
| P49935               | Ctsh      | Pro-cathepsin H                   | 0.0226 | 3.8861 |

#### Section S4.5. Extracellular matrix: extracellular matrix receptor, male UNT vs male WT

| Protein   | Code  | Name                             | SWATH   |        |
|-----------|-------|----------------------------------|---------|--------|
|           |       |                                  | P_value | FC     |
| Integrins |       |                                  |         |        |
| Q61738    | Itga7 | Integrin alpha-7                 | 0.0140  | 1.9660 |
| P05555    | Itgam | Integrin alpha-M                 | 0.0038  | 3.7745 |
| P43406    | Itgav | Integrin alpha-V                 | 0.0018  | 3.5819 |
| P11835    | Itgb2 | Integrin beta-2                  | 0.0266  | 2.6178 |
| P29533    | Vcam1 | Vascular cell adhesion protein 1 | 0.0375  | 0.3312 |

#### Section S4.6. Extracellular matrix: discoidin domain receptors, male UNT vs male WT

| Protein | Code  | Name                             | SWATH   |        |
|---------|-------|----------------------------------|---------|--------|
|         |       |                                  | P_value | FC     |
| P60766  | Cdc42 | Cell division control protein 42 | 0.0287  | 2.5824 |

#### Section S4.7. Extracellular matrix: CD receptors, male UNT vs male WT

| Protein | Code  | Name          | SWATH   |         |
|---------|-------|---------------|---------|---------|
|         |       |               | P_value | FC      |
| P31428  | Dpep1 | Dipeptidase 1 | 0.0258  | 79.0435 |

#### Section S5.1. Other proteins of interest, male UNT vs male WT

| Protein | Code  | Name        | SWATH   |         |
|---------|-------|-------------|---------|---------|
|         |       |             | P_value | FC      |
| O70622  | Rtn2  | Reticulon-2 | 0.0388  | 4.6641  |
| Q9QXC1  | Fetub | Fetuin-B    | 0.0420  | 11.0009 |
| P07724  | Alb   | Albumin     | 0.0332  | 27.5579 |

|        |       |                                       |        |        |
|--------|-------|---------------------------------------|--------|--------|
| Q6P8J7 | Ckmt2 | Creatine kinase S-type, mitochondrial | 0.0354 | 8.4023 |
|--------|-------|---------------------------------------|--------|--------|
