# Supplementary material for: Morquio A Syndrome: Identification of Differential Patterns of Molecular Pathway Interactions in Bone Lesions
Source: Int J Mol Sci. 2024 Mar 12;25(6):3232. doi: 10.3390/ijms25063232 (PMC10970612; doi:10.3390/ijms25063232)
Supplement: Supplementary file 1 [file ijms-25-03232-s001.zip]

Archive with 11 entries (11 files):
- Supplemental data legends.pdf
- Supplementary Figure S1.TIF
- supplementary Material and methods_rev.pdf
- Supplementary Table S1.xlsx
- Supplementary Table S2.xls
- Supplementary Table S3.pdf
- supplementary Table S4.xlsx
- supplementary Table S5.xlsx
- supplementary Table S6.xlsx
- supplementary table S7.xls
- Supplementary table S8.pdf
