# Supplementary material for: Morquio A Syndrome: Identification of Differential Patterns of Molecular Pathway Interactions in Bone Lesions
Source: Int J Mol Sci. 2024 Mar 12;25(6):3232. doi: 10.3390/ijms25063232 (PMC10970612; doi:10.3390/ijms25063232)
Supplement: Supplementary file 1 [file ijms-25-03232-s001.zip › Supplementary Table S2.xls]

## Sheet: SWATH- MS UNT to WT
Peak Name	m/z		Group	Use	t-value	p-value	Log (p)	Mean UNT	Mean WT	Median UNT	Median WT	Sigma UNT	Sigma WT	Delta	Fold Change	Log (Fold Change)
sp|P10922|H10_MOUSE			Histone H1.0 OS=Mus musculus OX=10090 GN=H1-0 PE=2 SV=4	TRUE	17.6937	2.09288e-06	-5.67926	21858.3	1385.45	21462.3	1503.76	2183.33	767.026	20472.8	15.777	1.19802
sp|O09131|GSTO1_MOUSE			Glutathione S-transferase omega-1 OS=Mus musculus OX=10090 GN=Gsto1 PE=1 SV=2	TRUE	10.5927	4.16708e-05	-4.38017	7309.94	2643.92	7130.69	2449.6	733.642	487.757	4666.03	2.76481	0.441666
sp|Q3UBX0|TM109_MOUSE			Transmembrane protein 109 OS=Mus musculus OX=10090 GN=Tmem109 PE=1 SV=2	TRUE	9.93489	6.01174e-05	-4.221	40197.3	7823.96	40497.4	6460.68	4522.43	4692.56	32373.3	5.13771	0.71077
sp|P06728|APOA4_MOUSE			Apolipoprotein A-IV OS=Mus musculus OX=10090 GN=Apoa4 PE=1 SV=3	TRUE	6.80536	0.000493292	-3.3069	67486.1	15533.8	70339.7	13935.6	13554.6	7027.6	51952.3	4.34446	0.637936
sp|P28654|PGS2_MOUSE			Decorin OS=Mus musculus OX=10090 GN=Dcn PE=1 SV=1	TRUE	6.76584	0.00050903	-3.29326	281516	91192.1	263537	90343	42114	37304.5	190324	3.08707	0.489546
sp|Q7M6Y3|PICAL_MOUSE			Phosphatidylinositol-binding clathrin assembly protein OS=Mus musculus OX=10090 GN=Picalm PE=1 SV=1	TRUE	6.26123	0.000770378	-3.1133	5240.98	1360.23	5198.58	1369.27	1062.48	638.564	3880.74	3.853	0.585799
sp|P97372|PSME2_MOUSE			Proteasome activator complex subunit 2 OS=Mus musculus OX=10090 GN=Psme2 PE=1 SV=4	TRUE	6.05959	0.000915736	-3.03823	3675.78	1783.72	3643.09	1742.3	208.385	588.692	1892.06	2.06074	0.314023
sp|P01027|CO3_MOUSE			Complement C3 OS=Mus musculus OX=10090 GN=C3 PE=1 SV=3	TRUE	-6.01549	0.000951568	-3.02156	45798.8	102842	47378.5	105075	14146.2	12632.3	-57043.5	0.445331	-0.351318
sp|Q9JM76|ARPC3_MOUSE			Actin-related protein 2/3 complex subunit 3 OS=Mus musculus OX=10090 GN=Arpc3 PE=1 SV=3	TRUE	5.79247	0.00115925	-2.93582	5156.35	1298.04	5396.72	1425.75	1297.25	303.077	3858.32	3.97242	0.599056
sp|Q9DCX2|ATP5H_MOUSE			ATP synthase subunit d, mitochondrial OS=Mus musculus OX=10090 GN=Atp5pd PE=1 SV=3	TRUE	5.37573	0.00170253	-2.7689	147037	67553.4	147617	67611.4	28097.2	9220.22	79483.8	2.17661	0.33778
sp|P43406|ITAV_MOUSE			Integrin alpha-V OS=Mus musculus OX=10090 GN=Itgav PE=1 SV=2	TRUE	5.31899	0.00179691	-2.74547	1618.01	451.72	1514.61	410.198	384.13	211.563	1166.29	3.58188	0.554111
sp|Q91X72|HEMO_MOUSE			Hemopexin OS=Mus musculus OX=10090 GN=Hpx PE=1 SV=2	TRUE	5.134	0.00214858	-2.66785	64176.6	8729.18	72168.7	8340.9	21483	2245.77	55447.4	7.35196	0.866403
sp|P42125|ECI1_MOUSE			Enoyl-CoA delta isomerase 1, mitochondrial OS=Mus musculus OX=10090 GN=Eci1 PE=1 SV=2	TRUE	-5.05715	0.0023172	-2.63504	43798.1	70043.6	43825.2	70177.5	9755.56	3544.63	-26245.5	0.625298	-0.203913
sp|P35278|RAB5C_MOUSE			Ras-related protein Rab-5C OS=Mus musculus OX=10090 GN=Rab5c PE=1 SV=2	TRUE	4.92776	0.00263614	-2.57903	21145.4	4986.45	19918.3	4375.7	5809.39	3043.45	16158.9	4.24057	0.627424
sp|Q9CQA3|SDHB_MOUSE			Succinate dehydrogenase [ubiquinone] iron-sulfur subunit, mitochondrial OS=Mus musculus OX=10090 GN=Sdhb PE=1 SV=1	TRUE	4.87701	0.0027746	-2.5568	17962	1232.23	18960.4	1105.83	6806.94	856.837	16729.8	14.5768	1.16366
sp|P50247|SAHH_MOUSE			Adenosylhomocysteinase OS=Mus musculus OX=10090 GN=Ahcy PE=1 SV=3	TRUE	-4.84079	0.00287846	-2.54084	16539	39913.1	15202.6	38203.2	3334.76	9063.1	-23374.1	0.414374	-0.382607
sp|P10833|RRAS_MOUSE			Ras-related protein R-Ras OS=Mus musculus OX=10090 GN=Rras PE=1 SV=1	TRUE	4.81141	0.00296595	-2.52784	3661.1	1391.68	3668.01	1427.11	821.592	463.567	2269.42	2.63071	0.420073
sp|P56391|CX6B1_MOUSE			Cytochrome c oxidase subunit 6B1 OS=Mus musculus OX=10090 GN=Cox6b1 PE=1 SV=2	TRUE	4.68373	0.00338278	-2.47073	78952.3	30508	80916.9	28554.7	10794.8	17646.3	48444.3	2.58792	0.412951
sp|P05555|ITAM_MOUSE			Integrin alpha-M OS=Mus musculus OX=10090 GN=Itgam PE=1 SV=2	TRUE	4.57992	0.00377085	-2.42356	29270.9	7754.81	32669.1	7525.13	9273.88	1508.89	21516.1	3.77454	0.576864
sp|Q9D3D9|ATPD_MOUSE			ATP synthase subunit delta, mitochondrial OS=Mus musculus OX=10090 GN=Atp5f1d PE=1 SV=1	TRUE	4.55953	0.00385283	-2.41422	45950	8936.95	49517.8	9759.7	15522.9	4757.01	37013.1	5.14158	0.711096
sp|Q9CQ60|6PGL_MOUSE			6-phosphogluconolactonase OS=Mus musculus OX=10090 GN=Pgls PE=1 SV=1	TRUE	4.55582	0.00386795	-2.41252	3368.49	833.899	3534.88	827.295	1019.58	445.561	2534.6	4.03945	0.606323
sp|Q6P069|SORCN_MOUSE			Sorcin OS=Mus musculus OX=10090 GN=Sri PE=1 SV=1	TRUE	4.52536	0.00399475	-2.39851	40210.2	12770.4	42170	12666.8	10776.2	5562.39	27439.8	3.14871	0.498133
sp|P46638|RB11B_MOUSE			Ras-related protein Rab-11B OS=Mus musculus OX=10090 GN=Rab11b PE=1 SV=3	TRUE	4.5195	0.00401972	-2.3958	82241.6	33534	82401	27717	6179.86	20649.5	48707.6	2.45249	0.389607
sp|P06745|G6PI_MOUSE			Glucose-6-phosphate isomerase OS=Mus musculus OX=10090 GN=Gpi PE=1 SV=4	TRUE	4.46702	0.00425098	-2.37151	152371	47193	161549	41142.7	44202	16240.7	105178	3.22869	0.509026
sp|Q921I1|TRFE_MOUSE			Serotransferrin OS=Mus musculus OX=10090 GN=Tf PE=1 SV=1	TRUE	4.44452	0.00435465	-2.36105	300975	67559.5	306755	70773.5	99543.4	33517.8	233415	4.45496	0.648843
sp|P24668|MPRD_MOUSE			Cation-dependent mannose-6-phosphate receptor OS=Mus musculus OX=10090 GN=M6pr PE=1 SV=1	TRUE	4.36418	0.00474891	-2.32341	8488.58	2581.48	8764.41	1943.97	1733.44	2079.3	5907.11	3.28826	0.516967
sp|P21956|MFGM_MOUSE			Lactadherin OS=Mus musculus OX=10090 GN=Mfge8 PE=1 SV=3	TRUE	4.34782	0.00483404	-2.31569	80583.3	28075.2	80368.7	27901	21553.9	10901.2	52508.1	2.87027	0.457922
sp|Q61792|LASP1_MOUSE			LIM and SH3 domain protein 1 OS=Mus musculus OX=10090 GN=Lasp1 PE=1 SV=1	TRUE	4.30829	0.00504682	-2.29698	17267.4	5273.02	17085.3	5060.59	4810.77	2803.49	11994.4	3.27467	0.515168
sp|P16294|FA9_MOUSE			Coagulation factor IX OS=Mus musculus OX=10090 GN=F9 PE=2 SV=3	TRUE	4.301	0.0050872	-2.29352	1399.22	413.773	1479.33	418.702	456.015	45.1203	985.449	3.38162	0.529124
sp|Q61171|PRDX2_MOUSE			Peroxiredoxin-2 OS=Mus musculus OX=10090 GN=Prdx2 PE=1 SV=3	TRUE	4.2935	0.00512915	-2.28995	105682	13186.1	109170	12840	41715.7	10781.4	92495.8	8.01466	0.903885
sp|P27005|S10A8_MOUSE			Protein S100-A8 OS=Mus musculus OX=10090 GN=S100a8 PE=1 SV=3	TRUE	4.12853	0.00615711	-2.21062	2046.23	701.511	2089.14	750.031	543.032	359.824	1344.72	2.91689	0.464919
sp|Q9DBX3|SUSD2_MOUSE			Sushi domain-containing protein 2 OS=Mus musculus OX=10090 GN=Susd2 PE=1 SV=1	TRUE	4.11513	0.00625025	-2.2041	9169.15	3502.56	10032.4	3874.24	2538.64	1067.69	5666.59	2.61784	0.417944
sp|P35700|PRDX1_MOUSE			Peroxiredoxin-1 OS=Mus musculus OX=10090 GN=Prdx1 PE=1 SV=1	TRUE	4.0263	0.00690925	-2.16057	116255	34174.6	129347	30685.7	33435.7	23333.2	82080.8	3.40181	0.53171
sp|Q9QUI0|RHOA_MOUSE			Transforming protein RhoA OS=Mus musculus OX=10090 GN=Rhoa PE=1 SV=1	TRUE	3.89303	0.00804854	-2.09428	7670.4	1731.08	8586.17	1661.01	2976.87	669.64	5939.31	4.43098	0.6465
sp|Q9QYS9|QKI_MOUSE			Protein quaking OS=Mus musculus OX=10090 GN=Qki PE=1 SV=1	TRUE	3.88992	0.00807744	-2.09273	1865.68	689.83	1883.13	590.886	416.69	438.027	1175.85	2.70456	0.432096
sp|P17563|SBP1_MOUSE			Methanethiol oxidase OS=Mus musculus OX=10090 GN=Selenbp1 PE=1 SV=2	TRUE	3.84153	0.0085437	-2.06835	23367.7	11107.6	22765.9	10581	5940.53	2335.02	12260.2	2.10377	0.322998
sp|P04117|FABP4_MOUSE			Fatty acid-binding protein, adipocyte OS=Mus musculus OX=10090 GN=Fabp4 PE=1 SV=3	TRUE	3.82428	0.00871704	-2.05963	58158.3	18521.2	55169.1	19561.4	19101.2	8052.34	39637	3.14008	0.496941
sp|P0CG50|UBC_MOUSE			Polyubiquitin-C OS=Mus musculus OX=10090 GN=Ubc PE=1 SV=2	TRUE	3.81312	0.00883131	-2.05397	202883	5133.48	248974	5313.47	103717	814.27	197750	39.5216	1.59683
sp|Q9D898|ARP5L_MOUSE			Actin-related protein 2/3 complex subunit 5-like protein OS=Mus musculus OX=10090 GN=Arpc5l PE=1 SV=1	TRUE	3.81268	0.00883592	-2.05375	4233.92	1392.65	3878.34	1376.01	1348.31	635.173	2841.27	3.04019	0.482901
sp|P16125|LDHB_MOUSE			L-lactate dehydrogenase B chain OS=Mus musculus OX=10090 GN=Ldhb PE=1 SV=2	TRUE	3.80961	0.00886766	-2.05219	5956.02	2352.35	5558.92	2375.64	1780.55	639.437	3603.67	2.53195	0.403454
sp|P05202|AATM_MOUSE			Aspartate aminotransferase, mitochondrial OS=Mus musculus OX=10090 GN=Got2 PE=1 SV=1	TRUE	3.80426	0.00892325	-2.04948	564101	71506.8	677546	71742.8	257644	26170.8	492594	7.88877	0.897009
sp|P11438|LAMP1_MOUSE			Lysosome-associated membrane glycoprotein 1 OS=Mus musculus OX=10090 GN=Lamp1 PE=1 SV=2	TRUE	3.72793	0.0097605	-2.01053	22092.9	8151.7	20799.3	7021.63	6632.91	3456.09	13941.2	2.71022	0.433004
sp|Q9JKS4-6|LDB3_MOUSE			Isoform 6 of LIM domain-binding protein 3 OS=Mus musculus OX=10090 GN=Ldb3	TRUE	3.72706	0.00977049	-2.01008	5207.8	1921.81	5350.02	1933.82	1665.82	578.183	3285.98	2.70984	0.432943
sp|Q8VCF0|MAVS_MOUSE			Mitochondrial antiviral-signaling protein OS=Mus musculus OX=10090 GN=Mavs PE=1 SV=1	TRUE	3.72536	0.0097902	-2.00921	2538.4	414.032	2804.07	426.709	1137.17	86.9716	2124.37	6.13094	0.787527
sp|P22907|HEM3_MOUSE			Porphobilinogen deaminase OS=Mus musculus OX=10090 GN=Hmbs PE=1 SV=2	TRUE	3.6652	0.0105141	-1.97823	34671.1	13461.6	36137.9	12495.2	11054.1	3428.13	21209.5	2.57556	0.410871
sp|P12787|COX5A_MOUSE			Cytochrome c oxidase subunit 5A, mitochondrial OS=Mus musculus OX=10090 GN=Cox5a PE=1 SV=2	TRUE	3.65644	0.0106244	-1.97369	33454.7	5933.6	36727.1	5552.19	15007.7	1173.52	27521.1	5.63819	0.75114
sp|P28481|CO2A1_MOUSE			Collagen alpha-1(II) chain OS=Mus musculus OX=10090 GN=Col2a1 PE=1 SV=2	TRUE	3.55775	0.0119596	-1.92228	333500	153904	327668	146911	83798.4	56310.6	179596	2.16694	0.335847
sp|Q61646|HPT_MOUSE			Haptoglobin OS=Mus musculus OX=10090 GN=Hp PE=1 SV=1	TRUE	3.55289	0.0120299	-1.91974	37583.7	13888	39318.7	14312.5	13020.6	2896.18	23695.7	2.7062	0.43236
sp|P17182|ENOA_MOUSE			Alpha-enolase OS=Mus musculus OX=10090 GN=Eno1 PE=1 SV=3	TRUE	-3.55116	0.0120551	-1.91883	140793	504102	59982.1	512411	174554	106762	-363309	0.279294	-0.553938
sp|P43275|H11_MOUSE			Histone H1.1 OS=Mus musculus OX=10090 GN=H1-1 PE=1 SV=2	TRUE	3.52644	0.0124213	-1.90583	14701.5	5620.81	15430.7	4827.76	2507.93	4498.19	9080.72	2.61555	0.417564
sp|P41245|MMP9_MOUSE			Matrix metalloproteinase-9 OS=Mus musculus OX=10090 GN=Mmp9 PE=1 SV=2	TRUE	3.52392	0.0124592	-1.90451	1581.44	284.351	1535.12	273.57	733.679	60.4324	1297.09	5.56158	0.745198
sp|O88593|PGRP1_MOUSE			Peptidoglycan recognition protein 1 OS=Mus musculus OX=10090 GN=Pglyrp1 PE=1 SV=1	TRUE	3.48836	0.0130094	-1.88574	21379.7	4503.9	23135.1	4805.84	9559.35	1494.61	16875.8	4.74692	0.676412
sp|P11087|CO1A1_MOUSE			Collagen alpha-1(I) chain OS=Mus musculus OX=10090 GN=Col1a1 PE=1 SV=4	TRUE	3.44435	0.0137276	-1.86241	4.17869e+06	171529	4.19477e+06	182515	2.32585e+06	66324.5	4.00716e+06	24.3614	1.3867
sp|Q9ES97-3|RTN3_MOUSE			Isoform 3 of Reticulon-3 OS=Mus musculus OX=10090 GN=Rtn3	TRUE	3.43129	0.0139491	-1.85545	14904.6	2796.51	17639.4	2953.06	6887.87	1537.95	12108.1	5.32973	0.726706
sp|Q9QUP5|HPLN1_MOUSE			Hyaluronan and proteoglycan link protein 1 OS=Mus musculus OX=10090 GN=Hapln1 PE=1 SV=1	TRUE	3.43068	0.0139595	-1.85513	57700.3	33397	55680.6	31830.6	4808.17	13327.4	24303.3	1.72771	0.23747
sp|Q61738-5|ITA7_MOUSE			Isoform Alpha-7X2B of Integrin alpha-7 OS=Mus musculus OX=10090 GN=Itga7	TRUE	3.42818	0.0140024	-1.8538	24788	12608.5	25779	11953.6	6893.14	1724.27	12179.5	1.96598	0.293579
sp|P29699|FETUA_MOUSE			Alpha-2-HS-glycoprotein OS=Mus musculus OX=10090 GN=Ahsg PE=1 SV=1	TRUE	3.41579	0.014217	-1.84719	515577	217302	541015	195016	109153	136332	298275	2.37263	0.37523
sp|Q9D6R2|IDH3A_MOUSE			Isocitrate dehydrogenase [NAD] subunit alpha, mitochondrial OS=Mus musculus OX=10090 GN=Idh3a PE=1 SV=1	TRUE	3.40701	0.0143715	-1.8425	164472	47992.8	183943	41708.9	65249.1	20442.6	116480	3.42702	0.534917
sp|Q9EPW4|CLC3A_MOUSE			C-type lectin domain family 3 member A OS=Mus musculus OX=10090 GN=Clec3a PE=3 SV=1	TRUE	3.40378	0.0144286	-1.84077	5702.05	2511.96	6037.51	2660.11	1797.93	530.077	3190.09	2.26996	0.356018
sp|P08207|S10AA_MOUSE			Protein S100-A10 OS=Mus musculus OX=10090 GN=S100a10 PE=1 SV=2	TRUE	3.40007	0.0144947	-1.83879	9689.23	2677.02	10036.3	2582.68	4088.41	546.257	7012.21	3.6194	0.558637
sp|P62897|CYC_MOUSE			Cytochrome c, somatic OS=Mus musculus OX=10090 GN=Cycs PE=1 SV=2	TRUE	3.3489	0.0154403	-1.81134	81149.2	16389.4	89618.2	17560	38535.4	3285.69	64759.8	4.95131	0.694721
sp|P10639|THIO_MOUSE			Thioredoxin OS=Mus musculus OX=10090 GN=Txn PE=1 SV=3	TRUE	3.33711	0.0156677	-1.80499	51742.1	10915	45898.3	10872.5	23901.2	5238.22	40827.1	4.74046	0.67582
sp|P15864|H12_MOUSE			Histone H1.2 OS=Mus musculus OX=10090 GN=H1-2 PE=1 SV=2	TRUE	3.32915	0.0158235	-1.8007	18664.1	1267.61	23133	1131.94	10415	867.414	17396.5	14.7239	1.16802
sp|P08228|SODC_MOUSE			Superoxide dismutase [Cu-Zn] OS=Mus musculus OX=10090 GN=Sod1 PE=1 SV=2	TRUE	3.31981	0.0160082	-1.79566	64278.5	6535.02	71607.5	6726.89	34742.3	1767.37	57743.5	9.83601	0.992819
sp|Q9QUH0|GLRX1_MOUSE			Glutaredoxin-1 OS=Mus musculus OX=10090 GN=Glrx PE=1 SV=3	TRUE	-3.31957	0.016013	-1.79553	3122.52	4607.46	3197.84	4564.6	683.482	577.293	-1484.94	0.67771	-0.168956
sp|Q64739-7|COBA2_MOUSE			Isoform 6 of Collagen alpha-2(XI) chain OS=Mus musculus OX=10090 GN=Col11a2	TRUE	3.31536	0.016097	-1.79325	54348.9	5062.3	60093	4863.13	29485.6	3821.64	49286.6	10.736	1.03084
sp|P60335|PCBP1_MOUSE			Poly(rC)-binding protein 1 OS=Mus musculus OX=10090 GN=Pcbp1 PE=1 SV=1	TRUE	-3.31431	0.0161181	-1.79269	66768.9	152857	46508.5	149229	43048.2	29079.1	-86088.2	0.436806	-0.359711
sp|Q9ERS2|NDUAD_MOUSE			NADH dehydrogenase [ubiquinone] 1 alpha subcomplex subunit 13 OS=Mus musculus OX=10090 GN=Ndufa13 PE=1 SV=3	TRUE	3.2912	0.0165889	-1.78018	19853.1	2428.53	22411	2301.04	10553.1	866.015	17424.6	8.17494	0.912485
sp|P40124|CAP1_MOUSE			Adenylyl cyclase-associated protein 1 OS=Mus musculus OX=10090 GN=Cap1 PE=1 SV=4	TRUE	3.25851	0.0172809	-1.76243	51043.3	16420.2	43256.4	15785.6	20950	3563.53	34623.2	3.10858	0.492561
sp|Q9JK53|PRELP_MOUSE			Prolargin OS=Mus musculus OX=10090 GN=Prelp PE=1 SV=2	TRUE	3.25484	0.0173607	-1.76043	376039	24605.5	473294	24510.4	215810	7642.95	351433	15.2827	1.1842
sp|P51885|LUM_MOUSE			Lumican OS=Mus musculus OX=10090 GN=Lum PE=1 SV=2	TRUE	3.2501	0.0174641	-1.75785	361818	17426.5	427814	18528.7	211894	3685.37	344391	20.7626	1.31728
sp|P43023|CX6A2_MOUSE			Cytochrome c oxidase subunit 6A2, mitochondrial OS=Mus musculus OX=10090 GN=Cox6a2 PE=1 SV=2	TRUE	3.24163	0.0176508	-1.75324	8894.4	1733.13	9521.02	1617.01	4310.37	970.662	7161.26	5.13197	0.710284
sp|P26883|FKB1A_MOUSE			Peptidyl-prolyl cis-trans isomerase FKBP1A OS=Mus musculus OX=10090 GN=Fkbp1a PE=1 SV=2	TRUE	3.24158	0.0176519	-1.75321	19701	8122.9	20332.7	5771.91	4838.95	5254.94	11578.1	2.42537	0.384778
sp|Q9R1Q7|PLP2_MOUSE			Proteolipid protein 2 OS=Mus musculus OX=10090 GN=Plp2 PE=1 SV=1	TRUE	3.24057	0.0176743	-1.75266	8716.99	3433.29	9052.51	3208.55	3168.44	771.329	5283.7	2.53896	0.404656
sp|P97461|RS5_MOUSE			40S ribosomal protein S5 OS=Mus musculus OX=10090 GN=Rps5 PE=1 SV=3	TRUE	3.23222	0.0178605	-1.74811	28313.3	3038.37	33936.3	2427.01	15477.6	2243.67	25274.9	9.31858	0.96935
sp|Q9CPW4|ARPC5_MOUSE			Actin-related protein 2/3 complex subunit 5 OS=Mus musculus OX=10090 GN=Arpc5 PE=1 SV=3	TRUE	3.23206	0.0178642	-1.74802	7480.96	786.038	8515.2	780.764	4135.51	245.949	6694.92	9.5173	0.978514
sp|P16045|LEG1_MOUSE			Galectin-1 OS=Mus musculus OX=10090 GN=Lgals1 PE=1 SV=3	TRUE	3.22997	0.0179111	-1.74688	39416.8	4274.55	47316.9	4501.37	21614.9	2509.44	35142.2	9.22127	0.964791
sp|P10126|EF1A1_MOUSE			Elongation factor 1-alpha 1 OS=Mus musculus OX=10090 GN=Eef1a1 PE=1 SV=3	TRUE	3.22419	0.0180418	-1.74372	81319.1	25886.1	73881.4	18870.1	27508.7	20631.2	55433	3.14142	0.497126
sp|P34884|MIF_MOUSE			Macrophage migration inhibitory factor OS=Mus musculus OX=10090 GN=Mif PE=1 SV=2	TRUE	3.21396	0.0182756	-1.73813	28360.4	3615.56	28315.2	3592.03	15393.6	381.289	24744.9	7.84399	0.894537
sp|P07758|A1AT1_MOUSE			Alpha-1-antitrypsin 1-1 OS=Mus musculus OX=10090 GN=Serpina1a PE=1 SV=4	TRUE	3.19897	0.0186243	-1.72992	53997.5	12937.5	59775.8	13657.8	25280.4	4460	41060	4.17372	0.620523
sp|Q61245|COBA1_MOUSE			Collagen alpha-1(XI) chain OS=Mus musculus OX=10090 GN=Col11a1 PE=1 SV=2	TRUE	3.19643	0.0186841	-1.72853	68250.5	5480.66	68462.8	5902.52	39151.9	3107.1	62769.8	12.453	1.09527
sp|P97457|MLRS_MOUSE			Myosin regulatory light chain 2, skeletal muscle isoform OS=Mus musculus OX=10090 GN=Mylpf PE=1 SV=3	TRUE	3.19082	0.0188168	-1.72545	1.09566e+06	116646	1.11725e+06	124604	612167	42507.2	979010	9.393	0.972804
sp|Q91VD9|NDUS1_MOUSE			NADH-ubiquinone oxidoreductase 75 kDa subunit, mitochondrial OS=Mus musculus OX=10090 GN=Ndufs1 PE=1 SV=2	TRUE	3.14816	0.0198609	-1.702	6964.5	3320.24	6692.76	3113.36	2084.64	1007.1	3644.26	2.09759	0.32172
sp|Q61878|PRG2_MOUSE			Bone marrow proteoglycan OS=Mus musculus OX=10090 GN=Prg2 PE=1 SV=1	TRUE	3.13102	0.0202984	-1.69254	12037.6	3312.38	13057.4	3253.36	5465.95	1089.21	8725.22	3.63413	0.5604
sp|Q9D0F9|PGM1_MOUSE			Phosphoglucomutase-1 OS=Mus musculus OX=10090 GN=Pgm1 PE=1 SV=4	TRUE	3.12178	0.0205384	-1.68743	267887	139170	242073	141493	78019	26709.5	128718	1.9249	0.284407
sp|Q9WV54|ASAH1_MOUSE			Acid ceramidase OS=Mus musculus OX=10090 GN=Asah1 PE=1 SV=1	TRUE	-3.09549	0.0212384	-1.67288	10796.9	63158.6	10659.3	69121.5	2652.91	33726.8	-52361.7	0.170949	-0.767134
sp|Q9D1A2|CNDP2_MOUSE			Cytosolic non-specific dipeptidase OS=Mus musculus OX=10090 GN=Cndp2 PE=1 SV=1	TRUE	-3.08765	0.0214522	-1.66853	2861.72	10848.9	2660.72	10497.7	1503.12	4950.46	-7987.17	0.26378	-0.578758
sp|P13634|CAH1_MOUSE			Carbonic anhydrase 1 OS=Mus musculus OX=10090 GN=Ca1 PE=1 SV=4	TRUE	-3.08517	0.0215204	-1.66715	47744.8	87306.4	45915.7	84771.5	19739.5	16373.3	-39561.6	0.546865	-0.26212
sp|O88456|CPNS1_MOUSE			Calpain small subunit 1 OS=Mus musculus OX=10090 GN=Capns1 PE=1 SV=1	TRUE	3.07721	0.0217405	-1.66273	10746	3295.62	9577.09	3280.9	4320.18	2187.27	7450.41	3.2607	0.513311
sp|P17751|TPIS_MOUSE			Triosephosphate isomerase OS=Mus musculus OX=10090 GN=Tpi1 PE=1 SV=5	TRUE	3.05089	0.0224862	-1.64808	536442	32275.3	606467	28424.8	330222	13664.9	504167	16.6208	1.22065
sp|Q91WS0|CISD1_MOUSE			CDGSH iron-sulfur domain-containing protein 1 OS=Mus musculus OX=10090 GN=Cisd1 PE=1 SV=1	TRUE	3.0487	0.0225495	-1.64686	3824.61	525.514	4033.73	504.18	2150.58	243.017	3299.1	7.27785	0.862003
sp|P49935|CATH_MOUSE			Pro-cathepsin H OS=Mus musculus OX=10090 GN=Ctsh PE=1 SV=2	TRUE	3.0483	0.022561	-1.64664	8849.62	2277.22	8913.08	1991.7	4149.29	1173.94	6572.4	3.88615	0.589519
sp|P50544|ACADV_MOUSE			Very long-chain specific acyl-CoA dehydrogenase, mitochondrial OS=Mus musculus OX=10090 GN=Acadvl PE=1 SV=3	TRUE	3.04561	0.0226393	-1.64514	31257.4	9009.17	34762.8	8894.61	14337.6	2808.38	22248.2	3.46951	0.540268
sp|Q9CQQ7|AT5F1_MOUSE			ATP synthase F(0) complex subunit B1, mitochondrial OS=Mus musculus OX=10090 GN=Atp5pb PE=1 SV=1	TRUE	3.03848	0.0228474	-1.64116	2360.16	1081.58	2068.77	1070.04	834.458	109.343	1278.58	2.18214	0.338882
sp|P0DP28|CALM3_MOUSE			Calmodulin-3 OS=Mus musculus OX=10090 GN=Calm3 PE=1 SV=1	TRUE	-2.98465	0.024489	-1.61103	10008.5	60673.9	8444.09	57398.4	5588.93	33487.5	-50665.4	0.164956	-0.782633
sp|Q9CQZ5|NDUA6_MOUSE			NADH dehydrogenase [ubiquinone] 1 alpha subcomplex subunit 6 OS=Mus musculus OX=10090 GN=Ndufa6 PE=1 SV=1	TRUE	2.98183	0.0245783	-1.60945	13930.3	161.018	17442.8	193.039	9234.67	119.631	13769.3	86.514	1.93709
sp|Q9CQJ8|NDUB9_MOUSE			NADH dehydrogenase [ubiquinone] 1 beta subcomplex subunit 9 OS=Mus musculus OX=10090 GN=Ndufb9 PE=1 SV=3	TRUE	2.98016	0.0246315	-1.60851	3041.02	897.046	3340.7	652.175	1316.01	581.666	2143.97	3.39003	0.530204
sp|Q01768|NDKB_MOUSE			Nucleoside diphosphate kinase B OS=Mus musculus OX=10090 GN=Nme2 PE=1 SV=1	TRUE	2.97959	0.0246499	-1.60819	36125.2	3345.83	37553.2	3419.64	21991.9	687.405	32779.4	10.7971	1.03331
sp|Q61838|PZP_MOUSE			Pregnancy zone protein OS=Mus musculus OX=10090 GN=Pzp PE=1 SV=3	TRUE	2.94664	0.0257249	-1.58965	88144.2	15863.3	109050	17573.2	48854	4489.55	72280.9	5.55649	0.744801
sp|P31428|DPEP1_MOUSE			Dipeptidase 1 OS=Mus musculus OX=10090 GN=Dpep1 PE=1 SV=2	TRUE	2.94143	0.0258995	-1.58671	18684.7	236.385	22446.9	196.607	12543.4	98.2604	18448.3	79.0436	1.89787
sp|P16110|LEG3_MOUSE			Galectin-3 OS=Mus musculus OX=10090 GN=Lgals3 PE=1 SV=3	TRUE	2.93777	0.0260229	-1.58464	7198.58	2187.04	8251.73	2087.66	3331.72	734.84	5011.54	3.29147	0.51739
sp|P43274|H14_MOUSE			Histone H1.4 OS=Mus musculus OX=10090 GN=H1-4 PE=1 SV=2	TRUE	2.92949	0.0263046	-1.57997	51028.9	1579.38	59031.6	1591.51	33754.9	581.739	49449.5	32.3094	1.50933
sp|P99029|PRDX5_MOUSE			Peroxiredoxin-5, mitochondrial OS=Mus musculus OX=10090 GN=Prdx5 PE=1 SV=2	TRUE	2.92856	0.0263363	-1.57945	88487.7	13728.3	108149	11450.7	50808.7	5012.83	74759.4	6.44564	0.809266
sp|Q9D154|ILEUA_MOUSE			Leukocyte elastase inhibitor A OS=Mus musculus OX=10090 GN=Serpinb1a PE=1 SV=1	TRUE	2.92578	0.0264318	-1.57787	21189.2	7277.42	22450.2	7133.39	9452.47	1042.62	13911.8	2.91164	0.464137
sp|P20108|PRDX3_MOUSE			Thioredoxin-dependent peroxide reductase, mitochondrial OS=Mus musculus OX=10090 GN=Prdx3 PE=1 SV=1	TRUE	2.92303	0.0265265	-1.57632	14243.9	576.532	16950.6	627.368	9346.68	299.968	13667.3	24.7061	1.3928
sp|P11835|ITB2_MOUSE			Integrin beta-2 OS=Mus musculus OX=10090 GN=Itgb2 PE=1 SV=2	TRUE	2.92081	0.0266031	-1.57507	63224	24151.5	64956.1	26816.8	24599.8	10519.5	39072.6	2.61781	0.417939
sp|Q00623|APOA1_MOUSE			Apolipoprotein A-I OS=Mus musculus OX=10090 GN=Apoa1 PE=1 SV=2	TRUE	2.91739	0.026722	-1.57313	342573	50530.3	386019	45619.3	199131	20741.3	292043	6.77956	0.831202
sp|Q8BH95|ECHM_MOUSE			Enoyl-CoA hydratase, mitochondrial OS=Mus musculus OX=10090 GN=Echs1 PE=1 SV=1	TRUE	-2.89671	0.0274521	-1.56142	8892.54	19157	8445.86	18371	6518.17	2781.93	-10264.5	0.464192	-0.333302
sp|P62806|H4_MOUSE			Histone H4 OS=Mus musculus OX=10090 GN=H4c1 PE=1 SV=2	TRUE	2.89205	0.0276194	-1.55879	461129	20948.7	558052	19949.2	304224	10536.5	440180	22.0123	1.34267
sp|P28653|PGS1_MOUSE			Biglycan OS=Mus musculus OX=10090 GN=Bgn PE=1 SV=1	TRUE	2.88399	0.0279118	-1.55421	180166	23408.3	210401	23066.4	107673	14973.2	156758	7.69665	0.886302
sp|O35215|DOPD_MOUSE			D-dopachrome decarboxylase OS=Mus musculus OX=10090 GN=Ddt PE=1 SV=3	TRUE	2.87964	0.0280709	-1.55174	29141	0	30129.8	0	20239.3	0	29141	âˆž	âˆž
sp|P35979|RL12_MOUSE			60S ribosomal protein L12 OS=Mus musculus OX=10090 GN=Rpl12 PE=1 SV=2	TRUE	2.87631	0.0281933	-1.54985	8124.34	1268.59	9371.41	1395.55	4731.32	582.466	6855.75	6.40424	0.806467
sp|Q9JKP5|MBNL1_MOUSE			Muscleblind-like protein 1 OS=Mus musculus OX=10090 GN=Mbnl1 PE=1 SV=1	TRUE	2.87251	0.0283339	-1.54769	3478.94	1186.85	3155.03	1079.84	1485.75	582.567	2292.09	2.93123	0.46705
sp|P07309|TTHY_MOUSE			Transthyretin OS=Mus musculus OX=10090 GN=Ttr PE=1 SV=1	TRUE	2.86625	0.028567	-1.54413	36312	12762.9	37542.3	11822.8	16147.2	3046.2	23549.1	2.84513	0.454101
sp|Q8VEM8|MPCP_MOUSE			Phosphate carrier protein, mitochondrial OS=Mus musculus OX=10090 GN=Slc25a3 PE=1 SV=1	TRUE	2.8658	0.0285836	-1.54388	24231.7	11206	22382.4	11392.6	7291.05	5429.29	13025.8	2.16239	0.334935
sp|P60766|CDC42_MOUSE			Cell division control protein 42 homolog OS=Mus musculus OX=10090 GN=Cdc42 PE=1 SV=2	TRUE	2.86304	0.0286874	-1.54231	7523.72	2913.48	7569.73	2018.88	2034.74	2496.32	4610.25	2.58239	0.412021
sp|P09528|FRIH_MOUSE			Ferritin heavy chain OS=Mus musculus OX=10090 GN=Fth1 PE=1 SV=2	TRUE	2.8628	0.0286963	-1.54217	48487.2	2809.14	59201.6	2844.95	31908.9	403.277	45678	17.2605	1.23705
sp|P31725|S10A9_MOUSE			Protein S100-A9 OS=Mus musculus OX=10090 GN=S100a9 PE=1 SV=3	TRUE	2.83012	0.0299529	-1.52356	161994	9344.02	187626	7397.35	107771	4752.02	152650	17.3367	1.23897
sp|P20801|TNNC2_MOUSE			Troponin C, skeletal muscle OS=Mus musculus OX=10090 GN=Tnnc2 PE=1 SV=2	TRUE	-2.82389	0.0301991	-1.52001	26644.2	115674	2715.57	115330	49005.9	39677.4	-89029.7	0.230339	-0.637633
sp|P60867|RS20_MOUSE			40S ribosomal protein S20 OS=Mus musculus OX=10090 GN=Rps20 PE=1 SV=1	TRUE	2.81518	0.0305473	-1.51503	2877.01	1413.66	2705.09	1195.56	722.519	747.508	1463.35	2.03515	0.308596
sp|Q9ESM6|GDPD2_MOUSE			Glycerophosphoinositol inositolphosphodiesterase GDPD2 OS=Mus musculus OX=10090 GN=Gdpd2 PE=1 SV=1	TRUE	-2.81462	0.0305697	-1.51471	1171.32	67392.5	1183.28	72531.8	305.163	47054.1	-66221.2	0.0173805	-1.75994
sp|Q9DB20|ATPO_MOUSE			ATP synthase subunit O, mitochondrial OS=Mus musculus OX=10090 GN=Atp5po PE=1 SV=1	TRUE	2.80763	0.0308522	-1.51071	76518.4	11332	90703.1	11052.1	46102.9	5544.49	65186.4	6.75242	0.829459
sp|P35441|TSP1_MOUSE			Thrombospondin-1 OS=Mus musculus OX=10090 GN=Thbs1 PE=1 SV=1	TRUE	2.8066	0.0308943	-1.51012	56082.9	5355.67	72455	5055.97	35910.3	4143.72	50727.3	10.4717	1.02002
sp|P26039|TLN1_MOUSE			Talin-1 OS=Mus musculus OX=10090 GN=Tln1 PE=1 SV=2	TRUE	2.80558	0.0309359	-1.50954	59990.5	34522.9	58191.1	36858.8	6279.09	17034.5	25467.6	1.7377	0.239975
sp|Q9JIM1|S29A1_MOUSE			Equilibrative nucleoside transporter 1 OS=Mus musculus OX=10090 GN=Slc29a1 PE=1 SV=3	TRUE	2.80136	0.0311082	-1.50712	5662.86	2966.93	5007.28	2979.89	1652.19	987.345	2695.93	1.90866	0.280728
sp|Q9CZX8|RS19_MOUSE			40S ribosomal protein S19 OS=Mus musculus OX=10090 GN=Rps19 PE=1 SV=3	TRUE	2.78532	0.031773	-1.49794	90374.2	47543.3	93644.2	36817.1	9863.01	29130.2	42830.8	1.90088	0.278955
sp|Q9D172|GAL3A_MOUSE			Glutamine amidotransferase-like class 1 domain-containing protein 3A, mitochondrial OS=Mus musculus OX=10090 GN=Gatd3a PE=1 SV=1	TRUE	2.78522	0.0317775	-1.49788	69336.8	9016.27	83660.3	6465.6	42859.4	6263.95	60320.5	7.69018	0.885937
sp|Q9Z1R2|BAG6_MOUSE			Large proline-rich protein BAG6 OS=Mus musculus OX=10090 GN=Bag6 PE=1 SV=1	TRUE	2.77529	0.0321968	-1.49219	16023.3	4371.44	18245.9	4221.33	8353.15	856.122	11651.9	3.66546	0.564129
sp|Q8K2B3|SDHA_MOUSE			Succinate dehydrogenase [ubiquinone] flavoprotein subunit, mitochondrial OS=Mus musculus OX=10090 GN=Sdha PE=1 SV=1	TRUE	2.76425	0.0326701	-1.48585	25428.7	9518.45	28187.5	9489.32	11289.9	2247.86	15910.3	2.67152	0.426758
sp|P07724|ALBU_MOUSE			Albumin OS=Mus musculus OX=10090 GN=Alb PE=1 SV=3	TRUE	2.75069	0.0332613	-1.47806	5.93378e+06	215320	6.9237e+06	233664	4.1568e+06	93067.3	5.71846e+06	27.558	1.44025
sp|Q3THW5|H2AV_MOUSE			Histone H2A.V OS=Mus musculus OX=10090 GN=H2az2 PE=1 SV=3	TRUE	2.74986	0.033298	-1.47758	17231.5	1669.86	22048.2	1681.32	11302.4	597.225	15561.6	10.3191	1.01364
sp|P47754|CAZA2_MOUSE			F-actin-capping protein subunit alpha-2 OS=Mus musculus OX=10090 GN=Capza2 PE=1 SV=3	TRUE	2.74396	0.0335593	-1.47419	13321.8	5885.7	13050.6	5806.36	3449.4	4180.69	7436.13	2.26342	0.354766
sp|Q91YT0|NDUV1_MOUSE			NADH dehydrogenase [ubiquinone] flavoprotein 1, mitochondrial OS=Mus musculus OX=10090 GN=Ndufv1 PE=1 SV=1	TRUE	2.73384	0.0340123	-1.46836	14238	3622.61	12030.9	3484.91	7735.5	686.381	10615.4	3.93031	0.594426
sp|Q05793|PGBM_MOUSE			Basement membrane-specific heparan sulfate proteoglycan core protein OS=Mus musculus OX=10090 GN=Hspg2 PE=1 SV=1	TRUE	2.72088	0.0346024	-1.46089	54238.3	18962.2	52785.7	9203.09	15196.9	21009.9	35276.1	2.86034	0.456418
sp|Q9CQR6|PPP6_MOUSE			Serine/threonine-protein phosphatase 6 catalytic subunit OS=Mus musculus OX=10090 GN=Ppp6c PE=1 SV=1	TRUE	2.70925	0.0351413	-1.45418	2242.99	902.563	2283.46	954.096	951.995	269.914	1340.43	2.48513	0.395349
sp|Q6P8J7|KCRS_MOUSE			Creatine kinase S-type, mitochondrial OS=Mus musculus OX=10090 GN=Ckmt2 PE=1 SV=1	TRUE	2.70241	0.0354622	-1.45023	306554	36484.5	364621	37798.3	199830	4165.35	270070	8.40231	0.924399
sp|O70591|PFD2_MOUSE			Prefoldin subunit 2 OS=Mus musculus OX=10090 GN=Pfdn2 PE=1 SV=2	TRUE	-2.69912	0.0356179	-1.44833	65492.1	228729	14335.1	222669	105638	58914.4	-163237	0.286331	-0.543132
sp|P62270|RS18_MOUSE			40S ribosomal protein S18 OS=Mus musculus OX=10090 GN=Rps18 PE=1 SV=3	TRUE	2.69504	0.0358118	-1.44597	8778.29	2701.72	8803.3	2783.11	4363.67	1137.35	6076.57	3.24915	0.51177
sp|P48771|CX7A2_MOUSE			Cytochrome c oxidase subunit 7A2, mitochondrial OS=Mus musculus OX=10090 GN=Cox7a2 PE=1 SV=2	TRUE	2.69389	0.0358664	-1.44531	7708.41	1496.91	7162.71	1368.16	4551.28	743.152	6211.51	5.14956	0.71177
sp|Q01149|CO1A2_MOUSE			Collagen alpha-2(I) chain OS=Mus musculus OX=10090 GN=Col1a2 PE=1 SV=2	TRUE	2.69103	0.0360035	-1.44366	5.81671e+06	82792.6	6.94964e+06	86732.5	4.26146e+06	21544	5.73392e+06	70.2564	1.84669
sp|Q9D051|ODPB_MOUSE			Pyruvate dehydrogenase E1 component subunit beta, mitochondrial OS=Mus musculus OX=10090 GN=Pdhb PE=1 SV=1	TRUE	-2.68693	0.0362005	-1.44129	3777.07	9652.72	3330.63	8954.3	1404.71	4141.78	-5875.65	0.391296	-0.407495
sp|Q9CPU0|LGUL_MOUSE			Lactoylglutathione lyase OS=Mus musculus OX=10090 GN=Glo1 PE=1 SV=3	TRUE	2.68688	0.0362027	-1.44126	20693.2	4564.41	24243.9	2766.21	11061.5	4666.51	16128.7	4.53359	0.656442
sp|P56135|ATPK_MOUSE			ATP synthase subunit f, mitochondrial OS=Mus musculus OX=10090 GN=Atp5mf PE=1 SV=3	TRUE	2.67156	0.0369498	-1.43239	23080.8	1904.27	24102.7	1945.23	15841.2	619.543	21176.6	12.1206	1.08352
sp|P51667|MLRV_MOUSE			Myosin regulatory light chain 2, ventricular/cardiac muscle isoform OS=Mus musculus OX=10090 GN=Myl2 PE=1 SV=3	TRUE	2.66693	0.0371784	-1.42971	21852.8	4046.49	19800.9	3889.34	13128.8	2438.98	17806.3	5.40043	0.732429
sp|P05064|ALDOA_MOUSE			Fructose-bisphosphate aldolase A OS=Mus musculus OX=10090 GN=Aldoa PE=1 SV=2	TRUE	2.66136	0.037456	-1.42648	669726	35660.1	757025	39548.7	476067	20262	634065	18.7808	1.27371
sp|P29533|VCAM1_MOUSE			Vascular cell adhesion protein 1 OS=Mus musculus OX=10090 GN=Vcam1 PE=1 SV=1	TRUE	-2.65863	0.0375925	-1.4249	13481.1	40693.2	14995.3	41295.5	10099.3	17806.1	-27212.2	0.331285	-0.479798
sp|Q62234|MYOM1_MOUSE			Myomesin-1 OS=Mus musculus OX=10090 GN=Myom1 PE=1 SV=2	TRUE	-2.65656	0.0376969	-1.42369	4458.94	11034.8	2971.76	11222.8	4396.15	2276.58	-6575.85	0.40408	-0.393532
sp|Q9D2G2|ODO2_MOUSE			Dihydrolipoyllysine-residue succinyltransferase component of 2-oxoglutarate dehydrogenase complex, mitochondrial OS=Mus musculus OX=10090 GN=Dlst PE=1 SV=1	TRUE	2.65026	0.0380154	-1.42004	158258	17675.3	179894	17601.6	106017	3932.75	140582	8.95362	0.951999
sp|O35367|KERA_MOUSE			Keratocan OS=Mus musculus OX=10090 GN=Kera PE=2 SV=1	TRUE	2.64544	0.0382612	-1.41724	116076	9515.92	129968	8762.81	80530.8	2209.59	106560	12.1981	1.08629
sp|Q9CYZ2|TPD54_MOUSE			Tumor protein D54 OS=Mus musculus OX=10090 GN=Tpd52l2 PE=1 SV=1	TRUE	2.64444	0.0383125	-1.41666	4563.54	615.684	5489.86	644.49	2980.3	180.948	3947.86	7.41215	0.869944
sp|P61089|UBE2N_MOUSE			Ubiquitin-conjugating enzyme E2 N OS=Mus musculus OX=10090 GN=Ube2n PE=1 SV=1	TRUE	2.63693	0.0386989	-1.4123	12029.1	3058.21	10060.4	2033.64	6288.89	2597.03	8970.87	3.93337	0.594765
sp|P01837|IGKC_MOUSE			Immunoglobulin kappa constant OS=Mus musculus OX=10090 GN=Igkc PE=1 SV=2	TRUE	2.63644	0.0387242	-1.41202	24983.7	4211.33	20495.5	3590.02	15469	3003.11	20772.3	5.93249	0.773237
sp|P00329|ADH1_MOUSE			Alcohol dehydrogenase 1 OS=Mus musculus OX=10090 GN=Adh1 PE=1 SV=2	TRUE	2.63472	0.0388138	-1.41101	2232.55	464.924	2504.63	503.741	1334.68	137.952	1767.62	4.80196	0.681419
sp|O70622|RTN2_MOUSE			Reticulon-2 OS=Mus musculus OX=10090 GN=Rtn2 PE=1 SV=1	TRUE	2.63371	0.038866	-1.41043	184006	39451.3	209795	32088.7	108089	19154.3	144555	4.66413	0.668771
sp|Q9WUB3|PYGM_MOUSE			Glycogen phosphorylase, muscle form OS=Mus musculus OX=10090 GN=Pygm PE=1 SV=3	TRUE	-2.63221	0.038944	-1.40956	132746	433909	50729.5	412469	181668	139138	-301163	0.305931	-0.514376
sp|P63280|UBC9_MOUSE			SUMO-conjugating enzyme UBC9 OS=Mus musculus OX=10090 GN=Ube2i PE=1 SV=1	TRUE	2.59788	0.0407782	-1.38957	3515.87	671.169	4281.36	750.763	2170.42	292.33	2844.7	5.23843	0.719201
sp|Q91WJ8|FUBP1_MOUSE			Far upstream element-binding protein 1 OS=Mus musculus OX=10090 GN=Fubp1 PE=1 SV=1	TRUE	2.59591	0.0408861	-1.38842	2170.38	703.48	2460.8	673.895	1069.7	364.707	1466.9	3.08521	0.489284
sp|O08749|DLDH_MOUSE			Dihydrolipoyl dehydrogenase, mitochondrial OS=Mus musculus OX=10090 GN=Dld PE=1 SV=2	TRUE	2.59566	0.0408999	-1.38828	155261	80635	170188	83246.3	54811.1	17379.3	74625.8	1.92548	0.284538
sp|Q60864|STIP1_MOUSE			Stress-induced-phosphoprotein 1 OS=Mus musculus OX=10090 GN=Stip1 PE=1 SV=1	TRUE	-2.59545	0.0409114	-1.38816	3380.21	5355.52	3426.56	5040.16	967.868	1174.78	-1975.31	0.631164	-0.199858
sp|P07759|SPA3K_MOUSE			Serine protease inhibitor A3K OS=Mus musculus OX=10090 GN=Serpina3k PE=1 SV=2	TRUE	2.58815	0.0413143	-1.3839	79998.5	53012.4	83957	51358.8	12480.7	16706.4	26986.1	1.50905	0.178704
sp|P00920|CAH2_MOUSE			Carbonic anhydrase 2 OS=Mus musculus OX=10090 GN=Ca2 PE=1 SV=4	TRUE	2.58734	0.0413596	-1.38342	38860.5	12424.9	40134.2	12729.2	20240.9	2807.75	26435.7	3.12765	0.495217
sp|Q99PL5|RRBP1_MOUSE			Ribosome-binding protein 1 OS=Mus musculus OX=10090 GN=Rrbp1 PE=1 SV=2	TRUE	-2.58675	0.041392	-1.38308	49960.5	134559	25532.7	140508	54761.8	35770.5	-84599	0.371289	-0.430287
sp|Q9QXC1|FETUB_MOUSE			Fetuin-B OS=Mus musculus OX=10090 GN=Fetub PE=1 SV=1	TRUE	2.57542	0.0420272	-1.37647	4426.99	402.422	4583.37	405.568	3112.94	278.439	4024.57	11.0009	1.04143
sp|P62852|RS25_MOUSE			40S ribosomal protein S25 OS=Mus musculus OX=10090 GN=Rps25 PE=1 SV=1	TRUE	2.56649	0.0425353	-1.37125	62992.7	11543.1	69589.3	12226.5	39864.7	4276.19	51449.6	5.45719	0.736969
sp|P08249|MDHM_MOUSE			Malate dehydrogenase, mitochondrial OS=Mus musculus OX=10090 GN=Mdh2 PE=1 SV=3	TRUE	2.56612	0.0425569	-1.37103	700786	36792.1	809575	39897.2	517451	7740.87	663994	19.0472	1.27983
sp|P97300|NPTN_MOUSE			Neuroplastin OS=Mus musculus OX=10090 GN=Nptn PE=1 SV=3	TRUE	2.56029	0.0428922	-1.36762	7114.54	3133.92	6690.7	3244.91	3020.67	737.993	3980.62	2.27017	0.356059
sp|P02088|HBB1_MOUSE			Hemoglobin subunit beta-1 OS=Mus musculus OX=10090 GN=Hbb-b1 PE=1 SV=2	TRUE	2.55454	0.0432251	-1.36426	1.97972e+06	256916	2.35207e+06	224177	1.34511e+06	99929.2	1.72281e+06	7.70572	0.886813
sp|P06151|LDHA_MOUSE			L-lactate dehydrogenase A chain OS=Mus musculus OX=10090 GN=Ldha PE=1 SV=3	TRUE	2.55237	0.043352	-1.36299	416007	45926.4	440959	54577.7	288955	24474.9	370080	9.05812	0.957038
sp|O55226|CHAD_MOUSE			Chondroadherin OS=Mus musculus OX=10090 GN=Chad PE=2 SV=1	TRUE	2.53078	0.0446324	-1.35035	123310	60053.9	131607	47010.8	39946.2	30053.3	63255.7	2.05332	0.312456
sp|P50608|FMOD_MOUSE			Fibromodulin OS=Mus musculus OX=10090 GN=Fmod PE=2 SV=1	TRUE	2.52526	0.0449666	-1.34711	147749	21296.7	126530	19943.6	99711.1	9363.97	126452	6.93765	0.841212
sp|Q922Q8|LRC59_MOUSE			Leucine-rich repeat-containing protein 59 OS=Mus musculus OX=10090 GN=Lrrc59 PE=1 SV=1	TRUE	2.5241	0.0450369	-1.34643	12674.8	3840.79	11798.1	4076.22	6759.07	1819.69	8834.02	3.30005	0.518521
sp|Q9CQ54|NDUC2_MOUSE			NADH dehydrogenase [ubiquinone] 1 subunit C2 OS=Mus musculus OX=10090 GN=Ndufc2 PE=1 SV=1	TRUE	2.52221	0.0451521	-1.34532	6496.38	1844.87	4981.61	1539.84	3416.52	1389.98	4651.51	3.52132	0.546706
sp|P04247|MYG_MOUSE			Myoglobin OS=Mus musculus OX=10090 GN=Mb PE=1 SV=3	TRUE	2.51711	0.045464	-1.34233	397213	11877.3	396529	11366.1	306168	1602.96	385335	33.443	1.5243
sp|Q78IK2|ATPMK_MOUSE			ATP synthase membrane subunit K, mitochondrial OS=Mus musculus OX=10090 GN=Atp5mk PE=1 SV=1	TRUE	-2.51373	0.0456721	-1.34035	23603.1	108814	15636.9	131390	25092.2	62981.6	-85210.5	0.216913	-0.663714
sp|Q61096|PRTN3_MOUSE			Myeloblastin OS=Mus musculus OX=10090 GN=Prtn3 PE=1 SV=2	TRUE	2.50514	0.046206	-1.3353	14147.8	5788.43	16603.3	4443.05	5470.39	3822.89	8359.4	2.44416	0.388129
sp|P01942|HBA_MOUSE			Hemoglobin subunit alpha OS=Mus musculus OX=10090 GN=Hba PE=1 SV=2	TRUE	2.50434	0.0462558	-1.33483	922850	187631	1.00872e+06	208490	578282	101695	735219	4.91844	0.691827
sp|Q80X90|FLNB_MOUSE			Filamin-B OS=Mus musculus OX=10090 GN=Flnb PE=1 SV=3	TRUE	-2.4981	0.046648	-1.33117	25131.3	55291.4	21587.3	62014	17585.1	16547.4	-30160.1	0.454524	-0.342443
sp|P97298|PEDF_MOUSE			Pigment epithelium-derived factor OS=Mus musculus OX=10090 GN=Serpinf1 PE=1 SV=2	TRUE	2.49393	0.0469121	-1.32872	5680.83	615.057	4199.7	657.388	4042.8	399.417	5065.77	9.23626	0.965496
sp|Q11136|PEPD_MOUSE			Xaa-Pro dipeptidase OS=Mus musculus OX=10090 GN=Pepd PE=1 SV=3	TRUE	-2.47985	0.0478151	-1.32043	1410.33	5404.78	1681.26	6444.69	777.283	3126.35	-3994.45	0.260941	-0.583457
sp|P18242|CATD_MOUSE			Cathepsin D OS=Mus musculus OX=10090 GN=Ctsd PE=1 SV=1	TRUE	2.46301	0.0489196	-1.31052	12078.6	2194.86	11518.3	942.081	7590.8	2606.35	9883.78	5.50315	0.740611
sp|P11404|FABPH_MOUSE			Fatty acid-binding protein, heart OS=Mus musculus OX=10090 GN=Fabp3 PE=1 SV=5	TRUE	2.46238	0.0489613	-1.31015	153954	4560.49	168914	3566.83	121309	2767.68	149393	33.7581	1.52838
sp|Q01730|RSU1_MOUSE			Ras suppressor protein 1 OS=Mus musculus OX=10090 GN=Rsu1 PE=1 SV=3	TRUE	2.45875	0.0492028	-1.30801	2201.77	944.039	2471.77	1039.26	984.937	276.684	1257.73	2.33228	0.367781
sp|Q05816|FABP5_MOUSE			Fatty acid-binding protein 5 OS=Mus musculus OX=10090 GN=Fabp5 PE=1 SV=3	TRUE	2.45241	0.0496278	-1.30427	6396.03	564.261	6468.56	424.29	4731.8	478.589	5831.77	11.3352	1.05443
sp|P17742|PPIA_MOUSE			Peptidyl-prolyl cis-trans isomerase A OS=Mus musculus OX=10090 GN=Ppia PE=1 SV=2	TRUE	-2.44393	0.0502031	-1.29927	80997	184239	61035.9	197428	55301.1	63875.8	-103242	0.43963	-0.356913
sp|P10852|4F2_MOUSE			4F2 cell-surface antigen heavy chain OS=Mus musculus OX=10090 GN=Slc3a2 PE=1 SV=1	TRUE	2.43807	0.050604	-1.29581	3037.27	1170.6	3657.98	1017.47	1419.83	573.475	1866.67	2.59463	0.414075
sp|P13707|GPDA_MOUSE			Glycerol-3-phosphate dehydrogenase [NAD(+)], cytoplasmic OS=Mus musculus OX=10090 GN=Gpd1 PE=1 SV=3	TRUE	2.41848	0.0519706	-1.28424	5966.24	4005.19	6085.85	4021.38	1437.06	751.562	1961.05	1.48963	0.173078
sp|P14602|HSPB1_MOUSE			Heat shock protein beta-1 OS=Mus musculus OX=10090 GN=Hspb1 PE=1 SV=3	TRUE	2.41578	0.0521616	-1.28265	50233.5	29981.4	49067.4	26511.5	6667.59	15383.7	20252	1.67549	0.224141
sp|P21550|ENOB_MOUSE			Beta-enolase OS=Mus musculus OX=10090 GN=Eno3 PE=1 SV=3	TRUE	2.41111	0.0524948	-1.27988	184627	40796.3	211842	38023.9	118503	13829.8	143831	4.52559	0.655675
sp|P68134|ACTS_MOUSE			Actin, alpha skeletal muscle OS=Mus musculus OX=10090 GN=Acta1 PE=1 SV=1	TRUE	-2.40719	0.0527752	-1.27757	14122.5	83348.2	7364.15	79440.9	18757.1	54371.1	-69225.6	0.16944	-0.770983
sp|Q9JJW5|MYOZ2_MOUSE			Myozenin-2 OS=Mus musculus OX=10090 GN=Myoz2 PE=1 SV=1	TRUE	2.38739	0.0542191	-1.26585	4233.12	1361.83	3673.07	1497.58	2379.11	354.603	2871.29	3.10841	0.492539
sp|Q9CR68|UCRI_MOUSE			Cytochrome b-c1 complex subunit Rieske, mitochondrial OS=Mus musculus OX=10090 GN=Uqcrfs1 PE=1 SV=1	TRUE	2.37437	0.0551909	-1.25813	90967.4	59557	90067.3	53512	5666.8	25844	31410.4	1.5274	0.183953
sp|Q9D358-2|PPAC_MOUSE			Isoform 2 of Low molecular weight phosphotyrosine protein phosphatase OS=Mus musculus OX=10090 GN=Acp1	TRUE	2.35588	0.0566015	-1.24717	7571.84	1718.86	9047.98	961.477	4501.03	2104.74	5852.98	4.40516	0.643962
sp|P62311|LSM3_MOUSE			U6 snRNA-associated Sm-like protein LSm3 OS=Mus musculus OX=10090 GN=Lsm3 PE=1 SV=2	TRUE	2.34027	0.0578227	-1.2379	2194.05	1084.06	2489.78	1220.8	824.295	469.455	1109.99	2.02393	0.306195
sp|Q9WV06|ANKR2_MOUSE			Ankyrin repeat domain-containing protein 2 OS=Mus musculus OX=10090 GN=Ankrd2 PE=1 SV=3	TRUE	2.33892	0.0579296	-1.2371	3362.36	1182.8	3138.97	1098.73	1754.16	629.612	2179.56	2.84272	0.453734
sp|P05977|MYL1_MOUSE			Myosin light chain 1/3, skeletal muscle isoform OS=Mus musculus OX=10090 GN=Myl1 PE=1 SV=2	TRUE	2.33853	0.0579604	-1.23687	869665	47839.9	930866	52936.6	702371	26111	821825	18.1787	1.25956
sp|Q60994|ADIPO_MOUSE			Adiponectin OS=Mus musculus OX=10090 GN=Adipoq PE=1 SV=2	TRUE	2.33586	0.0581723	-1.23528	13799.5	3485.36	13927.8	3465.06	8829.62	164.502	10314.2	3.95929	0.597617
sp|O55023|IMPA1_MOUSE			Inositol monophosphatase 1 OS=Mus musculus OX=10090 GN=Impa1 PE=1 SV=1	TRUE	2.33507	0.0582353	-1.23481	37898.4	20512.6	39182.4	18275.1	12891.3	7453.7	17385.8	1.84757	0.2666
sp|Q99JY9|ARP3_MOUSE			Actin-related protein 3 OS=Mus musculus OX=10090 GN=Actr3 PE=1 SV=3	TRUE	2.33455	0.0582768	-1.2345	5318.6	2794.25	5150.17	2727.57	2076.03	605.769	2524.35	1.90341	0.279532
sp|Q3UVK0|ERMP1_MOUSE			Endoplasmic reticulum metallopeptidase 1 OS=Mus musculus OX=10090 GN=Ermp1 PE=1 SV=2	TRUE	2.32238	0.0592552	-1.22727	889.271	234.751	1061.55	179.298	504.069	252.249	654.52	3.78815	0.578427
sp|P21981|TGM2_MOUSE			Protein-glutamine gamma-glutamyltransferase 2 OS=Mus musculus OX=10090 GN=Tgm2 PE=1 SV=4	TRUE	2.31262	0.0600527	-1.22147	2634.1	542.142	2474.02	533.253	1777.99	334.383	2091.95	4.85869	0.686519
sp|P07310|KCRM_MOUSE			Creatine kinase M-type OS=Mus musculus OX=10090 GN=Ckm PE=1 SV=1	TRUE	2.31027	0.0602462	-1.22007	1.24558e+06	156446	1.29885e+06	136462	941706	46617.8	1.08913e+06	7.96173	0.901007
sp|P32848|PRVA_MOUSE			Parvalbumin alpha OS=Mus musculus OX=10090 GN=Pvalb PE=1 SV=3	TRUE	2.28439	0.0624223	-1.20466	90928.7	19829.4	95688.9	13184.7	59817.5	17223.9	71099.3	4.58555	0.661392
sp|O08692|NGP_MOUSE			Neutrophilic granule protein OS=Mus musculus OX=10090 GN=Ngp PE=1 SV=1	TRUE	2.28227	0.0626045	-1.20339	3153.83	1833.23	3008.37	1898.13	602.213	988.239	1320.6	1.72037	0.235621
sp|O88492|PLIN4_MOUSE			Perilipin-4 OS=Mus musculus OX=10090 GN=Plin4 PE=1 SV=2	TRUE	-2.2816	0.0626617	-1.203	885.988	2972.3	807.589	2402.81	537.588	1748.01	-2086.31	0.298082	-0.525664
sp|O08553|DPYL2_MOUSE			Dihydropyrimidinase-related protein 2 OS=Mus musculus OX=10090 GN=Dpysl2 PE=1 SV=2	TRUE	2.28031	0.0627729	-1.20223	8978.31	3616.42	9229.18	2930.45	4098.05	2306.95	5361.88	2.48265	0.394915
sp|P97447|FHL1_MOUSE			Four and a half LIM domains protein 1 OS=Mus musculus OX=10090 GN=Fhl1 PE=1 SV=3	TRUE	2.27891	0.0628936	-1.20139	212293	142292	215898	120082	20991.4	57735.9	70000.7	1.49195	0.173754
sp|Q5EBG6|HSPB6_MOUSE			Heat shock protein beta-6 OS=Mus musculus OX=10090 GN=Hspb6 PE=1 SV=1	TRUE	2.27377	0.0633393	-1.19833	27894.3	4988.02	20292.3	4858.42	20129.2	877.915	22906.3	5.59227	0.747588
sp|P09671|SODM_MOUSE			Superoxide dismutase [Mn], mitochondrial OS=Mus musculus OX=10090 GN=Sod2 PE=1 SV=3	TRUE	2.25955	0.064588	-1.18985	62626.3	27399.6	69225.4	27890.9	28778.6	11999.9	35226.7	2.28566	0.359012
sp|Q80X85|RT07_MOUSE			28S ribosomal protein S7, mitochondrial OS=Mus musculus OX=10090 GN=Mrps7 PE=1 SV=1	TRUE	2.25264	0.0652044	-1.18572	6564.73	3481.68	6994.75	4056.33	1088.07	2511.74	3083.05	1.88551	0.275428
sp|Q60605|MYL6_MOUSE			Myosin light polypeptide 6 OS=Mus musculus OX=10090 GN=Myl6 PE=1 SV=3	TRUE	2.25112	0.0653404	-1.18482	59608.2	20074.3	55183.9	20988.2	33508.6	10528.4	39533.9	2.96937	0.472665
sp|Q62351|TFR1_MOUSE			Transferrin receptor protein 1 OS=Mus musculus OX=10090 GN=Tfrc PE=1 SV=1	TRUE	-2.25068	0.0653802	-1.18455	23754	51358.8	23770.2	47868.7	3431.94	24289	-27604.8	0.46251	-0.334878
sp|Q06185|ATP5I_MOUSE			ATP synthase subunit e, mitochondrial OS=Mus musculus OX=10090 GN=Atp5me PE=1 SV=2	TRUE	2.2322	0.0670631	-1.17352	46346.8	14903.2	53308	13250.8	27767.8	4759.95	31443.6	3.10986	0.492741
sp|Q62465|VAT1_MOUSE			Synaptic vesicle membrane protein VAT-1 homolog OS=Mus musculus OX=10090 GN=Vat1 PE=1 SV=3	TRUE	2.22653	0.0675876	-1.17013	46476.2	14538.9	54410.4	14567.5	27099.5	9413.54	31937.3	3.19668	0.504699
sp|Q9WTR5|CAD13_MOUSE			Cadherin-13 OS=Mus musculus OX=10090 GN=Cdh13 PE=1 SV=2	TRUE	2.22125	0.0680807	-1.16698	11377.4	5830.91	11948.3	6381.59	4338.9	2472.7	5546.49	1.95122	0.290307
sp|Q99LI8|HGS_MOUSE			Hepatocyte growth factor-regulated tyrosine kinase substrate OS=Mus musculus OX=10090 GN=Hgs PE=1 SV=2	TRUE	2.21964	0.0682321	-1.16601	15629.8	7516.98	15911	7322.21	6078.49	4060.67	8112.84	2.07927	0.317911
sp|Q9CPP6|NDUA5_MOUSE			NADH dehydrogenase [ubiquinone] 1 alpha subcomplex subunit 5 OS=Mus musculus OX=10090 GN=Ndufa5 PE=1 SV=3	TRUE	2.1986	0.0702376	-1.15343	5241.51	543.078	4968.41	296.958	4231.94	598.313	4698.44	9.65149	0.984594
sp|P62702|RS4X_MOUSE			40S ribosomal protein S4, X isoform OS=Mus musculus OX=10090 GN=Rps4x PE=1 SV=2	TRUE	2.1968	0.0704118	-1.15235	2175.98	1056.27	2008.79	1106.28	769.106	669.068	1119.71	2.06006	0.313881
sp|Q9DCM0|ETHE1_MOUSE			Persulfide dioxygenase ETHE1, mitochondrial OS=Mus musculus OX=10090 GN=Ethe1 PE=1 SV=2	TRUE	2.19151	0.0709272	-1.14919	6971.2	4353.38	7277.96	4299.61	2183.78	968.854	2617.81	1.60133	0.204481
sp|Q99KJ8|DCTN2_MOUSE			Dynactin subunit 2 OS=Mus musculus OX=10090 GN=Dctn2 PE=1 SV=3	TRUE	-2.18457	0.0716087	-1.14503	76925.9	166364	73860.9	146303	46190.2	67609.7	-89438.2	0.462395	-0.334987
sp|O88746|TOM1_MOUSE			Target of Myb protein 1 OS=Mus musculus OX=10090 GN=Tom1 PE=1 SV=1	TRUE	2.18348	0.0717161	-1.14438	2572.46	817.548	2280.15	888.826	1575.88	316.973	1754.91	3.14655	0.497835
sp|P97426|ECP1_MOUSE			Eosinophil cationic protein 1 OS=Mus musculus OX=10090 GN=Ear1 PE=2 SV=1	TRUE	2.18193	0.0718698	-1.14345	4062.89	1247.4	3937.6	1384.83	2537.22	471.898	2815.48	3.25707	0.512828
sp|P10605|CATB_MOUSE			Cathepsin B OS=Mus musculus OX=10090 GN=Ctsb PE=1 SV=2	TRUE	-2.17735	0.0723254	-1.14071	18085.6	62825.9	13642.5	59877.3	9800.43	39910.5	-44740.3	0.287869	-0.540806
sp|Q61554|FBN1_MOUSE			Fibrillin-1 OS=Mus musculus OX=10090 GN=Fbn1 PE=1 SV=2	TRUE	2.16816	0.0732481	-1.1352	3307.98	1521.8	2896.46	1256.11	1443.55	794.298	1786.18	2.17372	0.337204
sp|P84228|H32_MOUSE			Histone H3.2 OS=Mus musculus OX=10090 GN=H3c2 PE=1 SV=2	TRUE	2.15282	0.0748144	-1.12601	43412	8200.96	40697	9185.64	32539.4	3351.66	35211.1	5.29353	0.723745
sp|P49817|CAV1_MOUSE			Caveolin-1 OS=Mus musculus OX=10090 GN=Cav1 PE=1 SV=1	TRUE	2.13548	0.0766271	-1.11562	15791.5	8100.08	14859.8	8151.77	6648.98	2771.39	7691.4	1.94955	0.289933
sp|P28665|MUG1_MOUSE			Murinoglobulin-1 OS=Mus musculus OX=10090 GN=Mug1 PE=1 SV=3	TRUE	-2.13249	0.0769447	-1.11382	95467.9	114295	95479.9	110682	15469	8514.6	-18827.2	0.835276	-0.0781702
sp|P24270|CATA_MOUSE			Catalase OS=Mus musculus OX=10090 GN=Cat PE=1 SV=4	TRUE	-2.12962	0.07725	-1.1121	1027.05	5008.96	828.82	4625.13	502.107	3705.68	-3981.9	0.205044	-0.688154
sp|Q00897|A1AT4_MOUSE			Alpha-1-antitrypsin 1-4 OS=Mus musculus OX=10090 GN=Serpina1d PE=1 SV=1	TRUE	2.1256	0.0776799	-1.10969	10964	4115.13	12858.7	3891.02	6081.32	2131.74	6848.82	2.6643	0.425583
sp|Q60854|SPB6_MOUSE			Serpin B6 OS=Mus musculus OX=10090 GN=Serpinb6 PE=1 SV=1	TRUE	-2.12496	0.0777486	-1.10931	19379.6	75370.5	18473.5	64645.6	4078.18	52540.2	-55990.9	0.257124	-0.589857
sp|P47968|RPIA_MOUSE			Ribose-5-phosphate isomerase OS=Mus musculus OX=10090 GN=Rpia PE=1 SV=2	TRUE	-2.10128	0.080335	-1.0951	5788.83	17362.9	3864.95	14460.1	4687.27	9969.26	-11574.1	0.333402	-0.477032
sp|P32020|SCP2_MOUSE			Sterol carrier protein 2 OS=Mus musculus OX=10090 GN=Scp2 PE=1 SV=3	TRUE	2.096	0.0809246	-1.09192	9183.02	4080.19	10434.3	4303.52	4468.55	1934.02	5102.83	2.25064	0.352305
sp|P62869|ELOB_MOUSE			Elongin-B OS=Mus musculus OX=10090 GN=Elob PE=1 SV=1	TRUE	2.0951	0.0810245	-1.09138	7547.19	4164.93	6804.35	4557.72	3070.66	997.886	3382.27	1.81208	0.258178
sp|P41216|ACSL1_MOUSE			Long-chain-fatty-acid--CoA ligase 1 OS=Mus musculus OX=10090 GN=Acsl1 PE=1 SV=2	TRUE	2.08219	0.082484	-1.08363	4671.77	1585.54	4191.35	997.186	2649.29	1330.01	3086.23	2.94649	0.469305
sp|P10107|ANXA1_MOUSE			Annexin A1 OS=Mus musculus OX=10090 GN=Anxa1 PE=1 SV=2	TRUE	-2.0713	0.0837367	-1.07708	34779.8	43940.7	34605.4	44423.9	5902	6588.59	-9160.86	0.791518	-0.101539
sp|P05213|TBA1B_MOUSE			Tubulin alpha-1B chain OS=Mus musculus OX=10090 GN=Tuba1b PE=1 SV=2	TRUE	-2.06965	0.0839282	-1.07609	315.676	771.315	385.56	661.401	217.027	383.103	-455.639	0.40927	-0.38799
sp|O09117-2|SYPL1_MOUSE			Isoform 2 of Synaptophysin-like protein 1 OS=Mus musculus OX=10090 GN=Sypl1	TRUE	2.0634	0.0846566	-1.07234	16349.3	7094.89	17619.1	7548.89	8813.74	1667.39	9254.44	2.30438	0.362554
sp|P84084|ARF5_MOUSE			ADP-ribosylation factor 5 OS=Mus musculus OX=10090 GN=Arf5 PE=1 SV=2	TRUE	-2.05951	0.0851145	-1.07	2275.28	4552.4	1477.61	4852.01	2047.3	835.753	-2277.11	0.499799	-0.301205
sp|Q6GSS7|H2A2A_MOUSE			Histone H2A type 2-A OS=Mus musculus OX=10090 GN=Hist2h2aa1 PE=1 SV=3	TRUE	2.05217	0.0859838	-1.06558	2004.79	970.139	1951.57	951.757	978.242	244.551	1034.65	2.06649	0.315234
sp|Q5XKE0|MYPC2_MOUSE			Myosin-binding protein C, fast-type OS=Mus musculus OX=10090 GN=Mybpc2 PE=1 SV=1	TRUE	-2.03492	0.0880621	-1.05521	70893.2	158649	45198	164554	71750.8	47862.8	-87755.6	0.446856	-0.349832
sp|P15702|LEUK_MOUSE			Leukosialin OS=Mus musculus OX=10090 GN=Spn PE=1 SV=1	TRUE	-2.01245	0.0908451	-1.0417	19731.5	42853.3	17040.6	46700.6	14430.4	17882.5	-23121.8	0.460443	-0.336824
sp|P61750|ARF4_MOUSE			ADP-ribosylation factor 4 OS=Mus musculus OX=10090 GN=Arf4 PE=1 SV=2	TRUE	-2.00981	0.0911781	-1.04011	742.984	3065.74	645.153	2860.61	458.839	2265.41	-2322.75	0.242351	-0.615556
sp|Q91VW3|SH3L3_MOUSE			SH3 domain-binding glutamic acid-rich-like protein 3 OS=Mus musculus OX=10090 GN=Sh3bgrl3 PE=1 SV=1	TRUE	2.00587	0.0916774	-1.03774	11410	2708.32	12377.4	1423.4	8134.52	3017.61	8701.67	4.21294	0.624586
sp|Q9D6J5|NDUB8_MOUSE			NADH dehydrogenase [ubiquinone] 1 beta subcomplex subunit 8, mitochondrial OS=Mus musculus OX=10090 GN=Ndufb8 PE=1 SV=1	TRUE	-2.00453	0.0918477	-1.03693	33693.4	95311.4	31123.9	101675	14904.4	59644.7	-61618	0.353509	-0.4516
sp|Q921M7|CYRIB_MOUSE			CYFIP-related Rac1 interactor B OS=Mus musculus OX=10090 GN=Cyrib PE=1 SV=1	TRUE	1.995	0.0930687	-1.0312	4413.76	1985.05	5180.78	1546.61	2035.32	1336.29	2428.71	2.2235	0.347037
sp|Q9CPQ1|COX6C_MOUSE			Cytochrome c oxidase subunit 6C OS=Mus musculus OX=10090 GN=Cox6c PE=1 SV=3	TRUE	-1.98986	0.0937348	-1.0281	1336.13	2062.49	1392.38	2204.87	371.896	628.232	-726.353	0.647827	-0.188541
sp|Q8VC88|GRAN_MOUSE			Grancalcin OS=Mus musculus OX=10090 GN=Gca PE=1 SV=1	TRUE	1.9893	0.093807	-1.02776	3494.43	942.679	2968.16	948.145	2562.55	122.551	2551.75	3.70692	0.569013
sp|P58771|TPM1_MOUSE			Tropomyosin alpha-1 chain OS=Mus musculus OX=10090 GN=Tpm1 PE=1 SV=1	TRUE	-1.98864	0.0938926	-1.02737	31545.9	77296.1	29683	91091.5	11330.3	44594.6	-45750.1	0.408118	-0.389214
sp|Q8BMF4|ODP2_MOUSE			Dihydrolipoyllysine-residue acetyltransferase component of pyruvate dehydrogenase complex, mitochondrial OS=Mus musculus OX=10090 GN=Dlat PE=1 SV=2	TRUE	1.98125	0.094859	-1.02292	16689.8	3527.07	12551.2	3747.8	13236.5	1161.24	13162.8	4.73192	0.675038
sp|Q8R2S8|CD177_MOUSE			CD177 antigen OS=Mus musculus OX=10090 GN=Cd177 PE=2 SV=1	TRUE	1.94311	0.100009	-0.999959	101387	65543.9	92589.4	59800.8	23720.4	28255.2	35842.6	1.54685	0.189448
sp|P56480|ATPB_MOUSE			ATP synthase subunit beta, mitochondrial OS=Mus musculus OX=10090 GN=Atp5f1b PE=1 SV=2	TRUE	1.94167	0.100209	-0.999092	185697	48638	170278	53667.2	140170	16830	137059	3.81794	0.581829
sp|O88668|CREG1_MOUSE			Protein CREG1 OS=Mus musculus OX=10090 GN=Creg1 PE=1 SV=1	TRUE	1.93383	0.101305	-0.994371	5241.81	2129.86	6280.04	2285.26	2933.4	1324.18	3111.95	2.46111	0.39113
sp|Q9DCW4|ETFB_MOUSE			Electron transfer flavoprotein subunit beta OS=Mus musculus OX=10090 GN=Etfb PE=1 SV=3	TRUE	1.92523	0.102519	-0.989194	46912.5	29337.5	47149.5	30022.7	10178	15157.3	17575	1.59906	0.203865
sp|P43276|H15_MOUSE			Histone H1.5 OS=Mus musculus OX=10090 GN=H1-5 PE=1 SV=2	TRUE	1.92317	0.102813	-0.987951	42080.6	1985.67	40851.8	1843.39	41695.6	306.282	40094.9	21.1922	1.32618
sp|Q64442|DHSO_MOUSE			Sorbitol dehydrogenase OS=Mus musculus OX=10090 GN=Sord PE=1 SV=3	TRUE	1.91807	0.103543	-0.984881	8662.4	5009.75	9533.45	4944.75	3367.8	1778.72	3652.65	1.72911	0.237822
sp|P14094|AT1B1_MOUSE			Sodium/potassium-transporting ATPase subunit beta-1 OS=Mus musculus OX=10090 GN=Atp1b1 PE=1 SV=1	TRUE	-1.91369	0.104174	-0.982241	8667.06	37449.5	4667.13	36673.7	10108.6	28331.3	-28782.5	0.231433	-0.635575
sp|Q3U0V1|FUBP2_MOUSE			Far upstream element-binding protein 2 OS=Mus musculus OX=10090 GN=Khsrp PE=1 SV=2	TRUE	-1.90663	0.105198	-0.977994	23605.4	74433.3	13959.8	80419.4	27081.2	45927	-50827.9	0.317136	-0.498755
sp|P51881|ADT2_MOUSE			ADP/ATP translocase 2 OS=Mus musculus OX=10090 GN=Slc25a5 PE=1 SV=3	TRUE	1.89121	0.107471	-0.968708	22183	3494.03	19318.4	2610.8	19576	2720.17	18689	6.34884	0.802694
sp|Q8BK30|NDUV3_MOUSE			NADH dehydrogenase [ubiquinone] flavoprotein 3, mitochondrial OS=Mus musculus OX=10090 GN=Ndufv3 PE=1 SV=1	TRUE	-1.88805	0.107943	-0.966805	2689.28	7351.96	2508.78	6740.74	976.105	4841.73	-4662.68	0.365791	-0.436767
sp|Q9DB77|QCR2_MOUSE			Cytochrome b-c1 complex subunit 2, mitochondrial OS=Mus musculus OX=10090 GN=Uqcrc2 PE=1 SV=1	TRUE	-1.88267	0.108752	-0.963562	29005.3	50389.2	33348.4	52742.1	12141.6	19199.6	-21383.9	0.575625	-0.23986
sp|P0DOV2|IFI4_MOUSE			Interferon-activable protein 204 OS=Mus musculus OX=10090 GN=Ifi204 PE=1 SV=1	TRUE	1.8786	0.109367	-0.961113	2585.78	536.213	2374.99	419.644	2147.29	387.735	2049.57	4.8223	0.683255
sp|P57716|NICA_MOUSE			Nicastrin OS=Mus musculus OX=10090 GN=Ncstn PE=1 SV=3	TRUE	1.86872	0.110876	-0.955164	2543.37	1104.46	2292.4	1103.69	1391.63	659.513	1438.91	2.30281	0.362259
sp|P21107|TPM3_MOUSE			Tropomyosin alpha-3 chain OS=Mus musculus OX=10090 GN=Tpm3 PE=1 SV=3	TRUE	-1.86064	0.112124	-0.9503	629.193	1795.41	438.839	2091.29	488.663	1154.4	-1166.22	0.350446	-0.455379
sp|Q9CZU6|CISY_MOUSE			Citrate synthase, mitochondrial OS=Mus musculus OX=10090 GN=Cs PE=1 SV=1	TRUE	1.85986	0.112246	-0.949828	16455.7	7338.75	12548.8	7223.14	9747.54	1050.49	9116.99	2.24231	0.350695
sp|P61022|CHP1_MOUSE			Calcineurin B homologous protein 1 OS=Mus musculus OX=10090 GN=Chp1 PE=1 SV=2	TRUE	-1.85452	0.11308	-0.946614	1481.62	2827.74	1168.45	2702.67	686.099	1279.36	-1346.12	0.523958	-0.280703
sp|Q9JLV1|BAG3_MOUSE			BAG family molecular chaperone regulator 3 OS=Mus musculus OX=10090 GN=Bag3 PE=1 SV=2	TRUE	-1.84361	0.114802	-0.940052	20035.3	62567.6	19176.1	48037.3	4097.87	45957.7	-42532.2	0.320219	-0.494553
sp|O09044|SNP23_MOUSE			Synaptosomal-associated protein 23 OS=Mus musculus OX=10090 GN=Snap23 PE=1 SV=1	TRUE	-1.84161	0.115122	-0.938842	6104.99	28985.7	4181.07	27705.7	5567.52	24216.9	-22880.7	0.210621	-0.676498
sp|P14115|RL27A_MOUSE			60S ribosomal protein L27a OS=Mus musculus OX=10090 GN=Rpl27a PE=1 SV=5	TRUE	1.83068	0.116877	-0.932269	4674.84	954.757	4023.18	627.81	3968.57	876.222	3720.08	4.89637	0.689874
sp|Q8VEK0|CC50A_MOUSE			Cell cycle control protein 50A OS=Mus musculus OX=10090 GN=Tmem30a PE=1 SV=1	TRUE	1.82423	0.117928	-0.928384	858.7	341.17	644.853	344.254	564.628	55.9785	517.53	2.51693	0.40087
sp|P02535|K1C10_MOUSE			Keratin, type I cytoskeletal 10 OS=Mus musculus OX=10090 GN=Krt10 PE=1 SV=3	TRUE	-1.82246	0.118216	-0.927322	12340.4	24348.1	8965.33	22545.3	9154.05	9478.85	-12007.7	0.506832	-0.295136
sp|P48962|ADT1_MOUSE			ADP/ATP translocase 1 OS=Mus musculus OX=10090 GN=Slc25a4 PE=1 SV=4	TRUE	1.81136	0.120049	-0.920643	64285	17089.4	49312.8	17950	51985.3	3613.69	47195.6	3.7617	0.575384
sp|P28293|CATG_MOUSE			Cathepsin G OS=Mus musculus OX=10090 GN=Ctsg PE=1 SV=2	TRUE	1.80536	0.12105	-0.917036	4451.71	1570.87	4434.19	1009	2861.05	1414.08	2880.85	2.83392	0.452388
sp|P11672|NGAL_MOUSE			Neutrophil gelatinase-associated lipocalin OS=Mus musculus OX=10090 GN=Lcn2 PE=1 SV=1	TRUE	1.80287	0.121469	-0.915533	32797.7	17101.7	28990.6	20197.5	15613.3	7707.86	15696	1.9178	0.282804
sp|Q9DBJ1|PGAM1_MOUSE			Phosphoglycerate mutase 1 OS=Mus musculus OX=10090 GN=Pgam1 PE=1 SV=3	TRUE	1.79963	0.122015	-0.913587	6598.72	1892.37	7640.81	784.631	4588.36	2510.68	4706.35	3.48702	0.542454
sp|O09164|SODE_MOUSE			Extracellular superoxide dismutase [Cu-Zn] OS=Mus musculus OX=10090 GN=Sod3 PE=1 SV=1	TRUE	1.7952	0.122767	-0.91092	1668.49	797.596	1574.46	884.789	798.621	550.989	870.894	2.0919	0.320541
sp|Q08857|CD36_MOUSE			Platelet glycoprotein 4 OS=Mus musculus OX=10090 GN=Cd36 PE=1 SV=2	TRUE	1.79448	0.122888	-0.910489	75288.5	33774.2	57536.9	34304.3	43557.3	15606.7	41514.2	2.22917	0.348143
sp|Q8R429|AT2A1_MOUSE			Sarcoplasmic/endoplasmic reticulum calcium ATPase 1 OS=Mus musculus OX=10090 GN=Atp2a1 PE=1 SV=1	TRUE	1.78691	0.124183	-0.905939	363773	93445.7	262345	97426.9	301343	27150.2	270327	3.89288	0.590271
sp|Q60932|VDAC1_MOUSE			Voltage-dependent anion-selective channel protein 1 OS=Mus musculus OX=10090 GN=Vdac1 PE=1 SV=3	TRUE	1.7856	0.124408	-0.905151	99734.4	61704.1	83795.7	60211.3	38754.2	17680	38030.2	1.61633	0.208531
sp|Q64735|CR1L_MOUSE			Complement component receptor 1-like protein OS=Mus musculus OX=10090 GN=Cr1l PE=1 SV=1	TRUE	-1.78523	0.124473	-0.904925	1347.88	2052.77	1358.12	2037.17	766.157	191.351	-704.888	0.656616	-0.182688
sp|Q9D855|QCR7_MOUSE			Cytochrome b-c1 complex subunit 7 OS=Mus musculus OX=10090 GN=Uqcrb PE=1 SV=3	TRUE	1.78173	0.125077	-0.902822	26781	16640.8	26099.5	14189	4782.61	10329	10140.2	1.60936	0.206654
sp|P09055|ITB1_MOUSE			Integrin beta-1 OS=Mus musculus OX=10090 GN=Itgb1 PE=1 SV=1	TRUE	1.77636	0.12601	-0.899596	74281.4	42532.9	69486.2	28224.1	17149	31363.4	31748.6	1.74645	0.242156
sp|P19536|COX5B_MOUSE			Cytochrome c oxidase subunit 5B, mitochondrial OS=Mus musculus OX=10090 GN=Cox5b PE=1 SV=1	TRUE	-1.73555	0.133329	-0.875076	43273.9	83288.1	24375.3	84718	41237.6	20633	-40014.3	0.519568	-0.284357
sp|Q9WV55|VAPA_MOUSE			Vesicle-associated membrane protein-associated protein A OS=Mus musculus OX=10090 GN=Vapa PE=1 SV=2	TRUE	1.72089	0.136058	-0.866276	2188.03	1204.33	2187.48	1231.16	1122.49	216.895	983.702	1.8168	0.259308
sp|Q9QZ47|TNNT3_MOUSE			Troponin T, fast skeletal muscle OS=Mus musculus OX=10090 GN=Tnnt3 PE=1 SV=3	TRUE	1.71962	0.136296	-0.865516	2450.17	970.647	2755.92	934.756	1618.67	583.873	1479.52	2.52427	0.402135
sp|P40142|TKT_MOUSE			Transketolase OS=Mus musculus OX=10090 GN=Tkt PE=1 SV=1	TRUE	1.71071	0.137983	-0.860173	312695	149599	227329	125839	180534	61356.5	163096	2.09022	0.320192
sp|Q6IFZ6|K2C1B_MOUSE			Keratin, type II cytoskeletal 1b OS=Mus musculus OX=10090 GN=Krt77 PE=1 SV=1	TRUE	-1.7064	0.138808	-0.857586	15099	29603.4	9770.52	26274.8	11449.8	12565.9	-14504.4	0.510043	-0.292393
sp|O35206|COFA1_MOUSE			Collagen alpha-1(XV) chain OS=Mus musculus OX=10090 GN=Col15a1 PE=1 SV=2	TRUE	1.70503	0.139071	-0.856765	31688.7	10947	33199.9	7237.82	22262.2	9815.73	20741.8	2.89475	0.461611
sp|Q9R0G6|COMP_MOUSE			Cartilage oligomeric matrix protein OS=Mus musculus OX=10090 GN=Comp PE=1 SV=2	TRUE	-1.69463	0.141082	-0.850529	34412.5	41652.4	31386.1	41690.4	7444.55	4193.76	-7239.9	0.826183	-0.0829239
sp|P70669|PHEX_MOUSE			Phosphate-regulating neutral endopeptidase PHEX OS=Mus musculus OX=10090 GN=Phex PE=1 SV=1	TRUE	1.6876	0.142456	-0.846318	2431.19	694.177	2017.2	482.669	2006.46	460.143	1737.01	3.50225	0.544348
sp|P09542|MYL3_MOUSE			Myosin light chain 3 OS=Mus musculus OX=10090 GN=Myl3 PE=1 SV=4	TRUE	1.68073	0.143814	-0.842199	284184	128901	310982	139348	179112	45420.5	155283	2.20467	0.343344
sp|Q99P72|RTN4_MOUSE			Reticulon-4 OS=Mus musculus OX=10090 GN=Rtn4 PE=1 SV=2	TRUE	1.67694	0.144567	-0.83993	12409	8446.67	10725.7	7966.17	4286.53	1989.49	3962.37	1.4691	0.167053
sp|P11588|MUP1_MOUSE			Major urinary protein 1 OS=Mus musculus OX=10090 GN=Mup1 PE=1 SV=1	TRUE	-1.659	0.148187	-0.82919	2737.95	5458.59	1993.32	6396.32	1537.56	2897.14	-2720.65	0.501585	-0.299655
sp|P63325|RS10_MOUSE			40S ribosomal protein S10 OS=Mus musculus OX=10090 GN=Rps10 PE=1 SV=1	TRUE	-1.65811	0.148369	-0.828658	10269.1	15875.6	8576.26	16827.8	5968.1	3179.96	-5606.42	0.646852	-0.189195
sp|P50429|ARSB_MOUSE			Arylsulfatase B OS=Mus musculus OX=10090 GN=Arsb PE=1 SV=3	TRUE	1.64157	0.151787	-0.818764	4715.32	3001.21	4635.17	2822.18	1202.63	1707.34	1714.11	1.57114	0.196215
sp|Q9DCJ5|NDUA8_MOUSE			NADH dehydrogenase [ubiquinone] 1 alpha subcomplex subunit 8 OS=Mus musculus OX=10090 GN=Ndufa8 PE=1 SV=3	TRUE	1.63465	0.153241	-0.814626	10105.2	7151.86	10016	7223.46	1949.96	3042.11	2953.33	1.41295	0.150125
sp|Q8BWT1|THIM_MOUSE			3-ketoacyl-CoA thiolase, mitochondrial OS=Mus musculus OX=10090 GN=Acaa2 PE=1 SV=3	TRUE	-1.62875	0.15449	-0.8111	39913.4	390427	39931.5	352890	7057.31	430352	-350514	0.10223	-0.990421
sp|Q64521|GPDM_MOUSE			Glycerol-3-phosphate dehydrogenase, mitochondrial OS=Mus musculus OX=10090 GN=Gpd2 PE=1 SV=2	TRUE	1.62761	0.154732	-0.810419	12622.5	7290.94	11697.8	6160.22	5217.95	3961.48	5331.52	1.73125	0.238361
sp|Q62009|POSTN_MOUSE			Periostin OS=Mus musculus OX=10090 GN=Postn PE=1 SV=2	TRUE	1.60962	0.158605	-0.799683	21891.6	11683.4	23613	12094.8	10455.5	7180.94	10208.2	1.87374	0.272709
sp|Q61576|FKB10_MOUSE			Peptidyl-prolyl cis-trans isomerase FKBP10 OS=Mus musculus OX=10090 GN=Fkbp10 PE=1 SV=2	TRUE	-1.60925	0.158687	-0.799459	11324.5	25129.3	6721.31	29276.9	11402.2	12819.8	-13804.8	0.450648	-0.346162
sp|P63158|HMGB1_MOUSE			High mobility group protein B1 OS=Mus musculus OX=10090 GN=Hmgb1 PE=1 SV=2	TRUE	1.60616	0.159362	-0.797615	5331.31	2711.33	5789.73	1992.39	2692.29	1842.54	2619.98	1.96631	0.293652
sp|P28474|ADHX_MOUSE			Alcohol dehydrogenase class-3 OS=Mus musculus OX=10090 GN=Adh5 PE=1 SV=3	TRUE	1.5948	0.161868	-0.790838	8043.82	5236.86	7488.34	5602.36	3074.04	1715.14	2806.96	1.536	0.186391
sp|P62830|RL23_MOUSE			60S ribosomal protein L23 OS=Mus musculus OX=10090 GN=Rpl23 PE=1 SV=1	TRUE	1.59455	0.161924	-0.79069	2788.77	1119.92	2434.19	1314.74	2042.65	457.211	1668.85	2.49016	0.396226
sp|Q3TTY5|K22E_MOUSE			Keratin, type II cytoskeletal 2 epidermal OS=Mus musculus OX=10090 GN=Krt2 PE=1 SV=1	TRUE	1.59338	0.162184	-0.789992	12785.9	6770.23	13915.4	6316.64	6088.27	4466.32	6015.66	1.88855	0.276127
sp|Q8QZT1|THIL_MOUSE			Acetyl-CoA acetyltransferase, mitochondrial OS=Mus musculus OX=10090 GN=Acat1 PE=1 SV=1	TRUE	1.58928	0.163099	-0.787548	27221.1	10395.2	25548.1	10471.6	21041.9	2363.36	16825.9	2.61862	0.418072
sp|P59999|ARPC4_MOUSE			Actin-related protein 2/3 complex subunit 4 OS=Mus musculus OX=10090 GN=Arpc4 PE=1 SV=3	TRUE	1.58839	0.163297	-0.787022	1743.01	683.262	1670.56	766.076	1285.67	357.198	1059.75	2.55102	0.406714
sp|Q01853|TERA_MOUSE			Transitional endoplasmic reticulum ATPase OS=Mus musculus OX=10090 GN=Vcp PE=1 SV=4	TRUE	-1.58656	0.163708	-0.78593	8584.87	23430.3	8116.28	22509.4	4747.18	18101.8	-14845.4	0.366401	-0.436043
sp|P35486|ODPA_MOUSE			Pyruvate dehydrogenase E1 component subunit alpha, somatic form, mitochondrial OS=Mus musculus OX=10090 GN=Pdha1 PE=1 SV=1	TRUE	1.57385	0.166587	-0.77836	2045	1062.46	2052.83	1054.86	1195.16	361.3	982.534	1.92477	0.284378
sp|Q02788|CO6A2_MOUSE			Collagen alpha-2(VI) chain OS=Mus musculus OX=10090 GN=Col6a2 PE=1 SV=3	TRUE	1.5709	0.167263	-0.776601	49050.3	21070.5	43219.6	22323.2	35425.1	3747.09	27979.8	2.32792	0.366967
sp|Q62523|ZYX_MOUSE			Zyxin OS=Mus musculus OX=10090 GN=Zyx PE=1 SV=2	TRUE	1.56686	0.168189	-0.774202	8877.83	4997.25	8356.37	4014.33	3267.95	3722.33	3880.58	1.77654	0.249576
sp|O35405|PLD3_MOUSE			5'-3' exonuclease PLD3 OS=Mus musculus OX=10090 GN=Pld3 PE=1 SV=1	TRUE	-1.56214	0.169282	-0.771388	7288.94	13615.1	7709.52	12323.4	5893.06	5556.22	-6326.16	0.535357	-0.271356
sp|P63017|HSP7C_MOUSE			Heat shock cognate 71 kDa protein OS=Mus musculus OX=10090 GN=Hspa8 PE=1 SV=1	TRUE	1.55936	0.169927	-0.769738	178094	89655.8	146616	90759.9	113232	6677.81	88438.2	1.98642	0.298071
sp|P97807-2|FUMH_MOUSE			Isoform Cytoplasmic of Fumarate hydratase, mitochondrial OS=Mus musculus OX=10090 GN=Fh	TRUE	1.55503	0.170938	-0.767162	114039	80254.1	96733.5	75564.8	39812	17409.9	33784.8	1.42097	0.152586
sp|P97443|SMYD1_MOUSE			Histone-lysine N-methyltransferase Smyd1 OS=Mus musculus OX=10090 GN=Smyd1 PE=1 SV=3	TRUE	-1.51481	0.180596	-0.743291	3951.34	6469.31	4604.13	5512.67	2136.09	2547.39	-2517.97	0.610783	-0.214113
sp|P62814|VATB2_MOUSE			V-type proton ATPase subunit B, brain isoform OS=Mus musculus OX=10090 GN=Atp6v1b2 PE=1 SV=1	TRUE	1.50738	0.182437	-0.738888	1833.3	1185.66	2162.17	1185.19	812.076	280.948	647.646	1.54623	0.189275
sp|O35566|CD151_MOUSE			CD151 antigen OS=Mus musculus OX=10090 GN=Cd151 PE=1 SV=2	TRUE	-1.49772	0.184855	-0.73317	936.594	1643.44	744.566	1473.76	737.916	588.582	-706.849	0.569898	-0.244203
sp|Q8BKZ9|ODPX_MOUSE			Pyruvate dehydrogenase protein X component, mitochondrial OS=Mus musculus OX=10090 GN=Pdhx PE=1 SV=1	TRUE	1.49751	0.184908	-0.733044	9416.61	2149.03	5139.29	1986.55	9694.29	481.513	7267.58	4.3818	0.641652
sp|Q921G7|ETFD_MOUSE			Electron transfer flavoprotein-ubiquinone oxidoreductase, mitochondrial OS=Mus musculus OX=10090 GN=Etfdh PE=1 SV=1	TRUE	1.49591	0.185311	-0.732099	8190.09	6516.06	8091.75	6657.14	602.086	2155.64	1674.03	1.25691	0.0993034
sp|Q8CCH2|NHLC3_MOUSE			NHL repeat-containing protein 3 OS=Mus musculus OX=10090 GN=Nhlrc3 PE=1 SV=1	TRUE	1.49484	0.185582	-0.731465	1398.34	654.841	1035.28	607.813	962.556	251.034	743.496	2.13538	0.329476
sp|P32261|ANT3_MOUSE			Antithrombin-III OS=Mus musculus OX=10090 GN=Serpinc1 PE=1 SV=1	TRUE	-1.49152	0.186421	-0.729506	3932.14	23922.5	4320.85	12568.9	1285.94	26774.4	-19990.3	0.16437	-0.784177
sp|P68040|RACK1_MOUSE			Receptor of activated protein C kinase 1 OS=Mus musculus OX=10090 GN=Rack1 PE=1 SV=3	TRUE	-1.49122	0.186497	-0.729329	2785.04	4820.32	3047.02	3977.18	972.547	2550.55	-2035.28	0.57777	-0.238245
sp|P05201|AATC_MOUSE			Aspartate aminotransferase, cytoplasmic OS=Mus musculus OX=10090 GN=Got1 PE=1 SV=3	TRUE	-1.47372	0.190992	-0.718985	314814	442499	335672	417520	108888	134798	-127685	0.711445	-0.147859
sp|P62908|RS3_MOUSE			40S ribosomal protein S3 OS=Mus musculus OX=10090 GN=Rps3 PE=1 SV=1	TRUE	1.47078	0.191757	-0.71725	5869.97	1855.72	4933.77	1822.88	5432.9	529.872	4014.25	3.16318	0.500124
sp|P52503|NDUS6_MOUSE			NADH dehydrogenase [ubiquinone] iron-sulfur protein 6, mitochondrial OS=Mus musculus OX=10090 GN=Ndufs6 PE=1 SV=2	TRUE	1.46739	0.192641	-0.715252	3572.33	2437.94	3621.26	2257.45	1110.13	1076.15	1134.38	1.4653	0.165928
sp|Q8VI36|PAXI_MOUSE			Paxillin OS=Mus musculus OX=10090 GN=Pxn PE=1 SV=1	TRUE	-1.46273	0.193864	-0.712504	548.371	1193.92	233.688	1245.89	793.96	385.658	-645.554	0.459301	-0.337903
sp|Q8K1Z0|COQ9_MOUSE			Ubiquinone biosynthesis protein COQ9, mitochondrial OS=Mus musculus OX=10090 GN=Coq9 PE=1 SV=1	TRUE	1.46124	0.194256	-0.711627	25535.3	14552.7	26019.8	15914.3	13181.2	7225.68	10982.6	1.75467	0.244196
sp|P63101|1433Z_MOUSE			14-3-3 protein zeta/delta OS=Mus musculus OX=10090 GN=Ywhaz PE=1 SV=1	TRUE	-1.45819	0.195062	-0.709827	43243.9	62795.1	39599.3	64350.8	22425.7	14702.5	-19551.1	0.688652	-0.162
sp|P11276|FINC_MOUSE			Fibronectin OS=Mus musculus OX=10090 GN=Fn1 PE=1 SV=4	TRUE	1.45419	0.196124	-0.70747	24347.6	14081.4	20647.8	10533	10392.3	9558.13	10266.2	1.72906	0.237809
sp|O08807|PRDX4_MOUSE			Peroxiredoxin-4 OS=Mus musculus OX=10090 GN=Prdx4 PE=1 SV=1	TRUE	-1.44457	0.198699	-0.701804	303.593	749.731	190.68	778.378	396.093	473.954	-446.138	0.404936	-0.392614
sp|P62858|RS28_MOUSE			40S ribosomal protein S28 OS=Mus musculus OX=10090 GN=Rps28 PE=1 SV=1	TRUE	1.43566	0.201114	-0.696558	1961.01	1232.05	2129.18	1006.91	831.935	582.359	728.96	1.59166	0.201851
sp|Q62393|TPD52_MOUSE			Tumor protein D52 OS=Mus musculus OX=10090 GN=Tpd52 PE=1 SV=2	TRUE	1.42927	0.202859	-0.692805	11487.9	7423.98	11698.5	5671.46	3985.87	4056.06	4063.93	1.54741	0.189604
sp|P63030|MPC1_MOUSE			Mitochondrial pyruvate carrier 1 OS=Mus musculus OX=10090 GN=Mpc1 PE=1 SV=1	TRUE	-1.4209	0.205168	-0.687889	7535.49	27566.8	8681.47	28574	4742.54	27793.4	-20031.3	0.273354	-0.563274
sp|Q9WVA4|TAGL2_MOUSE			Transgelin-2 OS=Mus musculus OX=10090 GN=Tagln2 PE=1 SV=4	TRUE	-1.41622	0.206472	-0.68514	121393	173916	110133	199187	29346	68121.8	-52523.1	0.697998	-0.156146
sp|P04919|B3AT_MOUSE			Band 3 anion transport protein OS=Mus musculus OX=10090 GN=Slc4a1 PE=1 SV=1	TRUE	1.41581	0.206584	-0.684902	808.654	507.257	753.465	411.594	301.583	300.53	301.397	1.59417	0.202535
sp|O35129|PHB2_MOUSE			Prohibitin-2 OS=Mus musculus OX=10090 GN=Phb2 PE=1 SV=1	TRUE	-1.41184	0.207696	-0.682571	1997.08	14898.4	1743.45	8939.32	1361.58	18225.1	-12901.3	0.134047	-0.872744
sp|P13412|TNNI2_MOUSE			Troponin I, fast skeletal muscle OS=Mus musculus OX=10090 GN=Tnni2 PE=2 SV=2	TRUE	1.40567	0.209432	-0.678956	2102.64	649.071	1795.84	350.078	1936.72	725.507	1453.57	3.23946	0.510473
sp|Q1XH17|TRI72_MOUSE			Tripartite motif-containing protein 72 OS=Mus musculus OX=10090 GN=Trim72 PE=1 SV=1	TRUE	1.39321	0.212981	-0.671659	6342.26	3068.98	6257.25	2284.56	4163.41	2178.45	3273.28	2.06657	0.31525
sp|Q8VHY0|CSPG4_MOUSE			Chondroitin sulfate proteoglycan 4 OS=Mus musculus OX=10090 GN=Cspg4 PE=1 SV=3	TRUE	1.38813	0.214445	-0.668683	4923.42	2736.56	3981.8	2623.15	2954.46	1094.87	2186.86	1.79913	0.255062
sp|Q3TJD7-2|PDLI7_MOUSE			Isoform 2 of PDZ and LIM domain protein 7 OS=Mus musculus OX=10090 GN=Pdlim7	TRUE	1.38355	0.215772	-0.666004	57074.1	21689.2	59956	19181.9	47520	18928.2	35384.9	2.63145	0.420196
sp|P12815|PDCD6_MOUSE			Programmed cell death protein 6 OS=Mus musculus OX=10090 GN=Pdcd6 PE=1 SV=2	TRUE	-1.38211	0.216191	-0.665162	1495.17	2792.39	1645.64	2826.82	526.334	1801.86	-1297.22	0.535445	-0.271285
sp|Q99KP6|PRP19_MOUSE			Pre-mRNA-processing factor 19 OS=Mus musculus OX=10090 GN=Prpf19 PE=1 SV=1	TRUE	1.36481	0.221277	-0.655064	5215.57	2949.26	4985.98	2395.18	1864.15	2748.54	2266.31	1.76843	0.247589
sp|P08905|LYZ2_MOUSE			Lysozyme C-2 OS=Mus musculus OX=10090 GN=Lyz2 PE=1 SV=2	TRUE	1.35878	0.223074	-0.651551	114583	58976.1	110441	38737.6	49729.9	65007.4	55606.5	1.94287	0.288443
sp|Q9CQE1|NPS3B_MOUSE			Protein NipSnap homolog 3B OS=Mus musculus OX=10090 GN=Nipsnap3b PE=1 SV=1	TRUE	1.35234	0.225009	-0.647801	1062.37	611.552	1186.37	498.657	482.717	459.884	450.814	1.73716	0.239841
sp|Q06138|CAB39_MOUSE			Calcium-binding protein 39 OS=Mus musculus OX=10090 GN=Cab39 PE=1 SV=2	TRUE	-1.35201	0.225108	-0.647608	147.651	438.684	80.873	277.121	191.339	385.661	-291.032	0.336578	-0.472914
sp|Q61207|SAP_MOUSE			Prosaposin OS=Mus musculus OX=10090 GN=Psap PE=1 SV=2	TRUE	1.35064	0.225523	-0.64681	4272.99	2267.8	5075.5	2178.24	2841.35	862.074	2005.19	1.8842	0.275127
sp|P23927|CRYAB_MOUSE			Alpha-crystallin B chain OS=Mus musculus OX=10090 GN=Cryab PE=1 SV=2	TRUE	-1.34329	0.227755	-0.642532	109468	271905	35137.7	312065	155320	185383	-162437	0.402596	-0.395131
sp|Q9Z2Y8|PLPHP_MOUSE			Pyridoxal phosphate homeostasis protein OS=Mus musculus OX=10090 GN=Plpbp PE=1 SV=1	TRUE	-1.31784	0.235638	-0.627756	1226.93	2297.97	1217.83	2363.79	949.754	1319.12	-1071.04	0.533918	-0.272526
sp|P14152|MDHC_MOUSE			Malate dehydrogenase, cytoplasmic OS=Mus musculus OX=10090 GN=Mdh1 PE=1 SV=3	TRUE	-1.31689	0.235936	-0.627206	117055	216593	100496	195902	60422.1	138571	-99537.9	0.540438	-0.267254
sp|Q9CPY7|AMPL_MOUSE			Cytosol aminopeptidase OS=Mus musculus OX=10090 GN=Lap3 PE=1 SV=3	TRUE	-1.31057	0.237932	-0.623547	5705.8	11577.2	3766.35	13700.1	6235.9	6433.92	-5871.36	0.49285	-0.307285
sp|P23953|EST1C_MOUSE			Carboxylesterase 1C OS=Mus musculus OX=10090 GN=Ces1c PE=1 SV=4	TRUE	-1.30854	0.238578	-0.62237	44569.1	70731.9	31688.5	71021.2	38819.6	9595.24	-26162.8	0.630113	-0.200581
sp|P60710|ACTB_MOUSE			Actin, cytoplasmic 1 OS=Mus musculus OX=10090 GN=Actb PE=1 SV=1	TRUE	1.3079	0.23878	-0.622002	705929	116607	303181	107007	900847	24263.8	589322	6.05392	0.782037
sp|Q9R059|FHL3_MOUSE			Four and a half LIM domains protein 3 OS=Mus musculus OX=10090 GN=Fhl3 PE=1 SV=2	TRUE	1.30666	0.239174	-0.621286	18691.4	12406.2	18132.6	10622	3636.69	8906.37	6285.2	1.50662	0.178004
sp|P01901|HA1B_MOUSE			H-2 class I histocompatibility antigen, K-B alpha chain OS=Mus musculus OX=10090 GN=H2-K1 PE=1 SV=1	TRUE	-1.30383	0.240077	-0.619649	6721.59	10961.3	5829.2	10323.8	5413.07	3604.71	-4239.73	0.61321	-0.212391
sp|Q9R0Y5|KAD1_MOUSE			Adenylate kinase isoenzyme 1 OS=Mus musculus OX=10090 GN=Ak1 PE=1 SV=1	TRUE	1.30247	0.240514	-0.61886	89520.4	53705.7	93438.7	53024.8	49106.6	24759.1	35814.7	1.66687	0.221902
sp|Q9D6U8|F162A_MOUSE			Protein FAM162A OS=Mus musculus OX=10090 GN=Fam162a PE=1 SV=1	TRUE	-1.3016	0.240793	-0.618356	5144.24	9383.17	5455.91	11149.4	2466.37	6028.42	-4238.93	0.548241	-0.261029
sp|Q9CXZ1|NDUS4_MOUSE			NADH dehydrogenase [ubiquinone] iron-sulfur protein 4, mitochondrial OS=Mus musculus OX=10090 GN=Ndufs4 PE=1 SV=3	TRUE	1.29479	0.242985	-0.614421	1263.91	649.898	1047.97	643.703	867.949	382.362	614.012	1.94478	0.288871
sp|P07214|SPRC_MOUSE			SPARC OS=Mus musculus OX=10090 GN=Sparc PE=1 SV=1	TRUE	1.28946	0.244713	-0.611343	6554.23	3588.89	5539.28	3536.66	4574.68	475.911	2965.34	1.82626	0.261562
sp|P27573|MYP0_MOUSE			Myelin protein P0 OS=Mus musculus OX=10090 GN=Mpz PE=1 SV=1	TRUE	1.2834	0.246688	-0.607853	13138.1	6868.39	15218.3	4121.73	6874.64	6942.72	6269.73	1.91284	0.281678
sp|P13020-2|GELS_MOUSE			Isoform 2 of Gelsolin OS=Mus musculus OX=10090 GN=Gsn	TRUE	1.25608	0.255782	-0.59213	106215	61948.1	131353	54963	61877.6	33753.6	44267.3	1.71459	0.234159
sp|O88569|ROA2_MOUSE			Heterogeneous nuclear ribonucleoproteins A2/B1 OS=Mus musculus OX=10090 GN=Hnrnpa2b1 PE=1 SV=2	TRUE	1.24861	0.258316	-0.587848	3616.5	1619.76	2226.07	1603.2	3165.25	458.859	1996.74	2.23274	0.348839
sp|P01869|IGH1M_MOUSE			Ig gamma-1 chain C region, membrane-bound form OS=Mus musculus OX=10090 GN=Ighg1 PE=1 SV=2	TRUE	1.24422	0.259817	-0.585332	8903.49	4784.26	7899.53	4185.22	6144.12	2468.27	4119.24	1.861	0.269746
sp|P21460|CYTC_MOUSE			Cystatin-C OS=Mus musculus OX=10090 GN=Cst3 PE=1 SV=2	TRUE	-1.23899	0.261618	-0.582333	5588.06	10749	5673.91	12791.1	2971.25	7783.04	-5160.95	0.519867	-0.284107
sp|Q60870|REEP5_MOUSE			Receptor expression-enhancing protein 5 OS=Mus musculus OX=10090 GN=Reep5 PE=1 SV=1	TRUE	1.23314	0.263642	-0.578986	10577.5	6962.17	10115.8	7229.21	5821.46	701.312	3615.28	1.51928	0.181636
sp|O35459|ECH1_MOUSE			Delta(3,5)-Delta(2,4)-dienoyl-CoA isomerase, mitochondrial OS=Mus musculus OX=10090 GN=Ech1 PE=1 SV=1	TRUE	1.22678	0.265856	-0.575354	22373.5	8860.34	22221.2	1029.43	15181.9	15963.7	13513.1	2.52513	0.402283
sp|P18760|COF1_MOUSE			Cofilin-1 OS=Mus musculus OX=10090 GN=Cfl1 PE=1 SV=3	TRUE	1.22626	0.26604	-0.575052	50980.4	29504.7	36364.8	30785	31407.6	15505.1	21475.6	1.72787	0.237511
sp|Q99K41|EMIL1_MOUSE			EMILIN-1 OS=Mus musculus OX=10090 GN=Emilin1 PE=1 SV=1	TRUE	1.21646	0.269487	-0.569463	1663.49	1210.88	1634.69	1136.38	543.53	508.257	452.612	1.37379	0.13792
sp|P49300|CLC10_MOUSE			C-type lectin domain family 10 member A OS=Mus musculus OX=10090 GN=Clec10a PE=1 SV=1	TRUE	-1.21464	0.270134	-0.568421	8312.89	32117.5	9817.66	25215.4	5825.05	38761	-23804.6	0.258827	-0.58699
sp|P14901|HMOX1_MOUSE			Heme oxygenase 1 OS=Mus musculus OX=10090 GN=Hmox1 PE=1 SV=1	TRUE	1.21453	0.27017	-0.568363	9253.75	6659.61	8312.53	5250.12	2331.03	3579.78	2594.14	1.38953	0.142869
sp|O70209|PDLI3_MOUSE			PDZ and LIM domain protein 3 OS=Mus musculus OX=10090 GN=Pdlim3 PE=1 SV=1	TRUE	-1.21356	0.270516	-0.567807	9406.43	17053.9	7752.62	13758.2	5130.96	11511.6	-7647.46	0.551571	-0.258399
sp|P70402|MYBPH_MOUSE			Myosin-binding protein H OS=Mus musculus OX=10090 GN=Mybph PE=2 SV=2	TRUE	-1.20869	0.272249	-0.565034	529.79	1114.62	513.964	743.206	139.387	957.613	-584.828	0.475311	-0.323022
sp|Q62318|TIF1B_MOUSE			Transcription intermediary factor 1-beta OS=Mus musculus OX=10090 GN=Trim28 PE=1 SV=3	TRUE	-1.20594	0.273232	-0.563468	53090.1	111153	38103.3	107121	35993.7	89314.1	-58062.5	0.477632	-0.320906
sp|Q7TQ48-1|SRCA_MOUSE			Isoform 2 of Sarcalumenin OS=Mus musculus OX=10090 GN=Srl	TRUE	-1.20352	0.274099	-0.562092	22237.8	31089.7	18887.4	31634.2	12297.4	8072.03	-8851.92	0.715278	-0.145525
sp|P29391|FRIL1_MOUSE			Ferritin light chain 1 OS=Mus musculus OX=10090 GN=Ftl1 PE=1 SV=2	TRUE	-1.19922	0.275648	-0.559645	207849	357424	208620	347336	68338.8	239912	-149576	0.581518	-0.235437
sp|P17047|LAMP2_MOUSE			Lysosome-associated membrane glycoprotein 2 OS=Mus musculus OX=10090 GN=Lamp2 PE=1 SV=2	TRUE	1.19654	0.276618	-0.558119	18244.9	10243.2	18688.9	9944.91	10265.7	8573.48	8001.79	1.78118	0.250709
sp|Q3U962|CO5A2_MOUSE			Collagen alpha-2(V) chain OS=Mus musculus OX=10090 GN=Col5a2 PE=1 SV=1	TRUE	1.19594	0.276836	-0.557778	31499.3	13595.5	26358.4	6047.46	24402.2	17349.3	17903.8	2.31689	0.364906
sp|Q9D0E1|HNRPM_MOUSE			Heterogeneous nuclear ribonucleoprotein M OS=Mus musculus OX=10090 GN=Hnrnpm PE=1 SV=3	TRUE	-1.18859	0.279507	-0.553607	17422.4	29079.3	15574.7	34131.8	12548.4	15075.4	-11656.8	0.599136	-0.222475
sp|P01899|HA11_MOUSE			H-2 class I histocompatibility antigen, D-B alpha chain OS=Mus musculus OX=10090 GN=H2-D1 PE=1 SV=2	TRUE	-1.1817	0.282034	-0.549698	7990.31	21359.7	3907.98	14066.9	9580.95	20499	-13369.4	0.374083	-0.427032
sp|P50543|S10AB_MOUSE			Protein S100-A11 OS=Mus musculus OX=10090 GN=S100a11 PE=1 SV=1	TRUE	1.1562	0.291552	-0.535285	2419.32	1353.02	2251.38	1116.52	1625.82	871.095	1066.3	1.78809	0.252389
sp|P60904|DNJC5_MOUSE			DnaJ homolog subfamily C member 5 OS=Mus musculus OX=10090 GN=Dnajc5 PE=1 SV=1	TRUE	1.14345	0.296413	-0.528102	1559.21	1189.68	1613.17	1059.62	345.775	546.079	369.532	1.31061	0.117475
sp|P20029|BIP_MOUSE			Endoplasmic reticulum chaperone BiP OS=Mus musculus OX=10090 GN=Hspa5 PE=1 SV=3	TRUE	-1.13628	0.299179	-0.524068	158967	331492	25876.2	370503	276221	126156	-172524	0.479552	-0.319165
sp|Q63829|COMD3_MOUSE			COMM domain-containing protein 3 OS=Mus musculus OX=10090 GN=Commd3 PE=1 SV=1	TRUE	1.13103	0.301214	-0.521125	2186.24	1342.79	2572.47	1452.88	1162.8	934.018	843.455	1.62814	0.211691
sp|P20065|TYB4_MOUSE			Thymosin beta-4 OS=Mus musculus OX=10090 GN=Tmsb4x PE=1 SV=1	TRUE	1.13056	0.301396	-0.520862	3589.45	2253.94	3028.27	2374.73	1982.73	1284.72	1335.52	1.59253	0.202087
sp|P63330|PP2AA_MOUSE			Serine/threonine-protein phosphatase 2A catalytic subunit alpha isoform OS=Mus musculus OX=10090 GN=Ppp2ca PE=1 SV=1	TRUE	1.13025	0.301517	-0.520688	19355.6	10575	24019.3	8890.25	11903.5	9985.99	8780.64	1.83032	0.262527
sp|P42932|TCPQ_MOUSE			T-complex protein 1 subunit theta OS=Mus musculus OX=10090 GN=Cct8 PE=1 SV=3	TRUE	-1.12692	0.302817	-0.518819	936.548	1205.54	875.208	1215.71	461.904	120.613	-268.992	0.77687	-0.109651
sp|O88342|WDR1_MOUSE			WD repeat-containing protein 1 OS=Mus musculus OX=10090 GN=Wdr1 PE=1 SV=3	TRUE	1.12372	0.304072	-0.517024	76134.5	43618.9	74559.1	23638.3	33029.3	47520.2	32515.6	1.74545	0.241907
sp|P40237|CD82_MOUSE			CD82 antigen OS=Mus musculus OX=10090 GN=Cd82 PE=1 SV=1	TRUE	1.11431	0.30778	-0.511759	5935.36	3169.29	4975.64	2969.45	4816.56	1203.46	2766.07	1.87277	0.272486
sp|P47757-2|CAPZB_MOUSE			Isoform 2 of F-actin-capping protein subunit beta OS=Mus musculus OX=10090 GN=Capzb	TRUE	1.10968	0.309622	-0.509169	11047.2	6906.75	8037.15	7534.49	7344.22	1323.05	4140.45	1.59948	0.203979
sp|Q8BMS1|ECHA_MOUSE			Trifunctional enzyme subunit alpha, mitochondrial OS=Mus musculus OX=10090 GN=Hadha PE=1 SV=1	TRUE	1.10799	0.310296	-0.508224	8474.83	5336.39	7990.52	5485.36	5350.08	1862.85	3138.44	1.58812	0.200883
sp|Q91VR2|ATPG_MOUSE			ATP synthase subunit gamma, mitochondrial OS=Mus musculus OX=10090 GN=Atp5f1c PE=1 SV=1	TRUE	1.10701	0.310687	-0.507676	7568.88	5653.97	7978.48	5703.76	3382.81	724.968	1914.91	1.33868	0.126678
sp|O55101|SNG2_MOUSE			Synaptogyrin-2 OS=Mus musculus OX=10090 GN=Syngr2 PE=2 SV=1	TRUE	1.07555	0.323465	-0.490172	11517	6440.01	11577.9	5429.05	7607.55	5590.39	5076.98	1.78835	0.252452
sp|Q64727|VINC_MOUSE			Vinculin OS=Mus musculus OX=10090 GN=Vcl PE=1 SV=4	TRUE	1.07252	0.324719	-0.488492	160298	120483	132800	110948	60936.2	42418.9	39815.4	1.33047	0.124004
sp|O35744|CHIL3_MOUSE			Chitinase-like protein 3 OS=Mus musculus OX=10090 GN=Chil3 PE=1 SV=2	TRUE	1.06694	0.327035	-0.485405	198913	156544	202592	143314	15203.1	77952.7	42369	1.27065	0.104027
sp|O54890|ITB3_MOUSE			Integrin beta-3 OS=Mus musculus OX=10090 GN=Itgb3 PE=1 SV=2	TRUE	-1.02542	0.344718	-0.462536	22810.3	30855.5	21403	33814.4	7817.19	13605.8	-8045.23	0.739261	-0.131202
sp|Q61147|CERU_MOUSE			Ceruloplasmin OS=Mus musculus OX=10090 GN=Cp PE=1 SV=2	TRUE	-1.02389	0.345383	-0.461699	36699.9	51772.2	32715.7	50856	29182.7	3893.67	-15072.3	0.708872	-0.149432
sp|Q99PT1|GDIR1_MOUSE			Rho GDP-dissociation inhibitor 1 OS=Mus musculus OX=10090 GN=Arhgdia PE=1 SV=3	TRUE	-1.01733	0.348249	-0.45811	22048.8	36694.2	13864.7	33660.6	22811	17567.8	-14645.5	0.600879	-0.221213
sp|Q62433|NDRG1_MOUSE			Protein NDRG1 OS=Mus musculus OX=10090 GN=Ndrg1 PE=1 SV=1	TRUE	1.00755	0.352563	-0.452763	26856.9	9438.01	11895.8	8371.99	34367.4	3801.04	17418.9	2.84562	0.454176
sp|Q3MI48|JSPR1_MOUSE			Junctional sarcoplasmic reticulum protein 1 OS=Mus musculus OX=10090 GN=Jsrp1 PE=1 SV=2	TRUE	1	0.355918	-0.44865	2706.14	0	0	0	5412.28	0	2706.14	âˆž	âˆž
sp|Q61282|PGCA_MOUSE			Aggrecan core protein OS=Mus musculus OX=10090 GN=Acan PE=1 SV=2	TRUE	-0.998741	0.35648	-0.447965	73797.2	103846	54362.2	107691	49723.5	33887.2	-30048.5	0.710643	-0.148349
sp|P58389|PTPA_MOUSE			Serine/threonine-protein phosphatase 2A activator OS=Mus musculus OX=10090 GN=Ptpa PE=1 SV=1	TRUE	-0.997701	0.356945	-0.447399	686.422	975.693	699.405	871.847	409.033	411.032	-289.271	0.703523	-0.152722
sp|Q99KI0|ACON_MOUSE			Aconitate hydratase, mitochondrial OS=Mus musculus OX=10090 GN=Aco2 PE=1 SV=1	TRUE	-0.996458	0.357501	-0.446722	133236	194379	88588.1	188882	117371	35837.6	-61142.8	0.685446	-0.164027
sp|P63028|TCTP_MOUSE			Translationally-controlled tumor protein OS=Mus musculus OX=10090 GN=Tpt1 PE=1 SV=1	TRUE	0.994908	0.358196	-0.445879	25810	21730.5	25421.1	22749.3	6716.3	4705.47	4079.43	1.18773	0.0747169
sp|Q61425|HCDH_MOUSE			Hydroxyacyl-coenzyme A dehydrogenase, mitochondrial OS=Mus musculus OX=10090 GN=Hadh PE=1 SV=2	TRUE	-0.987683	0.361448	-0.441954	2205.04	3144.8	1779.79	2893.02	1372.88	1317.75	-939.761	0.70117	-0.154177
sp|Q01339|APOH_MOUSE			Beta-2-glycoprotein 1 OS=Mus musculus OX=10090 GN=Apoh PE=1 SV=1	TRUE	0.981654	0.36418	-0.438684	10209.8	6779.36	7253.16	6913.99	6760.54	1772.67	3430.43	1.50601	0.177828
sp|P82348|SGCG_MOUSE			Gamma-sarcoglycan OS=Mus musculus OX=10090 GN=Sgcg PE=1 SV=2	TRUE	-0.972464	0.368376	-0.433709	2264.14	5062.9	2311.93	2909.13	566.333	5728.09	-2798.76	0.447203	-0.349496
sp|Q6PIE5|AT1A2_MOUSE			Sodium/potassium-transporting ATPase subunit alpha-2 OS=Mus musculus OX=10090 GN=Atp1a2 PE=1 SV=1	TRUE	-0.96634	0.371193	-0.4304	6895.88	8394.05	7160.16	8147.81	764.531	3004.99	-1498.17	0.82152	-0.085382
sp|P62075|TIM13_MOUSE			Mitochondrial import inner membrane translocase subunit Tim13 OS=Mus musculus OX=10090 GN=Timm13 PE=1 SV=1	TRUE	-0.961728	0.373326	-0.427912	10057.1	18743.3	11011.9	16656.9	3814.98	17656.5	-8686.29	0.536567	-0.270376
sp|P52825|CPT2_MOUSE			Carnitine O-palmitoyltransferase 2, mitochondrial OS=Mus musculus OX=10090 GN=Cpt2 PE=1 SV=2	TRUE	-0.960739	0.373784	-0.427379	1291.49	1744.93	1183.58	1607.2	563.591	757.227	-453.441	0.740138	-0.130687
sp|Q9CR00|PSMD9_MOUSE			26S proteasome non-ATPase regulatory subunit 9 OS=Mus musculus OX=10090 GN=Psmd9 PE=1 SV=1	TRUE	-0.959406	0.374403	-0.42666	1245.71	2815.09	1261.66	1493.46	384.08	3248.93	-1569.37	0.442513	-0.354074
sp|Q9JLJ2|AL9A1_MOUSE			4-trimethylaminobutyraldehyde dehydrogenase OS=Mus musculus OX=10090 GN=Aldh9a1 PE=1 SV=1	TRUE	0.958202	0.374963	-0.426012	3800.02	2089.02	3255.75	2300.11	3308.04	1345.7	1711	1.81905	0.259844
sp|P20152|VIME_MOUSE			Vimentin OS=Mus musculus OX=10090 GN=Vim PE=1 SV=3	TRUE	-0.954711	0.376589	-0.424133	138995	416659	136605	165217	45409.8	579896	-277664	0.333594	-0.476782
sp|Q61233|PLSL_MOUSE			Plastin-2 OS=Mus musculus OX=10090 GN=Lcp1 PE=1 SV=4	TRUE	-0.943159	0.382009	-0.417926	78303.1	488275	63058.4	71528.5	34236.9	868685	-409972	0.160367	-0.794886
sp|O88844|IDHC_MOUSE			Isocitrate dehydrogenase [NADP] cytoplasmic OS=Mus musculus OX=10090 GN=Idh1 PE=1 SV=2	TRUE	0.940159	0.383427	-0.416317	23433.9	16778.5	20070	16049	10673.4	9302.31	6655.46	1.39667	0.145093
sp|Q99JI6|RAP1B_MOUSE			Ras-related protein Rap-1b OS=Mus musculus OX=10090 GN=Rap1b PE=1 SV=2	TRUE	0.91953	0.393285	-0.405293	59249.1	37802.1	75566.3	42884.7	37865.5	27243.5	21447	1.56735	0.195166
sp|P14438|HA2U_MOUSE			H-2 class II histocompatibility antigen, A-U alpha chain (Fragment) OS=Mus musculus OX=10090 GN=H2-Aa PE=1 SV=1	TRUE	-0.91887	0.393603	-0.404941	3037.26	4967.11	3142.81	3556.94	628.986	4153.12	-1929.85	0.611475	-0.213621
sp|P16546|SPTN1_MOUSE			Spectrin alpha chain, non-erythrocytic 1 OS=Mus musculus OX=10090 GN=Sptan1 PE=1 SV=4	TRUE	0.914876	0.395535	-0.402815	38856.7	28805.9	33827.8	29632.9	21412.9	4924.35	10050.8	1.34891	0.129984
sp|Q9R069|BCAM_MOUSE			Basal cell adhesion molecule OS=Mus musculus OX=10090 GN=Bcam PE=1 SV=1	TRUE	-0.913601	0.396153	-0.402137	5376.33	7029.6	5385.28	7225.76	133.61	3616.77	-1653.27	0.764813	-0.116445
sp|Q9CVB6|ARPC2_MOUSE			Actin-related protein 2/3 complex subunit 2 OS=Mus musculus OX=10090 GN=Arpc2 PE=1 SV=3	TRUE	-0.90654	0.399591	-0.398384	2347.94	3509.77	2150.08	2750.11	779.094	2441.96	-1161.84	0.668971	-0.174593
sp|P50462|CSRP3_MOUSE			Cysteine and glycine-rich protein 3 OS=Mus musculus OX=10090 GN=Csrp3 PE=1 SV=1	TRUE	-0.900702	0.402451	-0.395287	10132.8	17956.7	3980.79	20698	13047.7	11470.8	-7823.96	0.564289	-0.248499
sp|P97315|CSRP1_MOUSE			Cysteine and glycine-rich protein 1 OS=Mus musculus OX=10090 GN=Csrp1 PE=1 SV=3	TRUE	-0.891865	0.406808	-0.390611	26982.7	39188.2	16206.7	43982.1	24463	12276.7	-12205.5	0.688542	-0.16207
sp|Q9DCZ4|MIC26_MOUSE			MICOS complex subunit Mic26 OS=Mus musculus OX=10090 GN=Apoo PE=1 SV=2	TRUE	-0.8906	0.407435	-0.389942	43549.4	71289.3	28452.8	66092	34979.1	51547.3	-27739.9	0.610882	-0.214043
sp|O08532|CA2D1_MOUSE			Voltage-dependent calcium channel subunit alpha-2/delta-1 OS=Mus musculus OX=10090 GN=Cacna2d1 PE=1 SV=1	TRUE	-0.884105	0.410664	-0.386514	74714	121898	32076.2	146787	90691	56288.8	-47184.4	0.61292	-0.212596
sp|P14869|RLA0_MOUSE			60S acidic ribosomal protein P0 OS=Mus musculus OX=10090 GN=Rplp0 PE=1 SV=3	TRUE	0.880298	0.412565	-0.384507	30285.8	7825.56	6763.54	8461.7	50951.5	2805.24	22460.2	3.87011	0.587723
sp|O08677-2|KNG1_MOUSE			Isoform LMW of Kininogen-1 OS=Mus musculus OX=10090 GN=Kng1	TRUE	0.879984	0.412722	-0.384342	33782	26799	30796.5	26955.9	9063.5	13028.2	6983.01	1.26057	0.100567
sp|Q93092|TALDO_MOUSE			Transaldolase OS=Mus musculus OX=10090 GN=Taldo1 PE=1 SV=2	TRUE	-0.872209	0.416627	-0.380252	51022.8	60471	51835.2	61198.4	8664.63	19856.8	-9448.16	0.843757	-0.0737825
sp|P97450|ATP5J_MOUSE			ATP synthase-coupling factor 6, mitochondrial OS=Mus musculus OX=10090 GN=Atp5pf PE=1 SV=1	TRUE	0.871348	0.417062	-0.3798	4119.65	2849.21	4490.07	2441.78	2165.6	1952.8	1270.44	1.44589	0.160136
sp|Q62189|SNRPA_MOUSE			U1 small nuclear ribonucleoprotein A OS=Mus musculus OX=10090 GN=Snrpa PE=1 SV=3	TRUE	0.869951	0.417767	-0.379066	25105.6	13848.6	13379.2	11085	24969.6	6802.55	11257	1.81286	0.258365
sp|P47791-2|GSHR_MOUSE			Isoform Cytoplasmic of Glutathione reductase, mitochondrial OS=Mus musculus OX=10090 GN=Gsr	TRUE	0.86711	0.419203	-0.377575	48512.8	38662.9	45836.8	37251.5	6638.6	21727.4	9849.9	1.25476	0.0985619
sp|Q62425|NDUA4_MOUSE			Cytochrome c oxidase subunit NDUFA4 OS=Mus musculus OX=10090 GN=Ndufa4 PE=1 SV=2	TRUE	0.860191	0.422718	-0.373949	33576.3	21229.7	34201.2	10372.6	14070.7	25021.6	12346.6	1.58157	0.199088
sp|O08709|PRDX6_MOUSE			Peroxiredoxin-6 OS=Mus musculus OX=10090 GN=Prdx6 PE=1 SV=3	TRUE	0.851699	0.427061	-0.36951	42837.1	35938.3	42993.6	33614.2	14618.5	6981.57	6898.81	1.19196	0.0762627
sp|P70677|CASP3_MOUSE			Caspase-3 OS=Mus musculus OX=10090 GN=Casp3 PE=1 SV=1	TRUE	-0.848496	0.428708	-0.367838	4073.39	5274.4	4634.77	4918.39	2524.01	1281.98	-1201.01	0.772294	-0.112217
sp|O70400|PDLI1_MOUSE			PDZ and LIM domain protein 1 OS=Mus musculus OX=10090 GN=Pdlim1 PE=1 SV=4	TRUE	0.844582	0.430727	-0.365798	2109.45	1428.49	2527.07	1491.71	1281.33	978.985	680.952	1.47669	0.16929
sp|Q8CAQ8|MIC60_MOUSE			MICOS complex subunit Mic60 OS=Mus musculus OX=10090 GN=Immt PE=1 SV=1	TRUE	0.839174	0.433527	-0.362984	2840.16	2197.75	2586.85	2138.97	1499.67	308.42	642.41	1.2923	0.111364
sp|P17918|PCNA_MOUSE			Proliferating cell nuclear antigen OS=Mus musculus OX=10090 GN=Pcna PE=1 SV=2	TRUE	0.832793	0.436848	-0.359669	1291.07	967.947	1351.76	949.064	764.993	130.228	323.123	1.33382	0.125098
sp|Q8BY89|CTL2_MOUSE			Choline transporter-like protein 2 OS=Mus musculus OX=10090 GN=Slc44a2 PE=1 SV=2	TRUE	-0.824495	0.441196	-0.355369	6976.86	22455.1	6775.55	3918.27	4131.14	37318	-15478.2	0.310703	-0.507655
sp|P97425|ECP2_MOUSE			Eosinophil cationic protein 2 OS=Mus musculus OX=10090 GN=Ear2 PE=2 SV=1	TRUE	0.823687	0.441621	-0.35495	41036.6	14924.5	17153.9	0	55937	29849.1	26112	2.7496	0.43927
sp|P84099|RL19_MOUSE			60S ribosomal protein L19 OS=Mus musculus OX=10090 GN=Rpl19 PE=1 SV=1	TRUE	-0.823144	0.441907	-0.354669	4684.37	9895.83	4270.87	5104.79	2756.73	12358.6	-5211.46	0.473369	-0.324801
sp|P62962|PROF1_MOUSE			Profilin-1 OS=Mus musculus OX=10090 GN=Pfn1 PE=1 SV=2	TRUE	-0.817634	0.444814	-0.351822	7324.34	15013.8	2306.05	12241.1	11019.5	15243.1	-7689.48	0.48784	-0.311723
sp|P08071|TRFL_MOUSE			Lactotransferrin OS=Mus musculus OX=10090 GN=Ltf PE=1 SV=4	TRUE	0.811933	0.447836	-0.348881	175373	123425	145540	124329	108192	68329.2	51948.6	1.42089	0.152561
sp|O08539-2|BIN1_MOUSE			Isoform 2 of Myc box-dependent-interacting protein 1 OS=Mus musculus OX=10090 GN=Bin1	TRUE	-0.810145	0.448787	-0.34796	5452.35	7045.25	5472.32	7711.48	2851.28	2708.12	-1592.9	0.773904	-0.111313
sp|O70138|MMP8_MOUSE			Neutrophil collagenase OS=Mus musculus OX=10090 GN=Mmp8 PE=2 SV=2	TRUE	0.800336	0.45403	-0.342915	19167.2	13780.4	18270	9774.53	10489.8	8436.32	5386.78	1.3909	0.143296
sp|P10404|ENV1_MOUSE			MLV-related proviral Env polyprotein OS=Mus musculus OX=10090 PE=1 SV=3	TRUE	-0.795923	0.456403	-0.340652	10595.8	20920.6	5399.72	11000.7	10835.7	23573	-10324.8	0.506478	-0.295439
sp|Q9ESB3|HRG_MOUSE			Histidine-rich glycoprotein OS=Mus musculus OX=10090 GN=Hrg PE=1 SV=2	TRUE	0.790727	0.459208	-0.33799	48191.9	17153.4	16943.7	0	70613.7	34306.7	31038.5	2.80947	0.448625
sp|O35114|SCRB2_MOUSE			Lysosome membrane protein 2 OS=Mus musculus OX=10090 GN=Scarb2 PE=1 SV=3	TRUE	-0.789921	0.459645	-0.337578	2413.8	4600.35	2181.88	2624.46	1380.26	5361.32	-2186.56	0.524698	-0.28009
sp|Q9JK48|SHLB1_MOUSE			Endophilin-B1 OS=Mus musculus OX=10090 GN=Sh3glb1 PE=1 SV=1	TRUE	-0.787614	0.460895	-0.336398	2471.92	3701.7	2170.2	3570.32	809.496	3016.06	-1229.78	0.66778	-0.175367
sp|P46412|GPX3_MOUSE			Glutathione peroxidase 3 OS=Mus musculus OX=10090 GN=Gpx3 PE=1 SV=2	TRUE	0.786712	0.461384	-0.335938	102804	45686.7	40682.6	49889.4	143571	21717.7	57117	2.25019	0.352219
sp|P38647|GRP75_MOUSE			Stress-70 protein, mitochondrial OS=Mus musculus OX=10090 GN=Hspa9 PE=1 SV=3	TRUE	-0.783201	0.463293	-0.334144	86184.5	103836	73680.8	107393	31794.4	31950.1	-17651.1	0.830009	-0.0809172
sp|Q07797|LG3BP_MOUSE			Galectin-3-binding protein OS=Mus musculus OX=10090 GN=Lgals3bp PE=1 SV=1	TRUE	-0.777409	0.466454	-0.331191	7231.76	11902.2	8354.04	10583.9	3671.16	11440.7	-4670.4	0.607601	-0.216382
sp|Q9D6J6|NDUV2_MOUSE			NADH dehydrogenase [ubiquinone] flavoprotein 2, mitochondrial OS=Mus musculus OX=10090 GN=Ndufv2 PE=1 SV=2	TRUE	0.771182	0.469869	-0.328023	56943	41280.6	48284.4	34838.6	29094.8	28344.4	15662.4	1.37941	0.139694
sp|P62627|DLRB1_MOUSE			Dynein light chain roadblock-type 1 OS=Mus musculus OX=10090 GN=Dynlrb1 PE=1 SV=3	TRUE	-0.768926	0.471111	-0.326876	15552.1	38373.8	6889.37	13255.8	20092.5	55855.9	-22821.6	0.405281	-0.392244
sp|Q00898|A1AT5_MOUSE			Alpha-1-antitrypsin 1-5 OS=Mus musculus OX=10090 GN=Serpina1e PE=1 SV=1	TRUE	0.764676	0.473457	-0.32472	64708.3	42186.9	76213	37927.4	46708.2	35889.8	22521.4	1.53385	0.185782
sp|Q9ERZ0|HEMGN_MOUSE			Hemogen OS=Mus musculus OX=10090 GN=Hemgn PE=1 SV=1	TRUE	-0.764122	0.473763	-0.324439	1604.69	2090.14	1464.7	2019.6	979.6	809.249	-485.458	0.76774	-0.114786
sp|Q60930|VDAC2_MOUSE			Voltage-dependent anion-selective channel protein 2 OS=Mus musculus OX=10090 GN=Vdac2 PE=1 SV=2	TRUE	-0.763247	0.474247	-0.323996	54437.6	87733.6	50324.3	59596.7	37793.6	78637.8	-33296	0.620488	-0.207267
sp|Q9CR57|RL14_MOUSE			60S ribosomal protein L14 OS=Mus musculus OX=10090 GN=Rpl14 PE=1 SV=3	TRUE	0.747737	0.482885	-0.316156	4319.68	3326.11	3785.63	3052.11	2349.53	1241.91	993.577	1.29872	0.113516
sp|P16858|G3P_MOUSE			Glyceraldehyde-3-phosphate dehydrogenase OS=Mus musculus OX=10090 GN=Gapdh PE=1 SV=2	TRUE	0.743367	0.485338	-0.313956	382992	308265	375046	368800	144168	140128	74726.2	1.24241	0.0942645
sp|Q61335|BAP31_MOUSE			B-cell receptor-associated protein 31 OS=Mus musculus OX=10090 GN=Bcap31 PE=1 SV=4	TRUE	-0.741182	0.486568	-0.312856	2156.6	2683.36	1910.77	2511.31	1093.35	908.285	-526.759	0.803694	-0.0949092
sp|P58774|TPM2_MOUSE			Tropomyosin beta chain OS=Mus musculus OX=10090 GN=Tpm2 PE=1 SV=1	TRUE	-0.723898	0.496371	-0.304193	68983.6	117191	16902.3	104918	108611	77089.8	-48207.4	0.588643	-0.230148
sp|Q9JKF1|IQGA1_MOUSE			Ras GTPase-activating-like protein IQGAP1 OS=Mus musculus OX=10090 GN=Iqgap1 PE=1 SV=2	TRUE	-0.721042	0.498004	-0.302767	49854.1	108405	27726.4	39151.7	50967.9	154201	-58550.6	0.459889	-0.337347
sp|Q9QZI9|SERC3_MOUSE			Serine incorporator 3 OS=Mus musculus OX=10090 GN=Serinc3 PE=1 SV=2	TRUE	0.690251	0.515834	-0.28749	4014.41	2635.32	3508.9	1872.36	2706.96	2939.31	1379.08	1.52331	0.182788
sp|Q9CQB5|CISD2_MOUSE			CDGSH iron-sulfur domain-containing protein 2 OS=Mus musculus OX=10090 GN=Cisd2 PE=1 SV=1	TRUE	-0.689851	0.516068	-0.287293	70238.7	109704	26235.2	99250.7	88582.9	72416.4	-39465.1	0.640258	-0.193645
sp|O70250|PGAM2_MOUSE			Phosphoglycerate mutase 2 OS=Mus musculus OX=10090 GN=Pgam2 PE=1 SV=3	TRUE	-0.681313	0.521087	-0.28309	200014	273727	183311	301298	109955	186364	-73712.3	0.730708	-0.136256
sp|Q8R317|UBQL1_MOUSE			Ubiquilin-1 OS=Mus musculus OX=10090 GN=Ubqln1 PE=1 SV=1	TRUE	-0.678236	0.522904	-0.281578	22775.4	37014.4	19526.4	32082.1	21641.3	35981.6	-14239	0.615312	-0.210905
sp|P16015|CAH3_MOUSE			Carbonic anhydrase 3 OS=Mus musculus OX=10090 GN=Ca3 PE=1 SV=3	TRUE	0.673874	0.525487	-0.279438	90166.3	63644.2	97643.1	37154.6	47048.5	63107.4	26522.1	1.41672	0.151285
sp|Q02819|NUCB1_MOUSE			Nucleobindin-1 OS=Mus musculus OX=10090 GN=Nucb1 PE=1 SV=2	TRUE	0.661259	0.533001	-0.273272	3171.67	2585.23	3208.07	2584.9	1366.78	1130.45	586.437	1.22684	0.0887883
sp|Q9QXS1|PLEC_MOUSE			Plectin OS=Mus musculus OX=10090 GN=Plec PE=1 SV=3	TRUE	0.656288	0.535982	-0.27085	19934.5	17777.5	19452.2	18216.5	5386.82	3767.06	2156.99	1.12133	0.0497346
sp|Q3TCN2|PLBL2_MOUSE			Putative phospholipase B-like 2 OS=Mus musculus OX=10090 GN=Plbd2 PE=1 SV=2	TRUE	0.655271	0.536592	-0.270355	5048.93	4327.81	5688.52	4032.17	1772.47	1304.86	721.119	1.16662	0.0669311
sp|P99026|PSB4_MOUSE			Proteasome subunit beta type-4 OS=Mus musculus OX=10090 GN=Psmb4 PE=1 SV=1	TRUE	0.648746	0.540523	-0.267186	4324	3208.38	3766.15	3033.92	2835.33	1946.7	1115.62	1.34772	0.129599
sp|P97351|RS3A_MOUSE			40S ribosomal protein S3a OS=Mus musculus OX=10090 GN=Rps3a PE=1 SV=3	TRUE	-0.646737	0.541737	-0.266212	1713.29	2589.94	597.049	2673.79	2449.06	1162.55	-876.647	0.661518	-0.179458
sp|Q9DCS9|NDUBA_MOUSE			NADH dehydrogenase [ubiquinone] 1 beta subcomplex subunit 10 OS=Mus musculus OX=10090 GN=Ndufb10 PE=1 SV=3	TRUE	0.646065	0.542143	-0.265886	32327.5	25621.4	33805	27655.3	16472.2	12634.9	6706.12	1.26174	0.10097
sp|Q8C0M9|ASGL1_MOUSE			Isoaspartyl peptidase/L-asparaginase OS=Mus musculus OX=10090 GN=Asrgl1 PE=1 SV=1	TRUE	0.64556	0.542449	-0.265641	4896.67	3834.99	3724.28	4142.36	2882.7	1583.88	1061.68	1.27684	0.106137
sp|P99024|TBB5_MOUSE			Tubulin beta-5 chain OS=Mus musculus OX=10090 GN=Tubb5 PE=1 SV=1	TRUE	0.641844	0.5447	-0.263843	23182.9	9791.03	3286.45	9191.35	41373.5	5436.94	13391.8	2.36777	0.374339
sp|Q9WV92|E41L3_MOUSE			Band 4.1-like protein 3 OS=Mus musculus OX=10090 GN=Epb41l3 PE=1 SV=1	TRUE	0.639657	0.546028	-0.262785	779.537	650.796	680.425	710.184	351.292	196.535	128.741	1.19782	0.078392
sp|Q8BH59|CMC1_MOUSE			Calcium-binding mitochondrial carrier protein Aralar1 OS=Mus musculus OX=10090 GN=Slc25a12 PE=1 SV=1	TRUE	-0.637482	0.547351	-0.261734	5241.35	6233.09	5137	7209.85	1159.03	2887.49	-991.738	0.840891	-0.0752601
sp|P19324|SERPH_MOUSE			Serpin H1 OS=Mus musculus OX=10090 GN=Serpinh1 PE=1 SV=3	TRUE	-0.62797	0.553158	-0.25715	6967.99	10474.1	5438.18	5684.42	3255.13	10681.4	-3506.08	0.665261	-0.177008
sp|Q9Z239|PLM_MOUSE			Phospholemman OS=Mus musculus OX=10090 GN=Fxyd1 PE=1 SV=1	TRUE	-0.624045	0.555566	-0.255264	19696.2	30567.7	3570.23	34347.3	33101.3	10874.6	-10871.4	0.644349	-0.190879
sp|Q9Z2I9|SUCB1_MOUSE			Succinate--CoA ligase [ADP-forming] subunit beta, mitochondrial OS=Mus musculus OX=10090 GN=Sucla2 PE=1 SV=2	TRUE	0.615842	0.560619	-0.251332	5907.24	4492.86	4073.94	4724.26	4360.34	1444.25	1414.37	1.3148	0.118861
sp|Q9CRB9|MIC19_MOUSE			MICOS complex subunit Mic19 OS=Mus musculus OX=10090 GN=Chchd3 PE=1 SV=1	TRUE	-0.610829	0.56372	-0.248936	3409.18	4271.78	3257.03	4868.57	1213.24	2550.48	-862.595	0.798071	-0.0979583
sp|P70372|ELAV1_MOUSE			ELAV-like protein 1 OS=Mus musculus OX=10090 GN=Elavl1 PE=1 SV=2	TRUE	-0.606157	0.56662	-0.246708	11479.5	15601.5	10736.5	11605.1	4080.68	12974	-4122.05	0.735792	-0.133245
sp|P56528|CD38_MOUSE			ADP-ribosyl cyclase/cyclic ADP-ribose hydrolase 1 OS=Mus musculus OX=10090 GN=Cd38 PE=1 SV=2	TRUE	-0.602843	0.568683	-0.24513	7346.06	10161.6	4510.89	10318.2	8126.97	4605.04	-2815.57	0.722921	-0.140909
sp|Q9CQ75|NDUA2_MOUSE			NADH dehydrogenase [ubiquinone] 1 alpha subcomplex subunit 2 OS=Mus musculus OX=10090 GN=Ndufa2 PE=1 SV=3	TRUE	-0.598165	0.571602	-0.242906	21380.2	27572.8	15603.1	29494.3	19632.7	6577.59	-6192.59	0.77541	-0.110469
sp|Q9CQI7|RU2B_MOUSE			U2 small nuclear ribonucleoprotein B'' OS=Mus musculus OX=10090 GN=Snrpb2 PE=1 SV=1	TRUE	-0.594669	0.57379	-0.241247	3368.09	4435.06	3886.54	3001.94	1640.77	3191.38	-1066.97	0.759423	-0.119516
sp|P08226|APOE_MOUSE			Apolipoprotein E OS=Mus musculus OX=10090 GN=Apoe PE=1 SV=2	TRUE	-0.591666	0.575673	-0.239824	31190.6	39403.8	18488.2	38714.4	27074	6146.77	-8213.21	0.791563	-0.101514
sp|P63038|CH60_MOUSE			60 kDa heat shock protein, mitochondrial OS=Mus musculus OX=10090 GN=Hspd1 PE=1 SV=1	TRUE	-0.580217	0.582886	-0.234416	120600	165353	116492	105239	30685	151177	-44752.2	0.729353	-0.137062
sp|Q99LX0|PARK7_MOUSE			Parkinson disease protein 7 homolog OS=Mus musculus OX=10090 GN=Park7 PE=1 SV=1	TRUE	0.579369	0.583422	-0.234017	4155.68	3341.01	4572.54	3301.54	2203.33	1747.57	814.663	1.24384	0.0947635
sp|Q9CQX8|RT36_MOUSE			28S ribosomal protein S36, mitochondrial OS=Mus musculus OX=10090 GN=Mrps36 PE=1 SV=1	TRUE	0.579192	0.583535	-0.233933	2603.81	2038.83	2367.68	2036.47	1832.72	668.81	564.984	1.27711	0.106229
sp|P10649|GSTM1_MOUSE			Glutathione S-transferase Mu 1 OS=Mus musculus OX=10090 GN=Gstm1 PE=1 SV=2	TRUE	-0.577502	0.584604	-0.233138	4527.94	7475.58	1863.83	6242.42	5833	8377.61	-2947.64	0.605697	-0.217744
sp|P10518|HEM2_MOUSE			Delta-aminolevulinic acid dehydratase OS=Mus musculus OX=10090 GN=Alad PE=1 SV=1	TRUE	-0.570458	0.589076	-0.229828	24587.4	31639.7	25232.1	19980.9	3000.76	24542.2	-7052.29	0.777106	-0.10952
sp|Q5SX39|MYH4_MOUSE			Myosin-4 OS=Mus musculus OX=10090 GN=Myh4 PE=2 SV=1	TRUE	0.566079	0.591866	-0.227776	94482.7	64264.2	59576.2	53134.5	97733	42975	30218.5	1.47022	0.167383
sp|P14206|RSSA_MOUSE			40S ribosomal protein SA OS=Mus musculus OX=10090 GN=Rpsa PE=1 SV=4	TRUE	0.563933	0.593236	-0.226772	46429.1	38149.3	56482.1	39411.1	23999.3	16920.3	8279.76	1.21704	0.0853033
sp|A2ASS6|TITIN_MOUSE			Titin OS=Mus musculus OX=10090 GN=Ttn PE=1 SV=1	TRUE	0.561551	0.594759	-0.225659	31023.1	28423.1	29270.1	27970.1	8462.54	3759.1	2599.95	1.09147	0.038013
sp|P11688|ITA5_MOUSE			Integrin alpha-5 OS=Mus musculus OX=10090 GN=Itga5 PE=1 SV=3	TRUE	0.532558	0.613476	-0.212202	2312.24	1847.9	1841.85	1608.15	1547.99	802.826	464.334	1.25128	0.097353
sp|Q8BGH2|SAM50_MOUSE			Sorting and assembly machinery component 50 homolog OS=Mus musculus OX=10090 GN=Samm50 PE=1 SV=1	TRUE	0.528846	0.615895	-0.210493	22858.1	16721	14184.8	10869	19236.3	12986.5	6137.15	1.36703	0.135779
sp|Q922B2|SYDC_MOUSE			Aspartate--tRNA ligase, cytoplasmic OS=Mus musculus OX=10090 GN=Dars1 PE=1 SV=2	TRUE	-0.524135	0.618975	-0.208327	215.178	303.474	174.591	355.779	257.155	217.682	-88.2953	0.709051	-0.149322
sp|Q07076|ANXA7_MOUSE			Annexin A7 OS=Mus musculus OX=10090 GN=Anxa7 PE=1 SV=2	TRUE	0.519294	0.622147	-0.206107	2089.18	1739.32	2034.89	1790.02	1210.38	592.113	349.861	1.20115	0.0795966
sp|P54071|IDHP_MOUSE			Isocitrate dehydrogenase [NADP], mitochondrial OS=Mus musculus OX=10090 GN=Idh2 PE=1 SV=3	TRUE	-0.515977	0.624326	-0.204588	16073.4	20145.4	14523.8	14285.5	7977.07	13619.3	-4071.95	0.797872	-0.098067
sp|P63323|RS12_MOUSE			40S ribosomal protein S12 OS=Mus musculus OX=10090 GN=Rps12 PE=1 SV=2	TRUE	-0.514122	0.625547	-0.20374	3198.81	4274.9	3207.37	4079.47	351.144	4171.37	-1076.09	0.748277	-0.125938
sp|Q02013|AQP1_MOUSE			Aquaporin-1 OS=Mus musculus OX=10090 GN=Aqp1 PE=1 SV=3	TRUE	-0.511357	0.627368	-0.202478	70603.3	95726.1	27598.7	84080.5	90807.1	37536	-25122.8	0.737555	-0.132205
sp|P03958|ADA_MOUSE			Adenosine deaminase OS=Mus musculus OX=10090 GN=Ada PE=1 SV=3	TRUE	0.511302	0.627404	-0.202452	8832.49	6604.72	5911.29	6677.69	8508.52	1881.7	2227.77	1.3373	0.126229
sp|Q99KB8|GLO2_MOUSE			Hydroxyacylglutathione hydrolase, mitochondrial OS=Mus musculus OX=10090 GN=Hagh PE=1 SV=2	TRUE	0.504889	0.631641	-0.19953	15653.2	14099.1	15434.2	13818	5748.6	2202.37	1554.06	1.11022	0.0454105
sp|Q8VCI0|PLBL1_MOUSE			Phospholipase B-like 1 OS=Mus musculus OX=10090 GN=Plbd1 PE=1 SV=1	TRUE	-0.503175	0.632775	-0.198751	12167.5	13165.5	10581	13020.7	3442.44	1971.36	-998.035	0.924193	-0.0342373
sp|Q80Z71|TENN_MOUSE			Tenascin-N OS=Mus musculus OX=10090 GN=Tnn PE=1 SV=2	TRUE	0.502195	0.633425	-0.198305	104415	81046.9	73255.8	77084.8	86029.6	35491.9	23367.9	1.28833	0.110026
sp|Q9DB15|RM12_MOUSE			39S ribosomal protein L12, mitochondrial OS=Mus musculus OX=10090 GN=Mrpl12 PE=1 SV=2	TRUE	0.499477	0.635227	-0.197071	5704.9	4217.98	4821.58	4720.88	5000	3232.5	1486.92	1.35252	0.131144
sp|P19783|COX41_MOUSE			Cytochrome c oxidase subunit 4 isoform 1, mitochondrial OS=Mus musculus OX=10090 GN=Cox4i1 PE=1 SV=2	TRUE	0.498057	0.63617	-0.196427	42568.1	33038.1	36737.4	26457.2	24176.1	29665.3	9530.05	1.28846	0.11007
sp|P70670|NACAM_MOUSE			Nascent polypeptide-associated complex subunit alpha, muscle-specific form OS=Mus musculus OX=10090 GN=Naca PE=1 SV=2	TRUE	0.49687	0.636959	-0.195889	98477.2	62635.7	36720.9	34427.3	129704	63170.8	35841.5	1.57222	0.196514
sp|Q9CRB6|TPPP3_MOUSE			Tubulin polymerization-promoting protein family member 3 OS=Mus musculus OX=10090 GN=Tppp3 PE=1 SV=1	TRUE	0.495636	0.637779	-0.19533	17593.3	14503.5	16238.4	10206.5	6759.62	10476.4	3089.76	1.21304	0.0838735
sp|P97290|IC1_MOUSE			Plasma protease C1 inhibitor OS=Mus musculus OX=10090 GN=Serping1 PE=1 SV=3	TRUE	0.490074	0.641484	-0.192814	17053.7	10903.9	6785.35	7955.31	23108.9	9790.33	6149.76	1.564	0.194236
sp|O88990|ACTN3_MOUSE			Alpha-actinin-3 OS=Mus musculus OX=10090 GN=Actn3 PE=2 SV=1	TRUE	0.489986	0.641544	-0.192774	145004	118143	118992	111257	103072	37374.1	26860.8	1.22736	0.0889716
sp|Q9CQ92|FIS1_MOUSE			Mitochondrial fission 1 protein OS=Mus musculus OX=10090 GN=Fis1 PE=1 SV=1	TRUE	0.487859	0.642964	-0.191814	15999.2	12398.6	19749	14767.5	11515.5	9234.32	3600.58	1.2904	0.110725
sp|P31996|CD68_MOUSE			Macrosialin OS=Mus musculus OX=10090 GN=Cd68 PE=1 SV=1	TRUE	0.482916	0.64627	-0.189586	9992.45	8085.37	9905.96	7617.6	3990.21	6816.12	1907.08	1.23587	0.0919721
sp|P23780|BGAL_MOUSE			Beta-galactosidase OS=Mus musculus OX=10090 GN=Glb1 PE=1 SV=1	TRUE	0.478342	0.649337	-0.18753	25295	19372.9	27639.6	11915.5	17610	17406.9	5922.14	1.30569	0.115841
sp|P58252|EF2_MOUSE			Elongation factor 2 OS=Mus musculus OX=10090 GN=Eef2 PE=1 SV=2	TRUE	-0.477398	0.649971	-0.187106	85225.7	121040	26270.2	122221	124555	83650.1	-35813.9	0.704114	-0.152357
sp|P14824|ANXA6_MOUSE			Annexin A6 OS=Mus musculus OX=10090 GN=Anxa6 PE=1 SV=3	TRUE	0.472432	0.653312	-0.184879	1274.5	1069.69	1203.31	1216.22	602.565	623.469	204.814	1.19147	0.0760834
sp|P45376|ALDR_MOUSE			Aldo-keto reductase family 1 member B1 OS=Mus musculus OX=10090 GN=Akr1b1 PE=1 SV=3	TRUE	-0.472105	0.653533	-0.184733	2565.58	2921.19	2545.96	2744.38	777.859	1290.14	-355.612	0.878265	-0.0563746
sp|P82198|BGH3_MOUSE			Transforming growth factor-beta-induced protein ig-h3 OS=Mus musculus OX=10090 GN=Tgfbi PE=1 SV=1	TRUE	0.470314	0.65474	-0.183931	67200.5	40285.9	11479.1	41451.3	112921	18667.7	26914.7	1.66809	0.22222
sp|P22599|A1AT2_MOUSE			Alpha-1-antitrypsin 1-2 OS=Mus musculus OX=10090 GN=Serpina1b PE=1 SV=2	TRUE	0.469415	0.655346	-0.183529	2440.85	1912.49	1568.58	1953.69	2137.42	706.418	528.358	1.27627	0.105942
sp|Q9Z2X1|HNRPF_MOUSE			Heterogeneous nuclear ribonucleoprotein F OS=Mus musculus OX=10090 GN=Hnrnpf PE=1 SV=3	TRUE	-0.46681	0.657105	-0.182365	3606.24	4306.53	3404.76	4300.16	2876.5	853.042	-700.29	0.837389	-0.0770728
sp|O70370|CATS_MOUSE			Cathepsin S OS=Mus musculus OX=10090 GN=Ctss PE=1 SV=2	TRUE	0.46466	0.658558	-0.181406	20238.9	12578.7	9755.87	776.53	22619.4	23988.8	7660.2	1.60898	0.206551
sp|P29788|VTNC_MOUSE			Vitronectin OS=Mus musculus OX=10090 GN=Vtn PE=1 SV=2	TRUE	0.463212	0.659538	-0.18076	11924	9484.78	13023.7	8544.67	6008.35	8649.57	2439.19	1.25717	0.0993936
sp|Q01279|EGFR_MOUSE			Epidermal growth factor receptor OS=Mus musculus OX=10090 GN=Egfr PE=1 SV=1	TRUE	-0.457754	0.663238	-0.178331	1831.02	2523.77	1826.19	2021.05	1267.84	2748.39	-692.749	0.72551	-0.139357
sp|P63276|RS17_MOUSE			40S ribosomal protein S17 OS=Mus musculus OX=10090 GN=Rps17 PE=1 SV=2	TRUE	-0.457224	0.663598	-0.178095	9368.24	10478.1	8868.65	9853.04	1306.65	4675.65	-1109.86	0.894078	-0.0486247
sp|P02468|LAMC1_MOUSE			Laminin subunit gamma-1 OS=Mus musculus OX=10090 GN=Lamc1 PE=1 SV=2	TRUE	0.455011	0.665101	-0.177112	76743.6	51903.7	25925.4	36887.5	103088	35972.1	24839.9	1.47858	0.169844
sp|P01872|IGHM_MOUSE			Immunoglobulin heavy constant mu OS=Mus musculus OX=10090 GN=Ighm PE=1 SV=2	TRUE	0.440183	0.675219	-0.170555	11779	7580.55	2679.76	7904.72	19000.5	1697.65	4198.5	1.55385	0.19141
sp|P26645|MARCS_MOUSE			Myristoylated alanine-rich C-kinase substrate OS=Mus musculus OX=10090 GN=Marcks PE=1 SV=2	TRUE	0.434045	0.679429	-0.167856	37217.9	27624.3	18704.6	28779.6	40380.3	17987.4	9593.56	1.34729	0.12946
sp|Q99LC5|ETFA_MOUSE			Electron transfer flavoprotein subunit alpha, mitochondrial OS=Mus musculus OX=10090 GN=Etfa PE=1 SV=2	TRUE	-0.432239	0.68067	-0.167063	923809	1.3104e+06	89643.2	1.30507e+06	1.66939e+06	642557	-386591	0.704982	-0.151822
sp|Q03265|ATPA_MOUSE			ATP synthase subunit alpha, mitochondrial OS=Mus musculus OX=10090 GN=Atp5f1a PE=1 SV=1	TRUE	0.431999	0.680835	-0.166958	176894	143107	136265	100594	99977.1	120298	33786.6	1.23609	0.0920512
sp|Q9JKB3|YBOX3_MOUSE			Y-box-binding protein 3 OS=Mus musculus OX=10090 GN=Ybx3 PE=1 SV=2	TRUE	-0.420148	0.689008	-0.161776	91358.7	124378	26804.4	115287	145063	60511.9	-33019.1	0.734526	-0.133993
sp|O09159|MA2B1_MOUSE			Lysosomal alpha-mannosidase OS=Mus musculus OX=10090 GN=Man2b1 PE=1 SV=4	TRUE	-0.419501	0.689456	-0.161494	7161.46	8693.37	5276.87	8342.66	5102.94	5225.02	-1531.91	0.823784	-0.0841865
sp|P28650|PURA1_MOUSE			Adenylosuccinate synthetase isozyme 1 OS=Mus musculus OX=10090 GN=Adss1 PE=1 SV=2	TRUE	0.417344	0.690948	-0.160554	3237.77	2726.34	2170.8	2817.69	2354.9	679.177	511.432	1.18759	0.0746663
sp|Q7TPR4|ACTN1_MOUSE			Alpha-actinin-1 OS=Mus musculus OX=10090 GN=Actn1 PE=1 SV=1	TRUE	0.404945	0.69956	-0.155175	21162.3	15242.8	11702.7	8100.66	23735.5	17069.9	5919.53	1.38835	0.142499
sp|O89104|SYPL2_MOUSE			Synaptophysin-like protein 2 OS=Mus musculus OX=10090 GN=Sypl2 PE=1 SV=1	TRUE	-0.4047	0.699731	-0.155069	116220	152781	53745.8	173140	136224	118698	-36561.2	0.760696	-0.118789
sp|Q9CZ13|QCR1_MOUSE			Cytochrome b-c1 complex subunit 1, mitochondrial OS=Mus musculus OX=10090 GN=Uqcrc1 PE=1 SV=2	TRUE	0.393198	0.707764	-0.150111	20381.3	18466.9	20351.8	17860	8174.97	5290.49	1914.39	1.10367	0.0428377
sp|Q9QYG0-2|NDRG2_MOUSE			Isoform 2 of Protein NDRG2 OS=Mus musculus OX=10090 GN=Ndrg2	TRUE	0.392623	0.708166	-0.149865	22053.3	18857.5	22828	20215.4	10069.5	12791.1	3195.77	1.16947	0.0679888
sp|Q62230|SN_MOUSE			Sialoadhesin OS=Mus musculus OX=10090 GN=Siglec1 PE=1 SV=2	TRUE	-0.39031	0.709788	-0.148872	6462.97	7771.21	5518.1	7063.58	3576.68	5669.71	-1308.24	0.831655	-0.0800566
sp|P97449|AMPN_MOUSE			Aminopeptidase N OS=Mus musculus OX=10090 GN=Anpep PE=1 SV=4	TRUE	-0.389313	0.710487	-0.148444	184598	249441	29303.2	240989	321142	88497.8	-64842.6	0.740048	-0.13074
sp|P13542|MYH8_MOUSE			Myosin-8 OS=Mus musculus OX=10090 GN=Myh8 PE=2 SV=2	TRUE	-0.375666	0.720089	-0.142614	6561	7413	6412.57	7292.22	2635.02	3692.09	-852.001	0.885067	-0.053024
sp|P47738|ALDH2_MOUSE			Aldehyde dehydrogenase, mitochondrial OS=Mus musculus OX=10090 GN=Aldh2 PE=1 SV=1	TRUE	0.375105	0.720485	-0.142375	75885	68118.7	85557.7	70195.1	38691.4	14753.2	7766.29	1.11401	0.0468895
sp|Q8BMK4|CKAP4_MOUSE			Cytoskeleton-associated protein 4 OS=Mus musculus OX=10090 GN=Ckap4 PE=1 SV=2	TRUE	0.370555	0.723699	-0.140442	66190.2	58538.7	54148.4	63333.8	37032.3	18278.3	7651.52	1.13071	0.0533507
sp|P27773|PDIA3_MOUSE			Protein disulfide-isomerase A3 OS=Mus musculus OX=10090 GN=Pdia3 PE=1 SV=2	TRUE	-0.369438	0.724489	-0.139968	2688.48	3300.81	1290.23	2864.73	2895.71	1613.51	-612.326	0.814492	-0.0891132
sp|Q60847|COCA1_MOUSE			Collagen alpha-1(XII) chain OS=Mus musculus OX=10090 GN=Col12a1 PE=2 SV=3	TRUE	0.360917	0.730529	-0.136363	84388.7	73475	59061.3	81356.7	57741.9	17983.6	10913.7	1.14854	0.0601447
sp|P01831|THY1_MOUSE			Thy-1 membrane glycoprotein OS=Mus musculus OX=10090 GN=Thy1 PE=1 SV=1	TRUE	-0.353299	0.735946	-0.133154	25298.8	27927.8	21351.7	29725.4	12733.9	7702.93	-2628.97	0.905865	-0.0429364
sp|P03930|ATP8_MOUSE			ATP synthase protein 8 OS=Mus musculus OX=10090 GN=Mtatp8 PE=1 SV=1	TRUE	-0.352167	0.736752	-0.132678	21406.9	22997.3	21742.1	22046.6	6821.3	5920.57	-1590.45	0.930842	-0.031124
sp|Q91YE8|SYNP2_MOUSE			Synaptopodin-2 OS=Mus musculus OX=10090 GN=Synpo2 PE=1 SV=2	TRUE	-0.350695	0.737802	-0.13206	2353.34	2516.34	2470.14	2405.85	492.09	788.672	-163.003	0.935222	-0.0290852
sp|Q61292|LAMB2_MOUSE			Laminin subunit beta-2 OS=Mus musculus OX=10090 GN=Lamb2 PE=1 SV=2	TRUE	-0.346671	0.740673	-0.130374	15039.3	17733.6	13497.6	12864.2	8493.57	13017.7	-2694.25	0.848071	-0.0715677
sp|Q06890|CLUS_MOUSE			Clusterin OS=Mus musculus OX=10090 GN=Clu PE=1 SV=1	TRUE	-0.336806	0.747731	-0.126254	2078.14	2272.14	2472.92	2302.71	1018.92	537.439	-193.995	0.91462	-0.0387593
sp|P43025|TETN_MOUSE			Tetranectin OS=Mus musculus OX=10090 GN=Clec3b PE=1 SV=2	TRUE	-0.330912	0.751962	-0.123804	48963.4	52729.2	39960.1	52488.6	21550.2	7321.27	-3765.77	0.928583	-0.0321793
sp|O70423|AOC3_MOUSE			Membrane primary amine oxidase OS=Mus musculus OX=10090 GN=Aoc3 PE=1 SV=3	TRUE	-0.314784	0.763585	-0.117143	56053.7	65449.4	34402.4	62839.4	50678.7	31549	-9395.75	0.856443	-0.0673017
sp|Q5SX40|MYH1_MOUSE			Myosin-1 OS=Mus musculus OX=10090 GN=Myh1 PE=1 SV=1	TRUE	0.308438	0.768177	-0.114539	60714.2	50785	37474.1	50723.8	63904.7	7835.63	9929.13	1.19551	0.0775543
sp|Q8K558|TRML1_MOUSE			Trem-like transcript 1 protein OS=Mus musculus OX=10090 GN=Treml1 PE=1 SV=2	TRUE	0.307647	0.76875	-0.114215	1454.67	1290.38	1527.28	1352.41	545.973	917.94	164.289	1.12732	0.0520468
sp|Q9QUM0|ITA2B_MOUSE			Integrin alpha-IIb OS=Mus musculus OX=10090 GN=Itga2b PE=1 SV=2	TRUE	-0.299373	0.774755	-0.110836	7842.43	8928.93	8226.87	9146.56	3271.81	6479.27	-1086.5	0.878317	-0.0563487
sp|P11352|GPX1_MOUSE			Glutathione peroxidase 1 OS=Mus musculus OX=10090 GN=Gpx1 PE=1 SV=2	TRUE	-0.295552	0.777533	-0.109281	10803.1	11831.7	10069	12178.8	6847.92	1245.86	-1028.57	0.913066	-0.0394976
sp|P51437|CAMP_MOUSE			Cathelicidin antimicrobial peptide OS=Mus musculus OX=10090 GN=Camp PE=1 SV=2	TRUE	-0.294471	0.77832	-0.108842	167756	196735	88433.9	193992	171047	97373.6	-28979.2	0.8527	-0.0692039
sp|Q9JK37|MYOZ1_MOUSE			Myozenin-1 OS=Mus musculus OX=10090 GN=Myoz1 PE=1 SV=1	TRUE	0.287781	0.783196	-0.106129	21983.3	20614.3	24677.7	19786.3	7139.78	6287.94	1368.96	1.06641	0.0279235
sp|O54824|IL16_MOUSE			Pro-interleukin-16 OS=Mus musculus OX=10090 GN=Il16 PE=1 SV=3	TRUE	-0.286911	0.783831	-0.105778	76304	93814.4	23154.6	96388.6	120143	21554.8	-17510.3	0.813351	-0.0897217
sp|P98086|C1QA_MOUSE			Complement C1q subcomponent subunit A OS=Mus musculus OX=10090 GN=C1qa PE=1 SV=2	TRUE	-0.284054	0.785917	-0.104623	3909.96	4514.74	2090.17	4648.88	4220.55	564.475	-604.771	0.866045	-0.0624595
sp|Q9DC77|SMPX_MOUSE			Small muscular protein OS=Mus musculus OX=10090 GN=Smpx PE=1 SV=2	TRUE	-0.279757	0.789058	-0.102891	1653.92	1752.58	1501.09	1730.74	455.505	538.541	-98.6625	0.943705	-0.025164
sp|Q9DCT2|NDUS3_MOUSE			NADH dehydrogenase [ubiquinone] iron-sulfur protein 3, mitochondrial OS=Mus musculus OX=10090 GN=Ndufs3 PE=1 SV=2	TRUE	-0.279642	0.789143	-0.102845	50844	60023.7	28391.3	66360.6	53119	38584	-9179.69	0.847065	-0.072083
sp|Q8K4Z5|SF3A1_MOUSE			Splicing factor 3A subunit 1 OS=Mus musculus OX=10090 GN=Sf3a1 PE=1 SV=1	TRUE	-0.277128	0.790982	-0.101834	12310.5	15863.9	6007.89	5301.01	13325.3	21910.4	-3553.38	0.776008	-0.110134
sp|Q8VCT4|EST1D_MOUSE			Carboxylesterase 1D OS=Mus musculus OX=10090 GN=Ces1d PE=1 SV=1	TRUE	-0.272017	0.794727	-0.099782	12437.5	14240.3	8773.89	15583.3	12882.7	3122.06	-1802.88	0.873396	-0.0587887
sp|Q04857|CO6A1_MOUSE			Collagen alpha-1(VI) chain OS=Mus musculus OX=10090 GN=Col6a1 PE=1 SV=1	TRUE	-0.270467	0.795864	-0.0991611	376255	459518	128002	513586	541190	293583	-83262.3	0.818805	-0.0868195
sp|P15379|CD44_MOUSE			CD44 antigen OS=Mus musculus OX=10090 GN=Cd44 PE=1 SV=3	TRUE	0.263108	0.801269	-0.0962216	12369.9	10532.5	8675.18	9346.85	11926.6	7268.93	1837.43	1.17445	0.0698359
sp|Q9JIF9|MYOTI_MOUSE			Myotilin OS=Mus musculus OX=10090 GN=Myot PE=1 SV=1	TRUE	0.258803	0.804437	-0.0945079	11043.6	9117.44	5882.6	7144.76	12819	7565.11	1926.12	1.21126	0.0832362
sp|Q61730|IL1AP_MOUSE			Interleukin-1 receptor accessory protein OS=Mus musculus OX=10090 GN=Il1rap PE=1 SV=1	TRUE	-0.253483	0.808357	-0.0923966	1356.36	1410.58	1268.87	1484.74	279.684	323.783	-54.2268	0.961557	-0.0170249
sp|Q91Z83|MYH7_MOUSE			Myosin-7 OS=Mus musculus OX=10090 GN=Myh7 PE=2 SV=1	TRUE	-0.252413	0.809146	-0.0919731	14244.5	16290.8	14635.6	13374.9	9800.05	12917.5	-2046.35	0.874386	-0.0582967
sp|Q9CR61|NDUB7_MOUSE			NADH dehydrogenase [ubiquinone] 1 beta subcomplex subunit 7 OS=Mus musculus OX=10090 GN=Ndufb7 PE=1 SV=3	TRUE	-0.251819	0.809585	-0.0917377	116341	141675	24512.9	154419	191807	60799.2	-25334.5	0.821179	-0.0855623
sp|Q9CQ62|DECR_MOUSE			2,4-dienoyl-CoA reductase [(3E)-enoyl-CoA-producing], mitochondrial OS=Mus musculus OX=10090 GN=Decr1 PE=1 SV=1	TRUE	0.247828	0.812531	-0.09016	145659	119616	53531.9	130363	194385	79910	26042.8	1.21772	0.0855472
sp|P21614|VTDB_MOUSE			Vitamin D-binding protein OS=Mus musculus OX=10090 GN=Gc PE=1 SV=2	TRUE	0.237448	0.820209	-0.0860753	22490.3	21413.3	21467.4	22683.5	6743.47	6067.94	1077.02	1.0503	0.021312
sp|Q9Z1P6|NDUA7_MOUSE			NADH dehydrogenase [ubiquinone] 1 alpha subcomplex subunit 7 OS=Mus musculus OX=10090 GN=Ndufa7 PE=1 SV=3	TRUE	-0.233727	0.822967	-0.0846175	12830.6	14484	10960.3	13449.1	9826.16	10179.1	-1653.39	0.885847	-0.0526413
sp|Q9CQC9|SAR1B_MOUSE			GTP-binding protein SAR1b OS=Mus musculus OX=10090 GN=Sar1b PE=1 SV=1	TRUE	0.226471	0.828354	-0.0817842	47284.8	38813	48016.5	2390.32	15505.8	73190.9	8471.74	1.21827	0.0857437
sp|P51150|RAB7A_MOUSE			Ras-related protein Rab-7a OS=Mus musculus OX=10090 GN=Rab7a PE=1 SV=2	TRUE	-0.217695	0.834882	-0.0783751	14810.7	17539.1	16499.3	6964.86	7743.53	23840.5	-2728.43	0.844438	-0.0734324
sp|P47915|RL29_MOUSE			60S ribosomal protein L29 OS=Mus musculus OX=10090 GN=Rpl29 PE=1 SV=2	TRUE	0.211642	0.839392	-0.0760351	8780.25	7418.07	8756.48	1922.23	5258.02	11749.7	1362.18	1.18363	0.0732161
sp|P24369|PPIB_MOUSE			Peptidyl-prolyl cis-trans isomerase B OS=Mus musculus OX=10090 GN=Ppib PE=1 SV=2	TRUE	0.210125	0.840524	-0.0754499	8719.26	8144.14	8849.74	5994.44	1919.22	5126.59	575.118	1.07062	0.0296343
sp|P09411|PGK1_MOUSE			Phosphoglycerate kinase 1 OS=Mus musculus OX=10090 GN=Pgk1 PE=1 SV=4	TRUE	-0.20543	0.844028	-0.073643	81118.4	86931.6	74794.4	90076.1	17130.8	53939.9	-5813.15	0.93313	-0.030058
sp|P15532|NDKA_MOUSE			Nucleoside diphosphate kinase A OS=Mus musculus OX=10090 GN=Nme1 PE=1 SV=1	TRUE	-0.201382	0.847054	-0.0720891	2196.96	2263.48	2156.88	2232.94	218.075	623.655	-66.5249	0.970609	-0.0129555
sp|O55042|SYUA_MOUSE			Alpha-synuclein OS=Mus musculus OX=10090 GN=Snca PE=1 SV=2	TRUE	0.200607	0.847633	-0.0717921	4598.36	3931.84	2060.1	3498.65	5954.67	2949.29	666.519	1.16952	0.0680071
sp|P19221|THRB_MOUSE			Prothrombin OS=Mus musculus OX=10090 GN=F2 PE=1 SV=1	TRUE	-0.198926	0.84889	-0.0711485	11419.1	13084.3	11476.3	9966.6	8118.19	14642	-1665.21	0.872732	-0.0591189
sp|Q9JI91|ACTN2_MOUSE			Alpha-actinin-2 OS=Mus musculus OX=10090 GN=Actn2 PE=1 SV=2	TRUE	0.198837	0.848957	-0.0711142	65105.8	60981.7	61170.9	50411	30188.4	28450.5	4124.09	1.06763	0.02842
sp|P37804|TAGL_MOUSE			Transgelin OS=Mus musculus OX=10090 GN=Tagln PE=1 SV=3	TRUE	0.198509	0.849202	-0.0709887	5269.22	4800.43	4083.87	4016.39	3212.1	3462.71	468.791	1.09766	0.0404663
sp|Q8BTM8|FLNA_MOUSE			Filamin-A OS=Mus musculus OX=10090 GN=Flna PE=1 SV=5	TRUE	0.195638	0.851351	-0.0698915	62892.5	58994.7	76056.6	58070.2	34398.4	20114.8	3897.89	1.06607	0.0277865
sp|Q05144|RAC2_MOUSE			Ras-related C3 botulinum toxin substrate 2 OS=Mus musculus OX=10090 GN=Rac2 PE=1 SV=1	TRUE	-0.18627	0.858371	-0.0663248	33036.7	36635.6	19991.8	31956.3	35206.5	15928.9	-3598.94	0.901764	-0.0449072
sp|P18572-2|BASI_MOUSE			Isoform 2 of Basigin OS=Mus musculus OX=10090 GN=Bsg	TRUE	-0.179748	0.863267	-0.0638546	44817.6	50875	48466.9	20221	13356.7	66062.5	-6057.43	0.880935	-0.0550561
sp|P24452|CAPG_MOUSE			Macrophage-capping protein OS=Mus musculus OX=10090 GN=Capg PE=1 SV=2	TRUE	0.174538	0.867183	-0.0618891	18714.5	17531.4	16935.7	18590.4	10265.1	8856.23	1183.15	1.06749	0.0283628
sp|Q9D8E6|RL4_MOUSE			60S ribosomal protein L4 OS=Mus musculus OX=10090 GN=Rpl4 PE=1 SV=3	TRUE	-0.171193	0.8697	-0.0606306	3022.36	3226.45	2906.18	3385	2089.98	1147.55	-204.087	0.936745	-0.0283784
sp|P62259|1433E_MOUSE			14-3-3 protein epsilon OS=Mus musculus OX=10090 GN=Ywhae PE=1 SV=1	TRUE	-0.161227	0.877206	-0.0568984	5670.85	5936.9	6577.09	6032.6	3163.23	940.987	-266.044	0.955188	-0.0199111
sp|P67778|PHB_MOUSE			Prohibitin OS=Mus musculus OX=10090 GN=Phb PE=1 SV=1	TRUE	-0.159621	0.878417	-0.0562991	10456.2	10968.7	10763.7	10114.3	4930.93	4113.66	-512.507	0.953276	-0.0207815
sp|Q9D8Y0|EFHD2_MOUSE			EF-hand domain-containing protein D2 OS=Mus musculus OX=10090 GN=Efhd2 PE=1 SV=1	TRUE	0.150552	0.885263	-0.0529276	5272.88	4871.31	4255.04	3574.09	4129.88	3376.68	401.566	1.08243	0.0344018
sp|P31001|DESM_MOUSE			Desmin OS=Mus musculus OX=10090 GN=Des PE=1 SV=3	TRUE	0.148534	0.886788	-0.0521804	165038	149758	72143.7	137684	199652	49699.5	15280.1	1.10203	0.0421941
sp|Q61735|CD47_MOUSE			Leukocyte surface antigen CD47 OS=Mus musculus OX=10090 GN=Cd47 PE=1 SV=2	TRUE	-0.147891	0.887273	-0.0519425	5040.25	5352.33	4883.75	4415.11	3486.67	2377.98	-312.079	0.941693	-0.0260908
sp|Q8K1I7|WIPF1_MOUSE			WAS/WASL-interacting protein family member 1 OS=Mus musculus OX=10090 GN=Wipf1 PE=1 SV=1	TRUE	-0.14358	0.890533	-0.05035	52865.4	59159.4	10484	57807.3	87180.6	9281.4	-6294.07	0.893608	-0.0488528
sp|P61982|1433G_MOUSE			14-3-3 protein gamma OS=Mus musculus OX=10090 GN=Ywhag PE=1 SV=2	TRUE	-0.140056	0.893199	-0.0490518	3320.48	3573.82	2979.07	3635.76	3553.82	677.085	-253.344	0.929111	-0.0319323
sp|Q64433|CH10_MOUSE			10 kDa heat shock protein, mitochondrial OS=Mus musculus OX=10090 GN=Hspe1 PE=1 SV=2	TRUE	-0.130381	0.900527	-0.0455034	19856.9	20684	19435.4	16319.2	5306.43	11525.1	-827.139	0.960011	-0.0177239
sp|P68033|ACTC_MOUSE			Actin, alpha cardiac muscle 1 OS=Mus musculus OX=10090 GN=Actc1 PE=1 SV=1	TRUE	0.129903	0.900889	-0.0453289	14771.6	13273.9	9887.22	12746.7	17206.4	15351.5	1497.74	1.11283	0.0464301
sp|Q9Z0M6|AGRE5_MOUSE			Adhesion G protein-coupled receptor E5 OS=Mus musculus OX=10090 GN=Adgre5 PE=1 SV=2	TRUE	0.121254	0.907449	-0.0421779	28800.4	28044	29165.1	26247.2	3649.45	11931.3	756.443	1.02697	0.0115592
sp|Q99KC8|VMA5A_MOUSE			von Willebrand factor A domain-containing protein 5A OS=Mus musculus OX=10090 GN=Vwa5a PE=1 SV=2	TRUE	-0.115608	0.911736	-0.0401311	21151.6	23325.9	3392.51	24541.4	35787.9	11580.4	-2174.29	0.906787	-0.0424949
sp|Q91ZJ5|UGPA_MOUSE			UTP--glucose-1-phosphate uridylyltransferase OS=Mus musculus OX=10090 GN=Ugp2 PE=1 SV=3	TRUE	0.110543	0.915583	-0.0383021	9192.36	8755.27	5384.46	8731.89	7741.74	1613.63	437.095	1.04992	0.0211577
sp|O89053|COR1A_MOUSE			Coronin-1A OS=Mus musculus OX=10090 GN=Coro1a PE=1 SV=5	TRUE	-0.10971	0.916217	-0.0380016	1140.41	1185.07	1153.49	1153.81	636.529	507.563	-44.6584	0.962316	-0.0166824
sp|Q9WUZ5|TNNI1_MOUSE			Troponin I, slow skeletal muscle OS=Mus musculus OX=10090 GN=Tnni1 PE=1 SV=3	TRUE	0.104721	0.92001	-0.0362073	2252.92	2207.98	2093.67	2165.41	427.858	744.128	44.9444	1.02036	0.00875147
sp|Q9R111|GUAD_MOUSE			Guanine deaminase OS=Mus musculus OX=10090 GN=Gda PE=1 SV=1	TRUE	0.101491	0.922468	-0.0350488	38417.6	37747.9	38565.3	35307.7	8393.8	10185.4	669.756	1.01774	0.00763807
sp|P36552|HEM6_MOUSE			Oxygen-dependent coproporphyrinogen-III oxidase, mitochondrial OS=Mus musculus OX=10090 GN=Cpox PE=1 SV=2	TRUE	0.0997794	0.92377	-0.0344362	54958.4	52527	39348.2	51399.5	46041.4	15979.1	2431.4	1.04629	0.0196515
sp|P11499|HS90B_MOUSE			Heat shock protein HSP 90-beta OS=Mus musculus OX=10090 GN=Hsp90ab1 PE=1 SV=3	TRUE	0.0982222	0.924955	-0.0338794	3772.44	3674.73	3023.25	3437.26	1854.25	720.937	97.7049	1.02659	0.0113963
sp|Q8R1G2|CMBL_MOUSE			Carboxymethylenebutenolidase homolog OS=Mus musculus OX=10090 GN=Cmbl PE=1 SV=1	TRUE	0.0946917	0.927643	-0.0326192	418.989	408.555	458.623	410.243	128.373	179.115	10.4335	1.02554	0.0109515
sp|P07356|ANXA2_MOUSE			Annexin A2 OS=Mus musculus OX=10090 GN=Anxa2 PE=1 SV=2	TRUE	0.0913739	0.93017	-0.0314378	24285.8	23421.3	17717.4	22359.7	15963.3	10159.4	864.487	1.03691	0.0157412
sp|P24527|LKHA4_MOUSE			Leukotriene A-4 hydrolase OS=Mus musculus OX=10090 GN=Lta4h PE=1 SV=4	TRUE	0.0859502	0.934302	-0.0295125	103767	98465.3	53976.9	93263.4	121933	18714	5301.44	1.05384	0.022775
sp|P31786|ACBP_MOUSE			Acyl-CoA-binding protein OS=Mus musculus OX=10090 GN=Dbi PE=1 SV=2	TRUE	0.0837456	0.935983	-0.0287321	3054.85	2861.47	2443.17	2451.35	3237.76	3293.11	193.377	1.06758	0.0284002
sp|Q71LX4|TLN2_MOUSE			Talin-2 OS=Mus musculus OX=10090 GN=Tln2 PE=1 SV=3	TRUE	0.0777315	0.940569	-0.0266093	806.389	767.201	396.939	748.912	895.945	462.51
sp|Q8VHX6|FLNC_MOUSE			Filamin-C OS=Mus musculus OX=10090 GN=Flnc PE=1 SV=3	TRUE	0.0748553	0.942763	-0.0255974	238321	226953	94617.2	244295	300362	45068.2	11367.7	1.05009	0.0212258
sp|P09242|PPBT_MOUSE			Alkaline phosphatase, tissue-nonspecific isozyme OS=Mus musculus OX=10090 GN=Alpl PE=1 SV=2	TRUE	0.0709913	0.945712	-0.0242412	176855	169013	87172.8	164142	200713	92293.9	7841.55	1.0464	0.0196961
sp|Q9JKS4-4|LDB3_MOUSE			Isoform 4 of LIM domain-binding protein 3 OS=Mus musculus OX=10090 GN=Ldb3	TRUE	0.064761	0.950468	-0.0220625	76973.1	75246.2	63440.8	88851.9	32791.2	42060.5	1726.93	1.02295	0.00985458
sp|Q9Z0J0|NPC2_MOUSE			NPC intracellular cholesterol transporter 2 OS=Mus musculus OX=10090 GN=Npc2 PE=1 SV=1	TRUE	-0.0592186	0.954701	-0.0201326	16921.8	17249	17672.6	15359.5	6785.91	8722.52	-327.221	0.98103	-0.00831791
sp|Q9CY02|AHSP_MOUSE			Alpha-hemoglobin-stabilizing protein OS=Mus musculus OX=10090 GN=Ahsp PE=1 SV=1	TRUE	-0.0508573	0.96109	-0.0172359	5316.34	5434.27	3550.77	4714.07	3844	2594.48	-117.929	0.978299	-0.00952838
sp|Q60597|ODO1_MOUSE			2-oxoglutarate dehydrogenase, mitochondrial OS=Mus musculus OX=10090 GN=Ogdh PE=1 SV=3	TRUE	-0.0499248	0.961803	-0.016914	37907.7	39512.5	37497.1	10550.4	24433.1	59464.3	-1604.79	0.959385	-0.0180069
sp|O70624|MYOC_MOUSE			Myocilin OS=Mus musculus OX=10090 GN=Myoc PE=1 SV=1	TRUE	0.048448	0.962932	-0.0164045	9396.08	9242.4	8523.43	10027.1	3161.77	5500.29	153.684	1.01663	0.00716212
sp|P00493|HPRT_MOUSE			Hypoxanthine-guanine phosphoribosyltransferase OS=Mus musculus OX=10090 GN=Hprt1 PE=1 SV=3	TRUE	-0.0474598	0.963687	-0.016064	1.07146e+06	1.13056e+06	10561.6	1.06137e+06	2.12674e+06	1.29644e+06	-59105.1	0.947721	-0.0233197
sp|Q9CQS8|SC61B_MOUSE			Protein transport protein Sec61 subunit beta OS=Mus musculus OX=10090 GN=Sec61b PE=1 SV=3	TRUE	0.0380491	0.970883	-0.0128331	11520	11277.5	7702.74	11081.7	12404.1	2931.97	242.486	1.0215	0.00923911
sp|P10493|NID1_MOUSE			Nidogen-1 OS=Mus musculus OX=10090 GN=Nid1 PE=1 SV=2	TRUE	0.0344511	0.973635	-0.0116038	9491.98	9297.93	5749.28	6772.8	7560.31	8351.03	194.044	1.02087	0.00897027
sp|Q62165|DAG1_MOUSE			Dystroglycan OS=Mus musculus OX=10090 GN=Dag1 PE=1 SV=4	TRUE	-0.028857	0.977915	-0.0096991	18080	18423.4	10569.7	15524	21435.7	10337.5	-343.372	0.981362	-0.00817067
sp|P97371|PSME1_MOUSE			Proteasome activator complex subunit 1 OS=Mus musculus OX=10090 GN=Psme1 PE=1 SV=2	TRUE	-0.0251073	0.980784	-0.00842681	36620.6	36988.6	23800.9	35600.8	28397	7280.04	-368.014	0.990051	-0.00434261
sp|O35350|CAN1_MOUSE			Calpain-1 catalytic subunit OS=Mus musculus OX=10090 GN=Capn1 PE=1 SV=1	TRUE	0.0239299	0.981685	-0.00802805	8211.42	8096.69	5388.65	8078.64	6931.46	6625.71	114.73	1.01417	0.00611073
sp|Q9Z172|SUMO3_MOUSE			Small ubiquitin-related modifier 3 OS=Mus musculus OX=10090 GN=Sumo3 PE=1 SV=1	TRUE	0.0125472	0.990396	-0.00419117	3336.32	3311.02	3289.67	1672.77	809.464	3950.14	25.2965	1.00764	0.00330544
sp|P62827|RAN_MOUSE			GTP-binding nuclear protein Ran OS=Mus musculus OX=10090 GN=Ran PE=1 SV=3	TRUE	0.00348786	0.99733	-0.00116104	40849	40731.6	15159.4	44614.4	56753.7	36166.2	117.362	1.00288	0.00124956
sp|P70296|PEBP1_MOUSE			Phosphatidylethanolamine-binding protein 1 OS=Mus musculus OX=10090 GN=Pebp1 PE=1 SV=3	TRUE	-0.00332889	0.997452	-0.00110806	88342.7	88484.9	49330.4	86751.2	82819.6	20786	-142.124	0.998394	-0.000698122
sp|P11247|PERM_MOUSE			Myeloperoxidase OS=Mus musculus OX=10090 GN=Mpo PE=1 SV=2	TRUE	0.0010545	0.999193	-0.000350695	130194	130124	139128	102386	60019.4	119123	70.3289	1.00054	0.000234663
sp|Q9CY58|PAIRB_MOUSE			Plasminogen activator inhibitor 1 RNA-binding protein OS=Mus musculus OX=10090 GN=Serbp1 PE=1 SV=2	TRUE	2.40525e-06	0.999998	-7.99606e-07	16879.6	16879.6	3249.43	8017.36	29036.1	19414.2	0.0420059	1	1.08077e-06
