# Supplementary material for: Morquio A Syndrome: Identification of Differential Patterns of Molecular Pathway Interactions in Bone Lesions
Source: Int J Mol Sci. 2024 Mar 12;25(6):3232. doi: 10.3390/ijms25063232 (PMC10970612; doi:10.3390/ijms25063232)
Supplement: Supplementary file 1 [file ijms-25-03232-s001.zip › supplementary Table S4.xlsx]

## Sheet: SWATH-MS DEPs
Uniprot code	Gene name	Protein Name	SWATH (T-student)
			P_value	FC
P06745	Gpi	Glucose-6-phosphate isomerase	0.0043	3.2287
P05064	Aldoa	Fructose-bisphosphate aldolase A	0.0375	18.7808
P13707	Gpd1	Glycerol-3-phosphate dehydrogenase [NAD(+)], cytoplasmic	0.0520	1.4896
Q9D0F9	Pgm1	Phosphoglucomutase-1	0.0205	1.9249
P17182	Eno1	Alpha-enolase	0.0121	0.2793
P21550	Eno3	Beta-enolase	0.0525	4.5256
P06151	Ldha	L-lactate dehydrogenase A chain	0.0434	9.0581
P16125	Ldhb	L-lactate dehydrogenase B chain	0.0089	2.5319
Q9D051	Pdhb	Pyruvate dehydrogenase E1 component subunit beta, mitochondrial	0.0362	0.3913
Q9D6R2	Idh3a	Isocitrate dehydrogenase [NAD] subunit alpha, mitochondrial	0.0144	3.427
Q8K2B3	Sdha	Succinate dehydrogenase [ubiquinone] flavoprotein subunit, mitochondrial	0.0327	2.6715
P08249	Mdh2	Malate dehydrogenase, mitochondrial	0.0426	19.0472
P42125	Eci1	Enoyl-CoA delta isomerase 1, mitochondrial	0.0023	0.6253
P11404	Fabp3	Fatty acid-binding protein, heart	0.0490	33.7581
P50544	Acadvl	Very long-chain specific acyl-CoA dehydrogenase, mitochondrial	0.0226	3.4695
Q9CQZ5	Ndufa6	NADH dehydrogenase [ubiquinone] 1 alpha subcomplex subunit 6	0.0246	86.514
Q9ERS2	Ndufa13	NADH dehydrogenase [ubiquinone] 1 alpha subcomplex subunit 13	0.0166	8.1749
Q9CQJ8	Ndufb9	NADH dehydrogenase [ubiquinone] 1 beta subcomplex subunit 9	0.0246	3.39
Q9CQ54	Ndufc2	NADH dehydrogenase [ubiquinone] 1 subunit C2	0.0452	3.5213
Q91VD9	Ndufs1	NADH-ubiquinone oxidoreductase 75 kDa subunit, mitochondrial	0.0199	2.0976
Q91YT0	Ndufv1	NADH dehydrogenase [ubiquinone] flavoprotein 1, mitochondrial	0.0340	3.9303
Q8K2B3	Sdha	Succinate dehydrogenase [ubiquinone] flavoprotein subunit, mitochondrial	0.0327	2.6715
Q9CQA3	Sdhb	Succinate dehydrogenase [ubiquinone] iron-sulfur subunit, mitochondrial	0.0028	14.5768
Q9CR68	Uqcrfs1	Cytochrome b-c1 complex subunit Rieske, mitochondrial	0.0552	1.5274
P12787	Cox5a	Cytochrome c oxidase subunit 5A, mitochondrial	0.0106	5.6382
P43023	Cox6a2	Cytochrome c oxidase subunit 6A2, mitochondrial	0.0177	5.132
P56391	Cox6b1	Cytochrome c oxidase subunit 6B1	0.0034	2.5879
Q9CPQ1	Cox6c	Cytochrome c oxidase subunit 6C	0.0937	0.6478
P48771	Cox7a2	Cytochrome c oxidase subunit 7A2, mitochondrial	0.0359	5.1496
Q9D3D9	Atp5f1d	ATP synthase subunit delta, mitochondrial	0.0039	5.1416
P56135	Atp5mf	ATP synthase subunit f, mitochondrial	0.0369	12.1206
Q9CQQ7	Atp5pb	ATP synthase F(0) complex subunit B1, mitochondrial	0.0228	2.1821
Q9DCX2	Atp5pd	ATP synthase subunit d, mitochondrial	0.0017	2.1766
Q9DB20	Atp5po	ATP synthase subunit O, mitochondrial	0.0309	6.7524
Q78IK2	Atp5mk	ATP synthase membrane subunit K, mitochondrial	0.0457	0.2169
P08228	Sod1	Superoxide dismutase [Cu-Zn]	0.0160	9.836
P35700	Prdx1	Peroxiredoxin-1	0.0069	3.4018
Q61171	Prdx2	Peroxiredoxin-2	0.0051	8.0147
P20108	Prdx3	Thioredoxin-dependent peroxide reductase, mitochondrial	0.0265	24.7061
P99029	Prdx5	Peroxiredoxin-5	0.0263	6.4456
P27005	S100a8	Protein S100-A8	0.0062	2.9169
P31725	S100a9	Protein S100-A9	0.0300	17.3367
Q921I1	Tf	Serotransferrin	0.004	4.455
Q91WS0	Cisd1	CDGSH iron-sulfur domain-containing protein 1	0.023	7.278
P09528	Fth1	Ferritin heavy chain	0.0287	17.2605
P04247	Mb	Myoglobin	0.0455	33.443
P02088	Hbb-b1	Hemoglobin subunit beta-1	0.043	7.706
Q61646	Hp	Haptoglobin	0.012	2.706
Q91X72	Hpx	Hemopexin	0.002	7.352
P17751	Tpi1	Triosephosphate isomerase	0.0225	16.6208
P0CG50	Ubb	Polyubiquitin-B	0.0088	39.5216
P61089	Ube2n	Ubiquitin-conjugating enzyme E2 N	0.0386	3.9333
Q80X90	Flnb	Filamin-B	0.0466	0.4545
P10922	H1-0	Histone H1.0	2.09E-06	15.7769
P43275	H1-1	Histone H1.1	0.0124	2.6155
P15864	H1-2	Histone H1.2	0.0158	14.7239
P43274	H1-4	Histone H1.4	0.0263	32.3093
Q3THW5	H2az2	Histone H2A.V	0.0332	10.3191
P62806	H4c1	Histone H4	0.02761	22.0122
P97461	Rps5	40S ribosomal protein S5	0.0178	9.3185
P62270	Rps18	40S ribosomal protein S18	0.0358	3.2491
Q9CZX8	Rps19	40S ribosomal protein S19	0.0317	1.9008
P60867	Rps20	40S ribosomal protein S20	0.0305	2.0351
P62852	Rps25	40S ribosomal protein S25	0.0425	5.4571
P35979	Rpl12	60S ribosomal protein L12	0.0281	6.4042
P97372	Psme2	Proteasome activator complex subunit 2	0.0009	2.0607
P35278	Rab5c	Ras-related protein Rab-5C	0.0026	4.2406
P46638	Rab11b	Ras-related protein Rab-11B	0.0040	2.4525
Q9CYZ2	Tpd52l2	Tumor protein D54	0.0383	7.4121
P24668	M6pr	Cation-dependent mannose-6-phosphate receptor	0.0047	3.2882
P11438	Lamp1	Lysosome-associated membrane glycoprotein 1	0.0098	2.7102
P16045	Lgals1	Galectin-1	0.0179	9.2213
P16110	Lgals3	Galectin-3	0.0260	3.2915
Q9WV54	Asah1	Acid ceramidase	0.0527	0.1694
P0DP28	Calm3	Calmodulin-3	0.0244	0.1649
P68134	Acta1	Actin, alpha skeletal muscle	0.0527	0.1694
P10833	Rras	Ras-related protein R-Ras	0.0029	2.6307
Q62234	Myom1	Myomesin-1	0.0376	0.4040
P97457	Myfpl	Myosin regulatory light chain 2, skeletal muscle isoform	0.0188	9.3929
P51667	Myl2	Myosin regulatory light chain 2, ventricular/cardiac muscle isoform	0.0371	5.4004
Q61792	Lasp1	LIM and SH3 domain protein 1	0.0050	3.2746
P20801	Tnnc2	Troponin C, skeletal muscle	0.0301	0.2303
P47754	Capza2	F-actin-capping protein subunit alpha-2	0.0335	2.2634
P26039	Tln1	Talin-1	0.0309	1.7377
Q9QUI0	Rhoa	Transforming protein RhoA	0.0080	4.4309
Q9ESM6	Gdpd2	Glycerophosphoinositol inositolphosphodiesterase GDPD2	0.0305	0.0173
Q9JM76	Arpc3	Actin-related protein 2/3 complex subunit 3	0.0012	3.9724
Q9CPW4	Arpc5	Actin-related protein 2/3 complex subunit 5	0.0179	9.5173
Q9D898	Arpc5l	Actin-related protein 2/3 complex subunit 5-like protein	0.0088	3.0402
Q9QUP5	Hapln1	Hyaluronan and proteoglycan link protein 1	0.0140	1.7277
P28654	Dcn	Decorin	0.0005	3.0871
P50608	Fmod	Fibromodulin	0.0450	6.9376
P51885	Lum	Lumican	0.0175	20.7626
Q9JK53	Prelp	Prolargin	0.0174	15.2827
O35367	Kera	Keratocan	0.0383	12.1981
O55226	Chad	Chondroadherin	0.0446	2.0533
P11087	Col1a1	Collagen alpha-1(I) chain	0.0137	24.3614
Q01149	Col1a2	Collagen alpha-2(I) chain	0.0360	70.2564
P28481	Col2a1	Collagen alpha-1(II) chain	0.0120	2.1669
Q61245	Col11a1	Collagen alpha-1(XI) chain	0.0187	12.453
Q64739	Col11a2	Collagen alpha-2(XI) chain	0.0161	10.736
P35441	Thbs1	Thrombospondin-1	0.0309	10.4717
Q05793	Hspg2	Basement membrane-specific heparan sulfate proteoglycan core protein	0.0346	2.8603
P41245	Mmp9	Matrix metalloproteinase-9	0.0125	5.5616
Q91X72	Hpx	Hemopexin	0.0021	7.352
P07759	Serpina3k	Serine protease inhibitor A3K	0.0413	1.0905
Q9D154	Serpinb1a	Leukocyte elastase inhibitor A	0.0264	2.9116
P97298	Serpinf1	Pigment epithelium-derived factor	0.0469	9.2363
P18242	Ctsd	Cathepsin D	0.0489	5.5031
P49935	Ctsh	Pro-cathepsin H	0.0226	3.8861
Q61738	Itga7	Integrin alpha-7	0.0140	1.966
P05555	Itgam	Integrin alpha-M	0.0038	3.7745
P43406	Itgav	Integrin alpha-V	0.0018	3.5819
P11835	Itgb2	Integrin beta-2	0.0266	2.6178
P29533	Vcam1	Vascular cell adhesion protein 1	0.0375	0.3312
P60766	Cdc42	Cell division control protein 42	0.0287	2.5824
P31428	Dpep1	Dipeptidase 1	0.0258	79.0435
O70622	Rtn2	Reticulon-2	0.0388	4.6641
Q9QXC1	Fetub	Fetuin-B	0.0420	11.0009
P07724	Alb	Albumin	0.0332	27.5579
Q6P8J7	Ckmt2	Creatine kinase S-type, mitochondrial	0.0354	8.4023

## Sheet: Spectral count DEPS
Protein	Code	Protein Name	Scaffold (Fisher's Exact Test)
			P_value	FC
P13707	Gpd1	Glycerol-3-phosphate dehydrogenase [NAD(+)], cytoplasmic	0.0012	1.6
Q64521	Gpd2	Glycerol-3-phosphate dehydrogenase, mitochondrial	0.00033	1.5
P09411	Pgk1	Phosphoglycerate kinase 1	0.0013	0.9
O70250	Pgam2	Phosphoglycerate mutase 2	0.00016	0.7
Q9D0F9	Pgm1	Phosphoglucomutase-1	<0.00010	1.1
P21550	Eno3	Beta-enolase	< 0.00010	1.1
P06151	Ldha	L-lactate dehydrogenase A chain	< 0.00010	1.1
P16125	Ldhb	L-lactate dehydrogenase B chain	< 0.00010	2.2
Q8BKZ9	Pdhx	Pyruvate dehydrogenase protein X component, mitochondrial	0.016	2.7
Q9CZU6	Cs	Citrate synthase, mitochondrial	< 0.00010	1.2
Q99KI0	Aco2	Aconitate hydratase, mitochondrial	0.021	0.8
O88844	Idh1	Isocitrate dehydrogenase [NADP] cytoplasmic	0.0018	1.2
Q9Z2I9	Sucla2	Succinate--CoA ligase [ADP-forming] subunit beta, mitochondrial	0.0023	INF UP in UNT
Q8K2B3	Sdha	Succinate dehydrogenase [ubiquinone] flavoprotein subunit, mitochondrial	< 0.00010	1.5
P08249	Mdh2	Malate dehydrogenase, mitochondrial	< 0.00010	1.1
P50544	Acadvl	Very long-chain specific acyl-CoA dehydrogenase, mitochondrial	< 0.00010	1.5
P11404	Fabp3	Fatty acid-binding protein, heart	< 0.00010	1.3
Q62425	Ndufa4	Cytochrome c oxidase subunit NDUFA4	0.01	1.1
Q9ERS2	Ndufa13	NADH dehydrogenase [ubiquinone] 1 alpha subcomplex subunit 13	0.011	1.4
Q9CQJ8	Ndufb9	NADH dehydrogenase [ubiquinone] 1 beta subcomplex subunit 9	0.00011	INF
Q9CXZ1	Ndufs4	NADH dehydrogenase [ubiquinone] iron-sulfur protein 4, mitochondrial	0.053	1.5
P52503	Ndufs6	NADH dehydrogenase [ubiquinone] iron-sulfur protein 6, mitochondrial	0.043	1.1
Q91YT0	Ndufv1	NADH dehydrogenase [ubiquinone] flavoprotein 1, mitochondrial	< 0.00010	2.4
Q8K2B3	Sdha	Succinate dehydrogenase [ubiquinone] flavoprotein subunit, mitochondrial	< 0.00010	1.5
Q921G7	Etfdh	Electron transfer flavoprotein-ubiquinone oxidoreductase, mitochondrial	0.017	INF
Q9D855	Uqcrb	Cytochrome b-c1 complex subunit 7	< 0.00010	1.6
P12787	Cox5a	Cytochrome c oxidase subunit 5A, mitochondrial	< 0.00010	1.4
P43023	Cox6a2	Cytochrome c oxidase subunit 6A2, mitochondrial	0.00084	INF
P56391	Cox6b1	Cytochrome c oxidase subunit 6B1	< 0.00010	1.4
P48771	Cox7a2	Cytochrome c oxidase subunit 7A2, mitochondrial	0.049	1.4
Q91VR2	Atp5f1c	ATP synthase subunit gamma, mitochondrial	0.00021	6
Q9CQQ7	Atp5pb	ATP synthase F(0) complex subunit B1, mitochondrial	0.00068	1.7
P97450	Atp5pf	ATP synthase-coupling factor 6, mitochondrial	0.032	2.3
Q9DB20	Atp5po	ATP synthase subunit O, mitochondrial	0.00016	1.1
O08532	Cacna2d1	Voltage-dependent calcium channel subunit alpha-2/delta-1	0.047	0.7
Q91WS0	Cisd1	CDGSH iron-sulfur domain-containing protein 1	0.015	1.6
Q62351	Tfrc	Transferrin receptor protein 1	< 0.00010	0.2
P04247	Mb	Myoglobin	< 0.00010	1.2
Q9CY02	Ahsp	Alpha-hemoglobin-stabilizing protein	0.071	0.3
P10922	H1-0	Histone H1.0	0.018	1.3
P63325	Rps10	40S ribosomal protein S10	0.0078	0.4
P62852	Rps25	40S ribosomal protein S25	0.006	1.1
Q9CR57	Rpl14	60S ribosomal protein L14	0.0063	INF
P47915	Rpl29	60S ribosomal protein L29	0.032	2
P05213	Tuba1b	Tubulin alpha-1B chain	< 0.00010	0.1
P68134	Acta1	Actin, alpha skeletal muscle	< 0.00010	0.9
P97457	Myl11	Myosin regulatory light chain 2, skeletal muscle isoform	< 0.00010	1.1
P51667	Myl2	Myosin regulatory light chain 2, ventricular/cardiac muscle isoform	0.0016	1.1
Q61792	Lasp1	LIM and SH3 domain protein 1	0.065	1.1
P20801	Tnnc2	Troponin C, skeletal muscle	< 0.00010	0.2
Q9QZ47	Tnnt3	Troponin T, fast skeletal muscle	0.00028	1.2
Q9WUZ5	Tnni1	Troponin I, slow skeletal muscle	0.017	INF
Q80X90	Flnb	Filamin-B	0.00011	0.3
P10107	Anxa1	Annexin A1	0.00043	0.3
P48036	Anxa5	Annexin A5	0.0028	0
Q07076	Anxa7	Annexin A7	0.00021	6
P47753	Capza1	F-actin-capping protein subunit alpha-1	0.042	0
Q71LX4	Tln2	Talin-2	< 0.00010	0
Q9ESM6	Gdpd2	Glycerophosphoinositol inositolphosphodiesterase GDPD2	0.084	0.2
Q9R1P4	Psma1	Proteasome subunit alpha type-1	0.0044	0
P49722	Psma2	Proteasome subunit alpha type-2	0.027	0
O70435	Psma3	Proteasome subunit alpha type-3	0.017	0
Q9R1P0	Psma4	Proteasome subunit alpha type-4	0.025	0.1
Q9Z2U1	Psma5	Proteasome subunit alpha type-5	0.0089	0.1
Q9QUM9	Psma6	Proteasome subunit alpha type-6	< 0.00010	0
Q9Z2U0	Psma7	Proteasome subunit alpha type-7	0.0018	0
O09061	Psmb1	Proteasome subunit beta type-1	0.007	0
Q9R1P3	Psmb2	Proteasome subunit beta type-2	0.007	0
Q60692	Psmb6	Proteasome subunit beta type-6	0.067	0
Q9CX56	Psmd8	26S proteasome non-ATPase regulatory subunit 8	0.048	INF
P97371	Psme1	Proteasome activator complex subunit 1	< 0.00010	0.2
P61290	Psme3	Proteasome activator complex subunit 3	< 0.00010	0.06
P62821	Rab1A	Ras-related protein Rab-1A	0.035	0.3
Q9D1G1	Rab1b	Ras-related protein Rab-1B	< 0.00010	0
P35279	Rab6a	Ras-related protein Rab-6A	0.0063	INF
P61027	Rab10	Ras-related protein Rab-10	0.016	0.2
Q9QZ88	Vps29	Vacuolar protein sorting-associated protein 29	0.0063	4
O70439	Stx7	Syntaxin-7	0.063	0.2
P41731	Cd63	CD63 antigen	0.011	0
P04441	Cd74	H-2 class II histocompatibility antigen gamma chain	0.007	0
P50516	Atp6v1a	V-type proton ATPase catalytic subunit A	0.007	0
O35114	Scarb2	Lysosome membrane protein 2	0.09	0.3
P16045	Lgals1	Galectin-1	0.0041	1.1
P16110	Lgals3	Galectin-3	0.069	1.1
Q07797	Lgals3bp	Galectin-3-binding protein	0.00041	0.1
Q9WV54	Asah1	Acid ceramidase	0.028	0.3
P12265	Gusb	Beta-glucuronidase	< 0.00010	0.05
Q571E4	Galns	N-acetylgalactosamine-6-sulfatase	0.007	0
Q60648	Gm2a	Ganglioside GM2 activator	0.0033	0.06
O09159	Man2b1	Lysosomal alpha-mannosidase	0.00011	0.2
Q8VCI0	Plbd1	Phospholipase B-like	0.00012	0.2
Q8VEB4	Pla2g15	Phospholipase A2 group XV	0.011	0
Q5FWI3	Cemip2	Cell surface hyaluronidase	0.048	INF
Q9QUP5	Hapln1	Hyaluronan and proteoglycan link protein 1	< 0.00010	1.7
Q61282	Acan	Aggrecan core protein	0.027	0.9
Q99MQ4	Aspn	Asporin	< 0.00010	INF
O55226	Chad	Chondroadherin	0.0009	1.1
P08121	Col3a1	Collagen alpha-1(III) chain	0.068	0.7
Q05722	Col9a1	Collagen alpha-1(IX) chain	0.00011	INF
Q63870	Col7a1	Collagen alpha-1(VII) chain	< 0.00010	INF
Q04857	Col6a1	Collagen alpha-1(VI) chain	0.0061	0.8
Q02788	Col6a2	Collagen alpha-2(VI) chain	< 0.00010	1.4
Q2UY11	Col28a1	Collagen alpha-1(XXVIII) chain	0.048	INF
Q60675	Lama2	Laminin subunit alpha-2	0.032	0.2
Q80Z71	Tnn	Tenascin-N	< 0.00010	1.4
Q9DAW9	Cnn3	Calponin-3	0.007	0
P26043	Rdx	Radixin	0.0044	0
P26041	Msn	Moesin	0.0044	0
Q9CY58	Serbp1	Plasminogen activator inhibitor 1 RNA-binding protein	0.084	0.2
P26595	Serpina1	Alpha-1-antiproteinase	< 0.00010	0
Q00896	Serpina1c	Alpha-1-antitrypsin 1-3	0.0073	0.5
Q61247	Serpinf2	Alpha-2-antiplasmin	0.047	0.2
P10605	Ctsb	Cathepsin B	0.0011	0.3
Q62469	Itga2	Integrin alpha-2	0.027	0
Q9QUM0	Itga2b	Integrin alpha-IIb	< 0.00010	0.1
P24063	Itgal	Integrin alpha-L	0.0043	2.4
Q3UV74	Itgb2l	Integrin beta-2-like protein	0.0098	0.2
P29533	Vcam1	Vascular cell adhesion protein 1	0.00073	0
P60766	Cdc42	Cell division control protein 42	0.01	1.1
O70622	Rtn2	Reticulon-2	< 0.00010	1.1
Q6P8J7	Ckmt2	Creatine kinase S-type, mitochondrial	< 0.00010	1.3

## Sheet: DEPS Validation
Protein	Code	Protein Name	Scaffold (Fisher's Exact Test)		SWATH(T student)
			P_value	FC	P_value	FC
P13707	Gpd1	Glycerol-3-phosphate dehydrogenase [NAD(+)], cytoplasmic	0.0012	1.6	0.052	1.4896
Q9D0F9	Pgm1	Phosphoglucomutase-1	<0.00010	1.1	0.0205	1.9249
P21550	Eno3	Beta-enolase	< 0.00010	1.1	0.0525	4.5256
P06151	Ldha	L-lactate dehydrogenase A chain	< 0.00010	1.1	0.0434	9.0581
P16125	Ldhb	L-lactate dehydrogenase B chain	< 0.00010	2.2	0.0089	2.5319
Q8K2B3	Sdha	Succinate dehydrogenase [ubiquinone] flavoprotein subunit, mitochondrial	< 0.00010	1.5	0.0327	2.6715
P08249	Mdh2	Malate dehydrogenase, mitochondrial	< 0.00010	1.1	0.0426	19.0472
P50544	Acadvl	Very long-chain specific acyl-CoA dehydrogenase, mitochondrial	< 0.00010	1.5	0.0226	3.4695
P11404	Fabp3	Fatty acid-binding protein, heart	< 0.00010	1.3	0.049	33.7581
Q9ERS2	Ndufa13	NADH dehydrogenase [ubiquinone] 1 alpha subcomplex subunit 13	0.011	1.4	0.0166	8.1749
Q9CQJ8	Ndufb9	NADH dehydrogenase [ubiquinone] 1 beta subcomplex subunit 9	0.00011	INF	0.0246	3.39
Q91YT0	Ndufv1	NADH dehydrogenase [ubiquinone] flavoprotein 1, mitochondrial	< 0.00010	2.4	0.034	3.9303
Q8K2B3	Sdha	Succinate dehydrogenase [ubiquinone] flavoprotein subunit, mitochondrial	< 0.00010	1.5	0.0327	2.6715
P12787	Cox5a	Cytochrome c oxidase subunit 5A, mitochondrial	< 0.00010	1.4	0.0106	5.6382
P43023	Cox6a2	Cytochrome c oxidase subunit 6A2, mitochondrial	0.00084	INF	0.0177	5.132
P56391	Cox6b1	Cytochrome c oxidase subunit 6B1	< 0.00010	1.4	0.0034	2.5879
P48771	Cox7a2	Cytochrome c oxidase subunit 7A2, mitochondrial	0.049	1.4	0.0359	5.1496
Q9CQQ7	Atp5pb	ATP synthase F(0) complex subunit B1, mitochondrial	0.00068	1.7	0.0228	2.1821
Q9DB20	Atp5po	ATP synthase subunit O, mitochondrial	0.00016	1.1	0.0309	6.7524
Q91WS0	Cisd1	CDGSH iron-sulfur domain-containing protein 1	0.015	1.6	0.023	7.278
P04247	Mb	Myoglobin	< 0.00010	1.2	0.0455	33.443
P10922	H1-0	Histone H1.0	0.018	1.3	2.09e-06	15.7769
P62852	Rps25	40S ribosomal protein S25	0.006	1.1	0.0425	5.4571
P68134	Acta1	Actin, alpha skeletal muscle	< 0.00010	0.9	0.0527	0.1694
P97457	Myl11	Myosin regulatory light chain 2, skeletal muscle isoform	< 0.00010	1.1	0.0188	9.3929
P51667	Myl2	Myosin regulatory light chain 2, ventricular/cardiac muscle isoform	0.0016	1.1	0.0371	5.4004
Q61792	Lasp1	LIM and SH3 domain protein 1	0.065	1.1	0.005	3.2746
P20801	Tnnc2	Troponin C, skeletal muscle	< 0.00010	0.2	0.0301	0.2303
Q80X90	Flnb	Filamin-B	0.00011	0.3	0.0466	0.4545
Q9ESM6	Gdpd2	Glycerophosphoinositol inositolphosphodiesterase GDPD2	0.084	0.2	0.0305	0.0173
P16045	Lgals1	Galectin-1	0.0041	1.1	0.0179	9.2213
P16110	Lgals3	Galectin-3	0.069	1.1	0.026	3.2915
Q9WV54	Asah1	Acid ceramidase	0.028	0.3	0.0527	0.1694
Q9QUP5	Hapln1	Hyaluronan and proteoglycan link protein 1	< 0.00010	1.7	0.014	1.7277
O55226	Chad	Chondroadherin	0.0009	1.1	0.0446	2.0533
P29533	Vcam1	Vascular cell adhesion protein 1	0.00073	0	0.0375	0.3312
P60766	Cdc42	Cell division control protein 42	0.01	1.1	0.0287	2.5824
O70622	Rtn2	Reticulon-2	< 0.00010	1.1	0.0388	4641
Q6P8J7	Ckmt2	Creatine kinase S-type, mitochondrial	< 0.00010	1.3	0.0354	8.4023
