# Supplementary material for: Morquio A Syndrome: Identification of Differential Patterns of Molecular Pathway Interactions in Bone Lesions
Source: Int J Mol Sci. 2024 Mar 12;25(6):3232. doi: 10.3390/ijms25063232 (PMC10970612; doi:10.3390/ijms25063232)
Supplement: Supplementary file 1 [file ijms-25-03232-s001.zip › supplementary Table S5.xlsx]

## Sheet: UNT
Protein name	Uniprot Code	Peptides(95%)	%Cov
Myosin-4	Q5SX39	141	59.98
Filamin-A	Q8BTM8	74	36.99
Collagen alpha-2(I) chain	Q01149	777	81.27
Albumin	P07724	319	84.87
Collagen alpha-1(I) chain	P11087	950	72.26
Collagen alpha-1(XII) chain	Q60847	40	27.63
Titin	A2ASS6	36	3.158
Creatine kinase M-type	P07310	218	95.54
Talin-1	P26039	38	31.72
Alpha-actinin-3	O88990	47	53.11
Serotransferrin	Q921I1	68	50.07
Pregnancy zone protein	Q61838	44	37.39
Vinculin	Q64727	37	47.75
Fructose-bisphosphate aldolase A	P05064	77	91.48
Filamin-C	Q8VHX6	43	25.75
Beta-enolase	P21550	76	69.12
Nascent polypeptide-associated complex subunit alpha, muscle-specific form	P70670	31	29.22
Lactotransferrin	P08071	32	55.3
Actin, alpha skeletal muscle	P68135	288	76.39
Sarcoplasmic/endoplasmic reticulum calcium ATPase 1	Q8R429	39	36.72
Transketolase	P40142	35	44.94
Vimentin	P20152	32	73.18
Hemoglobin subunit alpha	P01942	182	99.3
Phosphoglucomutase-1	Q9D0F9	30	58.72
Aspartate aminotransferase, mitochondrial	P05202	54	80.23
Myosin light chain 1/3, skeletal muscle isoform	P05977	202	93.09
Myosin regulatory light chain 2, skeletal muscle isoform	P97457	157	95.27
Myosin-binding protein C, fast-type	Q5XKE0	24	31.07
Aspartate aminotransferase, cytoplasmic	P05201	37	77.72
Hemoglobin subunit beta-1	P02088	225	100
Myeloperoxidase	P11247	25	40.11
Myosin-1	Q5SX40	121	58.55
Glycogen phosphorylase, muscle form	Q9WUB3	20	43.82
Keratin, type II cytoskeletal 1	P04264	30	40.06
Collagen alpha-1(II) chain	P28481	108	51.98
Apolipoprotein A-I	Q00623	31	66.67
ATP synthase subunit alpha, mitochondrial	Q03265	21	47.74
Prolargin	Q9JK53	43	48.68
Heat shock cognate 71 kDa protein	P63017	25	43.34
Myosin-7	Q91Z83	62	32.04
Glucose-6-phosphate isomerase	P06745	19	44.98
Hemopexin	Q91X72	22	47.39
Alpha-actinin-2	Q9JI91	30	43.51
Malate dehydrogenase, mitochondrial	P08249	48	68.64
Plastin-2	Q61233	19	37.64
Triosephosphate isomerase	P17751	64	79.52
Isoform 4 of LIM domain-binding protein 3	Q9JKS4-4	29	54.5
Parvalbumin alpha	P32848	56	92.73
Decorin	P28654	41	59.89
60 kDa heat shock protein, mitochondrial	P63038	19	46.77
Spectrin alpha chain, non-erythrocytic 1	P16546	17	14.12
Creatine kinase S-type, mitochondrial	Q6P8J7	35	63.96
Very long-chain specific acyl-CoA dehydrogenase, mitochondrial	P50544	20	34.76
Integrin beta-2	P11835	17	31.78
Desmin	P31001	25	46.91
Aconitate hydratase, mitochondrial	Q99KI0	16	35.64
Dihydrolipoyl dehydrogenase, mitochondrial	O08749	24	54.42
Integrin alpha-M	P05555	20	24.02
Collagen alpha-2(VI) chain	Q02788	19	25.05
Voltage-dependent calcium channel subunit alpha-2/delta-1	O08532	18	27.11
Alpha-1-antitrypsin 1-5	Q00898	57	49.64
Phosphoglycerate mutase 2	O70250	56	79.84
ATP synthase subunit beta, mitochondrial	P56480	30	61.25
Chitinase-like protein 3	O35744	20	54.77
Leukotriene A-4 hydrolase	P24527	15	34.37
L-lactate dehydrogenase A chain	P06151	32	48.8
Biglycan	P28653	46	61.25
Myoglobin	P04247	70	88.96
Isoform M1 of Pyruvate kinase PKM	P52480-2	16	44.82
Isoform 2 of Gelsolin	P13020-2	16	21.34
Isocitrate dehydrogenase [NAD] subunit alpha, mitochondrial	Q9D6R2	20	42.35
WD repeat-containing protein 1	O88342	16	40.43
Serine protease inhibitor A3K	P07759	23	31.34
Succinate dehydrogenase [ubiquinone] flavoprotein subunit, mitochondrial	Q8K2B3	14	28.16
Annexin A1	P10107	15	50.87
2-oxoglutarate dehydrogenase, mitochondrial	Q60597	15	21.31
Lumican	P51885	29	38.76
Four and a half LIM domains protein 1	P97447	17	57.5
Lactadherin	P21956	15	40.17
Carbonic anhydrase 3	P16015	22	74.62
Adenylyl cyclase-associated protein 1	P40124	14	36.92
Methanethiol oxidase	P17563	13	39.19
Murinoglobulin-1	P28665	16	15.31
ADP/ATP translocase 1	P48962	17	49.33
Isoform Cytoplasmic of Fumarate hydratase, mitochondrial	P97807-2	14	48.39
Basement membrane-specific heparan sulfate proteoglycan core protein	Q05793	13	6.447
Cytoskeleton-associated protein 4	Q8BMK4	13	37.57
Collagen alpha-1(VI) chain	Q04857	17	18.73
Calcium-binding mitochondrial carrier protein Aralar1	Q8BH59	13	23.19
Apolipoprotein A-IV	P06728	15	58.23
Plectin	Q9QXS1	10	9.273
Peroxiredoxin-1	P35700	20	77.89
Fibronectin	P11276	12	12.84
CD177 antigen	Q8R2S8	11	20.69
Isocitrate dehydrogenase [NADP], mitochondrial	P54071	13	38.94
Tropomyosin alpha-1 chain	P58771	12	47.54
Isoform Cytoplasmic of Glutathione reductase, mitochondrial	P47791-2	13	50
Citrate synthase, mitochondrial	Q9CZU6	14	25.65
Dihydrolipoyllysine-residue succinyltransferase component of 2-oxoglutarate dehydrogenase complex, mitochondrial	Q9D2G2	17	46.7
Peroxiredoxin-6	O08709	13	59.38
Carboxylesterase 1C	P23953	14	33.39
Long-chain specific acyl-CoA dehydrogenase, mitochondrial	P51174	14	36.28
Integrin beta-1	P09055	12	19.92
40S ribosomal protein S19	Q9CZX8	11	60
Hyaluronan and proteoglycan link protein 1	Q9QUP5	13	39.04
Phosphoglycerate kinase 1	P09411	15	45.8
Heat shock protein beta-1	P14602	11	67.94
Peroxiredoxin-2	Q61171	19	77.78
Keratocan	O35367	13	38.75
ATP synthase subunit d, mitochondrial	Q9DCX2	23	83.85
Transgelin-2	Q9WVA4	14	65.33
Isoform Mt-VDAC1 of Voltage-dependent anion-selective channel protein 1	Q60932-2	13	50.18
Sarcalumenin	Q7TQ48	12	33.69
Collagen alpha-1(XI) chain	Q61245	31	19.9
Aggrecan core protein	Q61282	12	8.818
Glyceraldehyde-3-phosphate dehydrogenase	P16858	24	56.16
Alkaline phosphatase, tissue-nonspecific isozyme	P09242	11	34.35
Superoxide dismutase [Mn], mitochondrial	P09671	14	54.5
Long-chain-fatty-acid--CoA ligase 1	P41216	12	29.61
Chondroadherin	O55226	12	53.91
Leukocyte elastase inhibitor A	Q9D154	12	35.62
NADH dehydrogenase [ubiquinone] flavoprotein 1, mitochondrial	Q91YT0	11	23.92
Platelet glycoprotein 4	Q08857	11	32.2
Ferritin light chain 1	P29391	27	71.58
Histone H2A type 1-J	Q99878	30	46.88
Electron transfer flavoprotein subunit beta	Q9DCW4	10	40
Protein NDRG2	Q9QYG0	19	57.95
Tripartite motif-containing protein 72	Q1XH17	10	38.36
Alpha-2-HS-glycoprotein	P29699	36	49.57
Cytochrome b-c1 complex subunit Rieske, mitochondrial	Q9CR68	11	54.01
Myosin light chain 3	P09542	36	74.02
Stress-70 protein, mitochondrial	P38647	9	32.11
Nucleoside diphosphate kinase B	Q01768	17	79.61
Ras-related protein Rab-11B	P46638	10	55.05
Sorting and assembly machinery component 50 homolog	Q8BGH2	10	27.72
Myomesin-1	Q62234	9	11.04
Transcription intermediary factor 1-beta	Q62318	8	22.54
Alpha-enolase	P17182	24	52.53
Vitamin D-binding protein	P21614	8	18.91
Glycerol-3-phosphate dehydrogenase, mitochondrial	Q64521	10	21.05
Cofilin-1	P18760	8	74.1
Fibromodulin	P50608	18	29.26
Adenosylhomocysteinase	P50247	8	28.7
Myozenin-1	Q9JK37	11	50.34
Medium-chain specific acyl-CoA dehydrogenase, mitochondrial	P45952	8	25.89
Reticulon-4	Q99P72	12	10.24
Cadherin-13	Q9WTR5	8	20.31
Dynactin subunit 2	Q99KJ8	9	39.3
Hemoglobin subunit beta	P68871	67	82.31
Fatty acid-binding protein, heart	P11404	17	73.68
Pigment epithelium-derived factor	P97298	8	29.26
H-2 class I histocompatibility antigen, D-B alpha chain	P01899	8	31.77
Tenascin-N	Q80Z71	10	14.1
Adenylate kinase isoenzyme 1	Q9R0Y5	11	51.03
Antithrombin-III	P32261	8	32.9
Alpha-crystallin B chain	P23927	9	66.29
Far upstream element-binding protein 2	Q3U0V1	7	17.51
Isocitrate dehydrogenase [NADP] cytoplasmic	O88844	10	34.54
Transferrin receptor protein 1	Q62351	7	18.35
Actin, cytoplasmic 1	P60712	166	73.6
Cytochrome b-c1 complex subunit 7	Q9D855	8	72.97
Dihydrolipoyllysine-residue acetyltransferase component of pyruvate dehydrogenase complex, mitochondrial	Q8BMF4	9	16.51
Isoform 2 of Reticulon-2	O70622-2	22	46.57
40S ribosomal protein SA	P14206	8	41.69
Phosphate-regulating neutral endopeptidase PHEX	P70669	9	13.75
Elongation factor 1-alpha 1	P68104	12	32.47
Ras-related protein Rab-7a	P51150	8	49.76
Electron transfer flavoprotein subunit alpha, mitochondrial	Q99LC5	8	39.04
40S ribosomal protein S5	P97461	9	42.16
Heat shock protein beta-6	Q5EBG6	8	79.01
Isoform LMW of Kininogen-1	O08677-2	8	22.69
Enoyl-CoA delta isomerase 1, mitochondrial	P42125	10	35.64
Periostin	Q62009	10	20.41
Histone H4	P62806	21	53.4
Superoxide dismutase [Cu-Zn]	P08228	13	83.77
Glutathione peroxidase 1	P11352	8	39.3
Histone H2B type 1-M	Q99879	34	62.7
PDZ and LIM domain protein 3	O70209	7	34.81
Transaldolase	Q93092	7	35.91
PDZ and LIM domain protein 1	O70400	7	29.36
Myotilin	Q9JIF9	7	25.6
MIC	Q8CAQ8	8	26.82
Prothrombin	P19221	8	14.72
Peptidyl-prolyl cis-trans isomerase A	P17742	10	54.27
Annexin A2	P07356	9	33.92
Prohibitin	P67778	7	37.13
2,4-dienoyl-CoA reductase [(3E)-enoyl-CoA-producing], mitochondrial	Q9CQ62	7	39.7
Neutrophilic granule protein	O08692	7	45.51
Tubulin alpha-1C chain	P68373	8	25.39
Glutamine amidotransferase-like class 1 domain-containing protein 3A, mitochondrial	Q9D172	11	42.48
Thioredoxin-dependent peroxide reductase, mitochondrial	P20108	13	38.13
Histone H1.2	P15864	17	37.74
Clusterin	Q06890	8	27.46
Isoform 2 of PDZ and LIM domain protein 7	Q3TJD7-2	8	59.04
Protein S100-A9	P31725	22	53.1
Proteasome activator complex subunit 1	Q06323	8	30.92
Cytochrome c oxidase subunit 4 isoform 1, mitochondrial	P19783	11	55.03
10 kDa heat shock protein, mitochondrial	Q64433	7	73.53
Nucleobindin-1	Q02819	6	25.05
Cytochrome c, somatic	P62898	13	69.52
Guanine deaminase	Q9R111	7	20.48
Complement C3	P01027	7	13.47
3-ketoacyl-CoA thiolase, mitochondrial	Q8BWT1	7	26.7
Ras-related protein Rap-1b	Q99JI6	7	41.85
Troponin T, fast skeletal muscle	Q9QZ47	10	37.13
Cartilage intermediate layer protein 2	D3Z7H8	6	11.02
Four and a half LIM domains protein 3	Q9R059	6	33.56
Isoform 2 of Basigin	P18572-2	7	38.83
Tubulin polymerization-promoting protein family member 3	Q9CRB6	6	57.39
Myosin regulatory light chain 2, ventricular/cardiac muscle isoform	P51667	8	50.6
Mimecan	Q62000	7	27.52
Transthyretin	P07309	7	66.67
Myeloblastin	Q61096	9	28.74
Carbonic anhydrase 2	P00920	6	31.15
Succinate dehydrogenase [ubiquinone] iron-sulfur subunit, mitochondrial	Q9CQA3	10	34.4
Peroxiredoxin-5, mitochondrial	P99029	9	47.14
Alpha-1-antitrypsin 1-1	P07758	60	47.94
4-trimethylaminobutyraldehyde dehydrogenase	Q9JLJ2	6	19.64
Neutrophil gelatinase-associated lipocalin	P11672	13	36.5
Catalase	P24270	7	28.08
Serpin H1	P19324	6	21.1
Laminin subunit beta-2	Q61292	7	8.894
40S ribosomal protein S18	P62270	6	55.26
Haptoglobin	Q61646	8	26.22
Ras-related C3 botulinum toxin substrate 1	P63001	6	36.46
NADH dehydrogenase [ubiquinone] 1 alpha subcomplex subunit 8	Q9DCJ5	9	52.33
Cartilage oligomeric matrix protein	Q9R0G6	6	14.7
Cytochrome c oxidase subunit 6B1	P56391	7	70.93
EF-hand domain-containing protein D2	A5D7A0	7	27.27
Ribosome-binding protein 1	Q99PL5	8	10.4
Ras GTPase-activating-like protein IQGAP1	Q9JKF1	6	4.707
NADH-ubiquinone oxidoreductase 75 kDa subunit, mitochondrial	Q91VD9	8	18.71
ATP synthase subunit O, mitochondrial	Q9DB20	10	55.4
Synaptopodin-2	Q91YE8	7	10.3
Cytochrome b-c1 complex subunit 1, mitochondrial	Q9CZ13	5	26.25
Poly(rC)-binding protein 1	P60335	6	20.22
Integrin alpha-7	Q61738	5	10.86
Apolipoprotein E	P08226	6	29.58
Cytochrome b-c1 complex subunit 2, mitochondrial	Q9DB77	6	27.15
Eosinophil peroxidase	P49290	10	16.2
Galectin-1	P16045	8	48.15
GTP-binding nuclear protein Ran	P62827	6	41.67
Carbonic anhydrase 1	P13634	6	42.91
Phosphatidylethanolamine-binding protein 1	P70296	10	62.57
Heterogeneous nuclear ribonucleoprotein A/B	Q99020	6	23.86
Inositol monophosphatase 1	O55023	6	28.52
Far upstream element-binding protein 1	Q91WJ8	6	14.75
Lactoylglutathione lyase	Q9CPU0	5	35.33
Galectin-3	P16110	5	23.86
Dihydropyrimidinase-related protein 2	O08553	5	15.38
Polyubiquitin-C	P0CG50	17	82.97
Persulfide dioxygenase ETHE1, mitochondrial	Q9DCM0	5	32.28
F-actin-capping protein subunit beta	P47757	7	27.08
Elongation factor 2	P58252	5	12.7
Aminopeptidase N	P97449	6	13.98
NADH dehydrogenase [ubiquinone] iron-sulfur protein 3, mitochondrial	Q9DCT2	5	27.76
Annexin A7	Q07076	6	17.06
14-3-3 protein zeta/delta	P63102	7	39.18
Histone H1.5	P43276	7	29.6
Cytosol aminopeptidase	Q9CPY7	5	20.42
Glycerol-3-phosphate dehydrogenase [NAD(+)], cytoplasmic	P13707	6	35.24
Nidogen-1	P10493	6	9.639
Endophilin-B1	Q9JK48	5	23.01
Collagen alpha-2(XI) chain	Q64739	19	15.78
Isoform 2 of PDZ and LIM domain protein 5	Q8CI51-2	6	28.49
Synaptic vesicle membrane protein VAT-1 homolog	Q62465	9	30.79
Serine hydroxymethyltransferase, mitochondrial	Q9CZN7	5	13.29
Cytochrome c oxidase subunit 5A, mitochondrial	P12787	9	48.63
BAG family molecular chaperone regulator 3	Q9JLV1	7	17.85
Cathelicidin antimicrobial peptide	P51437	12	57.56
Leucine-rich repeat-containing protein 59	Q922Q8	6	26.38
Malate dehydrogenase, cytoplasmic	P14152	6	22.16
ATP synthase subunit gamma, mitochondrial	Q91VR2	6	21.14
Acid ceramidase	Q9WV54	5	17.01
Myosin-8	P13542	96	45.33
Hypoxanthine-guanine phosphoribosyltransferase (Fragment)	Q64531	5	44.86
Ankyrin repeat domain-containing protein 2	Q9WV06	6	23.48
Ras-related protein Rab-14	Q91V41	6	37.67
Laminin subunit gamma-1	P02468	5	6.223
40S ribosomal protein S25	P62852	6	29.6
Aldehyde dehydrogenase, mitochondrial	P47738	6	13.68
Profilin-1	P62962	6	44.29
Parkinson disease protein 7 homolog	Q99LX0	6	24.87
Matrix metalloproteinase-9	P41245	5	10.27
Inositol-3-phosphate synthase 1	Q9JHU9	6	14.9
40S ribosomal protein S3	P62908	5	33.74
40S ribosomal protein S10	P63325	4	50.3
Cytochrome c oxidase subunit NDUFA4	Q62425	5	57.32
Glutathione S-transferase Mu 1	P10649	5	37.16
Mitochondrial 2-oxoglutarate/malate carrier protein	Q9CR62	5	18.79
Tenascin	Q80YX1	6	6.209
Sorcin	Q6P069	6	31.31
Porphobilinogen deaminase	P22907	6	26.04
Beta-hexosaminidase subunit beta	P20060	6	13.62
Caveolin-1	P49817	5	56.18
Receptor of activated protein C kinase 1	P68040	5	22.71
Major urinary protein 11	P04938	5	43.65
Collagen alpha-1(XV) chain	O35206	5	5.486
Lysosome-associated membrane glycoprotein 2	P17047	5	10.6
FUN14 domain-containing protein 2	Q9D6K8	5	37.09
Vesicle-associated membrane protein-associated protein B	Q9QY76	4	29.63
Acetyl-CoA acetyltransferase, mitochondrial	Q8QZT1	5	19.1
Ubiquinone biosynthesis protein COQ9, mitochondrial	Q8K1Z0	6	14.7
NADH dehydrogenase [ubiquinone] 1 beta subcomplex subunit 10	Q9DCS9	5	57.39
MIC	Q9DCZ4	5	39.39
Integrin beta-3	O54890	5	10.42
SPARC	P07214	5	23.51
Beta-2-glycoprotein 1	Q01339	5	21.45
Glutathione S-transferase omega-1	O09131	4	30
Fatty acid-binding protein, adipocyte	P04117	6	43.18
Ribonuclease inhibitor	Q91VI7	5	18.2
Cathepsin D	P18242	5	19.27
Ferritin heavy chain	P09528	7	46.7
RNA transcription, translation and transport factor protein	Q9CQE8	4	31.56
Prohibitin-2	O35129	5	33.44
Zyxin	Q62523	4	15.25
Cell division control protein 42 homolog	Q90694	5	39.27
ATP-dependent 6-phosphofructokinase, muscle type	P47857	5	7.692
Ubiquitin-conjugating enzyme E2 N	P61089	4	36.84
Delta(3,5)-Delta(2,4)-dienoyl-CoA isomerase, mitochondrial	O35459	6	20.8
ATP synthase F(0) complex subunit B1, mitochondrial	Q9CQQ7	4	33.59
Trifunctional enzyme subunit beta, mitochondrial	Q99JY0	4	10.11
Sushi domain-containing protein 2	Q9DBX3	4	8.415
D-dopachrome decarboxylase	O35215	5	57.63
Dihydropyrimidinase-related protein 3	Q62188	5	11.23
Asporin	Q99MQ4	4	24.93
Ras-related protein Rab-5C	P35278	4	29.17
NADH dehydrogenase [ubiquinone] flavoprotein 2, mitochondrial	Q9D6J6	5	33.06
Glycerol-3-phosphate phosphatase	Q8CHP8	4	21.5
Collagen alpha-2(V) chain	Q3U962	45	34.67
Heterogeneous nuclear ribonucleoprotein M	Q9D0E1	4	11.93
6-phosphogluconolactonase	Q9CQ60	4	31.91
Heterogeneous nuclear ribonucleoprotein K	P61979	4	29.81
Calponin-2	Q08093	4	20.66
Keratin, type I cytoskeletal 10	P02535	8	24.91
Voltage-dependent anion-selective channel protein 2	Q60930	5	20
U1 small nuclear ribonucleoprotein A	Q62189	4	20.91
Bisphosphoglycerate mutase	P15327	5	24.71
Ectonucleotide pyrophosphatase/phosphodiesterase family member 1	P06802	4	8.499
Ras-related protein Rab-1A	P62821	5	28.29
Stress-induced-phosphoprotein 1	Q60864	4	17.68
NADH dehydrogenase [ubiquinone] 1 alpha subcomplex subunit 2	Q9CQ75	4	43.43
Arylsulfatase B	P50429	4	12.55
Transgelin	P37804	4	34.33
NADH dehydrogenase [ubiquinone] iron-sulfur protein 2, mitochondrial	Q91WD5	4	9.935
Sorbitol dehydrogenase	Q64442	4	16.81
Myelin protein P0	P27573	4	18.55
Pyruvate dehydrogenase E1 component subunit alpha, somatic form, mitochondrial	P35486	5	15.64
Cytochrome c oxidase subunit 6C	Q9CPQ1	6	71.05
Hydroxyacyl-coenzyme A dehydrogenase, mitochondrial	Q61425	4	18.47
Calpain small subunit 1	O88456	4	25.65
Enoyl-CoA hydratase, mitochondrial	Q8BH95	5	28.62
Ceruloplasmin	Q61147	4	8.86
Myosin light polypeptide 6	Q60605	13	40.4
Trifunctional enzyme subunit alpha, mitochondrial	Q8BMS1	4	10.22
CYFIP-related Rac1 interactor B	Q921M7	5	28.4
Sterol carrier protein 2	P32020	4	10.05
Protein NipSnap homolog 2	O55126	4	27.4
Protein S100-A11	P50543	5	46.94
Neutrophil collagenase	O70138	3	14.62
Transitional endoplasmic reticulum ATPase	Q01853	4	7.94
Phosphate carrier protein, mitochondrial	Q8VEM8	6	19.33
40S ribosomal protein S3a	P97351	4	29.55
Microtubule-associated protein 4	P27546	5	14.76
Tropomyosin beta chain	P58774	9	38.38
Ubiquitin-conjugating enzyme E2 L3	P68037	4	41.56
Perilipin-4	O88492	6	24.45
Histone H1.1	P43275	10	40.85
Dystroglycan	Q62165	5	6.943
Synaptophysin-like protein 1	O09117	4	11.11
Isoform 2 of Myc box-dependent-interacting protein 1	O08539-2	5	23.04
Bcl-2 homologous antagonist/killer	O08734	4	22.01
60S ribosomal protein L7	P14148	4	28.89
Thrombospondin-1	P35441	3	6.923
NADH dehydrogenase [ubiquinone] 1 alpha subcomplex subunit 6	Q9CQZ5	5	33.59
UV excision repair protein RAD23 homolog B	P54728	4	10.34
Eosinophil cationic protein 1	P97426	4	27.74
Actin-related protein 2/3 complex subunit 4	P59999	4	22.62
Isoleucine--tRNA ligase, mitochondrial	Q8BIJ6	4	4.447
Isoform 2 of Tumor protein D52	Q62393-2	4	31.35
Alpha-1-antitrypsin 1-4	Q00897	41	49.15
Annexin A6	P14824	3	10.55
NADH dehydrogenase [ubiquinone] 1 subunit C2	Q9CQ54	4	33.33
Cation-dependent mannose-6-phosphate receptor	P24668	3	14.03
Acyl-CoA-binding protein	P31786	8	75.86
Delta-aminolevulinic acid dehydratase	P06214	3	14.85
Dipeptidase 1	P31428	4	14.15
Troponin C, skeletal muscle	P20801	8	47.5
LIM and SH3 domain protein 1	Q61792	3	26.62
60S acidic ribosomal protein P0	P14869	3	13.25
Cell surface glycoprotein MUC18	Q8R2Y2	3	9.414
Ribose-5-phosphate isomerase	P47968	3	17.82
Coagulation factor X	O88947	3	12.68
MLV-related proviral Env polyprotein	P10404	3	9.672
Prelamin-A/C	P48678	4	14.74
Electron transfer flavoprotein-ubiquinone oxidoreductase, mitochondrial	Q921G7	4	8.766
ATP synthase protein 8	P03930	4	46.27
Sodium/potassium-transporting ATPase subunit beta-3	P97370	3	21.58
Calmodulin-3	P0DP28	4	35.57
Aldehyde dehydrogenase family 3 member B1	Q80VQ0	3	11.97
Hemoglobin subunit alpha	B3EWD3	64	79.43
Hemoglobin subunit beta	P11758	108	55.48
NADH dehydrogenase [ubiquinone] 1 beta subcomplex subunit 9	Q9CQJ8	3	27.93
Tripeptidyl-peptidase 1	O89023	4	11.92
Tumor protein D54	Q9CYZ2	5	30
Phosphoglycerate mutase 1	Q9DBJ1	24	42.52
40S ribosomal protein S2	P25444	3	12.97
Histone H2A.V	Q3THW5	11	31.25
NADH dehydrogenase [ubiquinone] 1 beta subcomplex subunit 8, mitochondrial	Q9D6J5	4	39.25
GTP-binding protein SAR1b	Q9CQC9	3	15.15
ATP synthase membrane subunit K, mitochondrial	Q78IK2	3	44.83
Heterogeneous nuclear ribonucleoprotein H	O35737	3	9.577
5'-3' exonuclease PLD3	O35405	3	6.352
CD44 antigen	P15379	4	6.555
Adiponectin	Q60994	3	18.62
Tubulin beta-4B chain	P68372	5	26.97
40S ribosomal protein S13	P62301	4	29.14
Protein CREG1	O88668	3	21.36
Tetranectin	P43025	4	24.26
Heme oxygenase 1	P14901	3	27.34
RNA-binding protein FUS	P56959	3	6.371
Cysteine and glycine-rich protein 1	P97315	3	33.16
ADP-ribosylation factor-like protein 8B	Q9CQW2	3	34.95
ATP synthase subunit delta, mitochondrial	Q9D3D9	6	37.5
Heterogeneous nuclear ribonucleoprotein D0	Q60668	5	17.46
Membrane primary amine oxidase	O70423	5	12.68
COP9 signalosome complex subunit 8	Q8VBV7	3	30.14
Vesicular integral-membrane protein VIP36	Q9DBH5	4	21.51
60S ribosomal protein L14	Q9CR57	3	17.05
Cathepsin B	P10605	4	25.07
Choline transporter-like protein 2	Q8BY89	3	7.224
ADP-ribosylation factor 3	P61205	3	26.52
Transforming growth factor-beta-induced protein ig-h3	P82198	4	12.3
Collagen alpha-1(III) chain	P08121	48	27.73
Integrin beta-2-like protein	Q3UV74	3	9.079
Prosaposin	Q61207	3	10.77
NADH dehydrogenase [ubiquinone] 1 alpha subcomplex subunit 13	Q9ERS2	3	29.17
Adenylosuccinate lyase	P54822	3	7.645
Transforming protein RhoA	Q9QUI0	3	20.73
Complement factor H	P06909	3	3.728
Actin-related protein 2/3 complex subunit 3	Q9JM76	4	26.97
F-actin-capping protein subunit alpha-2	P47754	3	28.67
Myozenin-2	Q9JJW5	4	14.39
Macrophage migration inhibitory factor	P34884	4	29.57
Protein phosphatase 1 regulatory subunit 3A	Q99MR9	4	6.336
Voltage-dependent anion-selective channel protein 3	Q60931	7	26.15
Translationally-controlled tumor protein	P63028	10	74.42
Proteasome activator complex subunit 2	P97372	3	25.1
Vitronectin	P29788	3	13.81
Acylamino-acid-releasing enzyme	Q8R146	3	7.24
NADH dehydrogenase [ubiquinone] iron-sulfur protein 8, mitochondrial	Q8K3J1	4	32.55
Troponin I, fast skeletal muscle	P13412	5	25.82
ATP synthase-coupling factor 6, mitochondrial	P97450	3	43.52
Neutrophil elastase	Q3UP87	3	15.47
40S ribosomal protein S12	P63323	5	43.94
NADH dehydrogenase [ubiquinone] 1 alpha subcomplex subunit 5	Q9CPP6	3	50
Tenascin-X	P22105	7	3.676
Adhesion G protein-coupled receptor E5	Q9Z0M6	3	4.156
Protein S100-A8	P27005	11	65.17
Protein S100-A10	P08207	4	34.02
Histone H1.4	P43274	15	31.96
ATP synthase subunit e, mitochondrial	Q06185	4	69.01
Receptor expression-enhancing protein 5	Q60870	3	14.59
Cytochrome c oxidase subunit 2	Q38S50	3	10.57
Translin	Q62348	3	21.05
Nicastrin	P57716	3	5.65
Alpha-1-antitrypsin 1-2	P22599	54	46
Epidermal growth factor receptor	Q01279	3	2.397
39S ribosomal protein L12, mitochondrial	Q9DB15	3	20.4
Serine/threonine-protein phosphatase 2A catalytic subunit alpha isoform	P63330	4	18.45
NADH dehydrogenase [ubiquinone] 1 alpha subcomplex subunit 7	Q9Z1P6	2	33.63
Nucleoside diphosphate kinase A	P15532	12	55.26
Peptidyl-prolyl cis-trans isomerase B	P24369	3	16.2
Sodium/potassium-transporting ATPase subunit beta-1	P14094	5	34.21
Pre-mRNA-processing factor 19	Q9JMJ4	3	9.722
Synaptopodin	Q8CC35	3	6.459
60S ribosomal protein L18	P35980	3	20.74
Alpha-sarcoglycan	P82350	3	11.11
Alpha-actinin-4	P57780	13	17.21
Actin-related protein 2/3 complex subunit 2	Q9CVB6	3	11.67
Adipocyte plasma membrane-associated protein	Q9D7N9	4	13.98
Mitochondrial fission 1 protein	Q9CQ92	3	36.18
Eukaryotic translation initiation factor 5A-1	P63242	3	20.13
26S proteasome non-ATPase regulatory subunit 9	Q9CR00	3	25.23
Aspartyl aminopeptidase	Q9Z2W0	3	10.99
NADH dehydrogenase [ubiquinone] iron-sulfur protein 4, mitochondrial	Q9CXZ1	3	22.86
Hydroxyacylglutathione hydrolase, mitochondrial	Q99KB8	3	13.59
UTP--glucose-1-phosphate uridylyltransferase	Q91ZJ5	4	13.98
Perilipin-3	Q9DBG5	4	23.11
40S ribosomal protein S4, X isoform	P62702	2	34.98
Neuroplastin	P97300	4	9.32
Bone marrow proteoglycan	Q61878	3	16.59
NADH dehydrogenase [ubiquinone] iron-sulfur protein 6, mitochondrial	P52503	4	50.86
Vesicle-associated membrane protein-associated protein A	Q9WV55	4	20.48
Integrin alpha-IIb	Q9QUM0	3	3.775
Mammalian ependymin-related protein 1	Q99M71	3	14.29
SH3 domain-binding glutamic acid-rich-like protein 3	Q91VW3	3	49.46
Ubiquilin-1	Q8R317	2	9.622
Elongation factor 1-gamma	Q9D8N0	2	20.14
Mitochondrial antiviral-signaling protein	Q8VCF0	2	14.51
Phospholipase B-like 1	Q8VCI0	2	8.727
Beta-hexosaminidase subunit alpha	P29416	2	10.61
Large proline-rich protein BAG6	Q9Z1R2	2	5.026
Myocilin	O70624	3	15.31
Calpastatin	P51125	3	11.04
Isoform 3 of Reticulon-3	Q9ES97-3	2	17.72
Macrophage-capping protein	P24452	3	18.18
Transmembrane protein 109	Q3UBX0	5	15.64
Lysosome membrane protein 2	O35114	3	13.6
ATP synthase subunit epsilon, mitochondrial	P56382	3	44.23
Cysteine-rich protein 1	P63254	2	35.06
Cathepsin G	P28293	2	13.03
Calcium-binding protein 39	Q06138	3	10.26
Beta-galactosidase	P23780	2	7.264
Lysozyme C-2	P08905	3	23.65
Succinate--CoA ligase [ADP/GDP-forming] subunit alpha, mitochondrial	Q9WUM5	2	10.69
Hemoglobin subunit alpha-1/2	P01948	22	65.49
Proline-rich protein 33	Q8C494	2	17.69
Glutathione S-transferase P 1	P19157	4	18.1
Cysteine and glycine-rich protein 3	P50462	3	23.71
Thioredoxin	P10639	2	31.43
Ribonuclease T2-B	C0HKG6	2	16.22
Endoplasmic reticulum metallopeptidase 1	Q3UVK0	2	3.341
40S ribosomal protein S17	P63276	2	13.33
Oxygen-dependent coproporphyrinogen-III oxidase, mitochondrial	P36552	2	9.255
Cystatin-B	Q62426	2	41.84
NADH dehydrogenase [ubiquinone] iron-sulfur protein 7, mitochondrial	Q9DC70	2	11.16
Hemoglobin subunit alpha	P11757	18	61.7
Retinal dehydrogenase 1	P24549	3	5.788
Cytochrome c1, heme protein, mitochondrial	Q9D0M3	2	9.538
Fibrinogen gamma chain	Q8VCM7	2	7.339
SUMO-conjugating enzyme UBC9	P63280	2	14.56
Choline transporter-like protein 1	Q6X893	2	3.828
Delta-sarcoglycan	P82347	2	7.266
40S ribosomal protein S28	P62858	2	33.33
60S ribosomal protein L27	P61358	2	12.5
Macrosialin	P31996	2	5.521
Ig gamma-1 chain C region, membrane-bound form	P01869	2	5.598
MICOS complex subunit Mic19	Q9CRB9	3	19.38
Glycolipid transfer protein	Q9JL62	2	20.57
Acylpyruvase FAHD1, mitochondrial	Q8R0F8	2	18.94
Caspase-3	P70677	2	6.859
C-type lectin domain family 3 member A	Q9EPW4	4	19.39
Histone-lysine N-methyltransferase Smyd1	P97443	2	6.939
40S ribosomal protein S29	P62274	2	33.93
Apolipoprotein C-I	P34928	2	20.45
Lysosomal alpha-mannosidase	O09159	3	7.108
Myristoylated alanine-rich C-kinase substrate	P26645	2	13.27
Glutathione peroxidase 3	P46412	2	16.37
Histone H1.0	P10922	3	13.92
Alpha-1-acid glycoprotein 1	Q60590	2	14.98
Ras suppressor protein 1	Q15404	3	14.08
60S ribosomal protein L7a	P12970	3	27.82
Isoaspartyl peptidase/L-asparaginase	Q8C0M9	3	15.34
Gamma-sarcoglycan	P82348	2	17.18
Integrin alpha-V	P43406	2	5.747
Neural cell adhesion molecule 1	P13595	2	4.126
Sodium/potassium-transporting ATPase subunit alpha-2	Q6PIE5	3	10.1
Succinate--CoA ligase [ADP-forming] subunit beta, mitochondrial	Q9Z2I9	3	17.28
Filamin-B	Q80X90	9	4.689
Serine/threonine-protein phosphatase 6 catalytic subunit	Q9CQR6	2	17.38
Purine nucleoside phosphorylase	P23492	3	11.42
Histone H3.2	Q71DI3	3	44.85
6-phosphogluconate dehydrogenase, decarboxylating	Q9DCD0	2	4.141
Flavin reductase (NADPH)	Q923D2	2	9.223
5'-nucleotidase	Q61503	3	6.597
Sarcospan	Q62147	2	8.796
Versican core protein	Q62059	2	1.906
D-3-phosphoglycerate dehydrogenase	Q61753	3	6.942
Fibrinogen beta chain	Q8K0E8	2	8.108
Leukosialin	P15702	3	15.44
NPC intracellular cholesterol transporter 2	Q9Z0J0	2	18.12
Transmembrane emp24 domain-containing protein 9	Q99KF1	3	25.11
Myozenin-3	Q8R4E4	2	25.31
Caveolae-associated protein 1	O54724	2	19.39
Neutrophil cytosol factor 2	O70145	2	8.952
Cartilage intermediate layer protein 1	Q66K08	2	5.49
Tubulin alpha-4A chain	P68368	7	23.21
Serpin B6	Q60854	4	16.14
Leukocyte surface antigen CD47	Q61735	2	16.17
28S ribosomal protein S36, mitochondrial	Q9CQX8	3	56.86
Probable ATP-dependent RNA helicase DDX5	Q61656	2	3.257
Coronin-1A	O89053	2	8.243
von Willebrand factor A domain-containing protein 5A	Q99KC8	2	4.918
Troponin I, slow skeletal muscle	Q9WUZ5	2	15.51
Actin-related protein 2/3 complex subunit 5	Q9CPW4	2	16.56
Phosphoglucomutase-like protein 5	Q8BZF8	3	12.35
Histone H2A type 1-C	Q93077	31	46.15
Xaa-Pro dipeptidase	Q11136	2	8.519
V-type proton ATPase subunit E 1	P50518	2	24.34
NADH dehydrogenase [ubiquinone] 1 beta subcomplex subunit 5, mitochondrial	Q9CQH3	2	14.81
Peroxisomal acyl-coenzyme A oxidase 1	Q9R0H0	2	12.1
NADH dehydrogenase [ubiquinone] 1 beta subcomplex subunit 3	Q9CQZ6	2	35.58
Ig kappa chain V-II region 26-10	P01631	2	17.7
Platelet factor 4	Q9Z126	2	34.29
Cysteine-rich protein 2	Q9DCT8	2	21.63
Dermokine	Q6P253	2	5.416
Apoptosis-inducing factor 1, mitochondrial	Q9Z0X1	2	8.66
PRA1 family protein 3	Q8R5J9	2	23.4
L-lactate dehydrogenase B chain	P16125	4	16.17
	O54901	3	11.15
MIC	Q78IK4	2	26.04
Phosphatidylinositol-binding clathrin assembly protein	Q7M6Y3	2	6.061
B-cell receptor-associated protein 31	Q61335	2	20
NADH dehydrogenase [ubiquinone] 1 alpha subcomplex subunit 12	Q7TMF3	2	32.41
Alpha-synuclein	O55042	2	40
Ecto-ADP-ribosyltransferase 3	Q8R2G4	2	7.817
Carboxypeptidase Q	Q9WVJ3	2	7.234
Keratin, type II cytoskeletal 2 epidermal	Q3TTY5	3	8.911
Thioredoxin domain-containing protein 5	Q91W90	2	12.95
RNA binding motif protein, X-linked-like-1	Q91VM5	2	12.37
40S ribosomal protein S16	P14131	2	30.14
Thrombospondin-4	Q9Z1T2	3	6.231
Fibrinogen alpha chain	E9PV24	2	5.196
High mobility group protein B2	P30681	2	17.62
Ubiquitin-fold modifier-conjugating enzyme 1	Q9CR09	2	11.38
ATP synthase subunit f, mitochondrial	P56135	2	23.86
CDGSH iron-sulfur domain-containing protein 1	Q91WS0	3	31.48
Annexin A11	P97384	3	16.5
NADH dehydrogenase [ubiquinone] 1 beta subcomplex subunit 6	Q3UIU2	2	24.22
Cytochrome b-c1 complex subunit 8	Q9CQ69	2	36.59
Pyruvate dehydrogenase protein X component, mitochondrial	Q8BKZ9	2	8.383
Polypyrimidine tract-binding protein 1	P17225	3	13.28
Lysosomal acid phosphatase	P24638	2	6.383
Mitochondrial import inner membrane translocase subunit Tim13	P62075	2	26.32
Ras-related C3 botulinum toxin substrate 2	Q05144	6	40.63
Guanine nucleotide-binding protein G(I)/G(S)/G(T) subunit beta-1	P62874	2	10.29
Grancalcin	Q8VC88	2	8.182
Vesicle-trafficking protein SEC22b	O08547	2	8.837
60S ribosomal protein L29	P47915	2	18.75
Keratin, type I cytoskeletal 15	Q61414	3	11.73
Glycogenin-1	Q9R062	2	8.108
Apolipoprotein A-II	P09813	6	48.04
Lysosome-associated membrane glycoprotein 1	P11438	4	8.867
60S ribosomal protein L13	P47963	2	26.07
Isocitrate dehydrogenase [NAD] subunit gamma, mitochondrial	P51553	2	8.906
NADH dehydrogenase [ubiquinone] 1 beta subcomplex subunit 7	Q9CR61	2	23.36
Heterogeneous nuclear ribonucleoproteins A2/B1	O88569	1	17
Platelet-activating factor acetylhydrolase IB subunit alpha2	Q61206	2	12.23
Hemoglobin subunit alpha	B3EWD5	85	90.07
Protein S100-A4	P07091	2	15.84
Heme-binding protein 1	Q9R257	2	26.84
Inorganic pyrophosphatase	Q9D819	2	7.958
Fetuin-B	Q9QXC1	2	4.897
Serum paraoxonase/lactonase 3	Q62087	2	8.757
Branched-chain-amino-acid aminotransferase, mitochondrial	O35855	2	7.888
Small glutamine-rich tetratricopeptide repeat-containing protein alpha	Q8BJU0	2	7.302
14-3-3 protein gamma	P61982	3	17
Selenide, water dikinase 1	Q8BH69	2	6.378
60S ribosomal protein L21	O09167	2	14.37
Endoplasmic reticulum chaperone BiP	P20029	2	13.74
Integrin alpha-5	P11688	1	3.989
Ribosyldihydronicotinamide dehydrogenase [quinone]	Q9JI75	1	12.99
Extracellular superoxide dismutase [Cu-Zn]	O09164	1	18.33
Y-box-binding protein 2	Q9Z2C8	2	11.11
CDGSH iron-sulfur domain-containing protein 2	Q9CQB5	2	26.67
Vesicle-associated membrane protein 2	P63044	1	20.69
Vacuolar protein sorting-associated protein 29	Q9QZ88	2	28.57
Cytochrome b5 type B	Q9CQX2	2	50
Ras-related protein Rab-6B	P61294	2	17.79
GPI-linked NAD(P)(+)--arginine ADP-ribosyltransferase 1	Q60935	1	8.308
Sialoadhesin	Q62230	2	4.248
Syntaxin-12	Q9ER00	2	25.18
Inhibitor of carbonic anhydrase	Q9DBD0	2	4
Serine/threonine-protein phosphatase 2B catalytic subunit alpha isoform	P63328	1	5.374
NADH dehydrogenase [ubiquinone] flavoprotein 3, mitochondrial	Q8BK30	1	36.54
Kynurenine--oxoglutarate transaminase 1	Q8BTY1	1	4.953
Cathepsin E	P70269	1	7.557
Calcium/calmodulin-dependent protein kinase type II subunit alpha	P11798	1	6.695
Methylcrotonoyl-CoA carboxylase beta chain, mitochondrial	Q3ULD5	1	5.506
4F2 cell-surface antigen heavy chain	P10852	1	9.506
Alpha-hemoglobin-stabilizing protein	Q9CY02	2	44.12
40S ribosomal protein S20	P60867	1	21.85
60S ribosomal protein L12	P35979	1	14.55
Ectonucleoside triphosphate diphosphohydrolase 1	P55772	1	8.627
Cytochrome c oxidase subunit 5B, mitochondrial	P19536	2	30.47
Cytochrome b5	P56395	1	27.61
Ragulator complex protein LAMTOR1	Q9CQ22	1	15.53
Protein S100-A6	P14069	1	16.85
Leucine-rich repeat-containing protein 20	Q8CI70	2	26.63
Clathrin light chain B	Q6IRU5	1	14.85
Proteasome subunit alpha type-5	Q9Z2U1	1	9.129
N-acetylneuraminate lyase	Q9DCJ9	1	6.875
Peptidoglycan recognition protein 1	O88593	1	11.54
Ras-related protein Rab-3D	P35276	3	16.89
Alcohol dehydrogenase class-3	P28474	2	12.3
Muscleblind-like protein 1	Q9JKP5	2	10.26
Glycerophosphoinositol inositolphosphodiesterase GDPD2	Q9ESM6	1	3.896
Junctional sarcoplasmic reticulum protein 1	Q3MI48	1	19.58
Collectin-12	Q8K4Q8	2	8.356
Carboxymethylenebutenolidase homolog	Q8R1G2	1	12.24
Actin, aortic smooth muscle	P62737	229	73.47
Protein FAM162A	Q9D6U8	2	25.81
Nesprin-1	Q6ZWR6	3	0.966
Aquaporin-1	Q02013	1	9.665
Acyl-protein thioesterase 1	P97823	1	11.3
NADH dehydrogenase [ubiquinone] 1 alpha subcomplex subunit 11	Q9D8B4	1	19.15
Rho GDP-dissociation inhibitor 1	Q99PT1	1	17.65
Carnitine O-acetyltransferase	P47934	1	2.716
NADH dehydrogenase [ubiquinone] 1 beta subcomplex subunit 4	Q9CQC7	1	18.6
Hemoglobin subunit beta	B3EWD4	36	65.07
Ubiquitin-conjugating enzyme E2 K	P61087	2	17.5
Laminin subunit alpha-2	Q60675	1	2.117
Adenylosuccinate synthetase isozyme 1	P28650	1	5.908
Putative phospholipase B-like 2	Q3TCN2	1	3.367
Ubiquilin-2	Q9QZM0	2	11.44
60S ribosomal protein L8	P62918	1	12.84
Protein NipSnap homolog 3B	Q9CQE1	1	6.073
Isoform 6 of LIM domain-binding protein 3	Q9JKS4-6	21	88.54
Isoform 2 of Low molecular weight phosphotyrosine protein phosphatase	Q9D358-2	1	13.92
Heat shock protein beta-7	P35385	2	24.26
Histidine-rich glycoprotein	Q9ESB3	1	3.048
Suprabasin	Q8CIT9	1	5
ADP/ATP translocase 2	P51881	9	35.23
40S ribosomal protein S5-1	Q9ZUT9	2	19.32
Adenosine deaminase	P03958	1	5.682
Kinesin-like protein KIN-14G	O81635	1	1.722
H-2 class I histocompatibility antigen, K-B alpha chain	P01901	4	18.97
Keratin, type II cytoskeletal 79	Q8VED5	2	10.55
Protein ERGIC-53	Q9D0F3	2	7.35
Elongin-B	P62869	2	27.97
Chondroitin sulfate proteoglycan 4	Q8VHY0	1	1.547
Neutral alpha-glucosidase AB	Q8BHN3	1	4.131
Actin-related protein 2/3 complex subunit 5-like protein	Q9D898	1	16.99
Programmed cell death protein 6	P12815	1	15.71
Insulin-degrading enzyme	Q9JHR7	1	1.472
S-methyl-5'-thioadenosine phosphorylase	Q9CQ65	1	9.894
Programmed cell death protein 10	Q8VE70	1	10.85
Peflin	Q8BFY6	1	6.182
Cytochrome c oxidase subunit 6A2, mitochondrial	P43023	1	42.27
Ectonucleoside triphosphate diphosphohydrolase 2	O55026	1	3.434
Keratin, type II cytoskeletal 5	Q922U2	4	9.483
Major urinary protein 2	P11589	4	41.11
Ras-related protein Rab-5B	P61021	3	20
Poly(rC)-binding protein 2	Q61990	3	8.84
Fructose-bisphosphate aldolase 5, cytosolic	O65581	6	6.145
Peroxisome biogenesis protein 2	Q9CA86	1	6.907
Synaptophysin-like protein 2	O89104	2	5.682
Calcium-binding mitochondrial carrier protein SCaMC-1	Q8BMD8	1	4.632
AMP deaminase 1	Q3V1D3	1	2.282
Angiotensin-converting enzyme	P09470	1	1.524
Aldehyde oxidase 3	G3X982	1	1.648
Heterogeneous nuclear ribonucleoproteins C1/C2	Q9Z204	1	6.39
NADH dehydrogenase [ubiquinone] 1 alpha subcomplex subunit 9, mitochondrial	Q9DC69	1	5.836
ATP synthase subunit g, mitochondrial	Q9CPQ8	1	23.3
Ras-related protein Rab-31	Q921E2	1	8.247
60S ribosomal protein L24	Q8BP67	1	9.554
Haloacid dehalogenase-like hydrolase domain-containing protein 2	Q3UGR5	1	5.405
Guanine nucleotide-binding protein subunit alpha-12	Q03113	1	4.724
Cytochrome c oxidase subunit 7A2, mitochondrial	P48771	1	21.69
Embigin	P21995	1	3.939
Osteopontin	P10923	1	9.184
Fibulin-5	Q9WVH9	1	2.009
Destrin	Q9R0P5	1	6.667
Glutaredoxin-1	Q9QUH0	1	10.28
CCR4-NOT transcription complex subunit 9	Q9JKY0	1	4.013
60S ribosomal protein L38	Q9JJI8	1	18.57
Equilibrative nucleoside transporter 1	Q9JIM1	1	2.609
Methylmalonate-semialdehyde dehydrogenase [acylating], mitochondrial	Q9EQ20	1	2.056
Pyrroline-5-carboxylate reductase 3	Q9DCC4	1	4.015
Small muscular protein	Q9DC77	1	18.82
OCIA domain-containing protein 2	Q9D8W7	1	8.442
60S ribosomal protein L4	Q9D8E6	1	2.864
Coiled-coil-helix-coiled-coil-helix domain-containing protein 2	Q9D1L0	1	6.536
Protein disulfide-isomerase A6	Q922R8	1	3.182
Calcium-binding protein 7	Q91ZM8	1	3.721
Adhesion G protein-coupled receptor G3	Q8R0T6	1	2.768
Trem-like transcript 1 protein	Q8K558	1	4.101
Glutamine amidotransferase-like class 1 domain-containing protein 1	Q8BFQ8	1	4.545
Aberrant root formation protein 4	Q84VX3	1	1.118
Intraflagellar transport protein 172 homolog	Q6VH22	1	0.4574
Ubiquitin-like protein ISG15	Q64339	1	5.59
Apoptosis-stimulating of p53 protein 1	Q62415	1	0.92
RNA-binding protein EWS	Q61545	1	2.29
Atypical kinase COQ8A, mitochondrial	Q60936	1	3.721
Transmembrane protein 65	Q4VAE3	1	4.701
Protein transport protein Sec31A	Q3UPL0	1	0.7317
Potassium voltage-gated channel subfamily B member 1	Q14721	1	1.515
Apoptosis regulator BAX	Q07813	1	6.771
Xanthine dehydrogenase/oxidase	Q00519	1	0.5993
Dipeptidyl peptidase 1	P97821	1	2.597
Isochorismatase domain-containing protein 2A	P85094	1	8.252
Bcl-2-like protein 13	P59017	1	2.535
Cytochrome c oxidase subunit 7A1, mitochondrial	P56392	2	16.25
Cystatin-C	P21460	1	7.857
H-2 class II histocompatibility antigen, A beta chain	P14483	1	3.019
Immunoglobulin lambda constant 3	P0DOY3	1	9.434
Lymphocyte antigen 6C2	P0CW03	1	13.74
Prefoldin subunit 2	O70591	1	7.792
Voltage-dependent calcium channel gamma-1 subunit	O70578	1	7.623
Synaptogyrin-2	O55101	1	4.464
Galectin-7	O54974	1	8.088
Synaptosomal-associated protein 23	O09044	1	6.667
Tyrosine-protein phosphatase non-receptor type substrate 1	P97797	1	4.288
Myosin-binding protein H	P70402	1	5.176
Heat shock protein beta-8	Q9JK92	2	9.184
Basal cell adhesion molecule	Q9R069	1	6.27
Beta-glucuronidase	P12265	1	9.259
Dihydropteridine reductase	Q8BVI4	1	4.564
Pyruvate dehydrogenase E1 component subunit beta, mitochondrial	Q9D051	2	17.83
5'-3' exonuclease PLD4	Q8BG07	1	6.561
Methylthioribulose-1-phosphate dehydratase	Q9WVQ5	2	9.129
Signal peptidase complex subunit 2	Q9CYN2	1	6.637
Small ubiquitin-related modifier 3	Q9Z172	1	10.91
Heat shock protein beta-2	Q99PR8	1	20.88
Immunoglobulin superfamily containing leucine-rich repeat protein	Q6GU68	1	6.075
Apoptosis-associated speck-like protein containing a CARD	Q9EPB4	1	8.808
Gamma-synuclein	Q9Z0F7	1	38.21
Carboxylesterase 1D	Q8VCT4	3	12.21
IgG receptor FcRn large subunit p51	Q61559	1	6.575
Cytochrome c oxidase subunit 7C, mitochondrial	P17665	1	28.57
Peptidyl-prolyl cis-trans isomerase FKBP1A	P26883	1	25
Oxygen-regulated protein 1	P56716	1	0.9069
Steryl-sulfatase	P50427	1	5.449
Myosin light chain 6B	Q8CI43	2	14.49
BTB/POZ domain-containing protein KCTD12	Q6WVG3	3	18.35
Serine/threonine-protein phosphatase 2A activator	P58389	2	5.263
Alcohol dehydrogenase 1	P41680	1	4.533
Corrinoid adenosyltransferase	Q9D273	1	9.705
Glypican-1	Q9QZF2	1	3.232
Heterogeneous nuclear ribonucleoprotein F	Q9Z2X1	3	11.33
Secretory carrier-associated membrane protein 2	Q9ERN0	1	7.903
	P29758	1	9.567
Hematopoietic lineage cell-specific protein	P49710	1	4.321
40S ribosomal protein S8	P62242	2	16.83
Cell adhesion molecule 1	Q8R5M8	1	4.167
Major urinary protein 1	P11588	5	41.11
Pro-cathepsin H	P49935	1	6.907
CD82 antigen	P40237	1	8.647
Secretory carrier-associated membrane protein 1	Q8K021	1	6.805
Heme oxygenase 2	O70252	1	6.032
Clathrin light chain A	O08585	2	29.36
Resistin-like gamma	Q8K426	1	18.8
Pyridoxal kinase	Q8K183	1	5.449
Peptidyl-prolyl cis-trans isomerase FKBP10	Q61576	2	10.5
Plasma protease C1 inhibitor	P97290	1	5.556
Dermatopontin	Q9QZZ6	1	5.473
Chitinase-3-like protein 1	Q61362	1	11.83
Histone-binding protein RBBP7	Q60973	1	4
Ras-related protein Rab-5A	Q9CQD1	3	19.07
Protein S100-A13	P97352	1	11.22
Isovaleryl-CoA dehydrogenase, mitochondrial	Q9JHI5	1	4.245
Rhodopsin kinase GRK1	Q9WVL4	1	1.95
Fatty acid-binding protein 5	Q05816	1	11.11
Integrin alpha-6	Q61739	1	3.025
Cardiomyopathy-associated protein 5	Q70KF4	3	3.37
Transmembrane emp24 domain-containing protein 10	Q9D1D4	1	8.676
14-3-3 protein epsilon	P62259	2	16.86
Complement C1q subcomponent subunit B	P14106	1	3.557
60S ribosomal protein L15	Q9CZM2	1	10.29
Target of Myb protein 1	O88746	1	4.878
Neutral amino acid transporter B(0)	P51912	2	4.34
Alpha-2-antiplasmin	Q61247	1	4.481
DnaJ homolog subfamily C member 5	P60904	1	7.576
Telethonin	O70548	1	17.96
Vasodilator-stimulated phosphoprotein	P70460	1	5.067
Rho GDP-dissociation inhibitor 2	Q61599	2	14.5
Fibrillin-1	Q61554	1	1.044
40S ribosomal protein S21	Q9CQR2	1	10.84
Hematopoietic progenitor cell antigen CD34	Q64314	1	5.236
CD9 antigen	P40240	2	14.16
Protein disulfide-isomerase A3	P27773	1	8.911
Tapasin	Q9R233	1	2.151
Ras-related protein Rab-10	P61027	3	21
Lysosomal Pro-X carboxypeptidase	Q7TMR0	1	4.277
Complement C1q subcomponent subunit C	Q02105	1	4.065
Transcription initiation factor TFIID subunit 1	Q8LRK9	1	0.8338
60S ribosomal protein L6	P47911	1	9.122
E3 ubiquitin-protein ligase SINA-like 5	Q7XA77	1	5.488
Actin-related protein 3	Q99JY9	1	2.153
Aldo-keto reductase family 1 member B1	P45376	1	16.14
Small nuclear ribonucleoprotein-associated protein N	P63163	1	6.25
High mobility group protein B1	P63158	1	10.7
Hemoglobin subunit epsilon	Q28496	26	31.97
Non-histone chromosomal protein HMG-17	P09602	1	16.67
Interleukin-1 receptor accessory protein	Q63621	1	4.912
ATP synthase subunit beta, chloroplastic	P19366	5	11.65
Collagen triple helix repeat-containing protein 1	Q9D1D6	1	9.796
CD99 antigen	Q8VCN6	1	35.43
Copine-3	Q8BT60	1	3.377
Proteasome activator complex subunit 3	P61290	1	7.087
Immunoglobulin kappa constant	P01837	1	7.477
Phytanoyl-CoA hydroxylase-interacting protein-like	Q8BGT8	1	1.867
Beta-adrenergic receptor kinase 2	Q3UYH7	1	1.017
Costars family protein ABRACL	Q4KML4	1	11.11
Galectin-3-binding protein	Q07797	1	3.986
Probable disease resistance protein At4g33300	Q9SZA7	1	0.8578
Autophagy-related protein 16-1	Q8C0J2	1	1.647
60S ribosomal protein L18a	P62717	1	9.659
Collagen alpha-1(XI) chain	Q61245	2	4.49
Peptidyl-prolyl cis-trans isomerase FKBP2	P45878	1	8.571
Laminin subunit beta-1	P02469	1	1.736
Leucine-rich repeat-containing protein 45	Q8CIM1	1	4.328
Apolipoprotein C-III	P33622	1	19.19
Histone H1.3	P43277	16	36.2
Immunoglobulin kappa constant	P01834	1	29.91
Cytochrome b-c1 complex subunit 9	Q8R1I1	1	50
60S ribosomal protein L26	P61255	1	15.86
Integrin alpha-L	P24063	1	2.494
Guanine nucleotide-binding protein G(I)/G(S)/G(O) subunit gamma-5	Q80SZ7	1	32.35
Receptor protein kinase-like protein ZAR1	Q9ZU46	1	1.257
Vitamin K-dependent protein C	P33587	1	5.217
Monocarboxylate transporter 7	B1AT66	1	2.965
T-complex protein 1 subunit beta	P80314	1	1.869
Transcription initiation factor TFIID subunit 1	Q8LRK9	1	1.042
Ig lambda-2 chain V region MOPC 315	P01729	1	6.977
26S proteasome non-ATPase regulatory subunit 8	Q9CX56	1	6.516
Protein lin-7 homolog A	Q8JZS0	1	6.867
Sepiapterin reductase	Q64105	1	9.962
Putative E3 ubiquitin-protein ligase ARI4	Q9LVW9	1	2.268
60S ribosomal protein L10a	P53026	1	14.75
Hydroxymethylglutaryl-CoA lyase, mitochondrial	P38060	2	5.538
Eukaryotic translation initiation factor 3 subunit F	Q9DCH4	1	5.54
Zinc finger SWIM domain-containing protein 8	Q3UHH1	1	2.402
Probable LRR receptor-like serine/threonine-protein kinase At4g37250	C0LGS3	1	1.693
Histidine protein kinase SLN1	Q5A872	1	0.5827
Probable crossover junction endonuclease EME2	Q56A04	1	2.145

## Sheet: WT
Protein name	Uniprot Code	Peptides(95%)	%Cov
Filamin-A	Q8BTM8	136	65.43
Myosin-4	Q5SX39	96	55.8
Collagen alpha-1(I) chain	P11087	1263	79.77
Collagen alpha-2(I) chain	Q01149	918	82.22
Talin-1	P26039	96	50.02
Albumin	P07724	419	87.34
Collagen alpha-1(XII) chain	Q60847	76	35.77
Vinculin	Q64727	57	59.01
Serotransferrin	Q921I1	112	78.48
Spectrin alpha chain, non-erythrocytic 1	P16546	46	33.54
Pregnancy zone protein	Q61838	64	46.49
Filamin-C	Q8VHX6	49	34.37
Lactotransferrin	P08071	62	70.3
Alpha-actinin-3	O88990	46	51.78
Transketolase	P40142	79	67.9
Creatine kinase M-type	P07310	207	89.24
Nascent polypeptide-associated complex subunit alpha, muscle-specific form	P70670	35	34.48
Sarcoplasmic/endoplasmic reticulum calcium ATPase 1	Q8R429	54	46.68
Complement C3	P01027	33	37.04
Actin, alpha skeletal muscle	P68135	281	83.29
Vimentin	P20152	40	78.33
Murinoglobulin-1	P28665	42	41.33
Heat shock cognate 71 kDa protein	P63017	43	57.74
Tropomyosin alpha-1 chain	P58771	33	75
Fructose-bisphosphate aldolase A	P05064	69	91.21
Hemoglobin subunit alpha	P01942	253	98.59
Plastin-2	Q61233	40	65.87
Fibronectin	P11276	25	22.85
Beta-enolase	P21550	64	65.9
Aspartate aminotransferase, mitochondrial	P05202	58	80
Aspartate aminotransferase, cytoplasmic	P05201	39	79.66
Leukotriene A-4 hydrolase	P24527	29	56.96
Transitional endoplasmic reticulum ATPase	Q01853	26	54.71
Hemoglobin subunit beta-1	P02088	267	99.32
Myosin light chain 1/3, skeletal muscle isoform	P05977	151	93.09
Elongation factor 2	P58252	23	40.91
Integrin beta-2	P11835	31	46.95
Integrin alpha-M	P05555	36	42.5
Phosphoglucomutase-1	Q9D0F9	30	61.03
Myeloperoxidase	P11247	30	47.49
Transferrin receptor protein 1	Q62351	23	37.48
Chitinase-like protein 3	O35744	65	73.62
Myosin-binding protein C, fast-type	Q5XKE0	25	38.2
Prolargin	Q9JK53	45	73.28
Isoform 4 of LIM domain-binding protein 3	Q9JKS4-4	58	71.54
60 kDa heat shock protein, mitochondrial	P63038	26	54.62
CD177 antigen	Q8R2S8	25	43.94
Titin	A2ASS6	21	2.366
Hemopexin	Q91X72	35	63.04
Glucose-6-phosphate isomerase	P06745	33	69.35
Voltage-dependent calcium channel subunit alpha-2/delta-1	O08532	20	29.01
Collagen alpha-1(II) chain	P28481	149	52.59
Isoform 2 of Gelsolin	P13020-2	27	45.14
Cytoskeleton-associated protein 4	Q8BMK4	19	49.22
Phosphoglycerate mutase 2	O70250	57	79.84
Apolipoprotein A-I	Q00623	24	67.8
Methanethiol oxidase	P17563	22	62.08
Glycogen phosphorylase, muscle form	Q9WUB3	20	36.1
Myosin regulatory light chain 2, skeletal muscle isoform	P97457	74	92.9
Keratin, type II cytoskeletal 1	P04264	24	35.4
Malate dehydrogenase, mitochondrial	P08249	37	68.34
Desmin	P31001	24	53.73
Decorin	P28654	34	60.73
Alpha-actinin-1	Q7TPR4	29	45.74
Ras GTPase-activating-like protein IQGAP1	Q9JKF1	19	24.2
Myosin-1	Q5SX40	84	49.49
Dihydrolipoyl dehydrogenase, mitochondrial	O08749	28	55.6
Isoform Cytoplasmic of Glutathione reductase, mitochondrial	P47791-2	22	74.89
Stress-70 protein, mitochondrial	P38647	21	41.38
Isoform M1 of Pyruvate kinase PKM	P52480-2	18	43.88
Triosephosphate isomerase	P17751	46	91.16
Alpha-1-antitrypsin 1-4	Q00897	45	48.91
Serine protease inhibitor A3K	P07759	30	34.21
Ribosome-binding protein 1	Q99PL5	16	21.62
Transcription intermediary factor 1-beta	Q62318	16	36.21
Filamin-B	Q80X90	23	19.95
L-lactate dehydrogenase A chain	P06151	27	60.84
Carboxylesterase 1C	P23953	18	39.89
Carbonic anhydrase 3	P16015	18	74.62
WD repeat-containing protein 1	O88342	16	58.75
Tenascin-N	Q80Z71	17	29.17
ATP synthase subunit alpha, mitochondrial	Q03265	18	49.91
Four and a half LIM domains protein 1	P97447	25	72.14
Creatine kinase S-type, mitochondrial	Q6P8J7	30	55.61
Annexin A1	P10107	17	65.32
Leukocyte elastase inhibitor A	Q9D154	18	52.51
Collagen alpha-2(V) chain	Q3U962	94	39.21
Sialoadhesin	Q62230	14	18.47
Peroxiredoxin-1	P35700	19	79.4
Phosphoglycerate kinase 1	P09411	19	52.28
Adenylyl cyclase-associated protein 1	P40124	19	51.48
Peroxiredoxin-2	Q61171	24	77.78
Endoplasmic reticulum chaperone BiP	P20029	16	36.64
Collagen alpha-1(III) chain	P08121	56	37.3
ATP synthase subunit beta, mitochondrial	P56480	24	56.9
Aconitate hydratase, mitochondrial	Q99KI0	14	34.49
Glyceraldehyde-3-phosphate dehydrogenase	P16858	24	63.96
Myoglobin	P04247	43	87.01
Dihydrolipoyllysine-residue succinyltransferase component of 2-oxoglutarate dehydrogenase complex, mitochondrial	Q9D2G2	28	47.8
Isoform PLEC-1I of Plectin	Q9QXS1-16	14	9.133
Basement membrane-specific heparan sulfate proteoglycan core protein	Q05793	18	10.95
Biglycan	P28653	28	53.93
Lumican	P51885	23	45.86
Elongation factor 1-alpha 1	P62630	22	53.46
ATP synthase subunit d, mitochondrial	Q9DCX2	20	83.85
Oxygen-dependent coproporphyrinogen-III oxidase, mitochondrial	P36552	14	37.92
Isocitrate dehydrogenase [NAD] subunit alpha, mitochondrial	Q9D6R2	17	48.91
Alpha-actinin-2	Q9JI91	31	50
Parvalbumin alpha	P32848	31	91.82
Isoform Cytoplasmic of Fumarate hydratase, mitochondrial	P97807-2	16	47.11
Alkaline phosphatase, tissue-nonspecific isozyme	P09242	14	43.7
Tubulin alpha chain	P08537	16	41.2
Transgelin-2	Q9WVA4	18	65.33
Beta-glucuronidase	P12265	20	33.49
Actin, cytoplasmic 1	P60712	169	87.73
Far upstream element-binding protein 2	Q3U0V1	14	33.69
Calpain-1 catalytic subunit	O35350	11	29.03
ADP/ATP translocase 1	P48962	16	59.73
Integrin beta-1	P09055	10	25.69
Isoform LMW of Kininogen-1	O08677-2	13	43.06
Apolipoprotein A-IV	P06728	13	57.22
Dihydropyrimidinase-related protein 2	O08553	13	47.2
Histone H2B type 1-L	Q99880	54	70.63
Synaptic vesicle membrane protein VAT-1 homolog	Q62465	15	47.29
Isoform 3 of 2-oxoglutarate dehydrogenase, mitochondrial	Q60597-3	12	18.4
Lactadherin	P21956	15	43.63
Neutrophil collagenase	O70138	12	27.53
PDZ and LIM domain protein 1	O70400	12	60.55
Guanine deaminase	Q9R111	12	46.92
Platelet glycoprotein 4	Q08857	13	35.81
Carbonic anhydrase 1	P13634	12	70.11
Antithrombin-III	P32261	13	49.25
Glutathione peroxidase 1	P11352	12	81.09
Proteasome activator complex subunit 1	P97371	12	49.8
Vitamin D-binding protein	P21614	11	31.72
40S ribosomal protein SA	P14206	14	65.42
Peroxiredoxin-6	O08709	11	66.07
Ceruloplasmin	Q61147	12	27.71
Histone H2A type 1-J	Q99878	36	44.53
Alpha-2-HS-glycoprotein	P29699	33	60
Aminopeptidase N	P97449	13	24.53
Histone H1.2	P15864	21	37.74
Ferritin heavy chain	P09528	17	71.98
Protein S100-A9	P31725	47	84.07
Hypoxanthine-guanine phosphoribosyltransferase	P00493	9	72.94
Tripartite motif-containing protein 72	Q1XH17	12	55.35
Superoxide dismutase [Mn], mitochondrial	P09671	19	54.5
Ferritin light chain 1	P29391	37	78.69
Ras-related protein Rab-7a	P51150	14	74.4
Ras-related protein Rab-11B	P46638	12	61.01
Electron transfer flavoprotein subunit beta	Q9DCW4	12	43.53
Beta-galactosidase	P23780	11	26.12
Peroxiredoxin-5, mitochondrial	P99029	15	57.14
Myosin light chain 3	P09542	32	81.86
Collagen alpha-1(VI) chain	Q04857	10	24.1
Very long-chain specific acyl-CoA dehydrogenase, mitochondrial	P50544	11	34.91
40S ribosomal protein S19	Q9CZX8	10	57.93
Collagen alpha-1(XI) chain	Q61245	28	18.13
Haptoglobin	Q61646	15	44.09
Keratocan	O35367	11	51.57
Heat shock protein beta-1	P14602	10	60.77
Peptidyl-prolyl cis-trans isomerase A	P17742	25	70.73
Aggrecan core protein	Q61282	10	7.411
Membrane primary amine oxidase	O70423	11	22.35
Tropomyosin beta chain	P58774	18	66.9
Cytochrome b-c1 complex subunit Rieske, mitochondrial	Q9CR68	10	63.14
Malate dehydrogenase, cytoplasmic	P14152	10	44.31
Voltage-dependent anion-selective channel protein 1	Q60932	10	55.74
Lysosomal alpha-mannosidase	O09159	10	22.61
Xanthine dehydrogenase/oxidase	Q00519	9	16.03
Collagen alpha-2(VI) chain	Q02788	11	17.41
Superoxide dismutase [Cu-Zn]	P08228	13	75.32
14-3-3 protein zeta/delta	P63102	9	52.65
Porphobilinogen deaminase	P22907	12	43.49
Acylamino-acid-releasing enzyme	Q8R146	10	25.68
Aldehyde dehydrogenase, mitochondrial	P47738	10	35.26
Poly(rC)-binding protein 1	P60335	10	38.48
PDZ and LIM domain protein 3	O70209	13	49.37
Integrin alpha-IIb	Q9QUM0	9	19.65
Aspartate--tRNA ligase, cytoplasmic	Q922B2	10	32.93
Adenylate kinase isoenzyme 1	Q9R0Y5	12	56.7
Nucleoside diphosphate kinase B	Q01768	11	78.95
Fibrillin-1	Q61554	10	8.319
Protein disulfide-isomerase A3	P27773	11	31.68
Dynactin subunit 2	Q99KJ8	11	39.3
Leucine-rich repeat-containing protein 59	Q922Q8	9	47.56
EF-hand domain-containing protein D2	Q4FZY0	11	47.28
Neutrophilic granule protein	O08692	10	58.68
Protein NDRG2	Q9QYG0	16	56.33
Annexin A2	P07356	9	42.48
H-2 class I histocompatibility antigen, D-B alpha chain	P01899	9	35.36
Cofilin-1	P18760	9	74.7
Transaldolase	Q93092	8	43.03
Histone H4	P62806	14	57.28
Stress-induced-phosphoprotein 1	Q60864	9	32.97
Thioredoxin-dependent peroxide reductase, mitochondrial	P20108	14	61.48
Alpha-actinin-4	P57780	21	39.69
BAG family molecular chaperone regulator 3	Q9JLV1	9	30.68
2,4-dienoyl-CoA reductase [(3E)-enoyl-CoA-producing], mitochondrial	Q9CQ62	9	46.27
Glutamine amidotransferase-like class 1 domain-containing protein 3A, mitochondrial	Q9D172	9	57.14
4-trimethylaminobutyraldehyde dehydrogenase	Q9JLJ2	8	29.96
6-phosphogluconolactonase	Q9CQ60	8	49.81
Adenosylhomocysteinase	P50247	7	37.04
Isoform 2 of Sarcalumenin	Q7TQ48-1	9	21.43
Reticulon-4	Q99P72	9	11.96
Long-chain specific acyl-CoA dehydrogenase, mitochondrial	P51174	9	30.47
Myozenin-1	Q9JK37	10	61.82
Carbonic anhydrase 2	P00920	15	61.54
Fibromodulin	P50608	22	27.93
Ribonuclease inhibitor	Q91VI7	12	39.69
CYFIP-related Rac1 interactor B	Q921M7	11	45.37
Ras-related protein Rap-1b	Q99JI6	12	59.24
Nicastrin	P57716	9	13.98
Lactoylglutathione lyase	Q9CPU0	9	44.02
Cathepsin S	O70370	9	36.76
NADH dehydrogenase [ubiquinone] 1 beta subcomplex subunit 10	Q9DCS9	8	59.66
Alpha-enolase	P17182	31	65.9
Cadherin-13	Q9WTR5	9	23.95
Ubiquitin-60S ribosomal protein L40	P62984	19	56.25
Troponin T, fast skeletal muscle	Q9QZ47	9	31.62
Acid ceramidase	Q9WV54	9	29.44
Clusterin	Q06890	8	26.79
Caveolin-1	P49817	9	68.54
Laminin subunit alpha-2	Q60675	7	7.986
Troponin C, skeletal muscle	P20801	13	65
Heterogeneous nuclear ribonucleoprotein M	Q9D0E1	7	17.28
Enoyl-CoA delta isomerase 1, mitochondrial	P42125	9	38.41
Annexin A6	P14824	8	20.06
Isocitrate dehydrogenase [NADP] cytoplasmic	O88844	7	36.71
Phosphoglycerate mutase 1	Q9DBJ1	26	72.83
Myeloblastin	Q61096	11	45.28
Reticulon-2	O70622	13	23.57
Cytochrome c, somatic	P62898	8	61.9
MLV-related proviral Env polyprotein	P10404	7	18.56
Vesicular integral-membrane protein VIP36	Q9DBH5	8	35.75
Tubulin beta-5 chain	P99024	7	43.47
Phosphatidylethanolamine-binding protein 1	P70296	21	86.1
Cytochrome c oxidase subunit 4 isoform 1, mitochondrial	P19783	9	57.99
Cytosol aminopeptidase	Q9CPY7	7	30.64
Serine hydroxymethyltransferase, mitochondrial	Q9CZN7	8	24.6
Succinate dehydrogenase [ubiquinone] flavoprotein subunit, mitochondrial	Q8K2B3	7	22.74
Integrin beta-2-like protein	Q3UV74	9	14.5
Alpha-1-antitrypsin 1-5	Q00898	58	53.51
Citrate synthase, mitochondrial	Q9CZU6	7	24.57
Chondroadherin	O55226	8	35.47
Cytochrome b-c1 complex subunit 7	Q9D855	8	60.36
Prosaposin	Q61207	7	22.98
Nucleobindin-1	Q02819	9	31.15
40S ribosomal protein S3	P62908	6	39.09
Electron transfer flavoprotein subunit alpha, mitochondrial	Q99LC5	7	55.26
Prothrombin	P19221	7	18.93
4F2 cell-surface antigen heavy chain	P10852	7	29.85
Nidogen-1	P10493	9	13.49
GTP-binding nuclear protein Ran	P62827	7	45.37
Rho GDP-dissociation inhibitor 1	Q99PT1	8	62.75
Ras-related protein Rab-1A	P62821	7	58.05
Purine nucleoside phosphorylase	P23492	7	55.71
Cytochrome c oxidase subunit 6B1	P56391	8	70.93
Collagen alpha-2(XI) chain	Q64739	36	17.74
Integrin beta-3	O54890	7	19.19
Ribose-5-phosphate isomerase	P47968	7	31.68
Neutrophil gelatinase-associated lipocalin	P11672	16	58.5
Inositol monophosphatase 1	O55023	7	30.69
Zyxin	Q62523	8	20.92
Periostin	Q62009	8	20.64
Integrin alpha-V	P43406	7	16.76
ATP synthase subunit O, mitochondrial	Q9DB20	11	57.75
Isoform 2 of Basigin	P18572-2	8	39.19
Delta-aminolevulinic acid dehydratase	P10518	6	30
40S ribosomal protein S5	P97461	8	45.1
Synaptopodin-2	Q91YE8	6	9.752
Ankyrin repeat domain-containing protein 2	Q9WV06	7	32.32
Proteasome activator complex subunit 3	P61290	6	35.43
Cell division control protein 42 homolog	Q90694	6	42.41
Ras-related protein Rab-5C	P35278	6	36.57
Lysosome-associated membrane glycoprotein 2	P17047	6	14.22
Actin-related protein 2/3 complex subunit 1B	Q9WV32	7	33.06
Heterogeneous nuclear ribonucleoprotein A/B	Q99020	6	30.53
Catalase	P24270	7	23.91
ADP-ribosylation factor 3	P61205	6	49.17
Histone H1.5	P43276	11	31.39
Prohibitin	P67778	6	49.26
Heat shock protein beta-6	Q5EBG6	9	72.22
Mitochondrial antiviral-signaling protein	Q8VCF0	6	28.23
Dihydrolipoyllysine-residue acetyltransferase component of pyruvate dehydrogenase complex, mitochondrial	Q8BMF4	7	22.59
MICOS complex subunit Mic60	Q8CAQ8	6	26.68
Transthyretin	P07309	9	66.67
Troponin I, fast skeletal muscle	P13412	10	51.65
Cysteine and glycine-rich protein 3	P50462	6	56.7
F-actin-capping protein subunit alpha-2	P47754	7	41.96
Tubulin polymerization-promoting protein family member 3	Q9CRB6	8	42.61
Glycerol-3-phosphate dehydrogenase, mitochondrial	Q64521	8	17.19
Matrix metalloproteinase-9	P41245	7	23.56
Far upstream element-binding protein 1	Q91WJ8	7	18.28
Heterogeneous nuclear ribonucleoprotein K	P61979	7	28.51
Tetranectin	P43025	9	71.78
Inositol-3-phosphate synthase 1	Q9JHU9	6	20.29
Succinate dehydrogenase [ubiquinone] iron-sulfur subunit, mitochondrial	Q9CQA3	6	31.56
Sorcin	Q6P069	9	40.91
Cathepsin B	P10605	11	33.33
Phospholipase B-like 1	Q8VCI0	5	20.18
NADH dehydrogenase [ubiquinone] 1 alpha subcomplex subunit 8	Q9DCJ5	10	63.95
Laminin subunit gamma-1	P02468	6	9.77
Galectin-3-binding protein	Q07797	7	21.66
Cathepsin G	P28293	6	28.35
Endoplasmic reticulum metallopeptidase 1	Q3UVK0	5	13.03
Thioredoxin reductase 1, cytoplasmic	Q9JMH6	7	15.5
Fatty acid-binding protein, heart	P11404	10	64.66
Myosin regulatory light chain 2, ventricular/cardiac muscle isoform	P51667	6	59.64
Galectin-1	P16045	7	74.81
40S ribosomal protein S10	P63325	5	51.52
Persulfide dioxygenase ETHE1, mitochondrial	Q9DCM0	9	55.51
Microtubule-associated protein 4	P27546	9	29.24
Lamin-B1	P14733	6	21.09
Choline transporter-like protein 2	Q8BY89	7	16.29
Proliferating cell nuclear antigen	P17918	6	26.05
Integrin alpha-7	Q61738	6	12.38
Alcohol dehydrogenase class-3	P28474	8	51.6
Thrombospondin-4	Q9Z1T2	5	14.02
Serine/threonine-protein phosphatase 2A catalytic subunit alpha isoform	P63330	6	40.45
Four and a half LIM domains protein 3	Q9R059	5	34.6
Lysosome-associated membrane glycoprotein 1	P11438	8	18.97
Inter-alpha-trypsin inhibitor heavy chain H1	Q61702	8	12.9
Translationally-controlled tumor protein	P63028	15	74.42
Mammalian ependymin-related protein 1	Q99M71	5	28.57
Adhesion G protein-coupled receptor E5	Q9Z0M6	6	14.55
Cysteine and glycine-rich protein 1	P97315	5	41.97
NADH dehydrogenase [ubiquinone] iron-sulfur protein 8, mitochondrial	Q8K3J1	5	33.96
Hippocalcin-like protein 1	P62748	6	40.41
Phosphate-regulating neutral endopeptidase PHEX	P70669	6	30.57
Galectin-3	P16110	6	26.89
Collagen alpha-1(XV) chain	O35206	5	6.145
Pre-mRNA-processing factor 19	Q9JMJ4	6	17.86
Cathelicidin antimicrobial peptide	P51437	17	56.98
Tenascin-X	P22105	11	6.032
Transforming growth factor-beta-induced protein ig-h3	P82198	6	23.72
Endoplasmin	P08113	5	10.1
Ras-related protein Rab-14	Q91V41	6	66.05
Medium-chain specific acyl-CoA dehydrogenase, mitochondrial	P45952	5	19.95
Ubiquinone biosynthesis protein COQ9, mitochondrial	Q8K1Z0	5	26.52
Tumor protein D52	Q62393	5	27.68
Fatty acid-binding protein, adipocyte	P04117	6	50
Insulin-degrading enzyme	Q9JHR7	7	21.1
Programmed cell death 6-interacting protein	Q9WU78	5	13.35
3-ketoacyl-CoA thiolase, mitochondrial	Q8BWT1	5	33
von Willebrand factor A domain-containing protein 5A	Q99KC8	6	17.28
Calcium-binding protein 39	Q06138	5	14.66
Tenascin	Q80YX1	6	8.768
Aspartyl aminopeptidase	Q9Z2W0	5	20.51
Isocitrate dehydrogenase [NADP], mitochondrial	P54071	6	21.46
Keratin, type I cytoskeletal 10	P02535	9	16.49
Splicing factor 3B subunit 3	Q921M3	5	12.33
Isoform 2 of PDZ and LIM domain protein 7	Q3TJD7-2	4	45.21
Cathepsin D	P18242	5	19.51
Clathrin heavy chain 1	Q68FD5	5	7.701
RNA transcription, translation and transport factor protein	Q9CQE8	5	43.03
Apolipoprotein E	P08226	7	39.87
Sorbitol dehydrogenase	Q64442	5	24.37
Glycerol-3-phosphate phosphatase	Q8CHP8	6	26.79
Proteasome activator complex subunit 2	P97372	5	31.38
Cartilage intermediate layer protein 2	D3Z7H8	6	6.196
40S ribosomal protein S18	P62270	5	46.05
H-2 class II histocompatibility antigen, A beta chain	P14483	6	32.08
Long-chain-fatty-acid--CoA ligase 1	P41216	5	22.17
Hemoglobin subunit beta	P11758	115	52.05
Hyaluronan and proteoglycan link protein 1	Q9QUP5	5	25.56
ATP-dependent (S)-NAD(P)H-hydrate dehydratase	Q9CZ42	5	38.19
Eosinophil cationic protein 1	P97426	8	60
D-dopachrome decarboxylase	O35215	6	69.49
40S ribosomal protein S17	P63276	5	42.22
Pigment epithelium-derived factor	P97298	5	19.66
Histone H1.1	P43275	12	36.62
BTB/POZ domain-containing protein KCTD12	Q6WVG3	5	22.94
Sushi domain-containing protein 2	Q9DBX3	6	12.8
MIC	Q9DCZ4	7	37.37
Peroxisomal acyl-coenzyme A oxidase 1	Q9R0H0	6	20.42
Ribonucleoside-diphosphate reductase subunit M2	P11157	4	28.72
Cytochrome c oxidase subunit 5A, mitochondrial	P12787	6	65.75
Protein NipSnap homolog 3B	Q9CQE1	4	37.25
Actin-related protein 2/3 complex subunit 4	P59999	5	41.07
Heme oxygenase 1	P14901	8	39.45
10 kDa heat shock protein, mitochondrial	Q64433	6	57.84
Translin	Q62348	4	32.89
Ribonucleoside-diphosphate reductase large subunit	P07742	5	12.63
Sorting and assembly machinery component 50 homolog	Q8BGH2	4	19.83
Lysozyme C-2	P08905	22	59.46
Ubiquitin-conjugating enzyme E2 L3	P68037	4	49.35
Peroxiredoxin-4	O08807	9	43.43
Thioredoxin domain-containing protein 5	Q91W90	4	20.14
Laminin subunit beta-2	Q61292	4	6.448
Isoform 2 of F-actin-capping protein subunit beta	P47757-2	4	27.57
40S ribosomal protein S25	P62852	5	43.2
Macrophage migration inhibitory factor	P34884	10	59.13
Isoform 3 of Reticulon-3	Q9ES97-3	5	34.6
Alpha-1-antitrypsin 1-1	P07758	58	50.12
60S ribosomal protein L12	P35979	4	50.91
Tumor protein D54	Q9CYZ2	8	32.73
Fibrinogen alpha chain	E9PV24	6	12.55
Phosphatidylinositol-binding clathrin assembly protein	Q7M6Y3	5	11.21
Selenide, water dikinase 1	Q8BH69	6	20.66
Prolow-density lipoprotein receptor-related protein 1	Q91ZX7	5	3.564
Ubiquilin-2	Q9QZM0	5	11.44
Cation-dependent mannose-6-phosphate receptor	P24668	4	21.22
Glycerol-3-phosphate dehydrogenase [NAD(+)], cytoplasmic	P13707	5	28.37
Calpastatin	P51125	4	11.17
Tropomyosin alpha-3 chain	P21107	20	57.89
NADH dehydrogenase [ubiquinone] flavoprotein 2, mitochondrial	Q9D6J6	4	43.95
5'-3' exonuclease PLD3	O35405	5	11.27
Immunoglobulin heavy constant mu	P01872	4	32.6
SPARC	P07214	4	19.54
Aldehyde dehydrogenase family 3 member B1	Q80VQ0	6	21.58
Integrin alpha-L	P24063	4	8.598
Creatine kinase B-type	Q04447	26	43.04
Actin-related protein 2/3 complex subunit 3	Q9JM76	5	45.51
Thrombospondin-1	P35441	6	7.265
Isoform 2 of Myc box-dependent-interacting protein 1	O08539-2	5	37.79
NADH-ubiquinone oxidoreductase 75 kDa subunit, mitochondrial	Q91VD9	4	16.51
Isoform 2 of Tyrosine-protein phosphatase non-receptor type substrate 1	P97797-2	5	18.66
Proteasome subunit alpha type-7	Q9Z2U0	4	36.29
Neuroplastin	P97300	4	13.85
Flavin reductase (NADPH)	Q923D2	4	28.64
NADH dehydrogenase [ubiquinone] 1 beta subcomplex subunit 8, mitochondrial	Q9D6J5	7	36.02
Calmodulin-3	P0DP28	7	41.61
Beta-hexosaminidase subunit beta	P20060	5	25.19
Neutral alpha-glucosidase AB	Q8BHN3	4	8.686
Caspase-3	P70677	4	19.49
Calponin-2	Q08093	4	24.26
Multifunctional protein ADE2	Q9DCL9	5	22.82
T-complex protein 1 subunit beta	P80314	4	22.06
U1 small nuclear ribonucleoprotein A	Q62189	4	25.44
Transforming protein RhoA	Q9QUI0	6	37.31
Mimecan	Q62000	4	33.89
Band 3 anion transport protein	P04919	4	8.611
Leukocyte surface antigen CD47	Q61735	5	21.45
Cytochrome b-c1 complex subunit 2, mitochondrial	Q9DB77	5	28.48
Beta-2-glycoprotein 1	Q01339	5	28.7
Major urinary protein 11	P04938	6	63.54
Adiponectin	Q60994	5	24.29
Thioredoxin	P10639	4	57.14
Ectonucleoside triphosphate diphosphohydrolase 1	P55772	4	24.31
Cytosolic non-specific dipeptidase	Q9D1A2	4	12.63
Large proline-rich protein BAG6	Q9Z1R2	4	6.412
ADP-ribosylation factor-like protein 8B	Q9CQW2	4	33.33
NADH dehydrogenase [ubiquinone] iron-sulfur protein 3, mitochondrial	Q9DCT2	4	35.74
Proteasome subunit alpha type-5	Q9Z2U1	5	24.07
Serpin H1	P19324	6	20.38
NADH dehydrogenase [ubiquinone] 1 alpha subcomplex subunit 5	Q9CPP6	5	59.48
Ras-related C3 botulinum toxin substrate 2	Q05144	4	38.02
Glutathione S-transferase Mu 1	P10649	4	32.11
Peptidyl-prolyl cis-trans isomerase FKBP10	Q61576	5	18.93
Ras-related protein Rab-3D	P35276	5	45.66
Histone-binding protein RBBP4	Q60972	4	16
Integrin alpha-6	Q61739	4	9.349
Actin-related protein 2/3 complex subunit 5	Q9CPW4	4	42.38
Myocilin	O70624	3	17.55
Serine/threonine-protein phosphatase 6 catalytic subunit	Q9CQR6	3	29.84
ATP synthase subunit e, mitochondrial	Q06185	5	61.97
Vascular cell adhesion protein 1	P29533	4	12.86
Dipeptidyl peptidase 4	P28843	3	9.868
Protein CREG1	O88668	4	21.36
Alanine--tRNA ligase, cytoplasmic	Q8BGQ7	4	14.05
Ubiquitin carboxyl-terminal hydrolase 5	P56399	3	12.59
Hemoglobin subunit alpha-1/2	P01948	30	66.2
Lamina-associated polypeptide 2, isoforms beta/delta/epsilon/gamma	Q61029	4	11.95
Myosin-9	Q8VDD5	5	5.816
Pro-cathepsin H	P49935	5	21.32
Sulfhydryl oxidase 1	Q8BND5	4	8.824
Ubiquitin-conjugating enzyme E2 N	P61089	3	38.16
Glutathione peroxidase 3	P46412	7	23.01
Bone marrow proteoglycan	Q61878	5	30.04
Polypyrimidine tract-binding protein 1	P17225	5	15.18
Rho GDP-dissociation inhibitor 2	Q61599	13	73.5
Phosphate carrier protein, mitochondrial	Q8VEM8	3	26.33
Olfactomedin-4	Q3UZZ4	3	16.44
Alpha-crystallin B chain	P23927	3	48
Glycolipid transfer protein	Q9JL62	4	42.58
Leukosialin	P15702	5	26.33
Transgelin	P37804	4	28.86
Lysosome membrane protein 2	O35114	4	16.53
Poly(rC)-binding protein 2	Q61990	5	20.17
Cytochrome b-c1 complex subunit 1, mitochondrial	Q9CZ13	6	25.83
Glucosamine-6-phosphate isomerase 1	O88958	4	31.49
Glycerophosphoinositol inositolphosphodiesterase GDPD2	Q9ESM6	3	9.833
Perilipin-3	Q9DBG5	5	37.99
Fatty acid-binding protein 5	Q05816	4	25.93
Apoptosis-associated speck-like protein containing a CARD	Q9EPB4	3	40.41
Retinal dehydrogenase 1	P24549	5	23.55
Actin-related protein 3	Q99JY9	5	24.4
Neutrophil cytosol factor 2	O70145	3	7.619
GTP:AMP phosphotransferase AK3, mitochondrial	Q9WTP7	3	22.47
Vesicle-associated membrane protein-associated protein A	Q9WV55	3	26.91
Actin-related protein 3	Q99JY9	5	24.4
Glutathione S-transferase omega-1	O09131	4	31.67
Proteasome subunit alpha type-6	Q9QUM9	3	23.58
Caveolae-associated protein 1	O54724	4	25
Peptidoglycan recognition protein 1	O88593	3	41.21
Perilipin-4	O88492	4	26.87
H-2 class I histocompatibility antigen, Q10 alpha chain	P01898	6	35.08
Cytochrome b5 type B	Q9CQX2	3	62.33
Early endosome antigen 1	Q8BL66	4	8.717
Aminoacyl tRNA synthase complex-interacting multifunctional protein 1	P31230	3	23.23
Xaa-Pro dipeptidase	Q11136	3	20.49
Vitronectin	P29788	3	11.51
Serine incorporator 3	Q9QZI9	3	8.051
Enoyl-CoA hydratase, mitochondrial	Q8BH95	4	31.38
5'-3' exonuclease PLD4	Q8BG07	4	10.93
Glutathione S-transferase P 1	P19157	4	31.9
Sterol carrier protein 2	P32020	3	7.313
Histone H1.4	P43274	19	31.96
Protein S100-A11	P50543	5	43.88
Myozenin-2	Q9JJW5	4	24.24
Serpin B6	Q60854	5	26.19
COP9 signalosome complex subunit 8	Q8VBV7	4	23.92
Intercellular adhesion molecule 1	P13597	3	10.24
Adenylosuccinate lyase	P54822	3	18.6
von Willebrand factor	Q8CIZ8	4	3.413
Receptor of activated protein C kinase 1	P68040	5	24.61
Annexin A5	P48036	3	16.93
Neutrophil elastase	Q3UP87	3	15.09
T-complex protein 1 subunit delta	P80315	3	17.44
Ganglioside GM2 activator	Q60648	3	29.53
Extracellular superoxide dismutase [Cu-Zn]	O09164	4	23.9
Programmed cell death protein 6	P12815	4	36.65
ATP synthase subunit delta, mitochondrial	Q9D3D9	12	46.43
Heterogeneous nuclear ribonucleoproteins A2/B1	O88569	3	11.61
Voltage-dependent anion-selective channel protein 2	Q60930	5	24.07
14-3-3 protein epsilon	P62259	6	40.78
Nucleoporin p58/p45	Q8R332	4	10.73
Caprin-1	Q60865	3	7.921
Aquaporin-1	Q02013	3	13.38
Bcl-2 homologous antagonist/killer	O08734	3	42.58
Calpain small subunit 1	O88456	9	55.39
14-3-3 protein theta	P68254	6	41.63
Protein PRRC1	Q3UPH1	3	14.45
NADH dehydrogenase [ubiquinone] flavoprotein 1, mitochondrial	Q91YT0	5	22.84
Heterogeneous nuclear ribonucleoprotein F	Q9Z2X1	4	21.45
NADH dehydrogenase [ubiquinone] 1 alpha subcomplex subunit 6	Q9CQZ5	5	37.4
Nucleoside diphosphate kinase A	P15532	9	70.39
Transmembrane emp24 domain-containing protein 9	Q99KF1	5	33.62
Isoform D of Cytosolic acyl coenzyme A thioester hydrolase	Q91V12-4	3	13.72
Ubiquitin-conjugating enzyme E2 C	Q9D1C1	3	44.13
Vesicle-associated membrane protein-associated protein B	Q9QY76	2	27.57
Acid sphingomyelinase-like phosphodiesterase 3a	P70158	3	18.2
Myosin-8	P13542	57	41.15
Spectrin beta chain, non-erythrocytic 1	Q62261	4	6.475
Dipeptidase 1	P31428	3	11.71
Na(+)/H(+) exchange regulatory cofactor NHE-RF1	P70441	4	16.62
Parkinson disease protein 7 homolog	Q99LX0	3	32.8
Ectonucleotide pyrophosphatase/phosphodiesterase family member 1	P06802	3	6.843
Ubiquitin-like modifier-activating enzyme 1	Q02053	3	7.278
Cardiomyopathy-associated protein 5	Q70KF4	3	3.076
Profilin-1	P62962	4	44.29
Mitochondrial fission 1 protein	Q9CQ92	4	49.34
Nuclear pore glycoprotein p62	Q63850	3	7.985
LIM and SH3 domain protein 1	Q61792	3	12.17
CDGSH iron-sulfur domain-containing protein 2	Q9CQB5	3	55.56
Thy-1 membrane glycoprotein	P01831	3	25.93
Myristoylated alanine-rich C-kinase substrate	P26645	3	18.12
L-lactate dehydrogenase B chain	P16125	5	28.14
Versican core protein	Q62059	3	2.532
Importin subunit alpha-1	P52293	3	12.1
Beta-hexosaminidase subunit alpha	P29416	3	11.55
Endophilin-B1	Q9JK48	3	19.73
Myomesin-1	Q62234	4	6.539
Stomatin	P54116	3	21.83
Immunoglobulin kappa constant	P01837	3	35.51
S-methyl-5'-thioadenosine phosphorylase	Q9CQ65	3	21.55
Acyl-CoA-binding protein	P31786	3	57.47
Cytochrome c oxidase subunit 6C	Q9CPQ1	4	68.42
N-acetylgalactosamine-6-sulfatase	Q571E4	3	10
Elongin-B	P62869	4	59.32
Isoform 2 of Synaptophysin-like protein 1	O09117-2	4	11.11
Dystroglycan	Q62165	3	7.503
6-phosphogluconate dehydrogenase, decarboxylating	Q9DCD0	3	13.87
Lysosomal Pro-X carboxypeptidase	Q7TMR0	3	10.79
Arylsulfatase B	P50429	4	12.55
Acetyl-CoA acetyltransferase, mitochondrial	Q8QZT1	3	14.15
Alpha-2-antiplasmin	Q61247	3	7.943
CD44 antigen	P15379	5	5.141
Integrin alpha-1	Q3V3R4	3	8.312
H-2 class I histocompatibility antigen, K-B alpha chain	P01901	7	33.33
Proteasome subunit alpha type-2	P49722	4	29.91
ADP/ATP translocase 2	P51881	12	53.02
26S proteasome non-ATPase regulatory subunit 9	Q9CR00	3	20.27
Alpha-synuclein	O55042	3	49.29
Ribonuclease T2-B	C0HKG6	3	22.01
ADP-ribosyl cyclase/cyclic ADP-ribose hydrolase 1	P56528	3	15.46
40S ribosomal protein S12	P63323	4	38.64
ATP synthase F(0) complex subunit B1, mitochondrial	Q9CQQ7	4	21.48
Pyridoxal kinase	Q8K183	3	17.95
39S ribosomal protein L12, mitochondrial	Q9DB15	2	28.36
Acylcarnitine hydrolase	Q91WG0	4	14.08
Protein S100-A8	P27005	18	62.92
SH3 domain-binding glutamic acid-rich-like protein 3	Q91VW3	2	47.31
Plasma protease C1 inhibitor	P97290	4	10.32
Serine/threonine-protein phosphatase 2B catalytic subunit alpha isoform	P63328	2	11.32
Delta(3,5)-Delta(2,4)-dienoyl-CoA isomerase, mitochondrial	O35459	3	19.57
ATP synthase protein 8	P03930	2	43.28
Nucleoprotein TPR	F6ZDS4	3	4.36
Proliferation marker protein Ki-67	E9PVX6	3	5.414
D-3-phosphoglycerate dehydrogenase	Q61753	3	13.32
40S ribosomal protein S3a	P97351	3	16.29
Adenosine deaminase	P03958	3	14.49
Actin-related protein 2/3 complex subunit 5-like protein	Q9D898	2	33.33
Chloride intracellular channel protein 1	Q9Z1Q5	3	27.39
Sodium/potassium-transporting ATPase subunit beta-1	P14094	3	29.61
Fibrinogen beta chain	Q8K0E8	2	6.653
Cytochrome c oxidase subunit NDUFA4	Q62425	3	58.54
PDZ and LIM domain protein 5	Q8CI51	3	17.77
Epidermal growth factor receptor	Q01279	3	4.793
N-acetylglucosamine-6-sulfatase	Q8BFR4	2	17.28
Gamma-sarcoglycan	P82348	3	17.18
GTP-binding protein SAR1b	Q9CQC9	3	29.29
COP9 signalosome complex subunit 3	O88543	2	18.68
Complement factor D	P03953	2	25.48
NPC intracellular cholesterol transporter 2	Q9Z0J0	2	47.65
Proteasome subunit alpha type-4	Q9R1P0	3	44.06
Ras suppressor protein 1	Q15404	2	17.33
RNA-binding motif protein, X chromosome	Q9WV02	3	14.32
60S ribosomal protein L11	Q9CXW4	2	16.85
Bisphosphoglycerate mutase	P15327	3	30.5
Transmembrane protein 109	Q3UBX0	2	14.81
V-type proton ATPase catalytic subunit A	P50516	2	17.34
Plasminogen activator inhibitor 1 RNA-binding protein	Q9CY58	2	16.71
Lymphocyte antigen 6C2	P0CW03	4	44.27
NADH dehydrogenase [ubiquinone] 1 alpha subcomplex subunit 11	Q9D8B4	4	35.46
Sodium/potassium-transporting ATPase subunit beta-3	P97370	2	16.91
Platelet glycoprotein Ib beta chain	P56400	2	16.5
Radixin	P26043	3	10.98
Hemoglobin subunit alpha	B3EWD5	92	78.72
Cytochrome c oxidase subunit 2	Q38S50	2	14.98
F-actin-capping protein subunit alpha-1	P47753	3	22.03
3-ketoacyl-CoA thiolase A, peroxisomal	Q921H8	2	12.26
Pro-interleukin-16	O54824	2	4.085
T-complex protein 1 subunit gamma	P80318	2	6.055
Prefoldin subunit 2	O70591	2	23.38
Voltage-dependent anion-selective channel protein 3	Q60931	3	18.02
Acylpyruvase FAHD1, mitochondrial	Q8R0F8	2	22.91
Cathepsin E	P70269	2	7.557
Ig gamma-2B chain C region	P01867	2	8.168
H-2 class II histocompatibility antigen gamma chain	P04441	2	17.92
NADH dehydrogenase [ubiquinone] iron-sulfur protein 6, mitochondrial	P52503	3	52.59
Fibrinogen gamma chain	Q8VCM7	2	10.32
Protein transport protein Sec31A	Q3UPL0	2	3.902
Eosinophil cationic protein 2	P97425	6	49.36
CD48 antigen	P18181	3	17.08
Omega-amidase NIT2	Q9JHW2	2	10.87
Adenylyl cyclase-associated protein 2	Q9CYT6	3	11.55
GrpE protein homolog 1, mitochondrial	Q99LP6	2	16.13
Proline-rich protein 33	Q8C494	2	22.69
DAZ-associated protein 1	Q9JII5	2	11.58
Glutamine amidotransferase-like class 1 domain-containing protein 1	Q8BFQ8	2	24.55
Synaptophysin-like protein 2	O89104	2	20.83
Pyruvate dehydrogenase E1 component subunit alpha, somatic form, mitochondrial	P35486	2	8.462
Platelet glycoprotein V	O08742	2	5.644
Eukaryotic translation initiation factor 3 subunit F	Q9DCH4	2	7.202
Phospholipid phosphatase 3	Q99JY8	2	7.051
Platelet-activating factor acetylhydrolase IB subunit alpha2	Q61206	2	12.23
Atypical kinase COQ8A, mitochondrial	Q60936	2	6.202
Apoptosis regulator BAX	Q07813	2	11.98
Peptidyl-prolyl cis-trans isomerase FKBP2	P45878	2	19.29
CD81 antigen	P35762	2	19.07
Ig gamma-1 chain C region, membrane-bound form	P01869	2	5.598
Ig kappa chain V-II region 26-10	P01631	2	17.7
Vesicle-associated membrane protein 2	P63044	3	20.69
Cysteine-rich protein 2	Q9DCT8	5	32.21
NADH dehydrogenase [ubiquinone] 1 beta subcomplex subunit 5, mitochondrial	Q9CQH3	2	7.937
Integrin alpha-2	Q62469	2	5.008
Equilibrative nucleoside transporter 1	Q9JIM1	3	8.043
Ubiquitin-conjugating enzyme E2 K	P61087	2	18.5
NADH dehydrogenase [ubiquinone] 1 subunit C2	Q9CQ54	2	24.17
Macrosialin	P31996	2	8.282
Heme-binding protein 1	Q9R257	2	16.32
Cystatin-C	P21460	2	17.14
Histone H1.0	P10922	2	13.92
Low affinity immunoglobulin gamma Fc region receptor III	P08508	2	8.046
Tripeptidyl-peptidase 1	O89023	3	10.68
High mobility group protein B1	P63158	3	24.65
Myozenin-3	Q8R4E4	2	25.31
Carboxypeptidase Q	Q9WVJ3	2	7.234
Gamma-parvin	Q9ERD8	2	11.18
OX-2 membrane glycoprotein	O54901	2	10.07
Angiotensin-converting enzyme	P09470	2	5.488
Heat shock 70 kDa protein 4	Q61316	3	9.988
Calcium-binding mitochondrial carrier protein Aralar1	Q8BH59	2	14.33
40S ribosomal protein S13	P62301	2	29.14
Actin-related protein 2/3 complex subunit 2	Q9CVB6	3	18.67
Eukaryotic translation initiation factor 6	O55135	2	17.14
NADH dehydrogenase [ubiquinone] 1 alpha subcomplex subunit 13	Q9ERS2	3	29.86
Syntaxin-7	O70439	4	29.5
OCIA domain-containing protein 1	Q9CRD0	3	24.29
Actin-related protein 2	P61161	2	11.42
Immunoglobulin superfamily containing leucine-rich repeat protein	Q6GU68	2	8.411
Hydroxyacylglutathione hydrolase, mitochondrial	Q99KB8	3	11.65
T-complex protein 1 subunit theta	P42932	2	6.204
Histone H2A.V	Q3THW5	9	33.59
CCR4-NOT transcription complex subunit 9	Q9JKY0	2	18.06
Protein ERGIC-53	Q9D0F3	2	14.12
Copine-3	Q8BT60	3	6.379
Isoaspartyl peptidase/L-asparaginase	Q8C0M9	2	14.72
UV excision repair protein RAD23 homolog B	P54728	3	13.7
Matrix extracellular phosphoglycoprotein	Q8K4L6	2	15.19
Complement component receptor 1-like protein	Q64735	3	7.66
Heterogeneous nuclear ribonucleoprotein D0	Q60668	3	18.59
Histidine-rich glycoprotein	Q9ESB3	2	10.1
Peflin	Q8BFY6	2	13.82
SUN domain-containing protein 2	Q8BJS4	2	6.703
Cartilage oligomeric matrix protein	Q9R0G6	3	12.72
60S ribosomal protein L30	P62889	2	24.35
Sodium/potassium-transporting ATPase subunit alpha-2	Q6PIE5	2	11.27
Tartrate-resistant acid phosphatase type 5	Q05117	2	12.23
Immunoglobulin kappa constant	P01834	2	60.75
Protein S100-A10	P08207	3	34.02
Sarcospan	Q62147	2	8.796
Inter alpha-trypsin inhibitor, heavy chain 4	A6X935	2	8.917
Keratin, type I cytoskeletal 19	P19001	3	8.685
V-type proton ATPase subunit E 1	P50518	3	14.6
Tubulin alpha-4A chain	P68368	13	34.6
Torsin-1A-interacting protein 1	Q921T2	3	6.387
Adipocyte plasma membrane-associated protein	Q9D7N9	2	12.05
CD9 antigen	P40240	5	26.55
MYG1 exonuclease	Q9JK81	2	5.263
Phospholipase A2 group XV	Q8VEB4	2	14.32
Protein S100-A4	P07091	2	22.77
Integrin alpha-5	P11688	2	5.888
Glycogenin-1	Q9R062	2	11.11
Hydroxymethylglutaryl-CoA lyase, mitochondrial	P38060	2	16.92
Alcohol dehydrogenase 1	P00329	2	10.93
CD63 antigen	P41731	3	15.13
Metalloreductase STEAP3	Q8CI59	2	11.48
Y-box-binding protein 3	Q9JKB3	4	19.67
Heat shock protein HSP 90-beta	P11499	4	9.807
H-2 class II histocompatibility antigen, A-U alpha chain (Fragment)	P14438	2	15.42
Retinol-binding protein 4	Q00724	2	9.95
Glycophorin-A	P14220	2	19.05
Alpha-1-acid glycoprotein 1	Q60590	2	22.22
Glycophorin-C	Q78HU7	2	28.42
Ras-related protein Rab-5B	P61021	4	34.42
Macrophage-capping protein	P24452	6	16.76
Transmembrane emp24 domain-containing protein 4	Q8R1V4	2	23.79
ELAV-like protein 1	Q15717	2	7.362
Syntaxin-12	Q9ER00	2	22.63
Serine-threonine kinase receptor-associated protein	Q9Z1Z2	3	11.14
FUN14 domain-containing protein 2	Q9D6K8	3	22.52
Secretory carrier-associated membrane protein 2	Q9ERN0	2	12.16
Gamma-glutamyl hydrolase	Q9Z0L8	2	17.67
V-type proton ATPase subunit B, brain isoform	P62814	2	5.088
ATP-dependent 6-phosphofructokinase, muscle type	P47857	1	11.28
Heat shock protein beta-7	P35385	4	26.04
Prohibitin-2	O35129	2	12.71
Chitinase-3-like protein 1	Q61362	3	16.2
Glutaredoxin-1	Q9QUH0	2	23.36
Translin-associated protein X	Q9QZE7	3	18.62
Tetraspanin-14	Q8QZY6	2	10
Endothelial cell-selective adhesion molecule	Q925F2	2	10.41
Haloacid dehalogenase-like hydrolase domain-containing protein 2	Q3UGR5	2	16.6
Proteasome subunit alpha type-3	O70435	2	19.22
Receptor expression-enhancing protein 5	Q60870	2	18.38
Golgi apparatus protein 1	Q61543	2	7.489
Voltage-dependent calcium channel gamma-6 subunit	Q8VHW3	2	17.31
Keratin, type II cytoskeletal 2 epidermal	Q3TTY5	3	8.062
Ribosyldihydronicotinamide dehydrogenase [quinone]	Q9JI75	1	38.53
Mesencephalic astrocyte-derived neurotrophic factor	Q9CXI5	2	9.497
Ras-related protein Rab-1B	Q9D1G1	7	53.23
Ragulator complex protein LAMTOR1	Q9CQ22	2	16.15
Hexokinase-3	Q3TRM8	2	4.121
Proteasome subunit beta type-3	Q9R1P1	2	20
Tropomodulin-3	Q9NYL9	2	9.375
Programmed cell death protein 10	Q8VE70	1	20.28
Proteasome subunit beta type-1	O09061	4	38.33
Nuclear mitotic apparatus protein 1	E9Q7G0	1	6.017
Cytochrome c oxidase subunit 5B, mitochondrial	P19536	2	66.41
14-3-3 protein gamma	P61982	5	26.72
Alpha-hemoglobin-stabilizing protein	Q9CY02	4	55.88
Histone H3.2	Q71DI3	2	28.68
Lysosomal acid phosphatase	P24638	2	6.383
N(G),N(G)-dimethylarginine dimethylaminohydrolase 2	Q99LD8	1	16.84
Glutathione hydrolase 5 proenzyme	Q9Z2A9	2	8.202
Laminin subunit beta-1	P02469	2	4.983
LIM and senescent cell antigen-like-containing domain protein 1	Q99JW4	1	15.69
ATP synthase membrane subunit K, mitochondrial	Q78IK2	2	43.1
NADH dehydrogenase [ubiquinone] iron-sulfur protein 4, mitochondrial	Q9CXZ1	2	19.43
S-formylglutathione hydrolase	Q9R0P3	2	16.67
Vesicle-associated membrane protein 8	O70404	2	23.76
Neural cell adhesion molecule 1	P13595	1	7.713
Ras-related protein Rap-1A	P62835	11	73.37
Proteasome subunit beta type-2	Q9R1P3	1	12.94
Histone H2A type 1-K	Q8CGP7	34	43.08
Protein-L-isoaspartate(D-aspartate) O-methyltransferase	P23506	2	15.42
GMP reductase 1	Q9DCZ1	1	16.52
Small glutamine-rich tetratricopeptide repeat-containing protein alpha	Q8BJU0	1	23.17
Cytochrome b-245 light chain	Q61462	1	28.13
Acyl-protein thioesterase 1	P97823	1	16.09
Platelet factor 4	Q9Z126	2	28.57
NADH dehydrogenase [ubiquinone] 1 beta subcomplex subunit 6	Q3UIU2	2	10.94
Peptidyl-prolyl cis-trans isomerase FKBP4	P30416	2	12.66
Sarcolemmal membrane-associated protein	Q3URD3	1	2.604
40S ribosomal protein S2	P25444	2	15.7
Collectin-12	Q8K4Q8	4	8.356
Protein NDRG1	Q62433	1	7.614
Basal cell adhesion molecule	Q9R069	1	10.45
Putative phospholipase B-like 2	Q3TCN2	1	4.209
Ectonucleoside triphosphate diphosphohydrolase 2	O55026	3	5.051
Alanine aminotransferase 1	Q8QZR5	1	6.452
Muscleblind-like protein 1	Q9JKP5	1	9.677
NADH dehydrogenase [ubiquinone] 1 alpha subcomplex subunit 2	Q9CQ75	1	51.52
IST1 homolog	Q9CX00	1	9.945
Complement C4-B	P01029	1	3.682
Tubulin beta-4B chain	P68372	7	43.37
60S acidic ribosomal protein P0	P14869	3	13.88
Eukaryotic translation initiation factor 5A-1	P63242	3	35.71
Mast cell-expressed membrane protein 1	Q9D8U6	2	36.07
40S ribosomal protein S20	P60867	1	15.97
Proteasome subunit beta type-9	P28076	1	18.26
L-selectin	P18337	1	7.527
Hepatocyte growth factor-regulated tyrosine kinase substrate	Q99LI8	1	2.581
Ubiquitin-like protein ISG15	Q64339	1	16.77
Clathrin light chain A	O08585	4	29.36
Neutral amino acid transporter B(0)	P51912	2	11.39
Ras-related protein Rab-2A	P53994	1	12.74
Alpha-aminoadipic semialdehyde dehydrogenase	Q64057	2	5.937
Aldo-keto reductase family 1 member B1	P45376	1	9.81
Protein phosphatase 1 regulatory subunit 3A	Q99MR9	1	6.979
Epidermal growth factor receptor substrate 15-like 1	Q60902	1	4.41
Importin subunit beta-1	P70168	2	3.082
Splicing factor, proline- and glutamine-rich	Q8VIJ6	1	5.15
Serine/threonine-protein phosphatase 2A activator	P58389	1	10.22
Cytoplasmic dynein 1 heavy chain 1	Q9JHU4	1	0.9044
Coiled-coil-helix-coiled-coil-helix domain-containing protein 2	Q9D1L0	1	22.22
NHL repeat-containing protein 3	Q8CCH2	1	7.493
Hemoglobin subunit alpha	B3EWD3	84	71.63
Ras-related protein Rab-10	P61027	3	23
B-cell receptor-associated protein 31	Q61335	2	17.96
Calcium/calmodulin-dependent protein kinase type II subunit alpha	P11798	1	5.858
Nuclear transcription factor Y subunit gamma	P70353	1	5.97
Myotilin	Q9JIF9	1	5.444
Proteolipid protein 2	Q9R1Q7	1	23.03
Alpha-1-antitrypsin 1-2	P22599	55	46.25
CapZ-interacting protein	Q3UZA1	1	11.17
Trem-like transcript 1 protein	Q8K558	1	8.517
Cartilage intermediate layer protein 1	Q66K08	1	1.943
Calsequestrin-1	O09165	1	7.407
Keratin, type II cytoskeletal 6B	Q9Z331	4	11.57
Beta-mannosidase	Q8K2I4	3	3.641
40S ribosomal protein S16	P14131	1	19.86
Myosin light chain 6B	Q8CI43	1	17.39
Synaptopodin 2-like protein	Q8BWB1	1	3.897
40S ribosomal protein S4	P47836	1	13.69
Target of Myb protein 1	O88746	1	4.878
Protein transport protein Sec61 subunit beta	Q9CQS8	1	40.63
Mitochondrial import inner membrane translocase subunit Tim13	P62075	1	26.32
Collagen triple helix repeat-containing protein 1	Q9D1D6	1	6.531
Bis(5'-adenosyl)-triphosphatase enpp4	Q8BTJ4	1	4.825
Junctional sarcoplasmic reticulum protein 1	Q3MI48	1	12.95
Carboxylesterase 1D	Q8VCT4	4	10.27
MICOS complex subunit Mic27	Q78IK4	2	12.08
Glucose-6-phosphate 1-dehydrogenase X	Q00612	1	10.1
Oxygen-regulated protein 1	P56716	1	1.384
Hydroxyacyl-coenzyme A dehydrogenase, mitochondrial	Q61425	1	14.65
Protein PLASTID MOVEMENT IMPAIRED 1	Q9C8E6	1	1.779
KH domain-containing, RNA-binding, signal transduction-associated protein 1	Q60749	1	4.515
ERO1-like protein alpha	Q8R180	1	8.621
Peptidyl-prolyl cis-trans isomerase B	P24369	1	13.43
Prostaglandin F2 receptor negative regulator	Q9WV91	1	2.275
Glycosylated lysosomal membrane protein	Q9JHJ3	1	6.436
Microfibril-associated glycoprotein 4	Q9D1H9	1	9.728
Cytochrome b-c1 complex subunit 8	Q9CQ69	1	25.61
Choline transporter-like protein 1	Q6X893	1	3.828
RNA-binding protein EWS	Q61545	1	2.29
Peptidyl-prolyl cis-trans isomerase FKBP1A	P26883	1	25
Isoform 6 of LIM domain-binding protein 3	Q9JKS4-6	38	85.07
Histone H1.3	P43277	22	36.2
Histone H1.2	P16403	21	32.86
Isoform B of Reticulon-4	Q99P72-5	9	36.52
Isoform 2 of Leukocyte surface antigen CD47	Q61735-2	5	20.06
Major urinary protein 2	P11589	4	61.11
Keratin, type II cytoskeletal 79	Q8VED5	3	9.981
Integrin beta-5	O70309	2	3.258
40S ribosomal protein S5-1	Q9ZUT9	2	11.11
Guanine nucleotide-binding protein G(o) subunit alpha	P18872	1	8.192
C-type lectin domain family 10 member A	P49300	3	10.2
Small muscular protein	Q9DC77	2	29.41
N(4)-(beta-N-acetylglucosaminyl)-L-asparaginase	Q64191	1	13.01
Rab GDP dissociation inhibitor beta	Q61598	1	6.742
Myotrophin	P62774	1	27.12
Deoxyribonuclease-2-alpha	P56542	2	5.382
Methylthioribulose-1-phosphate dehydratase	Q9WVQ5	1	3.32
Prefoldin subunit 5	Q9WU28	1	9.74
Fetuin-B	Q9QXC1	1	2.32
BUB3-interacting and GLEBS motif-containing protein ZNF207	Q9JMD0	1	2.626
ADP-ribosylation factor-like protein 6-interacting protein 1	Q9JKW0	1	4.926
C-type lectin domain family 3 member A	Q9EPW4	1	4.592
OCIA domain-containing protein 2	Q9D8W7	1	8.442
Peptidyl-prolyl cis-trans isomerase FKBP11	Q9D1M7	1	4.975
SAP domain-containing ribonucleoprotein	Q9D1J3	1	4.762
Vesicle transport protein GOT1B	Q9CR60	1	10.14
Protein CutA	Q9CQ89	1	7.91
Microsomal glutathione S-transferase 3	Q9CPU4	1	8.497
Protein disulfide-isomerase A6	Q922R8	1	3.182
ADP-ribose glycohydrolase MACROD1	Q922B1	1	7.121
CDGSH iron-sulfur domain-containing protein 1	Q91WS0	1	13.89
Protein FAM3C	Q91VU0	1	7.048
F-box/LRR-repeat protein 17	Q8W104	1	1.686
CD99 antigen	Q8VCN6	1	35.43
Cell adhesion molecule 1	Q8R5M8	1	2.851
Fucose mutarotase	Q8R2K1	1	7.843
Adhesion G protein-coupled receptor G3	Q8R0T6	1	2.768
LYR motif-containing protein 4	Q8K215	1	15.38
WAS/WASL-interacting protein family member 1	Q8K1I7	1	3.245
Secretory carrier-associated membrane protein 1	Q8K021	1	6.805
Aldehyde dehydrogenase family 16 member A1	Q571I9	1	1.496
Fibulin-1	Q08879	1	1.702
60S acidic ribosomal protein P2	P99027	1	10.43
ATP synthase-coupling factor 6, mitochondrial	P97450	1	12.96
Alpha-sarcoglycan	P82350	1	3.101
Serine/threonine-protein kinase N1	P70268	1	1.057
60S ribosomal protein L8	P62918	1	4.28
40S ribosomal protein S28	P62858	1	17.39
Bcl-2-like protein 13	P59017	1	2.535
Cytochrome c oxidase subunit 7A1, mitochondrial	P56392	1	16.25
ATP synthase subunit f, mitochondrial	P56135	1	13.64
Cytochrome c oxidase subunit 7A2, mitochondrial	P48771	1	12.05
Lymphocyte antigen 6G	P35461	1	18.66
Apolipoprotein C-III	P33622	1	19.19
Polyadenylate-binding protein 1	P29341	1	2.516
Osteopontin	P10923	1	4.422
Receptor-type tyrosine-protein phosphatase C	P06800	1	0.8507
Ig alpha chain C region	P01878	1	4.36
Cytochrome c oxidase subunit 1	P00397	1	2.724
Junctional adhesion molecule A	O88792	1	5
Voltage-dependent calcium channel gamma-1 subunit	O70578	1	7.623
Synaptogyrin-2	O55101	1	4.464
60S ribosomal protein L21	O09167	1	9.375
Synaptosomal-associated protein 23	O09044	1	6.667
Copper transport protein ATOX1	O08997	1	20.59
3-hydroxyacyl-CoA dehydrogenase type-2	O08756	1	4.598
Protein STRUBBELIG-RECEPTOR FAMILY 4	Q6R2K2	1	1.019
40S ribosomal protein S7	P62082	2	17.53
Ras-related protein Rab-5A	Q9CQD1	3	37.67
Annexin A11	P97384	2	14.31
Proteasome subunit beta type-8	P28063	2	10.14
Pyridoxal phosphate homeostasis protein	O94903	1	13.09
Ubiquilin-1	Q8R317	4	11.17
Ras-related protein Rab-27A	Q9ERI2	2	5.882
Cell surface glycoprotein MUC18	Q8R2Y2	2	11.57
Valine--tRNA ligase	Q9Z1Q9	1	1.504
Isochorismatase domain-containing protein 2A	P85094	1	17.48
Carboxypeptidase N subunit 2	Q9DBB9	1	2.559
60S ribosomal protein L17	Q9CPR4	1	8.696
CD82 antigen	P40237	1	4.511
NPC intracellular cholesterol transporter 1	O35604	1	0.9397
Hemogen	Q9ERZ0	1	10.54
Mitochondrial import receptor subunit TOM34	Q9CYG7	2	17.48
Proteasome subunit beta type-6	Q60692	1	16.39
Alpha-1-antiproteinase	P26595	15	18.45
Coronin-1A	O89053	2	6.074
Isopentenyl-diphosphate Delta-isomerase 1	P58044	1	3.965
Leucine-rich repeat-containing protein 25	Q8K1T1	2	10.44
Apoptosis-inducing factor 1, mitochondrial	Q9Z0X1	1	11.6
Pyruvate kinase PKM	P52480	18	47.08
Proteasome subunit alpha type-1	Q9R1P4	2	36.5
Integrin alpha-4	Q00651	1	3.272
Hemoglobin subunit beta	B3EWD4	45	63.7
Telethonin	O70548	1	11.38
Spectrin beta chain, erythrocytic	P15508	1	3.853
Rho-related GTP-binding protein RhoG	P84096	2	11.52
Heme oxygenase 2	O70252	1	9.524
Grancalcin	Q8VC88	2	13.18
Protein dpy-30 homolog	Q99LT0	1	11.11
Beta-adrenergic receptor kinase 2	Q3UYH7	1	2.326
AH receptor-interacting protein	O08915	1	4.242
60S acidic ribosomal protein P1	P47955	1	14.04
Jupiter microtubule associated homolog 2	Q6PGH2	2	18.95
Calcium-transporting ATPase 3, endoplasmic reticulum-type	Q9SY55	1	3.307
Threonine--tRNA ligase 2, cytoplasmic	Q8BLY2	1	1.772
Aminoacylase-1	Q99JW2	1	6.127
Dihydropyrimidinase-related protein 3	Q62188	1	9.474
T-complex protein 1 subunit alpha	P28480	2	10.79
Glutamyl aminopeptidase	P16406	1	2.328
Sodium/potassium-transporting ATPase subunit beta-2	P14231	1	12.76
Complement factor I	Q61129	1	5.638
Trifunctional enzyme subunit beta, mitochondrial	Q99JY0	2	9.263
ATP synthase subunit g, mitochondrial	Q9CPQ8	1	27.18
U6 snRNA-associated Sm-like protein LSm8	Q6ZWM4	1	26.04
Leucine-rich repeat-containing protein 20	Q8CI70	2	23.37
NAD(P)H-hydrate epimerase	Q8K4Z3	1	10.64
Platelet glycoprotein IX	O88186	1	9.605
Actin, aortic smooth muscle	P62737	216	79.84
U2 small nuclear ribonucleoprotein B''	Q9CQI7	3	16
RNA-binding protein 39	Q8VH51	1	4.34
RNA-binding protein FUS	P56959	2	6.371
Hexokinase-1	Q42525	1	1.613
U6 snRNA-associated Sm-like protein LSm1	Q8VC85	1	16.54
Platelet-activating factor acetylhydrolase IB subunit alpha1	Q61205	1	17.67
28S ribosomal protein S23, mitochondrial	Q8VE22	1	5.65
Prenylated Rab acceptor protein 1	Q9Z0S9	1	7.568
Guanine nucleotide-binding protein G(I)/G(S)/G(T) subunit beta-2	P62880	2	7.647
5'-nucleotidase	Q61503	1	10.07
C-1-tetrahydrofolate synthase, cytoplasmic	Q922D8	1	3.316
Methylcrotonoyl-CoA carboxylase beta chain, mitochondrial	Q3ULD5	1	4.973
Eukaryotic initiation factor 4A-I	P60843	1	11.08
Arylsulfatase A	P50428	2	6.917
Transforming growth factor beta-1 proprotein	P04202	1	7.949
Paralemmin-1	Q9Z0P4	1	6.005
Probable aminopeptidase NPEPL1	Q6NSR8	2	11.45
Inorganic pyrophosphatase 2, mitochondrial	Q91VM9	1	3.939
Minor histocompatibility antigen H13	Q8TCT9	2	9.284
Coagulation factor V	P12259	1	1.933
Laminin subunit alpha-4	P97927	2	3.91
LIM and cysteine-rich domains protein 1	Q8VEE1	1	7.397
Small ubiquitin-related modifier 3	Q9Z172	1	10.91
V-type proton ATPase subunit D	P57746	1	4.858
Osteoclast-stimulating factor 1	Q62422	1	15.35
NADH dehydrogenase [ubiquinone] iron-sulfur protein 7, mitochondrial	Q9DC70	1	7.143
Elongation factor 1-alpha 2	Q05639	12	37.58
Myosin light polypeptide 6	Q60605	9	24.5
Band 4.1-like protein 2	O70318	1	2.935
Apolipoprotein B receptor	Q8VBT6	1	1.486
Sepiapterin reductase	Q64105	1	5.747
Adenylosuccinate synthetase isozyme 1	P28650	1	3.063
Synaptopodin	Q8CC35	1	4.198
Ig gamma-2A chain C region secreted form	P01864	1	7.164
Resistin-like gamma	Q8K426	1	15.38
Cystatin-B	Q62426	1	32.65
Ig heavy chain V region MOPC 47A	P01786	1	7.692
N-acetylneuraminate lyase	Q9DCJ9	1	15.63
Thiosulfate sulfurtransferase	P52196	1	3.03
NADP-dependent malic enzyme	P06801	1	6.643
Dolichyl-diphosphooligosaccharide--protein glycosyltransferase subunit 2	Q9DBG6	1	5.547
C-type mannose receptor 2	Q64449	1	2.772
Glutaredoxin-related protein 5, mitochondrial	Q80Y14	1	9.211
Hematopoietic progenitor cell antigen CD34	Q64314	1	7.33
Xin actin-binding repeat-containing protein 1	O70373	1	2.037
Lysosomal acid glucosylceramidase	P17439	1	5.049
Lysosomal protective protein	P16675	2	5.907
Brassinosteroid-related acyltransferase 1	Q9SZ58	1	2.62
26S proteasome non-ATPase regulatory subunit 2	Q8VDM4	2	3.414
T-complex protein 1 subunit zeta	P80317	1	8.663
Receptor protein kinase-like protein ZAR1	Q9ZU46	1	3.352
Protein FAM162A	Q9D6U8	1	20.65
Abl interactor 1	Q8IZP0	1	6.299
60S ribosomal protein L10a	P53026	2	14.75
Hematopoietic lineage cell-specific protein	P49710	1	6.79
Cleavage stimulation factor subunit 2	Q8BIQ5	1	4.655
Dynactin subunit 3	Q9Z0Y1	1	14.52
Glucose-6-phosphate exchanger SLC37A2	Q9WU81	1	2.196
Calpain-8	Q91VA3	1	1.422
Leucyl-cystinyl aminopeptidase	Q8C129	1	9.659
Leucine-rich repeat-containing protein 45	Q8CIM1	1	2.388
Calcium-binding protein 7	Q91ZM8	1	3.721
IgG receptor FcRn large subunit p51	Q61559	1	13.15
Inhibitor of carbonic anhydrase	Q9DBD0	3	4.714
Vasodilator-stimulated phosphoprotein	P70460	1	8
Hemoglobin subunit beta-H1	P04444	2	32.65
Proteasome subunit beta type-5	O55234	2	12.88
Isoleucine--tRNA ligase, mitochondrial	Q8BIJ6	1	3.36
T-complex protein 1 subunit epsilon	P80316	1	2.957
Vacuolar protein sorting-associated protein 29	Q9QZ88	1	5.495
NADH dehydrogenase [ubiquinone] 1 alpha subcomplex subunit 7	Q9Z1P6	1	36.28
C-type lectin domain family 7 member A	Q6QLQ4	1	4.098
Pre-mRNA-splicing factor SPF27	Q9D287	1	5.778
Peroxisome biogenesis protein 2	Q9CA86	1	5.105
Immunoglobulin lambda constant 3	P0DOY3	1	9.434
Dipeptidyl peptidase 1	P97821	2	4.762
Prostaglandin G/H synthase 2	Q05769	1	1.49
Ras-related protein Rab-8B	P61028	3	24.64
Gamma-synuclein	Q9Z0F7	1	13.01
Arachidonate 5-lipoxygenase-activating protein	P30355	1	17.39
Ornithine aminotransferase, mitochondrial	P29758	1	2.506
Sucrose synthase 6	Q9FX32	1	3.079
Ras-related protein Rab-31	Q921E2	1	5.67
Cell cycle control protein 50A	Q8VEK0	2	4.396
Plasmalemma vesicle-associated protein	Q91VC4	1	6.393
Dual specificity protein phosphatase 3	Q9D7X3	1	7.027
CD151 antigen	O35566	1	7.115
Myosin-binding protein H	P70402	1	4.762
Bax inhibitor 1	Q9D2C7	1	3.376
Cadherin EGF LAG seven-pass G-type receptor 1	O35161	1	0.2637
40S ribosomal protein S21	Q9CQR2	1	10.84
Low molecular weight phosphotyrosine protein phosphatase	Q9D358	1	20.25
Leucine-rich repeat flightless-interacting protein 1	Q3UZ39	1	2.881
Ras-related protein Rap-2b	P61226	1	18.03
SUMO-conjugating enzyme UBC9	P63280	1	10.76
High mobility group protein B2	P30681	3	14.76
2-iminobutanoate/2-iminopropanoate deaminase	P52760	2	22.96
Dynein light chain 1, cytoplasmic	P63168	1	20.22
Beta-centractin	Q8R5C5	1	5.851
Isoform 2 of Tropomyosin alpha-3 chain	P21107-2	12	46.37
Transforming protein cbl	P23092	1	9.487
14-3-3 protein eta	P68510	4	26.42
Intercellular adhesion molecule 2	P35330	2	6.498
