# Supplementary material for: Morquio A Syndrome: Identification of Differential Patterns of Molecular Pathway Interactions in Bone Lesions
Source: Int J Mol Sci. 2024 Mar 12;25(6):3232. doi: 10.3390/ijms25063232 (PMC10970612; doi:10.3390/ijms25063232)
Supplement: Supplementary file 1 [file ijms-25-03232-s001.zip › supplementary Table S6.xlsx]

## Sheet: SWATH
Protein name	Uniprot Code	Peptides(95%)	%Cov
Collagen alpha-1(I) chain	P11087	1397	80.94
Myosin-4	Q5SX39	119	59.98
Collagen alpha-2(I) chain	Q01149	990	80.98
Filamin-A	Q8BTM8	86	50.32
Talin-1	P26039	62	43.29
Collagen alpha-1(XII) chain	Q60847	56	31.7
Albumin	P07724	296	84.7
Serotransferrin	Q921I1	87	66.86
Vinculin	Q64727	51	62.66
Pregnancy zone protein	Q61838	46	42.34
Sarcoplasmic/endoplasmic reticulum calcium ATPase 1	Q8R429	73	46.38
Collagen alpha-1(II) chain	P28481	207	64.9
Creatine kinase M-type	P07310	192	92.65
Tropomyosin alpha-1 chain	P58771	46	83.45
Fructose-bisphosphate aldolase A	P05064	91	92.03
Beta-enolase	P21550	82	69.12
Nascent polypeptide-associated complex subunit alpha, muscle-specific form	P70670	35	38.73
Alpha-actinin-3	O88990	38	58.11
Filamin-C	Q8VHX6	43	31.77
Actin, alpha skeletal muscle	P68134	264	80.37
Heat shock cognate 71 kDa protein	P63017	39	59.75
Lactotransferrin	P08071	42	65.63
Glycogen phosphorylase, muscle form	Q9WUB3	31	49.52
Transketolase	P40142	43	56.82
Aspartate aminotransferase, mitochondrial	P05202	40	81.4
ATP synthase subunit alpha, mitochondrial	Q03265	29	59.13
Vimentin	P20152	32	74.25
Myosin-1	Q5SX40	112	57.36
Myosin light chain 1/3, skeletal muscle isoform	P05977	155	93.09
Myeloperoxidase	P11247	29	47.35
Aspartate aminotransferase, cytoplasmic	P05201	31	69.49
Hemopexin	Q91X72	32	58.7
Pyruvate kinase PKM	P52480	29	56.12
Phosphoglucomutase-1	Q9D0F9	32	55.69
Complement C3	P01027	22	25.38
Isoform 4 of LIM domain-binding protein 3	Q9JKS4-4	34	59.16
Titin	A2ASS6	27	3.053
Spectrin alpha chain, non-erythrocytic 1	P16546	21	19.66
Creatine kinase S-type, mitochondrial	Q6P8J7	36	67.54
Alpha-actinin-2	Q9JI91	35	46.31
Collagen alpha-1(III) chain	P08121	80	39.21
Plastin-2	Q61233	24	52.47
Glucose-6-phosphate isomerase	P06745	26	53.05
Prolargin	Q9JK53	38	64.55
Four and a half LIM domains protein 1	P97447	27	74.29
60 kDa heat shock protein, mitochondrial	P63038	22	48.17
Apolipoprotein A-I	Q00623	26	73.11
Isoform 2 of Gelsolin	P13020-2	22	38.99
Murinoglobulin-1	P28665	23	23.98
Myosin regulatory light chain 2, skeletal muscle isoform	P97457	86	95.27
Phosphoglycerate kinase 1	P09411	30	54.2
Fibronectin	P11276	20	19.18
Myoglobin	P04247	71	79.22
Integrin alpha-M	P05555	24	30.1
Triosephosphate isomerase	P17751	51	88.76
Glyceraldehyde-3-phosphate dehydrogenase	P16858	35	66.67
Dihydrolipoyl dehydrogenase, mitochondrial	O08749	26	57.76
Integrin beta-2	P11835	19	39.82
Malate dehydrogenase, mitochondrial	P08249	35	68.93
Hemoglobin subunit alpha	P01942	151	98.59
L-lactate dehydrogenase A chain	P06151	25	63.86
Collagen alpha-2(V) chain	Q3U962	94	44.89
Phosphoglycerate mutase 2	O70250	54	73.12
CD177 antigen	Q8R2S8	22	34.76
Isoform Cytoplasmic of Fumarate hydratase, mitochondrial	P97807-2	24	53.75
WD repeat-containing protein 1	O88342	17	49.34
Collagen alpha-1(XI) chain	Q61245	51	29.38
Aconitate hydratase, mitochondrial	Q99KI0	17	34.49
Parvalbumin alpha	P32848	61	93.64
Decorin	P28654	31	53.11
ATP synthase subunit beta, mitochondrial	P56480	28	65.22
Alpha-1-antitrypsin 1-1	P07758	34	48.18
Myosin-binding protein C, fast-type	Q5XKE0	18	31.34
Cytoskeleton-associated protein 4	Q8BMK4	15	46.26
Chitinase-like protein 3	O35744	28	61.31
Stress-70 protein, mitochondrial	P38647	18	42.71
Lactadherin	P21956	20	49.89
Hemoglobin subunit beta-1	P02088	203	96.6
Actin, cytoplasmic 1	P60710	177	80
Collagen alpha-2(VI) chain	Q02788	17	28.53
Aggrecan core protein	Q61282	17	14.45
Adenylyl cyclase-associated protein 1	P40124	18	57.59
Isocitrate dehydrogenase [NADP], mitochondrial	P54071	16	43.81
Transferrin receptor protein 1	Q62351	15	30.67
Plectin	Q9QXS1	15	10.85
40S ribosomal protein S19	Q9CZX8	16	66.21
Isocitrate dehydrogenase [NAD] subunit alpha, mitochondrial	Q9D6R2	18	40.44
Methanethiol oxidase	P17563	17	56.78
Carboxylesterase 1C	P23953	16	33.75
Lumican	P51885	28	44.67
ATP synthase subunit d, mitochondrial	Q9DCX2	17	83.85
Peroxiredoxin-1	P35700	20	78.89
Alpha-enolase	P17182	35	58.76
Transitional endoplasmic reticulum ATPase	Q01853	16	36.1
Elongation factor 1-alpha 1	P10126	16	43.51
Biglycan	P28653	32	47.7
Very long-chain specific acyl-CoA dehydrogenase, mitochondrial	P50544	14	31.55
2-oxoglutarate dehydrogenase, mitochondrial	Q60597	15	19.26
Succinate dehydrogenase [ubiquinone] flavoprotein subunit, mitochondrial	Q8K2B3	13	26.96
Carbonic anhydrase 3	P16015	17	74.23
Alkaline phosphatase, tissue-nonspecific isozyme	P09242	14	47.14
Elongation factor 2	P58252	14	26.11
Voltage-dependent calcium channel subunit alpha-2/delta-1	O08532	16	21.31
Serine protease inhibitor A3K	P07759	17	36.84
Desmin	P31001	19	47.97
Leukotriene A-4 hydrolase	P24527	16	43.04
Myosin light chain 3	P09542	46	81.86
Alpha-crystallin B chain	P23927	13	73.71
Chondroadherin	O55226	13	38.27
Ribosome-binding protein 1	Q99PL5	12	24.17
Malate dehydrogenase, cytoplasmic	P14152	13	54.19
Collagen alpha-1(VI) chain	Q04857	12	21.56
Transgelin-2	Q9WVA4	16	58.79
Synaptic vesicle membrane protein VAT-1 homolog	Q62465	13	44.58
ADP/ATP translocase 1	P48962	14	46.98
Transaldolase	Q93092	11	38.87
Basement membrane-specific heparan sulfate proteoglycan core protein	Q05793	12	8.417
Apolipoprotein A-IV	P06728	12	59.75
Ferritin heavy chain	P09528	13	74.73
Alpha-2-HS-glycoprotein	P29699	40	49.57
Peptidyl-prolyl cis-trans isomerase A	P17742	12	85.37
Ferritin light chain 1	P29391	25	81.97
BAG family molecular chaperone regulator 3	Q9JLV1	11	29.64
Leukocyte elastase inhibitor A	Q9D154	11	42.22
Voltage-dependent anion-selective channel protein 1	Q60932	12	52.03
Far upstream element-binding protein 2	Q3U0V1	12	23.93
Peroxiredoxin-2	Q61171	19	77.78
Isoform Cytoplasmic of Glutathione reductase, mitochondrial	P47791-2	14	51.27
Myosin-7	Q91Z83	44	28.11
Adenylate kinase isoenzyme 1	Q9R0Y5	17	64.95
Myozenin-1	Q9JK37	10	57.09
Ras-related protein Rab-11B	P46638	10	61.47
Integrin beta-1	P09055	11	19.55
Transcription intermediary factor 1-beta	Q62318	12	17.63
Tenascin-N	Q80Z71	13	28.33
Cytochrome b-c1 complex subunit Rieske, mitochondrial	Q9CR68	11	37.96
Hyaluronan and proteoglycan link protein 1	Q9QUP5	10	43.26
Histone H1.2	P15864	13	37.26
Citrate synthase, mitochondrial	Q9CZU6	14	29.96
Isoform 6 of Collagen alpha-2(XI) chain	Q64739-7	32	26.58
Proteasome activator complex subunit 1	P97371	12	51
Tropomyosin beta chain	P58774	35	72.18
Electron transfer flavoprotein subunit alpha, mitochondrial	Q99LC5	11	56.76
Cytochrome c oxidase subunit 4 isoform 1, mitochondrial	P19783	11	59.17
Cadherin-13	Q9WTR5	10	19.89
Haptoglobin	Q61646	12	37.75
Heat shock protein beta-1	P14602	10	67.94
Histone H2B type 1-P	Q8CGP2	39	70.63
Dihydrolipoyllysine-residue succinyltransferase component of 2-oxoglutarate dehydrogenase complex, mitochondrial	Q9D2G2	11	41.41
Protein S100-A9	P31725	28	60.18
Isoform LMW of Kininogen-1	O08677-2	11	30.09
Keratocan	O35367	10	33.33
Superoxide dismutase [Cu-Zn]	P08228	17	88.96
Superoxide dismutase [Mn], mitochondrial	P09671	15	54.5
Histone H4	P62806	17	67.96
Cofilin-1	P18760	9	60.24
Aminopeptidase N	P97449	11	21.53
Vitamin D-binding protein	P21614	11	22.48
Cytochrome b-c1 complex subunit 2, mitochondrial	Q9DB77	10	35.98
Fatty acid-binding protein, heart	P11404	13	69.92
Dynactin subunit 2	Q99KJ8	9	32.59
Nucleoside diphosphate kinase B	Q01768	12	84.21
Isoform 2 of PDZ and LIM domain protein 7	Q3TJD7-2	10	61.7
Fibromodulin	P50608	21	36.17
Tubulin alpha-1B chain	P05213	10	33.48
Cytochrome b-c1 complex subunit 7	Q9D855	9	72.97
Annexin A1	P10107	9	49.42
40S ribosomal protein SA	P14206	9	60.34
Isoform 2 of Protein NDRG2	Q9QYG0-2	8	52.38
14-3-3 protein zeta/delta	P63101	9	39.18
Cytochrome c, somatic	P62897	12	68.57
NADH dehydrogenase [ubiquinone] 1 alpha subcomplex subunit 8	Q9DCJ5	11	58.72
Peroxiredoxin-5, mitochondrial	P99029	9	37.14
Platelet glycoprotein 4	Q08857	10	31.14
Ras-related protein Rap-1b	Q99JI6	9	65.22
Guanine deaminase	Q9R111	9	31.5
Peroxiredoxin-6	O08709	8	64.73
Histone H2A type 2-A	Q6GSS7	25	46.92
Isocitrate dehydrogenase [NADP] cytoplasmic	O88844	10	30.43
ATP synthase subunit	Q9DB20	9	52.58
Dihydrolipoyllysine-residue acetyltransferase component of pyruvate dehydrogenase complex, mitochondrial	Q8BMF4	9	24.77
Electron transfer flavoprotein subunit beta	Q9DCW4	8	40.39
Serpin H1	P19324	8	35.73
Tripartite motif-containing protein 72	Q1XH17	9	30.61
Annexin A2	P07356	8	46.31
Endoplasmic reticulum chaperone BiP	P20029	9	28.4
Long-chain specific acyl-CoA dehydrogenase, mitochondrial	P51174	10	34.88
Adenosylhomocysteinase	P50247	10	33.8
Glycerol-3-phosphate dehydrogenase [NAD(+)], cytoplasmic	P13707	11	39.54
Reticulon-4	Q99P72	10	7.659
Neutrophil collagenase	O70138	9	22.15
Aldehyde dehydrogenase, mitochondrial	P47738	8	29.09
Apolipoprotein E	P08226	9	42.12
Carbonic anhydrase 1	P13634	9	49.81
Poly(rC)-binding protein 1	P60335	8	29.49
Synaptopodin-2	Q91YE8	8	9.2
Ras GTPase-activating-like protein IQGAP1	Q9JKF1	8	11.41
Carbonic anhydrase 2	P00920	10	56.54
Cathepsin B	P10605	12	38.64
Reticulon-2	O70622	15	19.53
Microtubule-associated protein 4	P27546	8	21.16
Membrane primary amine oxidase	O70423	9	19.08
Myosin regulatory light chain 2, ventricular/cardiac muscle isoform	P51667	12	66.27
Thioredoxin-dependent peroxide reductase, mitochondrial	P20108	13	61.09
Caveolin-1	P49817	8	57.3
NADH dehydrogenase [ubiquinone] 1 beta subcomplex subunit 10	Q9DCS9	8	55.11
3-ketoacyl-CoA thiolase, mitochondrial	Q8BWT1	7	39.8
40S ribosomal protein S10	P63325	6	63.03
Isoform 2 of Basigin	P18572-2	8	39.19
Hypoxanthine-guanine phosphoribosyltransferase	P00493	8	44.95
NADH-ubiquinone oxidoreductase 75 kDa subunit, mitochondrial	Q91VD9	7	19.26
Troponin I, fast skeletal muscle	P13412	9	33.52
Tubulin beta-5 chain	P99024	6	29.95
Beta-galactosidase	P23780	7	18.55
40S ribosomal protein S5	P97461	8	33.82
Succinate dehydrogenase [ubiquinone] iron-sulfur subunit, mitochondrial	Q9CQA3	8	50
Cytochrome c oxidase subunit 6B1	P56391	6	72.09
MIC	Q8CAQ8	8	26.55
Myomesin-1	Q62234	6	10.02
Alpha-1-antitrypsin 1-4	Q00897	33	50.36
2,4-dienoyl-CoA reductase [(3E)-enoyl-CoA-producing], mitochondrial	Q9CQ62	6	39.7
Enoyl-CoA delta isomerase 1, mitochondrial	P42125	7	35.29
Sorcin	Q6P069	9	41.92
H-2 class I histocompatibility antigen, D-B alpha chain	P01899	6	25.41
Stress-induced-phosphoprotein 1	Q60864	7	24.31
CYFIP-related Rac1 interactor B	Q921M7	8	42.28
Cytochrome c oxidase subunit 5A, mitochondrial	P12787	8	48.63
Phosphatidylethanolamine-binding protein 1	P70296	14	86.63
Cytochrome b-c1 complex subunit 1, mitochondrial	Q9CZ13	8	23.54
Neutrophil gelatinase-associated lipocalin	P11672	10	45
Polyubiquitin-C	P0CG50	14	89.1
Transthyretin	P07309	6	70.75
Collagen alpha-1(XV) chain	O35206	6	4.974
Ribose-5-phosphate isomerase	P47968	6	36.63
Sialoadhesin	Q62230	6	13.92
Tubulin polymerization-promoting protein family member 3	Q9CRB6	7	52.84
Cytosol aminopeptidase	Q9CPY7	7	22.35
10 kDa heat shock protein, mitochondrial	Q64433	7	75.49
LIM and SH3 domain protein 1	Q61792	7	33.46
Ras-related protein Rab-7a	P51150	5	60.39
Oxygen-dependent coproporphyrinogen-III oxidase, mitochondrial	P36552	7	20.77
Lysosomal alpha-mannosidase	O09159	6	18.66
Histone H1.5	P43276	9	34.08
Cysteine and glycine-rich protein 1	P97315	6	55.44
Lactoylglutathione lyase	Q9CPU0	6	44.57
Glutathione peroxidase 1	P11352	7	54.73
Dihydropyrimidinase-related protein 2	O08553	7	24.65
Glutamine amidotransferase-like class 1 domain-containing protein 3A, mitochondrial	Q9D172	7	36.47
Cartilage oligomeric matrix protein	Q9R0G6	6	8.212
Long-chain-fatty-acid--CoA ligase 1	P41216	7	16.6
Galectin-1	P16045	6	71.85
Clusterin	Q06890	7	26.34
Phosphoglycerate mutase 1	Q9DBJ1	30	53.94
Serine/threonine-protein phosphatase 2A catalytic subunit alpha isoform	P63330	6	34.95
Neutrophilic granule protein	O08692	7	45.51
Histone H3.2	P84228	9	54.41
Ubiquinone biosynthesis protein COQ9, mitochondrial	Q8K1Z0	6	25.88
Eosinophil cationic protein 1	P97426	9	63.23
Peroxisomal acyl-coenzyme A oxidase 1	Q9R0H0	8	25.87
Four and a half LIM domains protein 3	Q9R059	6	37.37
B-cell receptor-associated protein 31	Q61335	9	26.53
Antithrombin-III	P32261	6	29.68
Glycerol-3-phosphate dehydrogenase, mitochondrial	Q64521	6	13.62
Isoform 3 of Heterogeneous nuclear ribonucleoprotein K	P61979-3	7	35.54
Isoform Alpha-7X2B of Integrin alpha-7	Q61738-5	5	14.01
Ras-related C3 botulinum toxin substrate 2	Q05144	6	36.46
Delta-aminolevulinic acid dehydratase	P10518	5	16.06
NADH dehydrogenase [ubiquinone] flavoprotein 2, mitochondrial	Q9D6J6	6	41.53
Prohibitin	P67778	5	31.99
Leucine-rich repeat-containing protein 59	Q922Q8	5	36.16
ATP synthase subunit gamma, mitochondrial	Q91VR2	6	21.48
PDZ and LIM domain protein 1	O70400	6	40.98
NADH dehydrogenase [ubiquinone] flavoprotein 1, mitochondrial	Q91YT0	7	22.63
Isoform 2 of Myc box-dependent-interacting protein 1	O08539-2	6	36.87
Phosphate carrier protein, mitochondrial	Q8VEM8	5	28.01
Isoform 2 of Sarcalumenin	Q7TQ48-1	5	12.75
Heterogeneous nuclear ribonucleoprotein F	Q9Z2X1	5	21.2
Cytochrome c oxidase subunit NDUFA4	Q62425	8	57.32
Heterogeneous nuclear ribonucleoprotein M	Q9D0E1	6	13.99
Tetranectin	P43025	7	38.61
Inositol monophosphatase 1	O55023	5	27.08
Phospholipase B-like 1	Q8VCI0	5	16
Porphobilinogen deaminase	P22907	5	29.36
Ras-related protein Rab-14	Q91V41	6	36.28
MICOS complex subunit Mic26	Q9DCZ4	5	37.37
L-lactate dehydrogenase B chain	P16125	9	23.95
Keratin, type I cytoskeletal 10	P02535	6	13.86
Myotilin	Q9JIF9	5	15.12
Lysozyme C-2	P08905	7	59.46
Alcohol dehydrogenase class-3	P28474	5	41.98
Laminin subunit alpha-2	Q60675	4	5.484
Sorbitol dehydrogenase	Q64442	5	19.61
Alpha-actinin-1	Q7TPR4	13	22.87
Delta(3,5)-Delta(2,4)-dienoyl-CoA isomerase, mitochondrial	O35459	5	29.66
Periostin	Q62009	4	17.9
Translationally-controlled tumor protein	P63028	11	57.56
Galectin-3	P16110	5	27.27
Far upstream element-binding protein 1	Q91WJ8	6	19.82
Heat shock protein beta-6	Q5EBG6	5	54.94
Peptidyl-prolyl cis-trans isomerase FKBP10	Q61576	6	17.56
60S ribosomal protein L12	P35979	4	54.55
Histone H1.1	P43275	11	42.72
Acid ceramidase	Q9WV54	5	21.57
Cathelicidin antimicrobial peptide	P51437	24	56.98
Nucleobindin-1	Q02819	5	21.35
von Willebrand factor A domain-containing protein 5A	Q99KC8	5	8.701
Integrin alpha-V	P43406	5	13.22
NADH dehydrogenase [ubiquinone] 1 alpha subcomplex subunit 2	Q9CQ75	4	59.6
Integrin beta-3	O54890	7	16.01
Laminin subunit beta-2	Q61292	3	12.23
Voltage-dependent anion-selective channel protein 2	Q60930	5	15.93
6-phosphogluconolactonase	Q9CQ60	4	47.08
Serpin B6	Q60854	6	21.96
MLV-related proviral Env polyprotein	P10404	4	15.29
40S ribosomal protein S25	P62852	4	34.4
PDZ and LIM domain protein 3	O70209	4	27.53
NADH dehydrogenase [ubiquinone] iron-sulfur protein 8, mitochondrial	Q8K3J1	4	25.94
U1 small nuclear ribonucleoprotein A	Q62189	4	22.65
NADH dehydrogenase [ubiquinone] 1 beta subcomplex subunit 8, mitochondrial	Q9D6J5	5	32.26
Acetyl-CoA acetyltransferase, mitochondrial	Q8QZT1	5	23.35
Adhesion G protein-coupled receptor E5	Q9Z0M6	4	12.59
Acylamino-acid-releasing enzyme	Q8R146	6	13.66
Serine/threonine-protein phosphatase 6 catalytic subunit	Q9CQR6	4	33.44
Perilipin-3	Q9DBG5	4	27.23
Ubiquitin-conjugating enzyme E2 N	P61089	4	57.24
Myeloblastin	Q61096	5	27.56
Lysosome-associated membrane glycoprotein 2	P17047	4	10.6
40S ribosomal protein S3	P62908	7	26.75
Lysosome-associated membrane glycoprotein 1	P11438	4	18.97
F-actin-capping protein subunit alpha-2	P47754	4	22.03
Nicastrin	P57716	5	7.768
Troponin T, fast skeletal muscle	Q9QZ47	5	28.68
Gamma-sarcoglycan	P82348	4	19.59
Sorting and assembly machinery component 50 homolog	Q8BGH2	4	16.2
Keratin, type II cytoskeletal 5	Q922U2	5	12.07
Mitochondrial antiviral-signaling protein	Q8VCF0	4	25.65
Cartilage intermediate layer protein 2	D3Z7H8	4	12.56
Receptor of activated protein C kinase 1	P68040	5	23.03
Vesicle-associated membrane protein-associated protein A	Q9WV55	4	26.1
Cation-dependent mannose-6-phosphate receptor	P24668	4	17.99
Thrombospondin-1	P35441	4	7.009
Calmodulin-3	P0DP28	5	41.61
Cysteine and glycine-rich protein 3	P50462	5	58.76
Zyxin	Q62523	5	14.01
Alpha-1-antitrypsin 1-5	Q00898	30	51.09
Matrix metalloproteinase-9	P41245	4	11.23
Ceruloplasmin	Q61147	4	6.692
Ankyrin repeat domain-containing protein 2	Q9WV06	5	26.52
Major urinary protein 1	P11588	5	42.22
Sodium/potassium-transporting ATPase subunit alpha-2	Q6PIE5	5	13.14
Rho GDP-dissociation inhibitor 2	Q61599	5	48.5
Transmembrane protein 109	Q3UBX0	4	18.52
Glycerol-3-phosphate phosphatase	Q8CHP8	4	20.25
Cytochrome c oxidase subunit 2	P00405	4	19.38
ADP-ribosylation factor 5	P84084	4	32.22
Laminin subunit gamma-1	P02468	5	7.405
Nidogen-1	P10493	5	8.353
Myristoylated alanine-rich C-kinase substrate	P26645	4	23.62
Myozenin-2	Q9JJW5	5	26.52
Prothrombin	P19221	4	21.52
Isoform 3 of Reticulon-3	Q9ES97-3	4	34.6
Succinate--CoA ligase [ADP-forming] subunit beta, mitochondrial	Q9Z2I9	4	16.85
UTP--glucose-1-phosphate uridylyltransferase	Q91ZJ5	3	17.72
Troponin C, skeletal muscle	P20801	6	51.25
Medium-chain specific acyl-CoA dehydrogenase, mitochondrial	P45952	5	25.42
Cathepsin S	O70370	4	21.76
Choline transporter-like protein 2	Q8BY89	4	7.932
Ubiquilin-1	Q8R317	4	12.54
Carbamoyl-phosphate synthase [ammonia], mitochondrial	Q8C196	5	8.667
Glutathione S-transferase Mu 1	P10649	4	31.65
Fibrillin-1	Q61554	4	4.177
Prosaposin	Q61207	4	11.31
NADH dehydrogenase [ubiquinone] 1 alpha subcomplex subunit 7	Q9Z1P6	4	63.72
Complement factor D	P03953	4	31.66
SH3 domain-binding glutamic acid-rich-like protein 3	Q91VW3	4	43.01
Fatty acid-binding protein, adipocyte	P04117	4	50
Actin-related protein 2/3 complex subunit 3	Q9JM76	5	23.6
Beta-glucuronidase	P12265	6	22.07
ATP synthase subunit e, mitochondrial	Q06185	3	70.42
Ras-related protein Rab-5C	P35278	4	31.48
Acyl-CoA-binding protein	P31786	4	67.82
4-trimethylaminobutyraldehyde dehydrogenase	Q9JLJ2	4	14.37
Pigment epithelium-derived factor	P97298	6	31.41
Ras-related protein Rab-1A	P62821	6	44.88
Integrin beta-2-like protein	Q3UV74	4	11.52
Beta-2-glycoprotein 1	Q01339	3	17.97
EF-hand domain-containing protein D2	Q9D8Y0	4	22.92
Trifunctional enzyme subunit alpha, mitochondrial	Q8BMS1	3	5.898
Y-box-binding protein 3	Q9JKB3	4	24.38
Perilipin-4	O88492	6	28.3
Annexin A6	P14824	3	13.22
Myelin protein P0	P27573	4	20.97
NADH dehydrogenase [ubiquinone] 1 alpha subcomplex subunit 13	Q9ERS2	4	33.33
Sodium/potassium-transporting ATPase subunit beta-1	P14094	7	34.54
Inter-alpha-trypsin inhibitor heavy chain H1	Q61702	4	11.36
Integrin alpha-IIb	Q9QUM0	3	7.067
Phosphate-regulating neutral endopeptidase PHEX	P70669	3	21.5
Protein S100-A11	P50543	5	43.88
Caspase-3	P70677	4	26.71
Persulfide dioxygenase ETHE1, mitochondrial	Q9DCM0	4	38.19
Pyruvate dehydrogenase E1 component subunit alpha, somatic form, mitochondrial	P35486	3	13.85
ATP synthase F(0) complex subunit B1, mitochondrial	Q9CQQ7	5	26.56
Versican core protein	Q62059	5	2.324
Immunoglobulin heavy constant mu	P01872	3	23.57
SPARC	P07214	3	18.87
Protein S100-A10	P08207	3	38.14
GTP-binding nuclear protein Ran	P62827	3	42.59
Adiponectin	Q60994	3	27.13
Isoform 4 of Heterogeneous nuclear ribonucleoprotein D0	Q60668-4	3	23.34
26S proteasome non-ATPase regulatory subunit 9	Q9CR00	4	16.67
Macrophage migration inhibitory factor	P34884	5	23.48
Aldo-keto reductase family 1 member B1	P45376	4	21.2
Cathepsin D	P18242	4	11.71
Heme oxygenase 1	P14901	6	22.49
CDGSH iron-sulfur domain-containing protein 2	Q9CQB5	3	44.44
Thioredoxin domain-containing protein 5	Q91W90	4	27.82
Sterol carrier protein 2	P32020	3	8.958
NADH dehydrogenase [ubiquinone] iron-sulfur protein 6, mitochondrial	P52503	3	50.86
Large proline-rich protein BAG6	Q9Z1R2	4	7.192
Glutathione S-transferase P 1	P19157	4	37.14
Isoform 2 of F-actin-capping protein subunit beta	P47757-2	3	27.57
40S ribosomal protein S18	P62270	4	31.58
NPC intracellular cholesterol transporter 2	Q9Z0J0	3	38.26
Histone H1.0	P10922	4	25.26
Alcohol dehydrogenase 1	P00329	5	31.2
NADH dehydrogenase [ubiquinone] iron-sulfur protein 3, mitochondrial	Q9DCT2	3	25.48
Apoptosis-inducing factor 1, mitochondrial	Q9Z0X1	4	10.62
Tumor protein D54	Q9CYZ2	4	27.27
Alpha-synuclein	O55042	3	41.43
4F2 cell-surface antigen heavy chain	P10852	3	26.62
Aspartyl aminopeptidase	Q9Z2W0	4	14.38
Endophilin-B1	Q9JK48	4	16.99
Actin-related protein 3	Q99JY9	3	21.77
NADH dehydrogenase [ubiquinone] 1 beta subcomplex subunit 7	Q9CR61	3	44.53
Transmembrane emp24 domain-containing protein 9	Q99KF1	3	27.66
ATP synthase subunit delta, mitochondrial	Q9D3D9	11	46.43
Glutathione S-transferase omega-1	O09131	3	27.08
Synaptophysin-like protein 2	O89104	4	23.11
Neuroplastin	P97300	3	9.32
Myosin-8	P13542	84	43.21
Profilin-1	P62962	3	29.29
Elongin-B	P62869	3	59.32
ATP synthase protein 8	P03930	3	43.28
Proteasome activator complex subunit 2	P97372	3	23.43
Coagulation factor X	O88947	4	14.55
Purine nucleoside phosphorylase	P23492	5	26.99
Myocilin	O70624	3	15.71
Mammalian ependymin-related protein 1	Q99M71	3	23.66
Receptor expression-enhancing protein 5	Q60870	3	19.46
14-3-3 protein gamma	P61982	6	29.55
GTP-binding protein SAR1b	Q9CQC9	3	15.15
ATP synthase-coupling factor 6, mitochondrial	P97450	4	50
Polypyrimidine tract-binding protein 1	P17225	2	12.71
Hydroxyacylglutathione hydrolase, mitochondrial	Q99KB8	3	16.83
Isoaspartyl peptidase/L-asparaginase	Q8C0M9	3	26.69
Thy-1 membrane glycoprotein	P01831	3	25.93
Translin	Q62348	4	26.32
Leukocyte surface antigen CD47	Q61735	4	21.78
Myosin light polypeptide 6	Q60605	16	40.4
Protein NipSnap homolog 3B	Q9CQE1	3	20.65
Troponin I, slow skeletal muscle	Q9WUZ5	4	22.99
Calponin-2	Q08093	4	22.62
Aquaporin-1	Q02013	3	18.96
RNA-binding protein FUS	P56959	3	8.301
Catalase	P24270	3	15.18
Protein FAM162A	Q9D6U8	3	30.32
Sushi domain-containing protein 2	Q9DBX3	3	6.951
NADH dehydrogenase [ubiquinone] 1 subunit C2	Q9CQ54	3	33.33
Heat shock protein HSP 90-beta	P11499	3	4.696
Filamin-B	Q80X90	9	10.3
CD44 antigen	P15379	4	7.584
NADH dehydrogenase [ubiquinone] 1 alpha subcomplex subunit 6	Q9CQZ5	4	31.3
14-3-3 protein epsilon	P62259	5	28.63
Nucleoside diphosphate kinase A	P15532	11	55.26
Selenide, water dikinase 1	Q8BH69	2	11.48
H-2 class II histocompatibility antigen, A beta chain	P14483	3	16.23
Cell division control protein 42 homolog	P60766	5	29.84
Galectin-3-binding protein	Q07797	2	11.09
Glycerophosphoinositol inositolphosphodiesterase GDPD2	Q9ESM6	3	7.236
Mitochondrial fission 1 protein	Q9CQ92	3	24.34
MIC	Q9CRB9	3	20.26
UV excision repair protein RAD23 homolog B	P54728	3	13.22
Parkinson disease protein 7 homolog	Q99LX0	4	43.39
Epidermal growth factor receptor	Q01279	2	4.132
Proliferating cell nuclear antigen	P17918	2	25.29
Protein disulfide-isomerase A3	P27773	2	13.27
Protein S100-A8	P27005	12	70.79
Adenylosuccinate synthetase isozyme 1	P28650	3	11.16
Glutathione hydrolase 5 proenzyme	Q9Z2A9	2	10.99
Cytochrome c oxidase subunit 6C	Q9CPQ1	3	48.68
Tropomyosin alpha-3 chain	P21107	24	73.33
Thioredoxin	P10639	2	45.71
Pro-cathepsin H	P49935	3	9.309
Basal cell adhesion molecule	Q9R069	2	9.807
Mitochondrial import receptor subunit TOM34	Q9CYG7	2	16.5
Lysosome membrane protein 2	O35114	2	14.23
Glutathione peroxidase 3	P46412	3	19.47
Phosphatidylinositol-binding clathrin assembly protein	Q7M6Y3	3	5.909
Calcium-binding mitochondrial carrier protein Aralar1	Q8BH59	3	9.306
Leukosialin	P15702	2	10.13
Dipeptidase 1	P31428	2	14.15
COP9 signalosome complex subunit 3	O88543	3	11.58
Cell surface glycoprotein MUC18	Q8R2Y2	2	7.716
Programmed cell death protein 6	P12815	2	25.13
Acid sphingomyelinase-like phosphodiesterase 3a	P70158	2	11.24
Vitronectin	P29788	2	9.833
Prolow-density lipoprotein receptor-related protein 1	Q91ZX7	4	3.124
Tumor protein D52	Q62393	2	27.68
Alpha-1-antitrypsin 1-2	P22599	33	46.49
Actin-related protein 2/3 complex subunit 5-like protein	Q9D898	2	37.91
Vesicle-associated membrane protein-associated protein B	Q9QY76	2	37.86
Heterogeneous nuclear ribonucleoprotein A/B	Q99020	3	11.93
Ig gamma-1 chain C region, membrane-bound form	P01869	2	11.96
Protein CREG1	O88668	2	18.64
Histone H2A type 1-K	Q8CGP7	25	46.92
Carboxylesterase 1D	Q8VCT4	5	12.92
Keratin, type II cytoskeletal 1b	Q6IFZ6	5	8.566
Histone H2A.V	Q3THW5	9	31.25
GTP:AMP phosphotransferase AK3, mitochondrial	Q9WTP7	2	30.4
CD81 antigen	P35762	2	19.07
Prefoldin subunit 2	O70591	2	16.88
Bone marrow proteoglycan	Q61878	3	8.52
Mimecan	Q62000	4	30.2
Eosinophil cationic protein 2	P97425	5	49.36
Immunoglobulin kappa constant	P01837	2	48.6
Arylsulfatase B	P50429	4	14.98
ATP-dependent (S)-NAD(P)H-hydrate dehydratase	Q9CZ42	3	20.41
Dystroglycan	Q62165	3	13.1
40S ribosomal protein S28	P62858	2	33.33
Proteasome activator complex subunit 3	P61290	2	20.87
NADH dehydrogenase [ubiquinone] 1 alpha subcomplex subunit 12	Q7TMF3	3	30.34
Prohibitin-2	O35129	3	23.08
Pyruvate dehydrogenase E1 component subunit beta, mitochondrial	Q9D051	2	8.357
Olfactomedin-4 OS=Mus musculus	Q3UZZ4	2	10.3
Vesicle-associated membrane protein 2	P63044	2	20.69
Choline transporter-like protein 1	Q6X893	3	10.11
40S ribosomal protein S4, X isoform	P62702	2	17.11
Transforming growth factor-beta-induced protein ig-h3	P82198	3	8.638
Lysosomal acid phosphatase	P24638	3	7.801
Trem-like transcript 1 protein	Q8K558	2	12.93
OX-2 membrane glycoprotein	O54901	2	10.07
Interferon-activable protein 204	P0DOV2	2	4.362
Actin-related protein 2/3 complex subunit 5	Q9CPW4	2	29.8
Paxillin	Q8VI36	2	5.076
Transgelin	P37804	2	17.91
Proteasome subunit alpha type-3	O70435	2	10.98
Annexin A11	P97384	3	14.91
Alpha-hemoglobin-stabilizing protein	Q9CY02	3	56.86
D-dopachrome decarboxylase	O35215	2	39.83
Cartilage intermediate layer protein 1	Q66K08	3	4.476
Cytochrome c oxidase subunit 5B, mitochondrial	P19536	3	42.19
Myosin-binding protein H	P70402	2	8.903
Protein NDRG1	Q62433	2	7.614
Alpha-aminoadipic semialdehyde dehydrogenase	Q9DBF1	4	10.2
39S ribosomal protein L12, mitochondrial	Q9DB15	3	22.39
40S ribosomal protein S17	P63276	3	40.74
Sodium/potassium-transporting ATPase subunit beta-3	P97370	2	20.5
Chondroitin sulfate proteoglycan 4	Q8VHY0	2	2.535
60S ribosomal protein L7	P14148	2	22.96
Ubiquitin-conjugating enzyme E2 L3	P68037	4	37.66
Heme-binding protein 1	Q9R257	2	25.79
Alpha-1-acid glycoprotein 1	Q60590	2	21.74
Hemogen	Q9ERZ0	2	4.374
Isoform 2 of PDZ and LIM domain protein 5	Q8CI51-2	3	37.09
Plasminogen activator inhibitor 1 RNA-binding protein	Q9CY58	3	13.27
Plasma protease C1 inhibitor	P97290	2	10.32
Electron transfer flavoprotein-ubiquinone oxidoreductase, mitochondrial	Q921G7	3	7.63
H-2 class II histocompatibility antigen, A-U alpha chain (Fragment)	P14438	2	8.811
Coiled-coil-helix-coiled-coil-helix domain-containing protein 2	Q9D1L0	2	26.8
Tenascin	Q80YX1	2	3.365
Xanthine dehydrogenase/oxidase	Q00519	2	4.12
40S ribosomal protein S16	P14131	3	36.3
CDGSH iron-sulfur domain-containing protein 1	Q91WS0	3	42.59
Serine/threonine-protein phosphatase 2A activator	P58389	2	16.1
Tripeptidyl-peptidase 1	O89023	2	7.473
ADP/ATP translocase 2	P51881	10	45.64
RNA transcription, translation and transport factor protein	Q9CQE8	2	16.8
Ras suppressor protein 1	Q01730	2	14.8
Ig gamma-2B chain C region	P01867	2	9.406
Isoform 2 of Synaptophysin-like protein 1	O09117-2	3	11.11
Ras-related protein R-Ras	P10833	2	13.76
ATP-dependent 6-phosphofructokinase, muscle type	P47857	3	15.13
Calpastatin	P51125	2	7.36
NADH dehydrogenase [ubiquinone] 1 beta subcomplex subunit 6	Q3UIU2	2	27.34
Protein quaking	Q9QYS9	2	17.01
NADH dehydrogenase [ubiquinone] 1 alpha subcomplex subunit 5	Q9CPP6	2	28.45
V-type proton ATPase catalytic subunit A	P50516	2	11.35
Na(+)/H(+) exchange regulatory cofactor NHE-RF1	P70441	3	17.18
Cell cycle control protein 50A	Q8VEK0	2	12.36
Macrosialin	P31996	2	5.521
Coronin-1A	O89053	2	11.71
Cysteine-rich protein 1	P63254	2	35.06
Vascular cell adhesion protein 1	P29533	2	5.142
ATP synthase subunit f, mitochondrial	P56135	2	27.27
Collectin-12	Q8K4Q8	8	13.75
Ubiquitin-like modifier-activating enzyme 1	Q02053	3	5.955
Endoplasmic reticulum metallopeptidase 1	Q3UVK0	2	8.352
Xaa-Pro dipeptidase	Q11136	3	9.939
40S ribosomal protein S3a	P97351	2	22.73
Poly(rC)-binding protein 2	Q61990	2	16.3
Voltage-dependent anion-selective channel protein 3	Q60931	3	13.43
NADH dehydrogenase [ubiquinone] iron-sulfur protein 7, mitochondrial	Q9DC70	2	9.821
Peflin	Q8BFY6	2	14.18
GrpE protein homolog 1, mitochondrial	Q99LP6	2	11.98
NADH dehydrogenase [ubiquinone] 1 beta subcomplex subunit 9	Q9CQJ8	2	25.7
Macrophage-capping protein	P24452	1	10.23
Fatty acid-binding protein 5	Q05816	2	19.26
Calpain small subunit 1	O88456	2	38.29
60S ribosomal protein L24	Q8BP67	2	18.47
Aspartate--tRNA ligase, cytoplasmic	Q922B2	2	3.792
Glutamine amidotransferase-like class 1 domain-containing protein 1	Q8BFQ8	2	10.45
Enoyl-CoA hydratase, mitochondrial	Q8BH95	2	16.9
Actin-related protein 2/3 complex subunit 4	P59999	2	17.86
Keratin, type II cytoskeletal 2 epidermal	Q3TTY5	4	7.355
Protein-glutamine gamma-glutamyltransferase 2	P21981	2	2.915
Hippocalcin-like protein 1	P62748	2	20.73
Histidine-rich glycoprotein	Q9ESB3	2	8.952
Complement component receptor 1-like protein	Q64735	2	7.66
Rho GDP-dissociation inhibitor 1	Q99PT1	2	24.51
Actin-related protein 2/3 complex subunit 2	Q9CVB6	2	14.67
Inositol-3-phosphate synthase 1	Q9JHU9	2	14.54
Calpain-1 catalytic subunit	O35350	2	7.714
40S ribosomal protein S12	P63323	3	39.39
ADP-ribosyl cyclase/cyclic ADP-ribose hydrolase 1	P56528	1	11.51
Adenosine deaminase	P03958	2	9.943
Peptidoglycan recognition protein 1	O88593	1	11.54
6-phosphogluconate dehydrogenase, decarboxylating	Q9DCD0	2	13.25
Hydroxyacyl-coenzyme A dehydrogenase, mitochondrial	Q61425	1	18.79
Inter alpha-trypsin inhibitor, heavy chain 4	A6X935	2	6.263
Matrix extracellular phosphoglycoprotein	Q8K4L6	2	19.27
Histone-lysine N-methyltransferase Smyd1	P97443	2	8.163
Aldehyde dehydrogenase family 3 member B1	Q80VQ0	2	5.128
Pyruvate dehydrogenase protein X component, mitochondrial	Q8BKZ9	2	9.98
Betaine--homocysteine S-methyltransferase 1	O35490	1	9.582
60S ribosomal protein L4	Q9D8E6	1	4.296
Extracellular superoxide dismutase [Cu-Zn]	O09164	3	28.29
Hydroxymethylglutaryl-CoA lyase, mitochondrial	P38060	2	9.846
Cytochrome b5 type B	Q9CQX2	2	32.19
Integrin alpha-1	Q3V3R4	1	4.326
Carboxymethylenebutenolidase homolog	Q8R1G2	1	11.02
Neutral amino acid transporter B(0)	P51912	1	5.967
Actin-related protein 2	P61161	3	12.69
Cysteine-rich protein 2	Q9DCT8	2	40.87
Neutrophil cytosol factor 2	O70145	1	6.667
von Willebrand factor	Q8CIZ8	1	2.204
N(G),N(G)-dimethylarginine dimethylaminohydrolase 2	Q99LD8	2	14.39
CD151 antigen	O35566	2	12.25
Isoform 2 of Low molecular weight phosphotyrosine protein phosphatase	Q9D358-2	2	16.46
U6 snRNA-associated Sm-like protein LSm8	Q6ZWM4	1	27.08
Thymosin beta-4	P20065	1	38
Platelet-activating factor acetylhydrolase IB subunit alpha2	Q61206	1	17.47
Beta-hexosaminidase subunit alpha	P29416	1	6.818
Ectonucleoside triphosphate diphosphohydrolase 1	P55772	2	18.43
Cytosolic non-specific dipeptidase	Q9D1A2	2	10.74
Grancalcin	Q8VC88	1	12.73
T-complex protein 1 subunit theta	P42932	2	5.292
Histone H1.4	P43274	11	36.07
BTB/POZ domain-containing protein KCTD1	Q6WVG3	3	8.869
Syntaxin-12	Q9ER00	2	10.22
Probable aminopeptidase NPEPL1	Q6NSR8	2	9.351
C-type mannose receptor 2	Q64449	1	3.854
Secretory carrier-associated membrane protein 2	Q9ERN0	1	9.726
Integrin alpha-5	P11688	1	2.849
Cathepsin G	P28293	1	18.01
Transmembrane emp24 domain-containing protein 4	Q8R1V4	2	18.94
Tubulin alpha-4A chain	P68368	9	30.13
N-acetylgalactosamine-6-sulfatase	Q571E4	1	10.38
Clathrin light chain A	O08585	1	25.96
Histone H2AX	P27661	23	49.65
CD9 antigen	P40240	6	37.61
Transforming protein RhoA	Q9QUI0	1	24.87
Ribonucleoside-diphosphate reductase subunit M2	P11157	1	9.231
Cell adhesion molecule 1	Q8R5M8	1	11.18
Nucleoporin p58/p45	Q8R332	1	9.029
5'-3' exonuclease PLD3	O35405	2	4.303
DAZ-associated protein 1	Q9JII5	1	8.867
S-methyl-5'-thioadenosine phosphorylase	Q9CQ65	1	15.55
Annexin A7	Q07076	1	7.343
Calcium-binding protein 39	Q06138	1	10.26
Macrophage mannose receptor 1	Q61830	1	3.297
Cardiomyopathy-associated protein 5	Q70KF4	2	1.765
DnaJ homolog subfamily C member 5	P60904	1	20.71
Protein S100-A6	P14069	2	16.85
Tyrosine-protein phosphatase non-receptor type substrate 1	P97797	1	7.992
Putative phospholipase B-like 2	Q3TCN2	1	4.209
Aminoacylase-1	Q99JW2	1	9.069
Glycolipid transfer protein	Q9JL62	2	24.88
Collagen alpha-2(IX) chain	Q07643	8	8.43
Mast cell-expressed membrane protein 1	Q9D8U6	1	20.22
Heterogeneous nuclear ribonucleoproteins A2/B1	O88569	1	18.7
C-type lectin domain family 3 member A	Q9EPW4	2	8.673
Lymphocyte antigen 6C2	P0CW03	1	28.24
Ig gamma-2A chain C region secreted form	P01864	1	8.955
Phospholipase A2 group XV	Q8VEB4	1	9.223
Calsequestrin-1	O09165	1	5.926
V-type proton ATPase subunit E 1	P50518	1	17.26
Mitochondrial import inner membrane translocase subunit Tim13	P62075	1	26.32
Protein transport protein Sec61 subunit beta	Q9CQS8	1	26.04
Stomatin	P54116	1	9.507
Acylpyruvase FAHD1, mitochondrial	Q8R0F8	1	16.3
V-type proton ATPase subunit B, brain isoform	P62814	1	3.718
H-2 class II histocompatibility antigen gamma chain	P04441	1	8.602
Integrin alpha-4	Q00651	1	3.08
EMILIN-1	Q99K41	7	4.228
Thioredoxin reductase 1, cytoplasmic	Q9JMH6	1	6.525
40S ribosomal protein S13	P62301	1	16.56
Pyridoxal phosphate homeostasis protein	Q9Z2Y8	2	16.42
Ubiquitin-conjugating enzyme E2 C	Q9D1C1	2	20.67
Band 4.1-like protein 3	Q9WV92	1	3.229
60S ribosomal protein L19	P84099	1	16.84
ATP synthase membrane subunit K, mitochondrial	Q78IK2	1	27.59
Small muscular protein	Q9DC77	1	48.24
Fetuin-B	Q9QXC1	1	6.186
Heterogeneous nuclear ribonucleoprotein H	O35737	3	11.14
Proteolipid protein 2	Q9R1Q7	1	30.92
Telethonin	O70548	1	16.17
Myosin light chain 6B	Q8CI43	2	27.05
Splicing factor 3B subunit 3	Q921M3	1	3.122
ELAV-like protein 1	P70372	1	12.88
Equilibrative nucleoside transporter 1	Q9JIM1	1	4.565
Ragulator complex protein LAMTOR1	Q9CQ22	1	15.53
Calcineurin B homologous protein 1	P61022	1	10.26
Ras-related protein Rab-44	Q8CB87	2	4.008
Oxygen-regulated protein 1	P56716	1	1.05
Cytochrome c1, heme protein, mitochondrial	Q9D0M3	1	8.615
NADH dehydrogenase [ubiquinone] 1 beta subcomplex subunit 5, mitochondrial	Q9CQH3	1	13.76
Serine/threonine-protein kinase N1	P70268	1	2.537
60S ribosomal protein L29	P47915	1	17.5
S-formylglutathione hydrolase	Q9R0P3	1	6.028
60S ribosomal protein L14	Q9CR57	1	11.52
Kynurenine--oxoglutarate transaminase 1	Q8BTY1	1	4.953
Caveolae-associated protein 1	O54724	1	6.378
Actin, alpha cardiac muscle 1	P68033	241	80.37
Isoform M1 of Pyruvate kinase PKM	P52480-2	29	53.48
Isoform 6 of LIM domain-binding protein 3	Q9JKS4-6	24	85.76
Histone H2B type 1-C/E/G	Q6ZWY9	40	70.63
Keratin, type II cytoskeletal 79	Q8VED5	3	10.73
Keratin, type II cytoskeletal 2 oral	Q3UV17	3	5.219
Alpha-1-acid glycoprotein 2	P07361	2	12.56
Leucine-rich repeat-containing protein 20	Q8CI70	1	22.83
Fibrinogen gamma chain	Q8VCM7	1	3.211
Leucine-rich repeat-containing protein 45	Q8CIM1	1	4.03
Protein PRRC1	Q3UPH1	1	5.418
U6 snRNA-associated Sm-like protein LSm3	P62311	1	17.65
Collagen alpha-1(XI) chain	Q61245	3	5.987
Carboxypeptidase N subunit 2	Q9DBB9	1	5.119
Serine incorporator 3	Q9QZI9	1	4.025
ATP synthase subunit g, mitochondrial	Q9CPQ8	1	19.42
Protein disulfide-isomerase A6	Q922R8	1	5.909
26S proteasome non-ATPase regulatory subunit 2	Q8VDM4	1	1.762
28S ribosomal protein S7, mitochondrial	Q80X85	1	7.438
Peptidyl-prolyl cis-trans isomerase B	P24369	1	8.796
Cystatin-C	P21460	1	17.14
Ribosome biogenesis protein WDR12	Q9JJA4	1	1.655
NADH dehydrogenase [ubiquinone] 1 alpha subcomplex subunit 11	Q9D8B4	1	7.801
ATP synthase F(0) complex subunit C1, mitochondrial	Q9CR84	1	5.147
28S ribosomal protein S36, mitochondrial	Q9CQX8	1	23.53
NHL repeat-containing protein 3	Q8CCH2	1	4.035
Sarcospan	Q62147	1	4.167
Atypical kinase COQ8A, mitochondrial	Q60936	1	2.481
Apoptosis regulator BAX	Q07813	1	6.771
Isochorismatase domain-containing protein 2A	P85094	1	8.252
SUMO-conjugating enzyme UBC9	P63280	1	6.329
Myotrophin	P62774	1	14.41
Platelet glycoprotein Ib beta chain	P56400	1	8.252
Cytochrome c oxidase subunit 7A1, mitochondrial	P56392	1	16.25
Stathmin	P54227	1	8.725
C-type lectin domain family 10 member A	P49300	1	6.908
Cytochrome c oxidase subunit 6A2, mitochondrial	P43023	1	12.37
Lymphocyte antigen 6G	P35461	1	18.66
60S acidic ribosomal protein P0	P14869	1	3.47
60S ribosomal protein L27a	P14115	1	7.432
Band 3 anion transport protein	P04919	1	1.076
Ig alpha chain C region	P01878	1	4.36
Voltage-dependent calcium channel gamma-1 subunit	O70578	1	7.623
Splicing factor 3A subunit 1	Q8K4Z5	1	6.321
Serine/threonine-protein phosphatase 2B catalytic subunit alpha isoform	P63328	1	12.09
Myozenin-3	Q8R4E4	2	15.1
Gamma-glutamyl hydrolase	Q9Z0L8	1	3.785
Deoxyribonuclease-2-alpha	P56542	1	5.382
CD82 antigen	P40237	1	4.135
H-2 class I histocompatibility antigen, Q10 alpha chain	P01898	5	25.54
Carnitine O-palmitoyltransferase 2, mitochondrial	P52825	2	8.207
40S ribosomal protein S20	P60867	1	25.21
Cytochrome b-245 light chain	Q61462	1	20.31
Early endosome antigen 1	Q8BL66	1	5.882
Dipeptidyl peptidase 4	P28843	2	4.474
Ribosyldihydronicotinamide dehydrogenase [quinone]	Q9JI75	2	12.99
Putative mitochondrial import inner membrane translocase subunit Tim8 A-B	Q4FZG7	1	24.74
Complement C1q subcomponent subunit A	P98086	1	5.306
Synaptosomal-associated protein 23	O09044	1	6.667
NADH dehydrogenase [ubiquinone] iron-sulfur protein 4, mitochondrial	Q9CXZ1	1	22.86
Phospholemman	Q9Z239	1	13.04
Osteoclast-stimulating factor 1	Q62422	1	11.63
Neutrophil elastase	Q3UP87	2	14.72
Hepatocyte growth factor-regulated tyrosine kinase substrate	Q99LI8	1	2.581
Polyadenylate-binding protein 1	P29341	1	4.874
Peptidyl-prolyl cis-trans isomerase FKBP1A	P26883	1	12.04
Synaptogyrin-2	O55101	1	4.464
Coagulation factor IX	P16294	2	3.185
Synaptopodin 2-like protein	Q8BWB1	1	3.692
ADP-ribosylation factor 4	P61750	3	26.67
Glutaredoxin-1	Q9QUH0	1	16.82
Ribonuclease inhibitor	Q91VI7	2	22.37
AP-2 complex subunit alpha-1	P17426	1	1.74
Interleukin-1 receptor accessory protein	Q61730	1	1.754
Peroxiredoxin-4	O08807	6	26.28
Paralemmin-1	Q9Z0P4	1	12.27
Isoform 9 of Myelin basic protein	P04370-9	2	19.02
WD repeat-containing protein 1	O88342	1	2.475
Proteasome subunit beta type-4	P99026	1	7.197
Isoform 2 of Synaptopodin	Q8CC35-2	1	3.552
3-ketoacyl-CoA thiolase A, peroxisomal	Q921H8	1	8.491
Glutathione S-transferase A1	P13745	2	8.969
RNA-binding motif protein, X chromosome	Q9WV02	2	10.74
Dynein light chain roadblock-type 1	P62627	1	12.5
ADP-ribosylation factor-like protein 8B	Q9CQW2	2	38.17
Cytochrome c oxidase subunit 7C, mitochondrial	P17665	1	28.57
Protein NipSnap homolog 2	O55126	1	17.08
COMM domain-containing protein 3	Q63829	1	5.128
Pre-mRNA-processing factor 19	Q99KP6	1	7.143
Muscleblind-like protein 1	Q9JKP5	1	13.49
Cytosolic 10-formyltetrahydrofolate dehydrogenase	Q8R0Y6	1	2.882
Target of Myb protein 1	O88746	1	11.59
Complement C4-B	P01029	1	3.567
Cytochrome c oxidase subunit 7A2, mitochondrial	P48771	1	12.05
Mitochondrial pyruvate carrier 1	P63030	1	7.339
Apolipoprotein C-III	P33622	1	19.19
NADH dehydrogenase [ubiquinone] flavoprotein 3, mitochondrial	Q8BK30	1	22.12
PRA1 family protein 3	Q8R5J9	2	19.68
Acyl-protein thioesterase 1	P97823	1	12.17
Pro-interleukin-16	O54824	1	2.345
Junctional sarcoplasmic reticulum protein 1	Q3MI48	1	13.55
Small ubiquitin-related modifier 3	Q9Z172	1	10.91
Beta-adrenergic receptor kinase 2	Q3UYH7	1	1.017
Hemoglobin subunit beta-H1	P04444	1	23.13
WAS/WASL-interacting protein family member 1	Q8K1I7	1	3.245
Haloacid dehalogenase-like hydrolase domain-containing protein 2	Q3UGR5	1	8.494
Angiotensin-converting enzyme	P09470	1	2.363
Adenylyl cyclase-associated protein 2	Q9CYT6	3	10.08
U2 small nuclear ribonucleoprotein B''	Q9CQI7	2	20.44
Proliferation marker protein Ki-67	E9PVX6	1	1.668
High mobility group protein B1	P63158	1	17.67
Tubulin beta-4B chain	P68372	5	33.26
Calpain-8	Q91VA3	1	1.422
Bcl-2-like protein 13	P59017	1	4.839
Tetraspanin-14	Q8QZY6	1	10
Flavin reductase (NADPH)	Q923D2	1	20.39
Ubiquitin carboxyl-terminal hydrolase 5	P56399	2	3.38
H-2 class I histocompatibility antigen, K-B alpha chain	P01901	4	25.2
Histone-binding protein RBBP7	Q60973	1	3.765
60S ribosomal protein L23	P62830	1	18.57
Isoform 2 of Clathrin light chain B	Q6IRU5-2	1	33.65
Alpha-2-antiplasmin	Q61247	1	7.128
Immunoglobulin superfamily member 8	Q8R366	1	2.619
Talin-2	Q71LX4	7	5.979
Ras-related protein Rab-27B	Q99P58	2	20.64
Bcl-2 homologous antagonist/killer	O08734	1	13.4
Tartrate-resistant acid phosphatase type 5	Q05117	1	9.48
Proline-rich protein 33	Q8C494	2	10.38
Intercellular adhesion molecule 1	P13597	1	6.89
Succinyl-CoA:3-ketoacid coenzyme A transferase 1, mitochondrial	Q9D0K2	1	6.731
Vesicular integral-membrane protein VIP36	Q9DBH5	1	8.659
Corrinoid adenosyltransferase	Q9D273	1	4.219
Ubiquitin-associated protein 2-like	Q80X50	1	0.813
ATP-dependent RNA helicase DHX29	Q6PGC1	1	2.857
Apolipoprotein A-II	P09813	1	24.51
Hematopoietic progenitor cell antigen CD34	Q64314	1	10.21
5'-3' exonuclease PLD4	Q8BG07	1	4.374
T-complex protein 1 subunit beta	P80314	1	7.664
Ig heavy chain V region MOPC 47A	P01786	1	7.692
Aldehyde oxidase 3	G3X982	1	0.5243
Fibrinogen alpha chain	E9PV24	1	4.056
Proteasome subunit beta type-1	O09061	1	12.08
Ig kappa chain V-II region 26-10	P01631	1	17.7
Glutathione S-transferase kappa 1	Q9DCM2	1	26.11
High mobility group protein B2	P30681	1	3.81
Copine-3	Q8BT60	1	3.377
Heat shock 70 kDa protein 4	Q61316	1	6.064
Phospholipase D2	P97813	1	2.358
Voltage-gated potassium channel subunit beta-2	P62482	1	5.45
Collagen triple helix repeat-containing protein 1	Q9D1D6	1	9.796
Beta-2-microglobulin	P01887	1	7.563
Cerebral dopamine neurotrophic factor	Q8CC36	1	10.16
Arf-GAP with SH3 domain, ANK repeat and PH domain-containing protein 2	Q7SIG6	1	0.8351
Ras-related protein Rab-1B	Q9D1G1	5	43.28
Succinate--CoA ligase [ADP/GDP-forming] subunit alpha, mitochondrial	Q9WUM5	1	9.538
Guanine nucleotide-binding protein G(I)/G(S)/G(O) subunit gamma-12	Q9DAS9	1	25
Proteasome subunit alpha type-4	Q9R1P0	1	9.962
Heterogeneous nuclear ribonucleoprotein A3	Q8BG05	1	5.805
Small nuclear ribonucleoprotein Sm D3	P62320	1	24.6
Small glutamine-rich tetratricopeptide repeat-containing protein alpha	Q8BJU0	1	11.75
Microsomal glutathione S-transferase 3	Q9CPU4	1	9.15
3-hydroxyacyl-CoA dehydrogenase type-2	O08756	1	4.598
Non-POU domain-containing octamer-binding protein	Q99K48	1	4.863
Nuclear mitotic apparatus protein 1	E9Q7G0	1	2.292
Endophilin-B2	Q8R3V5	2	9.25
Small nuclear ribonucleoprotein-associated protein N	P63163	1	6.25
60S ribosomal protein L8	P62918	2	10.51
Actin-related protein 2/3 complex subunit 1B	Q9WV32	1	8.333
60S ribosomal protein L17	Q9CPR4	1	4.891
