# Supplementary material for: Morquio A Syndrome: Identification of Differential Patterns of Molecular Pathway Interactions in Bone Lesions
Source: Int J Mol Sci. 2024 Mar 12;25(6):3232. doi: 10.3390/ijms25063232 (PMC10970612; doi:10.3390/ijms25063232)
Supplement: Supplementary file 1 [file ijms-25-03232-s001.zip › supplementary table S7.xls]

## Sheet: Venn diagram Fig 13A
Only Bone mouse	Only Human fibroblast	Only Human Leukocytes	Bone Mouse plus Human fibroblast	Bone Mouse plus Human Leukocytes	Human fibroblast plus Human Leukocytes	COMON to all
Serpinb1a	Rpl0	Tkt	Rps18	Prdx5	Ran	Ldha
Col11a2	Ugdh	K22e	Eno1	Pgm1	Clic1	Ldhb
Gpd1	Flnc	Dest		Arpc3	Ganab
Tf	Tardbp	Ostf1		Aldoa
Atp5f1d	Col6a3	G6pd		Arpc5
Fth1	Actn4	Typh
H2az2	Sar1a	Wdr1
H1-1	Coro1c	Cnn2
Rab11b	P4hb	Pp1a
Ndufa13	Fkbbp10	ApoA2
Ndufs1	Rpl5	F13a
M6pr	Colgalt1	Atpa
Serpina3k	Rab1a	Pical
Cox5a	Cavin1	Vata
Kera	Carl	Mdhm
Ndufb9	Rpl7	Acon
Gdpd2	Pgm3	Thtr
Calm3	Rpsx4	Roa1
Rras	Hnrnpk	K2c6a
Fmod		Tpm1
Rab5c		Leg3
Cisd1		H15
Mmp9		Atpb
Mb		Hnrpk
Atp5pd		Hmbgb2
Atp5pb		G3p
Cdc42		Cd14
Tln1		Aatm
H4c1		Ipyr2
Cox6a2		Atpd
Itgav		Anxa4
Atp5po		H13
Hapln1		Ub2L3
Itga7		Vps35
Hpx		Apt
Flnb		Anxa6
Sod1		Etfa
Psme2		Cisy
Cox6c		K1c9
Col1a2		Pebp1
S100a8		Psa
Vcam1		6Pgd
Dcn		Affb
Cox7a2		K2c1
Sdha		Hba
Prdx1		Coro1a
Lgals3		Tera
Rps20		Ch10
Prelp		Hbb
Fabp3		Pcbp2
Ubb		Stip1
Lasp1		moes
Col11a1		Ch60
Alb		Anxa1
Eci1		Kapca
Pdhb		Pur8
Asah1		Ef1a3
Acadvl		Arp2
Lum		septin 7
Myfpl		Ighg3
Rtn2		Pygl
Rps5		Tpm4
Myom1		Odpb
S100a9		Sptn1
Hbb-b1		arc1b
Atp5mf		Tthy
Ndufa6		Ceam6
Idh3a		K1c14
Prdx3		Kpym
Tnnc2		Pgk1
Arpc5l		Erp29
Uqcrfs1		Actb
Tpd52l2		Det1
Eno3		G6pi
Dpep1		Argi1
H1-0		Pdia3
Rps19		Ola1
Rpl12		Psme1
Ube2n		Vasp
Lamp1		Stxb2
Itgam		Em55
Mdh2
H1-4
Rps25
Itgb2
Ctsh
Capza2
Ndufv1
Lgals1
Ndufc2
Hspg2
Chad
H1-2
Hp
Prdx2
Myl2
Thbs1
Acta1
Gpi
Col2a1
Col1a1
Rhoa
Fetub
Ckmt2
Ctsd
Atp5mk
Tpi1
Sdhb
Cox6b1
Serpinf1

## Sheet: Venn diagram Fig 13AB
Only Bone mouse	Only Marco L Hennrich et al ref 29	Only Konstantinos C Tsolis et al	Bone Mouse plus Marco L Hennrich et al ref 29	Bone Mouse plus Konstantinos C Tsolis et al	Marco L Hennrich et al ref 29 plusKonstantinos C Tsolis et al	COMMON proteins
Atp5mk	Tnfrsf13b	Anfy1	Itgb2	Chad	Dhx9	Cox6c
Kera	Itm2a	Dema	Cox7a2		Hebp2	Prdx3
Hbb-b1		Assy	Fth1		Vps28	Prelp
Serpinb1a	Sergef	If5	Ctsh		Gstm2	Prdx2
Ckmt2	Fam109a	Ubp5	S100a9		Capzb	Flnb
H1-1	Ruvbl2	Dnjb1	Col1a1		Ptgr1	Arpc5
Calm3	Lyz	Nibl1	Hp		Ppia	Lasp1
Atp5mf	Ssu72	Tbb2a	Itga7		Strbp	Lum
H2az2	Eif2b2	Hprt	Rps18		Actn4	Ldhb
Serpina3k	C10orf90	P5cr1	Arpc5l		Tigar	Asah1
Gdpd2	Cep290	Pcyox	Mmp9		Hdgf	Arpc3
Atp5pd	Ifrd2	Mrp1	Ndufa6		Tnpo1	Cox5a
H4c1	Setd6	Htr5a	Ndufc2		Apex1	Psme2
Myfpl	Polr3c	Al9a1	Eno3		Aimp1	Fmod
Atp5pb	Pex19	C1glt	Hpx		Gnaq	Vcam1
H1-4	Psma4	Ldh6a	Fetub		Timp1	Prdx5
H1-2	Pkia	Hnrpq	Ndufs1		Aida	Rhoa
Atp5po	Bcl7a	Eftu	Acta1		Fahd1	Cisd1
Ubb	Dio1	Rs3a	Thbs1		Ap1s1	Cdc42
H1-0	Nfatc2ip	3hao	Eno1		Ddx42	Aldoa
Atp5f1d	Bnip3l	Vtnc	Ndufa13		C1qbp	Ldha
Cox6a2	Cachd1	Guaa	M6pr		Mrc2	Prdx1
Myl2	Ccdc173	Vinc	Col11a2		Tecr	Pgm1
	Dnajc21	Anprc	Gpi		Tusc3	Lamp1
	Igll5	Csn3	Tnnc2		Fas	Tln1
	Trmt5	Cata	Rpl12		Pir	Eci1
	Snip1	Txtp	Rab11b		Bcat1	Ube2n
	B9d2	Syvc	Rps19		Pon2	Rab5c
	Ap5s1	Nrdc	Rps20		Ran	Idh3a
	Lnx2	Pur4	Itgam		Mcat	Rras
	Phax	Chm1b	Tpi1		Calr
	Spock2	Spta2	Serpinf1		Ddah2
	Col10a1	Nh2l1	Lgals1		Sfrp1
	Atp13a1	At1b1	Sdhb		Sil1
	Itgb7	Rm01	Alb		Tmco1
	Rplp2	K1609	Pdhb		Ostc
	Hmgn3	Lkha4	Uqcrfs1		Srp68
	Gpn3	Rl9	Mdh2		Pgm2
	Ttll11	Acadv	Hspg2		Tpr
	Il22	Rl13a	Itgav		Asph
	Psmg2	Pcat1	Col1a2		Crip2
	Mettl22	Al3a1	Tf		Srsf3
	Med4	Ut1	Ndufb9		Cpt1a
	Ifi30	F16b1	Rps25		Pld3
	Tchh	Cp013	S100a8		Abcb6
	Mief1	Ppac	Col2a1		Srprb
	Gtf2e2	Serb	Mb		Dhcr7
	Steap3	Mca3	Dcn		Eif3g
	Triqk	Ampb	Gpd1		Syne1
	Loxl1	Mpcp	Rps5		Uba1
	Ano2	If5a1	Sod1		Fam3c
	Gpa33	K1199	Ctsd		Wdr87
	Kcnh1	Osbp1	Cox6b1		Emp3
	Tlr9	Ccd56	Fabp3		Copg2
	Tango2	Adt3	Rtn2		Galk1
	Slc25a15	S10a1	Tpd52l2		Bax
	Rnf115	P4k2a	Col11a1		Nsdhl
	Neil1	Csk21	Acadvl		Psmd5
	Chst12	If4h	Capza2		Dpp3
	Lzts1	Hs105	Myom1		Cpne2
	Arhgap35	Tera	Ndufv1		Nrm
	Sspn	Sptb2	Sdha		Aifm1
	Fam73b	At1a1	Lgals3		Lman2
	C1qtnf4	Eloc	Dpep1		Dtd1
	Sowahc	Syep	Hapln1		Txnl1
	Nup188	Rae1l			Lima1
	Mex3b	Gshr			Hira
	Grk5	Rm12			Esyt1
	Asb14	Pm14			Ncbp1
	Pmm1	Qcr7			Snd1
	Pgap2	Gde			Cand1
	Pithd1	Atx10			Atg5
	Def8	Coga1			Cndp2
	Dnajc11	Gabt			Crim1
	Znf547	Thik			Pcna
	Ccdc155	Praf1			Postn
	C15orf41	Aaat			Eri3
	Rab9b	Ergi3			Golm1
	Vsig8	Pura1			Cd59
	Bbx	Sc24a			Acads
	Slc35e3	Dhso			Vegfc
	Ncoa4	Psb5			Tmed7
	C20orf27	Dhb4			Cdipt
	Mrps9	Rl29			Acsl3
	Prkag2	Qorl1			Sumf1
	Nmt1	Psb9			Sumf2
	Arhgap29	Sygp1			Mat2b
	Cd22	Sphm			Idh3b
	Gpr111	Cskp			Pa2g4
	Tubb8	K6pp			Abcb8
	Mp68	Pdli5			Plod1
	Ccdc106	Efgm			Mxra8
	Nup210	Decr			Glrx3
	Sharpin	Ub2v2			Matr3
	Nos1	Rb11b			Eif3b
	C1rl	Ccd47			Tmtc3
	Sod2	Nnre			Gstt1
	Cdk6	Glo2			Ap2a1
	Nol4l	Rl17			P4ha2
	Sh3rf1	Hipl2			Rai14
	Mt-cyb	Sahh			Clic4
	Tcea2	Clp1l			Pvr
	Fam83h	Nduv1			Prep
	Mad1l1	Atpa			Lsm6
	Camk4	Tcpe			Cnot1
	Il17ra	Kad2			Dbnl
	Aig1	Catz			Rraga
	Klb	Erln2			Irgq
	Atp6v1e1	Neua			Vdac1
	Tmsb10	Tba1b			Ghdc
	Spata2l	Sh3g1			Myo1c
	Kiaa0556	Fubp2			Ilf2
	Pla2g4e	Atpo			Ppif
	Asap1	Vath			Ufl1
	Sorl1	Ferm2			Srpx2
	Emsy	Leg8			Uba6
	Pcbd2	Fnd3a			Ift81
	Rpl37	Atd3a			Pawr
	Tmem133	Shrm3			Sar1a
	Armcx2	Tppc3			Dctn5
	Dda1	Dhc24			Gsto1
	Ptprk	Sc31a			Erp44
	Ptger3	Thim			Ryr1
	Mdc1	H2b1d			Reck
	Kit	An32a			Dse
	Otud5	Coca1			Copb2
	Sult1a1	Pi42c			Hdhd3
	Gata1	Recq1			Xpc
	Zbtb47	F13a			Ethe1
	Flywch1	Pncb			Sbds
	Trps1	Rl23			Trap1
	Neil2	Nckp1			Pcbp1
	Eef1g	Face1			Cmbl
	Rad51d	Pp1b			Strap
	Cacfd1	Ibp7			Ggct
	Kif28p	Erf1			Ndrg1
	Atp7b	Ccd25			Lrp1
	Grem2	Pa1b2			Ap2m1
	Glt6d1	Pepl			Snx2
	Vamp2	Arhg2			Sgcd
	Fstl3	Co9			Ppib
	Il10rb	Qcr1			Idua
	Spata19	Sycm			Map1b
	Nt5dc1	M2om			Syvn1
	Taf5l	Nps3a			Ddx5
	Pfkl	Co1a1			Adgb
	Nop9	Asml			Igsf8
	Rbbp6	Tom70			Arf4
	Gbf1	Def1			Ivd
	Cinp	Prp8			Gstk1
	Plp1	Plrkt			Dhrs4
	Ndufs4	Hcdh			Flot2
	Bpifb6	Abheb			Fgf1
	Tst	Lrc59			Hyou1
	Nln	Rmd1			Lonp2
	C1qtnf7	Pcoc2			Ryr3
	Nid2	Nudc2			Pdia5
	Fam117b	Cyfp1			Timp3
	Mrpl38	Crel2			Lsm2
	Crabp2	Kgua			Lmnb1
	Ehmt1	H2a1d			Rab7a
	Ubr3	Ptn9			Sts
	C11orf88	Spp24			Ostf1
	Dnajc7	Gdir2			Bcam
	Tor3a	Paxi			Ktn1
	Ccdc134	Itih6			Ptbp2
	Sucnr1	Ca123			Lamp2
	Il4i1	Mmsa			Nono
	Nup37	Gsh1			Stip1
	Loc389199	Ret4			Hyi
	Sppl2b	Gbrl2			Hexb
	Sox21	Prcm			Ptges
	Pi4k2a	Sc23a			Stt3b
	Phospho1	Sps1			Hmgb1
	Mrpl48	Ppcel			Zfp62
	Rpl24	Irg1			Sumo2
	Cyp26c1	Cc50a			Rdh14
	Mlf2	Co9a2			Dkc1
	Col9a2	Cpsf5			Ehd1
	Dock6	Ita3			Raph1
	Khdrbs3	Ki13b			Cers2
	C6orf15	Pgam2			Ufsp2
	Zg16	Comd3			Psmd3
	Fam207a	E41l2			Spry4
	Wls	Est1			Copz1
	Larp7	Htr7a			Spcs3
	Gbe1	Diac			Sec62
	Wdr3	Hnrh2			Mtch2
	Ctbp2	Rl10			Ipo7
	Itpripl2	Perm			Rab1b
	Hs3st1	Acl6a			Apoe
	Fsbp	Spsy			Ccs
	Ankmy1	Al7a1			Atp5l
	Baz1a	2aaa			Kntc1
	Cmtr2	Rl10a			Aip
	Ptprs	Pur6			Ckap5
	Cep76	Erlec			Gltp
	Fcgr2a	Acon			Fkbp3
	Tubb4b	Gshb			Hgs
	Tysnd1	Itb2			Cnn2
	Tmc2	Aatc			Vnn1
	Lta4h	Csk2b			Apmap
	Cylc2	Syfa			Crtap
	Or5k3	Sc65			Acox1
	Rasa2	Pa2ga			Cln5
	Dnah9	Rs17			Mprip
	Rasgrp2	Lclt1			Ppih
	Eed	Ufd1			Fxr1
	Agpat3	Ost48			Eif3i
	Syt16	Vpp3			Wdr18
	Med23	Rm38			Bzw1
	Icmt	Dx39b			Anxa1
	Eef1d	Trfm			Tpm4
	Tk2	Ezri			Naa15
	Rgl1	Gblp			Tmed1
	C11orf73	Echa			Adrm1
	H2bfm	Emil1			Rras2
	Cpxm1	Ak1c3			Pcca
	Alms1	Mrt4			Wdr11
	Fgg	Catc			Susd2
	Brms1l	Piez1			Gbp1
	Cd33	Retst			Tmed9
	Sh3bp4	Fprp			Ddah1
	Nmral1	Gbb1			Ampd2
	Muc16	Ub2d3			Hibch
	Llph	Pdli7			Sulf1
	C2orf44	Praf3			Pml
	Ocrl	Ntkl			Phf3
	Ppp2ca	Nfm			Atg3
	Myh3	Gapr1			Dctn4
	Ppp2r5b	Moes			Icam1
	Mtx3	S10ag			Lpar1
	C9orf16	Tba1a			Rbx1
	Rbm48	Biea			Ubfd1
	Ckb	Canb1			Huwe1
	Il23r	S10aa			Ccdc6
	Rpl27	Pgfrb			Mcm4
	Adora3	2a5e			Ap2b1
	Usp13	Tpis			Asns
	Espnl	Cilp2			Rhog
	Nts	Dpyl3			Pdcd6
	Slc22a16	Rs27a			Zyx
	Hist1h1a	Rpr1b			Atp5i
	Coa4	Al4a1			Rab14
	Thumpd2	Gels			Mmp14
	Caprin1	Glyg			Gmds
	Lamc2	Horn			Acot2
	Ndufb3	Psb7			Srsf1
	Zbtb38	Fkb10			Ap3m1
	Rtf1	Co3a1			Mgp
	Dab2ip	H10			Sypl1
	Znf585b	Ima7			Arsb
	Ttll6	Ndus3			Ddx17
	Tacc3	Rb6i2			Tpp2
	Senp3	Ileu			Gstp1
	Ptpru	Rl27			Pef1
	Cab39l	Ttc35			Ppme1
	Sytl1	Co6a1			Lims1
	Dxo	Mt2			Cecr2
	Tomm40	Mgn2			Gnai2
	Scarb1	Cofa1			Stat3
	Mrpl1	2aba			Lhpp
	Fam71a	Scam3			Coq9
	Coa1	Idhc			Eif3d
	Eva1b	Glcm			Aldh2
	Sidt1	Gnpi1			Aqr
	C1qtnf1	Pimt			Ap1b1
	Cbll1	Aer61			Exph5
	Ube2m	H2av			Lmnb2
	Card6	Gtr3			Pank4
	Trim24	Tripb			Fbxl8
	Mrps33	Ndub4			Mpzl1
	Pla2g12a	Acdsb			Psmf1
	Pf4	B4gt7			Sync
	Arfgef3	Ch60			Strn4
	Ankrd49	Srp09			Pxdn
	Cox7b	Ppp5			Pigt
	Tecpr1	If4a3			Pdia3
	Npm1	1433b			Dab2
	Mboat7	Glrx1			Calu
	Bicd2	Rhg01			Lmf2
	Ppm1h	Tm173			Psmd2
	Rbm25	Pp2ab			Gmfb
	Gclm	Arnt2			Eif2a
	Cep63	Ubc12			Clcn7
	Nup210l	Rl4			Ipo5
	Mapk7	Rs23			Lrba
	Rgmb	Chch3			Gpx7
	Mtus2	Sac1			Pi4ka
	Tars2	Snag			Emd
	Dbndd1	Ndka			Pebp1
	Grik3	Gdn			Dpm1
	Stxbp5	Ep15r			Cisd2
	Crtac1	Caza1			Ube4a
	Gcdh	Pgbm			Cmc2
	Ccdc68	Kprb			Fkbp2
	Dmap1	Ita1			Tbl2
	Znf106	Pfd6			Erap1
	Ces1p1	Bex5			Apob
	Or1s2	6pgl			Purb
	Whsc1	Utro			Rpn1
	Rufy1	Z3h7b			Setd2
	Wasf3	Mboa7			Acad9
	A2m	Tens3			Mtap
	Dpy19l1	Mp3b2			Gna11
	Gtse1	Mare1			Edil3
	Cipc	Tcp4			Sgta
	Snap29	Nb5r2			Prrc1
	Csnk2b	Kad4			Ubr4
	Nop56	Co3			Mest
	Zhx1	Pcy2			Pygl
	Runx2	Qor			Snx12
	Gbas	1a30			Anxa2
	Rhag	Rs25			Dhrs7
	Tuba8	S35b2			Ano6
	Ptprz1	Orn			Rtn3
	Spocd1	Psd7			Abi1
	Sptbn2	Pttg			Parva
	Zfp36l2	Roa2			Csde1
	Efhc1	Psa7			Ubn2
	Suclg1	Ci064			Fhl2
	Hla-b	Grp75			Naca
	Brwd3	Tmeda			Gas6
	Map2	Enpl			Apoo
	Heca	Ruxe			Dcaf8
	Sfxn2	Abd12			Drg1
	Isca2	Dldh			Fabp5
	Kctd15	H2b1b			Pccb
	Plagl2	Va0d1			Rtcb
	Paf1	Dreb			Myof
	Prickle3	Dnja1			Npc1
	Rfx3	Psd13			Ddb2
	Ccdc30	Dest			Pdk3
	E2f5	Rm23			Isoc1
	Cfap46	Tbb5			Stbd1
	Fam89b	Rs19			Rmnd1
	Qtrt1	Cof2			Rab18
	Taf6l	Mdhc			Sf3a1
	Fam171a2	Ampm1			Nenf
	Lrrc32	C1tc			Prkdc
	C16orf62	Hnrh3			Hacl1
	Htt	Pabp1			Top2b
	Il36a	Ndua5			Prps1
	C7orf60	Mppa			Crp
	Got1	Sytc			Acot9
	Nufip2	Hyes			Tmem2
	Nelfa	Sdf2l			Acy1
	Znf326	Nucb2			Dcps
	Efs	Suv3			Cdc37
	Mt-nd3	Odo1			Ech1
	Crispld2	Dp13b			Ppic
	Cd46	Lrrf1			Myo6
	Ttf2	Dbloh			Fntb
	Ltf	Asna			Smyd5
	Six1	Rl34			Uba3
	Ext1	Mica1			Mon2
	Zbtb17	Ptpa			Mvp
	Alg1	Rn213			Tmed3
	C1orf112	Syic			Cspg4
	Tfeb	Vp26a			Gmppa
	Ppp4r1	Tmm33			Dctn1
	Sh2d4a	Pr14l			Ddx1
	Clc	K6pf			Dsg1
	Mx2	Azi1			Glod4
	C1orf145	Djc10			Vps25
	Tut1	Trxr1			Eif3f
	Cdyl	Vata			Eea1
	Mfn1	Enoa			Smc2
	Pvrl1	Metk2			Tmod3
	Atp7a	Aco13			Sdf2
	Vegfa	Ntf2			Gfpt1
	Cd97	Symc			Cul2
	Qrsl1	Rl23a			Cd9
	Lrrc20	1433g			Mtmr1
	Atat1	Gpdm			Agk
	Rpusd4	Coba2			Opa1
	Fam154a	2001-08-01			Arpc2
	Dok3	Htai2			Dlg1
	Stam	Lpprc			Eif3k
	Wdr78	Sydc			Mlec
	Lsm10	Aldr			Thop1
	Trafd1	Pur9			Ilk
	Osbpl1a	Sptc1			Sugt1
	Prr15	Mk14			Uba7
	Tfb1m	P3h1			Lrp2
	Ceacam4	1433e			Lats1
	Tmem192	Rbgpr			Xpo1
	Zfp64	S10a6			Ist1
	Prepl	Aact			Zfhx4
	Sox10	Dns2a			Snx9
	Tmem106a	Tena			Inf2
	Or8g1	B2mg			Plod2
	Chchd2	Csn6			Fus
	Kcnk6	Al1a2			Erp29
	Ggcx	Pipna			Ube2k
	Mipol1	Kalm			Eif3m
	Sgk3	Hsp72			Tbcb
	Cers6	Src8			Rab6a
	Map3k19	Nduac			Rbbp4
	Cd3e	Tiar			Twf2
	Adamts4	K0090			Actb
	Fmr1	Stea4			Stat6
	Otud6b	Kpym			Ap3b1
	C5	Ndub5			Rsu1
	Plekha2	Mbb1a			Mpi
	Kbtbd4	Ak1c1			Wdr1
	Zg16b	Inp4b			Scrn2
	Elmo1	Ndub7			Ap1g1
	Arl6ip5	Sc24c			Memo1
	Rab2b	Ak1a1			Htra1
	Mrps26	Ma1b1			Kank2
	Gga3	4f2			Snx1
	Xirp1	Smd3			Ap1m1
	Yes1	Cor1b			Cd151
	Diaph3	Tppc5			Klc1
	Mcm10	Rl13			Spcs2
	Hkr1	Lyric			Qpctl
	Thbs3	Psb1			Basp1
	Polr2c	Ppbt			Cap2
	Tmem47	Meth			Dad1
	Ccdc28b	Tfr1			Enpp1
	Znf18	Dopd			Fkbp4
	Dpyd	Spb8			Lamb2
	Hbs1l	Dcnl1			Tsnax
	Cdca7	Tcrg1			Dcd
	Ccnl2	Kat3			Wdr13
	Wdr47	Crel1			Mia3
	Tbc1d4	Hnrpf			Psme4
	Nomo3	Hnrpm			Abcf2
	Rbm15	Actz			Ano10
	Ptpn23	Arly			Tnpo3
	Atrnl1	Serc1			Itpa
	Atp1a2	Epipl			Sarg
	Agrn	Cn37			Tfam
	Txndc15	Rl18a			Ptx3
	Ptpn11	Rs9			Plrg1
	Pbk	Kitm			Atp5e
	Card9	Mtdc			Hmgcl
	Ctdnep1	Cap7			Anxa6
	Spry2	Dyhc1			Scrn1
	Clec4d	Nb5r3			Galk2
	Rexo2	Tif1b			Pclo
	Ltb4r	Uggg2			Rab5b
	Zik1	Vpp1			Apol2
	Spata7	Lamb4			Rock1
	Ppargc1b	Rir2b			Slpi
	Lig1	Tbb6			Rhoc
	Znf33b	Macd1			Acyp2
	Prss57	Catf			Xrcc5
	Pqbp1	If4a1			Grhpr
	Tmem232	Fiba			Extl2
	Chaf1b	Acd11			Bag2
	Tlr5	Sc11a			Trio
	Msh6	Sh3l1			Ap3d1
	Kdm5d	Mfgm			Ptrf
	Nkrf	Gbg12			Rdh11
	Znf236	Ecm2			Gtf2i
	Haao	Maon			Hm13
	Creb3l2	Cacp			Itm2b
	Acn9	Ssbp			Puf60
	Cux1	Prs10			Sf3a3
	Tomm22	Prio			Itpr3
	Alg8	Qorx			Ddb1
	Magee1	Ucri			Pgk1
	Smyd3	Snaa			Gpx1
	Ssfa2	Acph			Etfb
	Znf395	C1glc			Cd44
	Heatr3	Ef1a1			G6pd
	Gtpbp1	Lmbd1			Palld
	Erg	H1x			Ugdh
	Kiaa0100	Galt2			Smc1a
	Cdca2	Ma2b1			Sun1
	Sp4	Pglt1			Pdia6
	Snap47	Tm231			Nqo2
	Vps39	Dnjc3			Aspm
	Extl1	Syrc			Arl3
	Nol10	If16			Nceh1
	Stk38l	K1967			Rab2a
	Cox15	Echd1			Hdhd1
	Znf283	Ctro			Cubn
	Coro1b	Sem3e			Eci2
	Pdgfa	Kbp			Nxn
	Fbxo4	Tf3c1			Myo1e
	Atp6ap1	Rl36			Rab8a
	Tcra	Rl15			Psmd9
	C6orf141	Kat1			Dcxr
	Rad54l2	Grp78			Ssrp1
	Fam118b	Rssa			Dpp4
	Dytn	Emal3			Tmed5
	Fbxo45	Prdbp			Mtmr6
	Tsen34	Kinh			Tln2
	Ostm1	Potee			Cav2
	Ndn	Catk			Srrm1
	Dhdds	Ck067			Prosc
	Zyg11b	Rs13			Otub1
	Fam35a	If2a			Blvrb
	Smu1	Rl30			Dctn3
	Man1a2	Cbpd			Ermp1
	Dnah2	Gdia			Acsl4
	Cdc20	Trxr2			Myo1b
	Samhd1	Dc1i2			Ggh
	Nubp1	Uh1bl			Etfa
	Hlx	Rs2			Vps4b
	Slc25a25	Toip1			Stt3a
	Tbc1d22a	Chm4b			Pnpt1
	Ctdspl2	Pdli1			Fkbp9
	Tmsb15a	Rs27			Arl8b
	Sel1l	T126a			Sec13
	Igkv2-30	Tcpa			Macf1
	Per3	Nif3l			Ppig
	Nkiras2	Pcyxl			Eif3h
	Ddx26b	Rm43			Cryl1
	Apoa1bp	Atpk			Cnpy2
	Rabgap1	Ch055			Prdx4
	Mthfd1	Celr3			Semg1
	Chd2	Stml2			Trnt1
	Ints1	Co5a1			Ddx3x
	Hsfx1	Arhl2			Flii
	Pank1	Ctnb1			Snx18
	Itih3	Pgfra			Pls3
	Galnt7	Sap3			Rcc2
	Tspan31	Ro60			Rdh10
	Shpk	Pgrc1			Ykt6
	Krt1	Pp1g			Wfs1
	Rab22a	Np1l1			Atp5h
	Amdhd2	Prs7			Ilf3
	Bclaf1	Rla2			Gpc6
	Il12rb1	Scot1			Rer1
	Scyl1	Rfa2			Cyr61
	Elmod3	Mp2k2			Cope
	Mfsd3	Psa5			Ghitm
	Whammp3	Fbx2			Arsa
	Capn3	Fkb11			P4ha1
	Dmtf1	Psd11			Gpx4
	Lama1	Ef1b			Usp9x
	Fanca	Pgs2			Pmm2
	Xaf1	Tbc24			Srp19
	Ik	Txd17			Vdac2
	Arl5b	Dp13a			Gmppb
	Josd1	Tebp			Lamc1
	Wdhd1	Pdia1			Dnmt1
	Habp2	1a02			Syk
	Wdr83	Actg			Pygb
	Nxt2	Cah13			Epdr1
	Oscar	Ndua9			Vat1
	Chmp2a	Cx4nb			Cnn3
	Aurka	Dhe3			Luzp1
	Lilrb4	Atpd			Fryl
	Htatip2	Wash7			Ighg1
	Zfand1	1a11			Parp4
	H2afy	Ts101			Iah1
	Abtb1	Rfip5			Tnpo2
	Shisa4	Ibp3			Pcsk5
	Polr2l	Coea1			Rgn
	Acacb	K1c18			Arl11
	Vgll3	Nltp			Aimp2
	Glra2	Cs066			Bst1
	Nphp3	Ch3l2			Cald1
	Shank2	Rims2			Pgm5
	Arhgef2	S61a1			Tfg
	Cyfip2	Ctl1			Vps29
	Arhgef1	Dcup			Ptgis
	Rell1	Minp1			Lsm3
	Irak3	Nucl			Clip1
	Pgrmc2	Dd19a			Nfkb1
	Sltm	Rs15a			Copg1
	Prkcdbp	Smd1			Vamp7
	Map4k2	Rm49			Ptgr2
	Poldip2	Psb3			Carm1
	Dcdc1	Djb12			Cd109
	Mpc1	Kcc2d			Lman1
	Pbdc1	Rs29			Sf3b1
	Urb1	At2a2			Xpo7
	Asrgl1	Kpra			Cul4b
	Cdkn2aipnl	Ubql2			Esyt2
	Marveld2	Al1b1			Map4
	Fzd1	Cah5b			Sfxn1
	Cmtm4	Tatd1			Lamb1
	Zbtb40	Cbpa4			Rap2b
	Ca4	Pai1			Pvrl2
	Srcap	Kcd12			Bub3
	Fam26e	Cc85a			Umps
	Tpcn1	Nnrd			Plp2
	Kif4a	Np1l4			Arf5
	Zscan16	Npl4			Srpr
	Hdv103s1	Ergi1			Ap2s1
	Tube1	Rl18			Tgm2
	Anks3	Rl11			Pdia4
	Cacna2d1	Nagab			Pprc1
	Gtf3c1	Ima3			Chid1
	Ccnc	Gnas2			Psmd6
	Thoc7	Tbb4a			Erh
	Numb	Cytb			Tmx1
	P2ry12	Ndus7			Pgam1
	Necap1	Px11b			Wbp2
	Alg14	Khdr1			Negr1
	Nom1	Csn8			Tpbg
	Bdp1	Vatb2			Setd7
	Sprr2g	Desp			Srsf7
	Jade1	At2l2			Nomo2
	March6	Ub2l3			Tkt
	Rnf175	Rl22			Uso1
	Tsen54	Mot1			Snx3
	Tcf12	Clus			Api5
	Cdpf1	Ssrb			Ccny
	Proser3	Cor2b			Vapa
	Nktr	Cox2			Rpe
	Mbd1	Ndub9			Ehd2
	Mybpc3	Rhg17			Sumo1
	Taf12	Plbl1			Grem1
	Fpgt	Spde5			Cpne3
	Npas3	H2ay			Dip2b
	Lenep	Atla3			Chkb
	Tubb3	1433s			Lmna
	Clptm1	Pur2			Clic1
	Pde8a	Ita2			Pak2
	Kdr	Sap			Vasp
	Smarcd3	Rask			Plin3
	Tmem56-rwdd3	F162a			Nagk
	Srek1ip1	Tpsn			Stat2
	Nt5c	Syyc			Nit1
	Arhgdib	Sywc			Ppil3
	Znf586	Ranb3			Tmed2
	Leo1	Sgmr1			Brox
	Aasdh	Isk5			Dhx29
	C6orf120	Co8a1			Eif3j
	Ints8	If4g1			Pls1
	Apbb1ip	Impa3			Crkl
	Stx6	Goga4			Ap2a2
	Alkbh6	Br44			Gar1
	Hnrnpf	Enoph			Cd63
	Wdr36	Pa24a			Wdr61
	Gpat2	Faaa			Tmx3
	C17orf62	1433z			Nsf
	Morf4l1	Clca			Dpp8
	Fam104a	La			Rab23
	C9orf135	Sh3l3			Eif3a
	Znf184	Clc3a			Fubp1
	Tnfaip8	Ci142			Tom1
	Slc38a10	Hnrpd			Srsf2
	Clec12a	Dhsa			Myadm
	Dock10	Psa2			Lmcd1
	Luc7l3	Rl7			Anxa4
	Klrf1	Hnrpk			Plcg1
	Gcnt1	Tcpz			Apoa1
	Rtp4	Nntm			Cul1
	Cog8	Ipyr2			Adpgk
	Bhlhe22	Ubp7			Bbs7
	Uprt	Tp53b			Tbcd
	Cd200r1	Tspoa			Raly
	Epha5	Sem5b			Crk
	Taf9b	Vp13c			Exoc4
	Plekhj1	Rla1			Hdhd2
	Panx2	Csn1			Plec
	Fads2	Mesd			Nudt3
	Arfgap1	Rs7			Reep5
	R3hdm4	Tm87a			Uap1
	Plekhm2	Dhb12			Cyb5b
	Piezo1	Nduaa			Prg4
	Psmd10	Radi			Pter
	Frmd8	Ssrd			Strn
	Pus7l	Emal1			Pgp
	Map2k1	Ampn			Ubl4a
	Cdc45	Aknd1			Cdk13
	Glyatl1	Pura2			Ppt1
	Eps8	Ita5			Sfxn3
	Pphln1	Rs11			Flnc
	Polr2m	Iqga1			Osgep
	Akip1	Tcpq			Bpnt1
	Rps27a	Ndua2			Cpne1
	Dph5	Npm			Vps36
	Eya3	Copb			Set
	Mrpl33	Ppr21			Galns
	Hnrnpdl	Stabp			Pea15
	Prdm16	Rl32			Flot1
	Rpf1	Dus3			Nub1
	C2orf48	Pth2			Rbbp5
	Mapkbp1	Tnc18			Wdr5
	C11orf57	Pgca			Pspc1
	Stard5	Lich			Vamp3
	Ubap1l	Typh			Mecr
	Kbtbd11	Dnjc5			Vta1
	Clcn4	Glgb			Nucb1
	Ccr9	1a68			Rad50
	Kif19	Kdel2			Timp2
	Nadsyn1	Tp4a2			Park7
	Appl2	Rl24			Map1a
	Ndrg4	Rs20			Hebp1
	Pyhin1	Rhg30			Gstm3
	Tyw3	Cnrp1			Phb
	Rdh16	Sptn4			Coasy
	Lamtor3	Mblc2			Oat
	Bst2	Tm165			Ptk7
	Man1c1	F158a			Surf4
	Dip2c	Cybr1			Myh14
	Tead3	Qcr8			Vps45
	Ndrg2	Plak			Tpm1
	Hps3	Thio			Xpot
	Snapc4	Nhlc2			Comt
	Nacc2	Sptc2			Hexa
	Men1	Trfl			Gys1
	Ankrd27	Echd3			Nasp
	Hspa5	Odpb			Rbmx
	Mta2	Pgh2			Snx5
	Apol3	Mpri			Ehd4
	Pts	Ruvb1			Sae1
	Fmo1	Prof2			Pnpo
	Cdc123	Rent1			Arpc4
	Lcn1p1	Mrp6			Nptn
	Frg1	H2a1c			G3bp1
	Rangap1	Adro			Ptbp1
	Rbm23	Gslg1			Praf2
	Rabggtb	Tsn3			Nampt
	Ctf1	Crac1			Siae
	Slc12a6	Sng1			Stx7
	Ralgds	Swp70			Syne2
	Shisa6	Ark72			Bzw2
	Mmadhc	5ntc			Psmd4
	Exo5	Ceru			Sec63
	Tardbp	Ndus2			Cd276
	Mybbp1a	Ttl12			Apod
	Tnfrsf12a	Php14			Rab1a
	Nlrp12	Tm9s2			Numbl
	Mapt	An36c			Rab21
	Atl1	Pkcb1			Hspb6
	Riok2	Sprc			Snrpa
	Map7d1	P5cs			Apoa4
	Ears2	Cb018			Ganab
	Lin54	Arp5l			Rheb
	Tshz3	Txnd5			Copa
	Ifi44	Pfd2			Mcu
	Znf207	Ma2a1			Celf1
	Arhgap6	At131			Faf2
	Clec4f	Ml12b			Edf1
	Cryz	Erg7			Parp1
	Fadd	Mdhm			Ubxn4
	Dhtkd1	Etfd			Immt
	Nfyb	Uqcc			Nrp1
	Cdk10	Hem2			Egfr
	Ppa2	Pabp4			Idh3g
	Gp1bb	Bgal			Cog5
	Tmem39b	2011-09-01			Qser1
	Pigs	2008-09-01			Idi1
	Serp1	Arp2			Eif3c
	Lias	Muta			Paip1
	Ipo13	Ita11			Rbms2
	Lepre1	Cf010			Nnmt
	Pdha1	Hxk2			Hddc2
	Aktip	Lma2l			Nudc
	Bcap31	Tcph			Rock2
	Nploc4	Dyl1			Tpm3
	Foxh1	Ef1d			Srp14
	Cd2ap	Tpd54			Cant1
	Nat6	Aofb			Ctgf
	Tomm7	Gt251			Taf1
	Krt6b	Cox41			Ttc37
	Cd244	Co1a2			Vapb
	Nek5	Atpg			Fbn1
	Tollip	Baf			Megf8
	Rab3b	Aapk1			Pkn1
	Smg5	Pp1r7			Lmod1
	Lrrc4b	Ef1g			Vps18
	C6orf89	Hnrh1			Anxa7
	H6pd	Kad1			Fgf2
	Arl8a	Ltor3			Mgst3
	Slc25a34	Pag15			Tmed4
	Sec61g	Sucb1			Pgs1
	Brd8	Xrp2			Uchl3
	Znf699	Prs4			Mtmr9
	Plxna2	Tcpd			Cd81
	Ensa	Cbpm			Nudt5
	Zscan18	Ipyr			Xrcc6
	Pomgnt2	Enog			Dctn2
	Ss18l2	Al1l2			Tpp1
	H1fnt	Nduv2			Aldoc
	Jmy	Calx			Ilvbl
	Enthd2	Qcr2			Herc4
	Vps26b	Nedd8			Rcn3
	Chst3	Ada2a			Clcc1
	Smarca2	6pgd			Mpp6
	Scai	Cad13			Gns
	Stk35	Gsh0			Eif3l
	Themis	Dnjc8			Actn1
	Xrra1	Pyc			Strn3
	Retsat	Sbp1			Abce1
	Ppp2r1a	Ncoat			Hmgb2
	Wdr34	Ubp14			Ddx6
	Mterf4	Tolip			Hsdl2
	Znf584	Bt2a1			Capg
	Trim44	Vatc1			Paaf1
	Sptlc3	Rpb2			Galm
	Crot	H2b1l			Stat1
	Ppm1k	Pp2ba			Cbr3
	Best1	Dhak			Ntan1
	Nudt10	Cpped			Blmh
	Prpf39	Asc			Qsox1
	Mien1	Hacd3			Tram2
	Myo7a	Vp26b			Rpn2
	Gpn2	Mppb			Cpt2
	Tom1l1	Bmp3b			Manf
	Rwdd1	Tba4a			Vps35
	Rexo1	Ipsp			Lemd2
	Mtmr11	An32b			Cmc1
	Wdr64	Ncpr			Upp1
	Zmym2	Gdir1			Sfpq
	Pld5	Spre			Myh9
	Mcee	E41l1			Gpx8
	Dennd3	Syac			Ctr9
	Pdcd10	Rm09			Rasa1
	Pla2g3	Sort			Grb2
	Gcsaml	Cfah			Hspb1
	Upf3a	Aofa			Tsn
	Gsg2	Ndua4			Ahsa1
	Cplx3	Ats1			Fnta
	Smad5	Fkb1a			Ipo4
	Hsd17b10	P3h2			Magt1
	Kif21a	H12			Rab5a
	Trappc4	Bglr			Pura
	Nek7	Maom			Flna
	Sqle	G6pi			Creg1
	Tmem123	Pges2			Hmox1
	Fkbp8	Vas1			Bcat2
	Krt78	Ahnk			Cd47
	Rnf214	Cd166			Bola2
	Mnda	Rl28			Ckap4
	Znf211	Endd1			Rrbp1
	Cct6b	Gbb2			Qki
	Ak1	Hnrpr			Cygb
	Sclt1	Arp10			Csrp1
	Tec	Tens1			Bdh2
	Sh3pxd2a	Tagl			Rala
	Nt5dc2	Pgm2l			Cryab
	Ankrd12	H31			Hint1
	Fam8a1	Catb			Senp8
	Gpr65	Fyv1			Phkg2
	Mgme1	Lypa2			Ide
	Usp3	Hnrdl			Sart3
	Spag17	Acbp			Hdac2
	Tmem154	Rs18			Impa1
	Spon2	U5s1			Farp1
	Pde7b	Nu155			Cstf3
	Fcgr3b	Clcb			Adk
	Cdk19	S23ip			Ncln
	Kcnmb3	Clpt1			Mtpn
	Amz2	G3pt			Acadm
	Recql	Cegt			Tram1
	Helb	Aakg1			Gcc2
	Rlf	2005-09-01			Mpv17
	Cct8	Actc			Mms19
	Znf555	Serc			Dnpep
	Phlda3	Pa1b3			Akt1
	Mical3	B4gt5			Pcbp2
	Ring1	Chm1a			Pepd
	Rpain	Gcn1l			Arl1
	Plekhg3	Bl1s1			Tmx4
	Mrs2	Crbs			Cirbp
	Pcdha3	Dylt1			Rtn4
	Neurl4	Taxb1			Fhl1
	Hla-drb3	Spry7			Psme1
	Enpep	Acpm			Myo1d
	Khsrp	Pfd4			Actn2
	Atp8b3	Ofut1			Cap1
	Cd300lb	Scrb2			Isoc2
	C4orf32	Big2			Kif27
	Ttc19	Csn2			Pgk2
	Grtp1	Dnja2			Wdr26
	Plekha5	Tm9s4			Gnai3
	Fam21c	Tadbp			Npc2
	Acbd5	Can1			Rab10
	Tgm3	Co6a2			Dpm3
	Pole4	Ppp6			Lin7c
	Pnpla2	Shps1			Uaca
	Clec3b	Plbl2			Rac1
	Cep104	Fabph			Sun2
	Tor1aip1	Idhp			Thy1
	Rabif	Sahh2			Nqo1
	Trav36dv7	Gnpi2			Arl2
	Cnot11	Hnrpc			Ggt5
	Fgfr1	Adt2			Ddx54
	Igha1	H2b1j			Psmd1
	Khnyn	Acsa			Plcd1
	Abhd14a	Pdc6i			Smc3
	Sys1	Myg1			Manba
	Znrf1	Nud19			Cul3
	Pcif1	Ndub3			Dhx15
	Hbe1	Ck054			Gstm1
	C14orf79	Pical			Numa1
	Naif1	Rir2			Mylk
	Trpm3	Opla			Snx6
	Gdpd1	Mtssl			Rcn1
	Lrrc75a	Pgtb2			Prdx6
	Kiaa1551	Lrc47			Preb
	Znrf2	Pyrd2			Eif3e
	Rps2	Dpp2			Cav1
	Fbxo17	Erln1			Uchl1
	Shf	Hs74l			Gpnmb
	Dennd1b	Imdh2			Keap1
	Cass4	Sysc			Dut
	Taok2	Smrc2			Mogs
	Hagh	Psb4			Pdxk
	Tspan4	Kapcb			Dnm1l
	Gpr157	Thil			Ttc38
	Art5	Scam4			Lsm12
	Pigq	Ula1			Myh10
	Dennd6a	Pmge			Acly
	Kiaa0895l	Ef2			Stom
	Ccdc33	Acatn			Naa50
	Mdh1	Grpe1			Sdk2
	Mapre2	Psb8			Hbb
	Hax1	3hidh			Comp
	Brd1	Fpps			Hydin
	Tmem38a	Syfb			Zw10
	F10	Qcr9			Xirp2
	Lox	Zmy11			Rab32
	Srsf8	Ki13a			Nit2
	Cacna1c	Rnas4			Cenpf
	Galnt11	Roa1			Fscn1
	Hist2h2ab	Syq			Cab39
	Tctn2	Nb5r1			Lrp3
	Rps7	Apt			Dock5
	Prdm14	Lypl1			Vdac3
	Sh3glb2	Hsp7c			Mtx2
	Ccdc91	Rt27			Ddx60
	Kif2a	Prs6b			Myl9
	Dcaf11	At1b3			Ralb
	Ncf1c	S39ae			Twf1
	Pola1	Chste			Skp1
	Or2a4	Hpca			Cuta
	Arrb1	Ctl2			Efhd2
	Gnl2	Pr40a			Cul5
	Mthfsd	Tnks1			Rragc
	Aga	Anx11			Gga1
	Ociad1	Sucb2			Ppil1
	Fam175a	Tba1c			Rap1b
	Thap11	Epcr			Ube2z
	C15orf39	Lmbd2			Psmd8
	Acox3	Fril			Tbca
	Crnkl1	Ma2c1			Dmd
	Klhl36	Syhc			Ola1
	Cpe	Psd12			Stx12
	Igfbp5	Ifm1			Acap2
	Znf541	Psa6			Plod3
	Ptdss2	Glna			Cox5b
	Znf69	Spb6			Epha2
	Nphp1	Cf211			Fis1
	Fam50a	Kad3			Arf6
	Etv2	Aka12			Mif
	Rbp1	Rl3			Usmg5
	Alg12	Aspg			Pds5a
	Zc3h6	Ndua8			Grn
	Actr1a	Rs26			Lmo7
	Ccdc102a	Mob1b			Gmpr2
	Rab11a	Djc13			Lxn
	Znf131	H4			Anxa5
	Slfn11	Scpdl			Phb2
	Rnf167	Cp1b1			Mgst1
	Kdelr3	Stam1			Ipo9
	C5orf30	F210a			Letm1
	Gorab	Ikip			Sf3b3
	Stil	K6pl			Mcts1
	Gypc	Pyr1			Enah
	Apcdd1l	Baip2			Sdc2
	Dap3	Gogb1			Ap3s1
	Ebf2	Osbl8			Cbr1
	Rwdd2a	Goga2			Fyco1
	Cdv3	Rtc1			Cotl1
	Ggta1p	Sias			Dctd
	Gsc	Chm2a
	Ccne2	Sc22b
	Limk1	Cg025
	Tstd3	Ndua6
	Bend3	1a31
	Lancl1	Nxp20
	Arap2	Hnrl2
	Ppp2r5c	Ero1a
	Ctage5	Rd23b
	Helz2	Ubp33
	Serpinb9	Fbln3
	Lrrc7	Rl36l
	Vtn	Pepl1
	Eif2s2	Ce290
	Agap9	Egln
	Nupr1	Echb
	Ndst3	A1at
	Prkar2a	Rbsk
	Pbxip1	Pp1a
	Desi2	Adt1
	Ms4a1	Imb1
	Hnrnpa2b1	Cp058
	Rab33b	Agm1
	Kcne1	Odo2
	Tmem40	Lipb1
	Adap1	Rl35
	Kif22	Lanc1
	Nudcd2	Xpp3
	Pias4	Mrp3
	Adat1	Djc11
	Kiaa0408	Sera
	Cops3	Fila2
	Fam32a	Roa3
	Txn	Coba1
	Capn1	Gna1
	Rcc1	Gcp60
	Spata22	Pcp
	Slc34a3	Dc1l1
	Mettl15	Cc88b
	C1orf105	Cthr1
	Asf1b	Uk114
	Dscc1	Tm111
	C21orf33	Rl21
	Adar	Al3a2
	Znf860	Ubp15
	Nosip	Rm37
	Tomm40l	Neur1
	Irx5	Fuco
	Dlg5	Gds1
	Sh3pxd2b	If6
	Xrcc4	Stab2
	Pcdhgb5	At2b1
	Knstrn	Nips1
	Ndufb7	Nhrf1
	Plin4	Ndus6
	Muc5b	Fnd3b
	Plvap	Itb5
	Fcn1	Dhsb
	Rnf169	Mst4
	Stk25	Fuco2
	Pex3	Hsp71
	Fam49a	Vatg1
	Galnt5	Gbb4
	Hck	Tsp1
	Ppp2r3a	Rl35a
	Ms4a4e	1b53
	Phlda2	Pipnb
	Tpm2	Tim44
	Spi1	Ak1c2
	Hide1	Catd
	Znf316	Nadl2
	Asmtl	Mep50
	Cdkn2a	Ugpa
	Trpt1	Anm5
	Tarm1	Psde
	Dennd2c	Adsv
	Dcdc2	If4e2
	Rem1	Jip4
	Ifi35	Gors2
	Snrpa1	Atpb
	Adcy3	Rs5
	Bcorp1	Scam2
	Tomm34	Adas
	Cmpk1	Ca2d1
	Ighv3-23	Psb6
	Tmem5	Pgtb1
	C16orf58	Estd
	Ppfia4	S10a4
	Cd80	S10ab
	Usp9y	Lyag
	Ccar1	Ct030
	Abracl	Cah2
	Stxbp3	Ssrg
	Ggact	Marcs
	Calml4	Ar6p1
	Lrp12	Rl26
	Slc30a8	Arc1b
	Parl	Mprd
	Rpl29	Hs90a
	Rabep2	Rl5
	Mfhas1	Csn4
	Mrvi1	Sqstm
	Ociad2	Ubp48
	Nfatc3	Ndk3
	Ndufaf7	T106b
	Pask	Angl2
	Gemin7	Csk22
	C2orf68	Skiv2
	Kitlg	2007-09-01
	Hsp90ab4p	Prp19
	Rad21	Glym
	Prex1	Hp1b3
	Trim4	Tthy
	Tgfb1i1	Lpp1
	Defa3	Vigln
	Prmt7	S12a4
	Rnf34	Bcs1
	Rab24	Nhlc3
	Lysmd4	Finc
	C11orf48	Plst
	Rtca	Thtm
	Bai3	Fumh
	Lipe	8odp
	Cntrob	Galt1
	Klk15	Syim
	Mef2bnb	Ma2b2
	Chmp4a	Ndus5
	Glis3	Sode
	Trpv2	Spee
	Slc25a20	Rs21
	Dnaja2	Rt15
	Igf2	Mvd1
	Dcbld1	1b59
	Kmt2b	If2p
	Evi2b	Vinex
	Hnrnpa0	Ppal
	Hla-dmb	If4g2
	Anapc5	Rs3
	Sybu	Plxa2
	Cyb5r4	Ptn11
	Gatc	Ino1
	Msn	Gdib
	Efna3	Pacn3
	Gtf2a2	Pdip2
	Dnajb4	Hnrpu
	Ccnyl3	Leg3
	Eif1b	H15
	Fam193a	Itav
	Picalm	Rl31
	Bhmt	Rs14
	Stx18	Vkor1
	Znf687	Rs28
	Itgal	Hem6
	Fam177a1	Rl14
	Itga9	Snapn
	Crocc	Cof1
	Mef2c	Rs10
	Sipa1l2	Gst2
	Nhsl2	Hnrl1
	Gja8	Nakd1
	Ccdc109b	Pls4
	Psmc5	Glsk
	Coq7	Ndkb
	Exoc5	Sng2
	C20orf194	Vate1
	Sesn3	5ntd
	Mroh5	T4s1
	Ptx4	Ru2b
	Trim5	Rfa1
	Hspd1	Psd10
	Fam206a	Exos4
	Zdhhc21	Mp2k3
	Srpk3	Titin
	Mcm7	Hxk1
	C22orf39	Acoc
	Nup54	Psa
	Nrsn2	Psa4
	Soga3	Sc24d
	Or11h6	Basi
	Itgbl1	Lcap
	Kdm1a	Samp
	Sestd1	Can2
	Isyna1	F10a1
	Oxa1l	Prs8
	Thoc1	Lis1
	Samd8	Arm10
	Stim1	Ub2d2
	Nup107	Tmm43
	Glt8d1	Mpu1
	Stat5b	Neul
	Hmgn2	Drs7b
	Ston2	Tm109
	Reep6	Thic
	Prss3	Aatm
	Stag1	U520
	Chrna1	Glu2b
	Mlc1	Nsf1c
	Tex264	Dyl2
	Tshb	Mk03
	Klk9	Cip4
	Trub1	H2a1
	Kars	Rt22
	Znf470	Sdf1
	Nudt2	Capr1
	Mrpl53	Ima4
	Babam1	Met7a
	Cabp5	Pgrc2
	Polk	Nips2
	Rps16	If2b
	Sema3a	Cp20a
	Fam186b	Skt
	Tanc1	Rcl
	Zcchc7	Sylc
	Taf5	Phocn
	Kif1b	Bgh3
	Atp5c1	Mia
	Fam69a	Elob
	Pknox1	Kt3k
	Cmc4	Tom40
	Mtmr2	B4gt1
	Ubac1	Srbs2
	Gusb	Serph
	Terf1	Xpp1
	Eid3	Tmm11
	Fam169b	If4e
	Tiam2	Lypa1
	Nlrp1	If1ay
	Rap2a	Mot4
	Tp53rk	Rl6
	Lman2l	Xpo2
	Zc3h11a	Lpp3
	Dcun1d4	Rcd1
	Spns3	Kap2
	Slc14a1	Kap0
	Ralbp1	Tm9s1
	Lin7a	Fcl
	Trmt10c	Vime
	C8orf49	Ubc9
	Mrpl54	Dyst
	Znf346	Trfe
	Iws1	Calm
	Zfp91	Vkgc
	Znf804a	Spb9
	Kif13a	Sorcn
	Cbs	Syg
	Ppp1r13b	Cy1
	Stat4	Cs010
	Ncapg	Csn5
	Pcgf6	Pcy1a
	Klkb1	Prs6a
	Brinp1	Echm
	Tax1bp1	Dpyl2
	Clasrp	Ndus8
	Slc26a3	Adhx
	St3gal2	Rm46
	Mrpl12	Mk01
	Sec11a	Matn3
	Trem1	F16p1
	Ecd	Co2a1
	S1pr3	Rs8
	Shq1	Plap
	Atox1	If4g3
	Pde5a	Plxb2
	Tdg	Pdc10
	2006-09-01	Hpbp1
	Exosc6	Ctna1
	Ctps2	Ocad1
	Pklr	Lysc
	Fen1	Tim50
	Crat	Ythd3
	Znf280c	Rla0
	Trrap	Tcpb
	Odf3	Tctp
	Fundc1	Tbb3
	Crtc2	Cn166
	Smurf2	Ei2ba
	Nefm	Tgt
	Inhba	Tm14c
	Clip2	Kpca
	Far1	C1qt3
	Znf526	If4a2
	C11orf65	G3p
	Nfkb2	Macf4
	Atxn7l3	Rs12
	Ptpn9	Elmd2
	C2orf88	Hsp74
	Sh2d7	Caza2
	Son	Tpm3l
	Serinc5	Uggg1
	Entpd7	Goga3
	Pxdc1	Cilp1
	Cadps2	Pcx3
	Cdh1	Es1
	Rps26	S10ad
	Eaf1	Myl6
	Camkmt	Nua4l
	Tubg1	Goli4
	Kctd3	Hcd2
	Ptpn1	Emal2
	Cst7	Tulp2
	Mlk4	Dyh10
	Znf705g	Xylk
	Asb6	Lacb2
	Cyp24a1	Rs4x
	Dolk	Al3b1
	Nbn	Znt7
	Ptpn18	Rs16
	Sec61a1	Arf1
	Nlrp9	Rini
	Spryd4	Ppgb
	Rfxap	Tx1b3
	Slc35f3	Fxl19
	Sfmbt1	Sp16h
	Fam160a2	Maox
	Ncoa2	Hyep
	Mansc1	Nica
	Tbce	Lrit1
	Has2	Asm
	Gtpbp10	Ck068
	Cspp1	Sodc
	C9orf3	Synem
	Tigd2	Yes
	Txn2	Psb10
	Apcs	Hpln1
	Rrp12	Prof1
	Slfn12	Odp2
	Fam98a	Psa1
	Ankrd30b	Fah2a
	Ptk2	Amrp
	Ier5	Sam50
	Triap1	Roaa
	Hjurp	Tm9s3
	Tnfsf13b	Odpa
	Iscu	Sodm
	Qil1	Ltor1
	Wdr24	Copd
	Cpsf6	Cybp
	Ubxn7	Ccd80
	Calr3	Rl7a
	Col6a5	Ru17
	Ece2	Fa98a
	Rbm34	Sptn5
	Ccdc47	Cpns1
	Tfip11	An32e
	Rftn1	Got1b
	Slitrk4	Ru2a
	Ifng	Tbc15
	Clp1	At5f1
	Traf1	Rl37a
	Prdm8	Mccb
	Cops7a	Pfd3
	Mki67	Mica2
	Rpgrip1l	Strum
	Arhgef37	Dhpr
	Eml6	Ccd73
	Arhgap20	Pgcp
	Arsi	Leg1
	Cftr	Ppce
	Rad51b	Ch3l1
	C1orf86	Mtnd
	Dcp1a	Mp2k1
	Lancl3	Cadh1
	Adamts3	Pacn2
	Gnb1	Abhda
	Nipsnap3a	2009-09-01
	Dmkn	Cxa1
	Dusp13	Ecm29
	Znf35	K1239
	Ndufs6	Nu205
	Impact	Tcpg
	Ino80e	Big3
	Amd1	Hemh
	Jph2	Co5a2
	Psat1	Catl1
	C9orf62	Ampm2
	Nudt18	Arp3
	Mt-atp8	K0408
	Rdh5	Djb11
	Psme3	Ybox1
	Cthrc1	Rsmb
	Lmtk2	Rl27a
	Ebpl	Rl8
	Cd79a	Vma5a
	Elac1	Rl19
	Knop1	Arfg3
	Smim19	Spp2a
	Grm3	Ub2v1
	Fzd6	Rl12
	Prox2	Smd2
	Cit	Cisy
	Trove2	Gtr1
	Txlna	Bap31
	Tmem245	Hnrll
	Anxa3	Sdos
	Daxx	Ch10
	Ctnnb1	Niban
	Patl1	Pur8
	Prpf4b	2002-09-01
	Rsl24d1	Psb2
	Tagap	Scmc1
	Cyp19a1	Sc61b
	Znf101	Tbl1r
	Sugct	Lonm
	Kiaa0391	Dyh2
	Ptov1	Nduad
	Akap4	Ampl
	Csnk1e	Cor1c
	N6amt1	Taldo
	Mis12	Bach
	Dscaml1	Elav1
	Armcx4	Hs90b
	Pcsk6	Ssra
	Gpr125	Cntp2
	Fnip1	S38a2
	Iqca1	1433f
	Kdm2a	Pnph
	Svil	Sqrd
	Mier1	Stxb5
	Epg5	Ruxgl
	Cldn11	Hppd
	Cyp27a1	G6pe
	Dnaaf2	Se1l1
	N4bp2l2	Phs
	Scnn1g	Adppt
	Armc4	Csn7a
	Cd84	If2g
	Pde11a	Ndus1
	Traf6	Cyc
	Tacc1	Cgl
	Krt10	Co6a3
	Pth2r	Sepr
	Plxnb2	Tsn8
	Hint2	Suca
	Atrip	Ruvb2
	Cnnm2	Nduba
	Thoc3	D19l1
	Myh1	Zbt17
	Sec14l3	Pgta
	Ep400	Cayp1
	Stk33	Rb3gp
	Hint3	Itb1
	Btbd11	At2b4
	Btn3a1	Pyrd
	Prkaa1	Frih
	Urgcp	1433t
	Cbx7	Dyh12
	Fbxo22	B3ga3
	Mmp2	Hnrpl
	Mcam	Pith1
	Pycr1	Kcrb
	Polr2a	Cytl1
	Igbp1	Anm1
	Cyp7b1	Jcad
	Sytl3	Sycc
	Gsta3	Ofut2
	Rprd1b	Pckgm
	L3mbtl2	Anag
	Micu1	Tm214
	Tmco3	Pdli4
	Rassf2	Tbb4b
	Ikbke	Clh1
	Cyth1	Psa3
	Lsm14b	Lgul
	Crbn	Tagl2
	Zc3h14	Ssdh
	Potef	Daf
	Psma2	Kapca
	Arfgef1	Rm03
	Ngef	Rs6
	Chmp6	Cp080
	Lipi	Dira3
	Gpr179	Tf65
	Rab11fip1	Kcy
	Sh3kbp1
	Bet1
	Kdsr
	Wdr4
	Usp11
	Haus7
	Lgalsl
	Iqcd
	Pcdhgc3
	Akr1c2
	Nutf2
	Tmc4
	Pop5
	Myl12a
	C16orf92
	Fbxo2
	Hdac9
	C20orf24
	Rfx5
	Taf7
	Slc45a2
	Ccdc154
	Gucy1a2
	Actl6b
	Inpp4a
	Trim26
	Atp6v0a1
	Caap1
	Pfdn2
	C5orf24
	Dnttip2
	Ina
	Synpo
	Jund
	Ulk1
	Tp53i13
	Stx16
	Znf761
	Rnh1
	Filip1l
	Mrps31
	Syne3
	Srcin1
	S100a13
	Afm
	Klrb1
	Smim24
	Thap9
	Tcrbv13s1
	Haus2
	Eif4e2
	Spa17
	Taf10
	Prkab1
	Spg21
	Ufd1l
	Tbx10
	Cdcp1
	E2f3
	Sdc4
	Ints6
	Nmnat3
	Col4a2
	Add3
	Polr1d
	Papd5
	Sema3f
	Cfl1
	Etv3
	Pes1
	Dclk2
	Rpl7
	Asphd2
	Rbm45
	Hbm
	Skiv2l
	Maged4
	Setx
	Trim37
	Ocln
	Tbpl2
	Fbxw11
	Amn
	Zbtb20
	Dnal4
	Map9
	Cpamd8
	Pitpnm1
	Commd2
	Pik3c3
	Atxn10
	Fam200b
	Katna1
	Adcy9
	Slc44a4
	Stk10
	Cdadc1
	Ankrd29
	Psd
	Rcn2
	Hoxa10
	Btn3a3
	Map3k5
	Nat10
	Sgms2
	Pltp
	Tbc1d12
	Sap30l
	Slit2
	Gzmb
	Obsl1
	Kctd18
	Slc16a3
	Cwc27
	Pdzk1ip1
	Chic2
	Cgrrf1
	Tubb1
	Rnf113a
	Ncs1
	Olfml3
	Tenm4
	Tfe3
	Gle1
	Dvl1
	Mcl1
	Prmt1
	Uevld
	Por
	Sirt1
	Mrpl41
	Gins3
	Dnajc13
	Chka
	Grwd1
	Znf768
	Hmgn5
	Slco6a1
	Cercam
	Rnf185
	Clasp1
	Rbbp8
	Hmcn2
	Narf
	Ulk4
	2002-09-01
	Znf266
	Scp2
	Bcl7c
	Prkrip1
	Mrpl42
	Apc2
	Mapk3
	Pfkfb3
	Hsp90b1
	Paxip1
	Nnt
	Cbr4
	Plin2
	Emc9
	Phf5a
	Srgap3
	C9orf50
	Tnfrsf11b
	Rgp1
	Rplp0
	Suds3
	Myl4
	Akap10
	Rabgef1
	Anxa10
	Fosl2
	Igfbp6
	Murc
	Nabp2
	Zfyve9
	C1orf123
	Gdf15
	Fsip2
	Iglv1-51
	Tsfm
	Ror1
	Agap3
	Frmd4a
	Pex26
	Xpo6
	Rilpl2
	Tmem135
	Tubb
	Znf23
	Mrps7
	Pla2g4c
	Limch1
	Hpgds
	Vim
	Plaur
	Tmem177
	Upf3b
	Bach1
	Tamm41
	Kin
	Ar
	Wdr31
	Aloxe3
	Slc38a3
	Casc5
	Ict1
	Fignl1
	Ccdc171
	Adamts12
	Ptgs2
	Irak1bp1
	Hoxd13
	Tgfb3
	Ctdsp1
	Arhgap27
	Serpina2
	Ebp
	Psmb5
	Bpifb4
	Ankra2
	Spata13
	Eri1
	U2surp
	Gps2
	Rps6ka2
	Vav2
	Grk6
	Gch1
	Slc25a13
	Arhgef7
	Nat1
	Il17rc
	Nup35
	Mkrn3
	Fam78b
	Aldh3a1
	Fam126b
	F13a1
	Tmem184b
	Aco2
	Foxk1
	Hcst
	Ttc40
	Zbtb7b
	C3orf33
	Nrbp2
	Spanxa2-ot1
	Gas1
	Cep78
	Rpl8
	Rab3il1
	Tacr3
	Pigx
	Abhd12
	Serpinf2
	Ap1g2
	Sap130
	Pam
	Otop1
	H2afy2
	Slc22a3
	Sft2d3
	Lig3
	Slc5a10
	Hla-drb5
	Krit1
	Tmem161a
	S100a7
	Arfip1
	Leng1
	Imp4
	Heatr5b
	Wdsub1
	Smarcc2
	P2rx7
	Cacng6
	Spert
	Ylpm1
	Nfat5
	Kcnf1
	Med17
	Ccdc142
	Ebna1bp2
	Traf5
	Coq10b
	Gtf3c3
	Inip
	Nrk
	Znf512
	Gpatch3
	Ache
	Entpd2
	Ntpcr
	Pros1
	Kiaa1109
	Cyp4f11
	Slc6a8
	Agpat5
	Smchd1
	Dpp9
	Mthfd2l
	Birc2
	Armc9
	Smco4
	Zdhhc7
	Gpr155
	Klf16
	Shoc2
	Stk16
	Ndfip1
	Atp9b
	Spc24
	Arhgef11
	Tbc1d1
	Creb3l4
	Hbg1
	Adam19
	Gapt
	Bahd1
	Ptprn2
	Kdelc1
	Slc15a3
	Rsad2
	Smrp1
	Adamts6
	Cd28
	Ssb
	Alcam
	Mageb1
	Col19a1
	Atxn3
	Sh2d2a
	Mtg2
	Tdp2
	Fars2
	Gtpbp3
	Kiaa0355
	Pcnt
	Sorbs2
	Meaf6
	Scyl3
	Kiaa0513
	Ccrn4l
	Ube2v2
	Galnt18
	Ddr2
	Gmpr
	Arhgef4
	Neu1
	Urb2
	Sphk1
	Irf1
	Ubl7
	Arhgap32
	Csnk2a1
	Mettl1
	Ube2o
	Hoxb7
	Tmem70
	Mfge8
	Prkd3
	gene Tssc1 Gfod2 Sh3bgrl3 Epha3 Grid2ip Prdm11 Zfyve28 Stx1b Ski Elmo2 Serpinb10 Aph1a Ly9 Mturn Ahsg Gid8 Gabbr2 Zfand6 Dhx34 Ppm1f Aebp1 Prkcsh Stard3 Napa Ttc4 Setd8 Agfg2 Magea11 R3hdm2 Ccdc66 Notch2 Zscan25 Eya4 Atp2b4 Tmem214 Tmem230 Fcar Sectm1 Rnf149 Rufy3 Ankrd44 Zfyve21 Trbv20-1 Smarcd1 Oas3 Pbx2 Tas2r40 Fam65c Cyp4f2 Avl9 Cltb Mroh2b Ppp2r5e Elmod2 Ctnnbl1 Hps5 Synj2 C4bpa Dnajc24 Tmem…
	Arl5a
	Vangl2
	Dock11
	Cxorf38
	Meis1
	Adal
	Ppp1r37
	Snapc3
	Tceal3
	Spag9
	Cbfb
	Melk
	Igha2
	Zbtb16
	Cstb
	Kcnc1
	Nfkbia
	Ermap
	Ccp110
	Rac3
	Gnn
	Tfcp2
	P2ry13
	C16orf45
	Vwa3b
	Cdy1
	Skor1
	C19orf10
	Mpp2
	Fam214b
	Jag1
	Prdm13
	Heatr9
	Vcan
	Selt
	Atad5
	Vgll4
	Glyr1
	C19orf43
	Sh3d19
	Stx8
	Fnbp4
	Znf425
	Xxylt1
	Pdha2
	Oma1
	Ndufa4l2
	Capns1
	Ppp1r14b
	Gp1ba
	Brd9
	Nsa2
	Rpp14
	Defa1
	Peg10
	Dock3
	Kat6b
	Magi1
	Dag1
	Lyst
	Gip
	Bcl2l1
	Myo5a
	Ccdc162p
	Pnkd
	Fam49b
	Rragb
	Rab11fip3
	Rnaseh2b
	Pcdhgb6
	Wdfy1
	Vgll1
	Acox2
	Smyd2
	Dnah11
	Med14
	Cpd
	Eef2
	Arap3
	Ubqln1
	Tmem106b
	Cggbp1
	Ssr3
	Fbp1
	Lrrc46
	Szrd1
	Xk
	Bcas1
	Serpinb8
	Atp6ap2
	Zkscan7
	Aif1
	Nudcd3
	Slc2a4
	Treml1
	Taar5
	Lztfl1
	S100a12
	Ep300
	Lrrc59
	Gpsm1
	Srsf9
	Pfkfb4
	Srp54
	Sema3e
	Cpeb4
	Hlcs
	Pcdhga11
	Bin3
	Rabggta
	Nlrp2
	Calml5
	Fgd6
	Capn11
	Hs3st2
	Tns3
	Ccm2l
	Gatsl2
	Ldb3
	Cct6a
	Zzz3
	Xrcc3
	Tcf21
	Bend2
	Diaph2-as1
	Nexn
	Ppfia3
	Rfc4
	Rnf166
	Cyp2e1
	Rnf168
	Jakmip1
	Cops4
	Ginm1
	Mdm1
	Cpsf3l
	Dst
	Ccdc102b
	Lphn2
	Kiaa0101
	Csf2rb
	Plekhb2
	Hla-dpb1
	Slc31a1
	Tspan3
	Grik1
	Tshz2
	C2cd2
	Nbr1
	Tgif2
	Znf227
	Dennd2d
	Cadm1
	Mos
	Slc45a1
	Plekha4
	Plxna1
	Tnks1bp1
	Rab34
	Creld2
	C17orf85
	Acbd6
	Ttc7b
	Mboat1
	Xylt2
	Stk17a
	Ero1lb
	Rfwd2
	Sh2b2
	Ccr2
	Arrb2
	Uqcrb
	Tnfrsf1b
	Dhrs11
	Lars2
	C21orf59
	Zap70
	Atrn
	Prom1
	Spink2
	Rps8
	Kcne4
	Trnau1ap
	Znf814
	Upf2
	Stag2
	Dhrs13
	Sdf4
	Pcdh18
	Zfhx3
	Dlgap4
	Scn1a
	Gne
	Sh3glb1
	Pnpla3
	Tctn3
[truncated: 5,217 more rows]
